# Supplementary material for: Altered microbiota-host metabolic cross talk preceding neutropenic fever in patients with acute leukemia
Source: PubMed Central journal article supplement — Blood Adv. 2021 Oct 14;5(20):3937–50. doi: 10.1182/bloodadvances.2021004973 (PMC8945620; doi:10.1182/bloodadvances.2021004973), 2021-10-14
Supplement: advancesADV2021004973-suppl1.pdf [file advancesADV2021004973-suppl1.pdf]

## Supplementary Methods

### Gut microbiome profiling

DNA was extracted using the DNeasy PowerSoil DNA isolation kit (QIAGEN, Hilden, Germany). The V4 hypervariable region of the 16S rRNA gene was amplified on an Illumina MiSeq platform (2 x 300 paired-end mode) by the University of Minnesota Genomics Center<sup>1</sup>. Sequences were processed in QIIME 2<sup>2</sup>. Quality filtering, adaptor trimming, and stitching of raw sequences were done using the quality control pipeline SHI7 (trim threshold 32, threshold of Q37)<sup>3</sup>. Paired ends were merged using FLASH<sup>4</sup>. Operational taxonomic unit (OTU) picking was done using NINJA-OPS (default parameters and 97% similarity threshold) and the Greengenes database; Bowtie2 was used for alignment<sup>5–7</sup>. OTUs with a frequency <0.01% of the reads were removed, as were those present in fewer than 10 samples. Sequence data were deposited in the Sequence Read Archive of the National Center for Biotechnology's Information (NCBI) under BioProject ID SRP141394. The BIOM table was exported from QIIME into R 3.4 (R Foundation for Statistical Computing, Vienna, Austria), where all downstream analyses were performed.

### Serum metabolome profiling

**Sample preparation.** Serum samples were prepared using the automated MicroLab STAR® system from Hamilton Company. For the metabolomic analysis, a total of 100 µL of sample was extracted under vigorous shaking for 2 min (Glen Mills GenoGrinder 2000) with methanol 80%, containing the following recovery standards: DL-2-fluorophenylglycine, tridecanoic acid, d6-cholesterol, and DL-4-chlorophenylalanine. The resulting extract was divided into 5 fractions: two for analysis by two separate reverse phase (RP)/UPLC-MS/MS methods with positive ion mode electrospray ionization (ESI), one for analysis by RP/UPLC-MS/MS with negative ion mode ESI, and one for analysis by HILIC/UPLC-MS/MS with negative ion mode ESI. The remaining aliquot was reserved for backup. Samples were placed briefly on a TurboVap® (Zymark) to remove the organic solvent. The sample extracts were stored overnight under nitrogen before preparation for analysis.

**Mass spectrometry.** All methods utilized a Waters ACQUITY UPLC and a Thermo Scientific Q-Exactive high-resolution/accurate mass spectrometer interfaced with a heated electrospray ionization (HESI-II) source and Orbitrap mass analyzer operated at  $R = 35,000$  mass resolution. The sample extract was dried then reconstituted in solvents compatible to each of the four methods. For each sample, two aliquots of each sample were reconstituted in 50 µL of 6.5 mM ammonium bicarbonate in water (pH 8) for the negative ion analysis and another two aliquots of each were reconstituted using 50 µL 0.1% formic acid in water (pH ~3.5) for the positive ion method. Each reconstitution solvent contained a series of standards at fixed concentrations to ensure injection and chromatographic consistency. The internal standards consist of a variety of deuterium labeled or halogenated biochemicals specifically designed both to cover the entire chromatographic run and to not interfere with the detection of any endogenous biochemicals. Authentic standards of d7-glucose, d3-leucine, d8-phenylalanine, and d5-tryptophan were purchased from Cambridge Isotope Laboratories (Andover, MA). d5-hippuric acid, d5-indole acetic acid, and d9-progesterone were procured from C/D/N

Isotopes, Inc. (Pointe-Claire, Quebec). Bromophenylalanine was provided by Sigma-Aldrich Co. LLC. (St. Louis, MO) and amitriptyline was from MP Biomedicals, LLC. (Aurora, OH). Recovery standards of DL-2-fluorophenylglycine and DL-4-chlorophenylalanine were from Aldrich Chemical Co. (Milwaukee, WI). Tridecanoic acid was purchased from Sigma-Aldrich (St. Louis, MO) and d6-cholesterol was from Cambridge Isotope Laboratories (Andover, MA). Standards for the HILIC dilution series of alpha-ketoglutarate, ATP, malic acid, NADH, and oxaloacetic acid were purchased from Sigma-Aldrich Co. LLC. (St. Louis, MO) while succinic acid, pyruvic acid and NAD<sup>+</sup> were purchased from MP Biomedicals, LLC. (Santa Ana, CA). Limit of detection (LOD) for standards analyzed in a dilution series using reverse phase chromatography is available in **Table 1**.

**Table 1:** Limit of detection (LOD) for standards in a dilution series using reverse-phase chromatography

| Standard              | HRAM LOD ng/mL | UMR LOD ng/mL |
|-----------------------|----------------|---------------|
| d7-glucose            | 1.0            | 50.0          |
| d3-leucine            | 0.25           | 5.0           |
| d8-phenylalanine      | 0.25           | 3.0           |
| d5-tryptophan         | 0.25           | 25.0          |
| d5-hippuric acid      | 0.25           | 5.0           |
| Br-phenylalanine      | 0.25           | 3.0           |
| d5-indole acetic acid | 3.0            | 25.0          |
| amitriptyline         | 0.5            | 3.0           |
| d9-progesterone       | 1.0            | 25.0          |

One aliquot was analyzed using acidic positive ion conditions (LC pos), chromatographically optimized for more hydrophilic compounds. In this method, the extract was gradient eluted from a C18 column (Waters UPLC BEH C18-2.1 × 100 mm, 1.7 µm) using water and methanol, containing 0.05% perfluoropentanoic acid (PFPA) and 0.1% formic acid (FA) at pH = 2.5. Elution was performed at 0.35 mL min<sup>-1</sup> in a linear gradient from 5% to 80% of methanol containing 0.1% FA and 0.05% PFPA over 3.35 min. A second aliquot was also analyzed using acidic positive ion conditions; however, it was chromatographically optimized for more hydrophobic compounds. In this method, the extract was gradient eluted from the same aforementioned C18 column using methanol 50%, acetonitrile 50%, water, 0.05 % PFPA, and 0.01 % FA at pH = 2.5 and was operated at an overall higher organic content. Elution was performed at 0.60 mL/min in a linear gradient from 40% to 99.5% over 1 min, hold 2.4 min at 99.5% of methanol 50%, acetonitrile 50%, 0.05% PFPA, and 0.01% FA. A third aliquot was analyzed using basic negative ion-optimized conditions with a separate dedicated C18 column (LC neg). The basic extracts were gradient eluted from the column using methanol 95% and water 5%, with 6.5 mM ammonium bicarbonate at pH 8. Elution was performed at 0.35 mL min<sup>-1</sup> with a linear gradient from 0.5% to 70% of methanol 95%, water 5% with 6.5 mM

ammonium bicarbonate over 4 min, followed by a rapid gradient to 99% in 0.5 min. The sample injection volume was 5  $\mu$ L and a 2 $\times$  needle loop overfill was used. Separations utilized separate acid and base-dedicated 2.1 mm  $\times$  100 mm Waters BEH C18 1.7  $\mu$ m columns held at 40  $^{\circ}$ C. The fourth aliquot was analyzed via negative ionization following elution from an HILIC column (LC HILIC) (Waters UPLC BEH Amide 2.1  $\times$  150 mm, 1.7  $\mu$ m, held at 40  $^{\circ}$ C) using a gradient consisting of water (15%), methanol (5%), and acetonitrile (80%) with 10 mM ammonium formate, pH 10.16. Elution flow rate was 0.5 mL/min with a linear gradient from 5% to 50% in 3.5 min, followed by a linear gradient from 50% to 95% in 2 min, of water (50%), acetonitrile (50%) with 10 mM ammonium formate, pH 10.6. The MS analysis alternated between MS and data-dependent MS<sub>n</sub> scans using dynamic exclusion. The scan range varied slightly between methods but covered 70–1000 *m/z*.

**Quality assurance and quality control (QA/QC).** Several types of controls were analyzed in concert with the experimental samples: a pooled matrix sample generated by taking a small volume of each experimental sample served as a technical replicate throughout the platform run; extracted water samples served as process blanks; and a cocktail of QC standards (carefully chosen not to interfere with the measurement of endogenous compounds) spiked into every analyzed sample allowed instrument performance monitoring and aided chromatographic alignment. **Tables 2-4** describe QC samples and standards. Instrument variability was determined by calculating the median relative standard deviation (RSD) for the internal standards that were added to each sample prior to injection into the mass spectrometers (median RSD = 3–4%). Instruments are calibrated at least weekly in the utilized polarity using thermo and mass accuracy is monitored at the batch level for the internal standards. A batch fails QC if any of the internal standards are more than 5 ppm away from the theoretical mass. Overall process variability was determined by calculating the median RSD for all endogenous metabolites (i.e., non-instrument standards) present in 100% of the pooled matrix (MTRX) samples, which are technical replicates created from a large pool of extensively characterized human plasma. The median RSD for MTRX samples was 9–10%. Five MTRX samples and three process blank samples were processed per every batch of 30 samples. Experimental samples were randomized across the platform run with QC samples spaced evenly among the injections, as outlined in **Figure 1** below.

**Table 2:** Description of metabolon QC samples

| Type  | Description                                                         | Purpose                                                                                                                            |
|-------|---------------------------------------------------------------------|------------------------------------------------------------------------------------------------------------------------------------|
| CMTRX | Pool created by taking a small aliquot from every customer samples. | Assess the effect of a non-plasma matrix on the Metabolon process and distinguish biological variability from process variability. |
| PRCS  | Aliquot of ultra-pure water                                         | Process Blank used to assess the contribution to compound signals from the process.                                                |
| SOLV  | Aliquot of solvents used in extraction.                             | Solvent Blank used to segregate contamination sources in the extraction.                                                           |

**Table 3:** Metabolon QC standards

| Type | Description       | Purpose                                                                      |
|------|-------------------|------------------------------------------------------------------------------|
| RS   | Recovery Standard | Assess variability and verify performance of extraction and instrumentation. |
| IS   | Internal Standard | Assess variability and performance of instrument.                            |

**Table 4:** Quality control internal standards

| Condition | Internal standards                                                                                                                                                                                                    |
|-----------|-----------------------------------------------------------------------------------------------------------------------------------------------------------------------------------------------------------------------|
| LC neg    | d7-glucose<br>d3-methionine<br>d3-leucine<br>d8-phenylalanine<br>d5-tryptophan<br>Br-phenylalanine<br>d15-octanoic acid<br>d19-decanoic acid<br>d27-tetradecanoic acid<br>d35-octadecanoic acid<br>d2-eicosanoic acid |
| LC HILIC  | d35-octadecanoic acid<br>d5-indole acetic acid<br>Br-phenylalanine<br>d5-tryptophan                                                                                                                                   |

|        |                                                                                                                                                                                                                           |
|--------|---------------------------------------------------------------------------------------------------------------------------------------------------------------------------------------------------------------------------|
|        | d4-tyrosine<br>d3-serine<br>d3-aspartic acid<br>d7-ornithine<br>d4-lysine                                                                                                                                                 |
| LC pos | d7-glucose<br>d3-methionine<br>d3-leucine<br>d8-phenylalanine<br>d5-tryptophan<br>Br-phenylalanine<br>d4-tyrosine<br>d5-indole acetic acid<br>d5-hippuric acid<br>amitriptyline<br>d9-progesterone<br>d4-diethylphthalate |

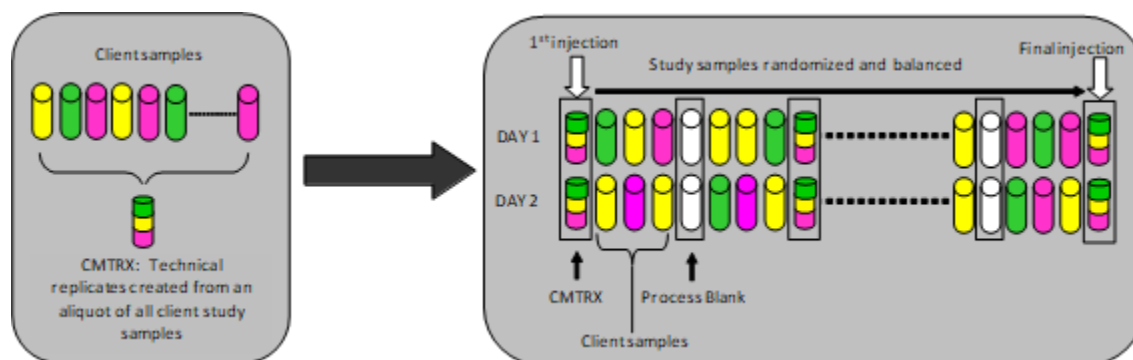

**Figure 1. Preparation of client-specific technical replicates.** A small aliquot of each client sample (colored cylinders) is pooled to create a CMTRX technical replicate sample (multi-colored cylinder), which is then injected periodically throughout the platform run. Variability among consistently detected biochemicals can be used to calculate an estimate of overall process and platform variability.

All studies include the analysis of a technical replicate of a sample pooled from the experimental samples. This pool was analyzed 16 times over the course of the analysis of the experimental samples in the present study.

**Compound identification and quantification.** Raw data were extracted, peak-identified, and QC processed using Metabolon pipelines. Compounds were identified by comparison to library entries of purified standards or recurrent unknown entities<sup>8,9</sup>. Briefly, Metabolon maintains a library based on authenticated standards (analyzed using the same methodology as the experimental samples) that contains the retention time/index (RI), mass to charge ratio ( $m/z$ ), and chromatographic data (including MS/MS spectral data) on all molecules present in the library. Furthermore, biochemical identifications are based on three criteria: retention index within a narrow RI window of the proposed

identification (typically within a 5 second window), accurate mass match to the library  $\pm 10$  ppm (typically well within a 5 ppm window), and the MS/MS forward and reverse scores between the experimental data and authentic standards. The MS/MS scores are based on a comparison of the ions present in the experimental spectrum to the ions present in the library spectrum. While there may be similarities between these molecules based on one of these factors, the use of all three data points can be utilized to distinguish and differentiate biochemicals. More than 3300 commercially available purified standard compounds have been acquired and registered for analysis on all platforms for determination of their analytical characteristics. Compounds in **supplementary data 1** for which no authentic standards were available for confirmation are marked with an “\*” after the compound name to designate these as Metabolomics Standards Initiative level 2/3<sup>10</sup>. Most such identifications are based on the experimental signature having the same characteristics as the compound class. For example, sphingomyelins all have a conserved fragmentation spectrum and so have a highly diagnostic pattern in order to permit the identification of the experimental signature as a sphingomyelin. The QC and curation processes were designed to ensure accurate and consistent identification of true chemical entities, and to remove those representing system artifacts, mis-assignments, and background noise. Metabolon data analysts use proprietary visualization and interpretation software to confirm the consistency of peak identification among the various samples. Library matches for each compound were checked for each sample and corrected if necessary. Peaks were quantified using area-under-the-curve. A data normalization step was performed to correct variation resulting from instrument inter-day tuning differences. Essentially, each compound was corrected in run-day blocks by registering the medians to equal 1 and normalizing each data point proportionately. Metabolites were assigned to pathways based on three publicly available key chemical information resources: PubChem, HMDB and KEGG pathway database.

## References

1. Gohl DM, Vangay P, Garbe J, et al. Systematic improvement of amplicon marker gene methods for increased accuracy in microbiome studies. *Nat. Biotechnol.* 2016;34(9):942–949.
2. Bolyen E, Rideout JR, Dillon MR, et al. Reproducible, interactive, scalable and extensible microbiome data science using QIIME 2. *Nat. Biotechnol.* 2019;37(8):852–857.
3. Al-Ghalith GA, Hillmann B, Ang K, Shields-Cutler R, Knights D. SHI7 Is a Self-Learning Pipeline for Multipurpose Short-Read DNA Quality Control. *mSystems.* 2018;3(3.):
4. Magoč T, Salzberg SL. FLASH: fast length adjustment of short reads to improve genome assemblies. *Bioinformatics.* 2011;27(21):2957–2963.
5. Al-Ghalith GA, Montassier E, Ward HN, Knights D. NINJA-OPS: Fast Accurate Marker Gene Alignment Using Concatenated Ribosomes. *PLoS Comput. Biol.* 2016;12(1):e1004658.
6. DeSantis TZ, Hugenholtz P, Larsen N, et al. Greengenes, a chimera-checked 16S rRNA gene database and workbench compatible with ARB. *Appl. Environ. Microbiol.* 2006;72(7):5069–5072.
7. Langmead B, Salzberg SL. Fast gapped-read alignment with Bowtie 2. *Nat.*

- Methods*. 2012;9(4):357–359.
8. DeHaven CD, Evans AM, Dai H, Lawton KA. Organization of GC/MS and LC/MS metabolomics data into chemical libraries. *J. Cheminform*. 2010;2(1):9.
  9. DeHaven CD, Evans AM, Dai H, Lawton KA. Software techniques for enabling high-throughput analysis of metabolomic datasets. *Metabolomics*. 2012;10:167–192.
  10. Sumner LW, Amberg A, Barrett D, et al. Proposed minimum reporting standards for chemical analysis Chemical Analysis Working Group (CAWG) Metabolomics Standards Initiative (MSI). *Metabolomics*. 2007;3(3):211–221.

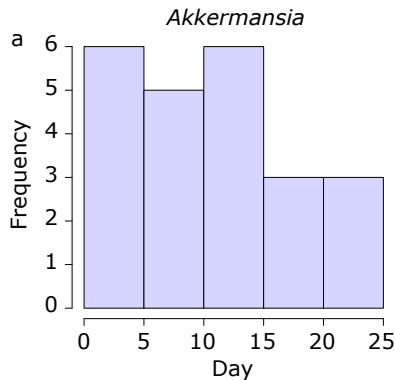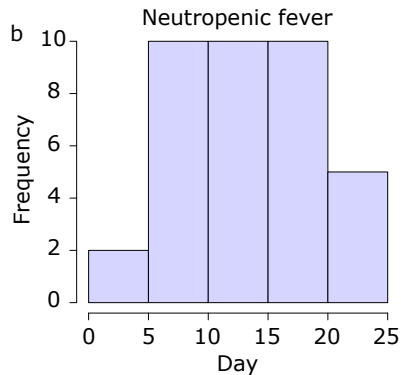

**Supplementary Figure S1: Dynamics of *Akkermansia* abundance relative to neutropenic fever**

**(a)** Change point analysis showing changes in *Akkermansia* relative abundance at different time points. The y-axis shows the number of patients who experienced the largest change in gut *Akkermansia* relative abundance on the corresponding day along the x-axis. Analysis was done using the *change point* package in R (cpt.mean function, “at most one change” [AMOC] method, and default parameters). **(b)** Histogram of NF frequency relative to time. Time is measured from the first day of chemotherapy.

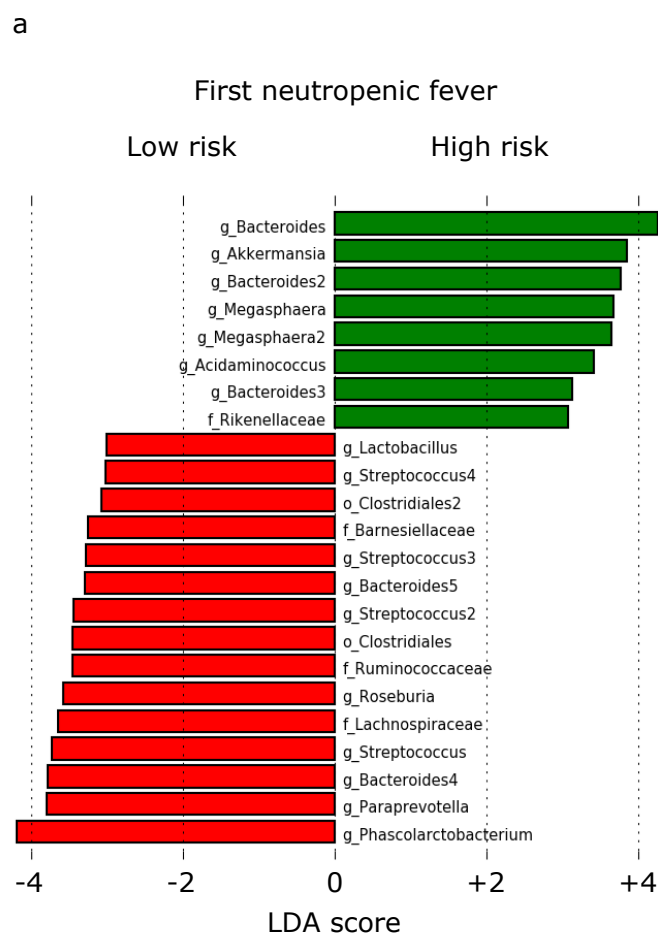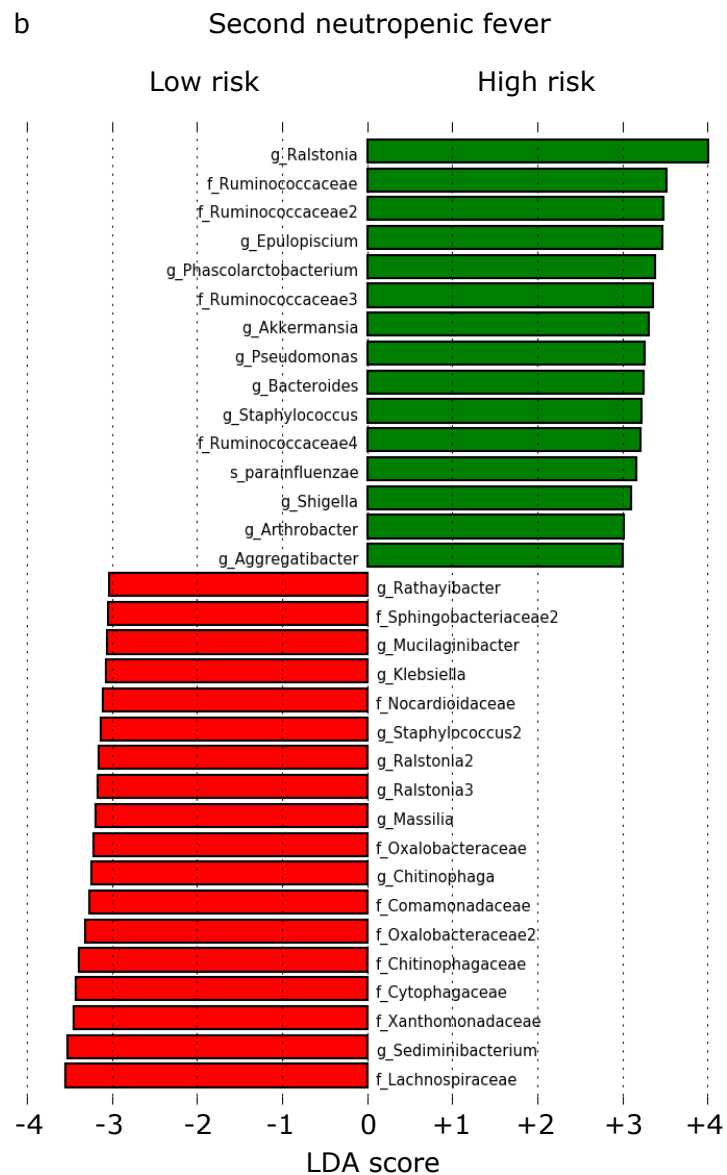

**Supplementary Figure S2: Differentially abundant taxa in high- vs. low-risk stool samples based on first vs. second episode of neutropenic fever**

Linear discriminant analysis (LDA) coupled with effect size measurements (LEfSe) in each subgroup is shown separately. The plot in panel (a) was generated using all samples collected before the first neutropenic fever and the plot in panel (b) was generated using all samples collected between the first and second neutropenic fever episodes. High- and low-risk samples were defined similar to Figure 2b. Differentially abundant OTUs (LDA score >3.0,  $p < 0.05$ ) in high-risk samples are shown as green bars to the right; those more abundant in low-risk samples are shown as red bars to the left. "o", "f" and "g" indicate order, family and genus, respectively.

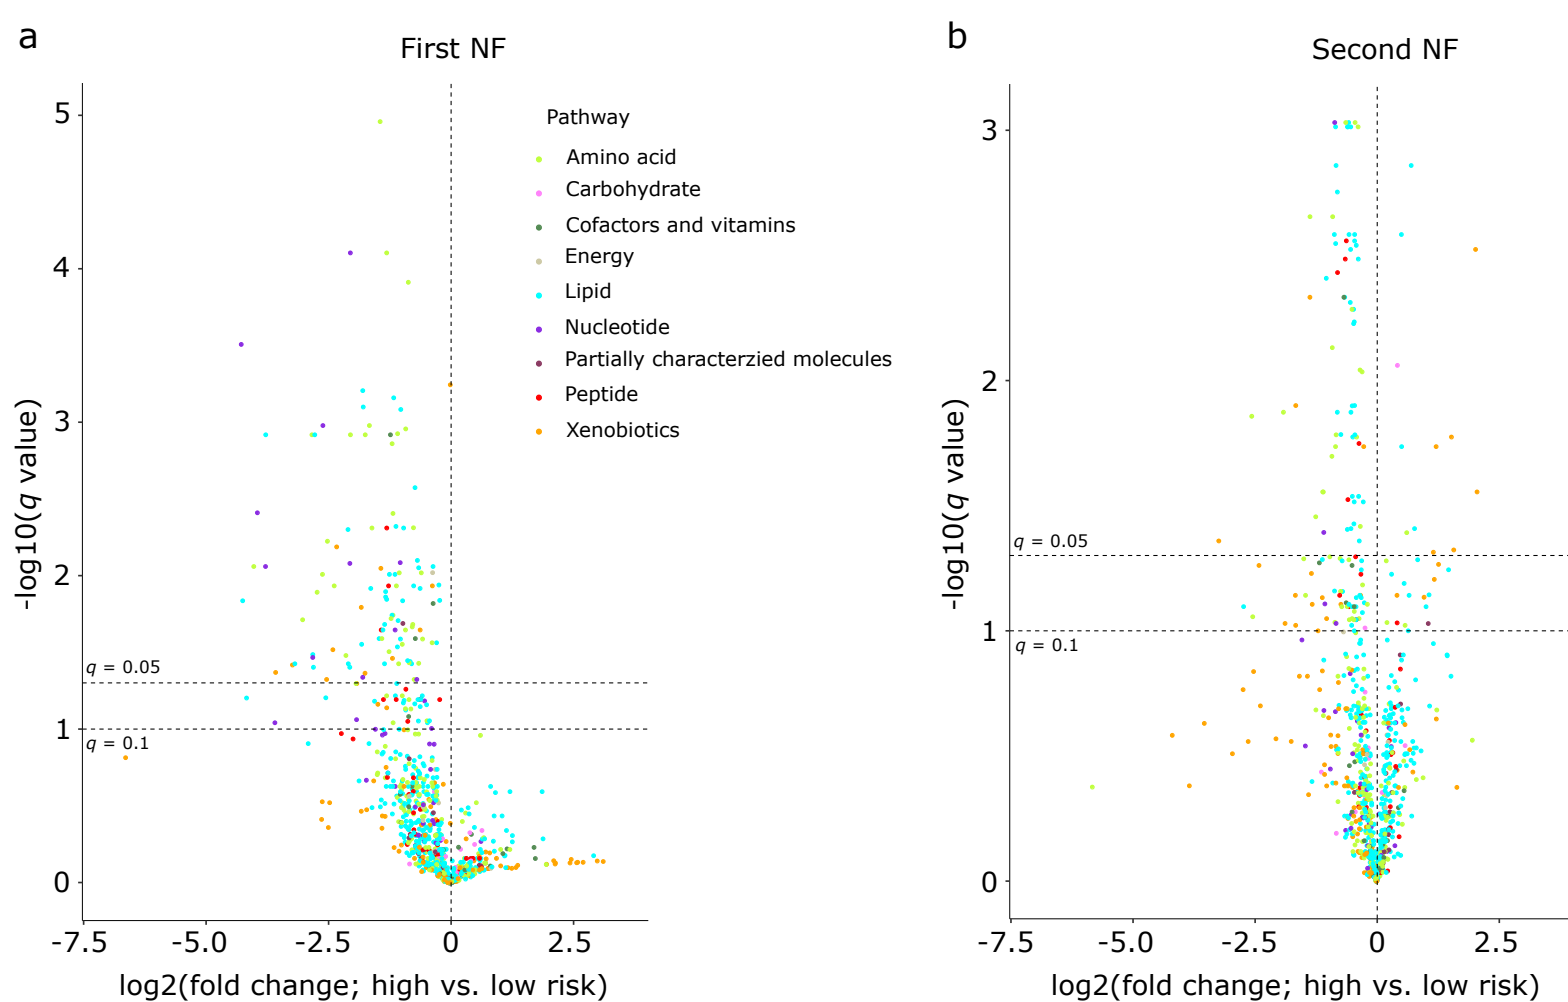

**Supplementary Figure S3. Serum metabolomics associated with first vs. second NF (post-hoc exploratory analysis)** Volcano plots showing the magnitude and significance of metabolomic changes within 24 hours before first (**a**) and second (**b**) NF. High-risk (preceding NF within 24 hours) and low-risk samples (not preceding NF within 24 hours) were compared. Points to the right (left) of the vertical line (no change) in each panel represent metabolites that were increased (decreased) before NF. The horizontal lines represent  $q=0.05$  and  $q=0.1$ , above which the metabolites are statistically significant according to the corresponding threshold.  $p$  values from Welch's t-test were corrected for multiple testing to derive the  $q$  values. The complete list of metabolites is provided in supplementary data 2-3.

**Supplementary data 1: UPLC-MS/MS metabolites in serum**

Compounds in column B for which no authentic standards were available for confirmation are marked with \* after the compound name to designate these as Metabolomics Standards Initiative level 2/3

Metabolites were assigned to pathways based on three publicly available key chemical information resources: PubChem, HMDB and KEGG. PCM: Partially Characterized Molecules

Fold change and log<sub>2</sub> fold change compared samples preceding vs. not preceding NF within 24 hours

Cells in column B colored in gold indicate metabolites detectable in <50% of samples

Color coding in column G was applied along the fold change gradient, with blue and red representing decreased and increased levels in samples preceding vs. not preceding NF within 24 hours

Color coding in column J was applied along the q value gradient, with darker colors indicating more significant values

p values are from Welch's two-sample t-test. q values are derived after FDR correction for multiple testing

| code  | metabolite                                             | pathway                | sub_pathway                                                  | retention<br>index | mass | fold<br>change | log2<br>foldchange | p      | q      |
|-------|--------------------------------------------------------|------------------------|--------------------------------------------------------------|--------------------|------|----------------|--------------------|--------|--------|
| M40   | asparagine                                             | Amino Acid             | Alanine and Aspartate Metabolism                             | 1225               | 133  | 0.69           | -0.53              | 0.0000 | 0.0000 |
| M17   | threonine                                              | Amino Acid             | Glycine, Serine and Threonine Metabolism                     | 1514               | 120  | 0.58           | -0.79              | 0.0000 | 0.0000 |
| M4219 | uridine                                                | Nucleotide             | Pyrimidine Metabolism, Uracil containing                     | 1457.6             | 243  | 0.50           | -1.00              | 0.0000 | 0.0000 |
| M527  | guanidinoacetate                                       | Amino Acid             | Creatine Metabolism                                          | 2884               | 116  | 0.31           | -1.70              | 0.0000 | 0.0000 |
| M2601 | 2-palmitoyl-GPC* (16:0)*                               | Lipid                  | Lysophospholipid                                             | 6215               | 570  | 0.61           | -0.72              | 0.0000 | 0.0000 |
| M2834 | 1-(1-enyl-palmitoyl)-GPE (P-16:0)*                     | Lipid                  | Lysoplasmalogen                                              | 1558               | 438  | 0.63           | -0.67              | 0.0000 | 0.0000 |
| M105  | lysine                                                 | Amino Acid             | Lysine Metabolism                                            | 2850               | 147  | 0.70           | -0.52              | 0.0000 | 0.0000 |
| M2833 | 1-(1-enyl-palmitoyl)-GPC (P-16:0)*                     | Lipid                  | Lysoplasmalogen                                              | 1547               | 480  | 0.51           | -0.98              | 0.0000 | 0.0000 |
| M2838 | 1-(1-enyl-stearoyl)-GPE (P-18:0)*                      | Lipid                  | Lysoplasmalogen                                              | 1649               | 466  | 0.61           | -0.71              | 0.0000 | 0.0000 |
| M2240 | glycerophosphoethanolamine                             | Lipid                  | Phospholipid Metabolism                                      | 659                | 216  | 0.72           | -0.47              | 0.0000 | 0.0000 |
| M649  | gamma-glutamylcitrulline*                              | Peptide                | Gamma-glutamyl Amino Acid                                    | 1644               | 305  | 0.50           | -1.00              | 0.0000 | 0.0000 |
| M121  | fructosyllsine                                         | Amino Acid             | Lysine Metabolism                                            | 2784               | 309  | 0.51           | -0.97              | 0.0000 | 0.0000 |
| M2673 | 1-linoleoyl-GPE (18:2)*                                | Lipid                  | Lysophospholipid                                             | 1482               | 478  | 0.53           | -0.90              | 0.0000 | 0.0000 |
| M640  | gamma-glutamyl-alpha-lysine                            | Peptide                | Gamma-glutamyl Amino Acid                                    | 2784               | 276  | 0.59           | -0.76              | 0.0000 | 0.0000 |
| M644  | gamma-glutamylthreonine                                | Peptide                | Gamma-glutamyl Amino Acid                                    | 1750               | 249  | 0.58           | -0.79              | 0.0000 | 0.0000 |
| M2602 | 1-palmitoleyl-GPC* (16:1)*                             | Lipid                  | Lysophospholipid                                             | 1450               | 494  | 0.56           | -0.83              | 0.0000 | 0.0000 |
| M48   | N-acetylglutamine                                      | Amino Acid             | Glutamate Metabolism                                         | 771                | 187  | 0.46           | -1.12              | 0.0000 | 0.0000 |
| M2600 | 1-palmitoyl-GPC (16:0)                                 | Lipid                  | Lysophospholipid                                             | 1525               | 496  | 0.71           | -0.50              | 0.0000 | 0.0000 |
| M2603 | 2-palmitoleyl-GPC* (16:1)*                             | Lipid                  | Lysophospholipid                                             | 5720               | 568  | 0.54           | -0.90              | 0.0000 | 0.0000 |
| M492  | citrulline                                             | Amino Acid             | Urea cycle; Arginine and Proline Metabolism                  | 1520               | 176  | 0.65           | -0.63              | 0.0000 | 0.0000 |
| M45   | glutamine                                              | Amino Acid             | Glutamate Metabolism                                         | 1291               | 147  | 0.75           | -0.41              | 0.0000 | 0.0000 |
| M2836 | 1-(1-enyl-oleoyl)-GPE (P-18:1)*                        | Lipid                  | Lysoplasmalogen                                              | 6250               | 462  | 0.64           | -0.65              | 0.0000 | 0.0000 |
| M3315 | cortisone                                              | Lipid                  | Corticosteroids                                              | 4575               | 359  | 1.54           | 0.63               | 0.0000 | 0.0000 |
| M2613 | 1-oleoyl-GPC (18:1)                                    | Lipid                  | Lysophospholipid                                             | 1540               | 522  | 0.71           | -0.49              | 0.0000 | 0.0000 |
| M29   | alanine                                                | Amino Acid             | Alanine and Aspartate Metabolism                             | 1700               | 90   | 0.74           | -0.43              | 0.0000 | 0.0000 |
| M2616 | 1-linoleyl-GPC (18:2)                                  | Lipid                  | Lysophospholipid                                             | 1465               | 520  | 0.65           | -0.63              | 0.0000 | 0.0000 |
| M70   | histidine                                              | Amino Acid             | Histidine Metabolism                                         | 755.9              | 154  | 0.70           | -0.52              | 0.0000 | 0.0000 |
| M2236 | glycerophosphorylcholine (GPC)                         | Lipid                  | Phospholipid Metabolism                                      | 672                | 258  | 0.73           | -0.46              | 0.0000 | 0.0000 |
| M635  | gamma-glutamylglutamine                                | Peptide                | Gamma-glutamyl Amino Acid                                    | 1430               | 276  | 0.71           | -0.49              | 0.0000 | 0.0000 |
| M2708 | 1-palmitoyl-GPC (16:0)*                                | Lipid                  | Lysophospholipid                                             | 5570               | 483  | 0.71           | -0.49              | 0.0000 | 0.0000 |
| M2365 | 1-linoleyl-2-arachidonoyl-GPC (18:2/20:4n6)*           | Lipid                  | Phosphatidylcholine (PC)                                     | 2000               | 807  | 0.67           | -0.57              | 0.0000 | 0.0000 |
| M2686 | 1-arachidonoyl-GPE (20:4n6)*                           | Lipid                  | Lysophospholipid                                             | 1470               | 502  | 0.70           | -0.51              | 0.0000 | 0.0001 |
| M493  | homocysteine                                           | Amino Acid             | Urea cycle; Arginine and Proline Metabolism                  | 2882               | 189  | 0.47           | -1.10              | 0.0000 | 0.0001 |
| M4429 | retinol (Vitamin A)                                    | Cofactors and Vitamins | Vitamin A Metabolism                                         | 1636               | 269  | 0.60           | -0.74              | 0.0000 | 0.0001 |
| M2801 | 1-(1-enyl-palmitoyl)-2-linoleoyl-GPE (P-16:0/18:2)*    | Lipid                  | Plasmalogen                                                  | 2400               | 701  | 0.62           | -0.69              | 0.0000 | 0.0001 |
| M1894 | arachidonoylcarnitine (C20:4)                          | Lipid                  | Fatty Acid Metabolism (Acyl Carnitine, Polyunsaturated)      | 1353               | 448  | 0.61           | -0.71              | 0.0000 | 0.0001 |
| M2649 | 1-lignoceryl-GPC (24:0)                                | Lipid                  | Lysophospholipid                                             | 1907               | 608  | 0.47           | -1.08              | 0.0000 | 0.0001 |
| M2804 | 1-(1-enyl-palmitoyl)-2-arachidonoyl-GPE (P-16:0/20:4)* | Lipid                  | Plasmalogen                                                  | 2300               | 725  | 0.69           | -0.53              | 0.0000 | 0.0001 |
| M4220 | uracil                                                 | Nucleotide             | Pyrimidine Metabolism, Uracil containing                     | 827                | 113  | 0.42           | -1.25              | 0.0000 | 0.0001 |
| M2635 | 1-arachidonoyl-GPC* (20:4)*                            | Lipid                  | Lysophospholipid                                             | 1460               | 544  | 0.70           | -0.51              | 0.0000 | 0.0001 |
| M2618 | 1-linolenoyl-GPC (18:3)*                               | Lipid                  | Lysophospholipid                                             | 1410               | 518  | 0.56           | -0.85              | 0.0000 | 0.0001 |
| M1890 | ximenoylcarnitine (C26:1)*                             | Lipid                  | Fatty Acid Metabolism (Acyl Carnitine, Monounsaturated)      | 1607               | 538  | 0.44           | -1.17              | 0.0000 | 0.0001 |
| M2611 | 1-stearoyl-GPC (18:0)                                  | Lipid                  | Lysophospholipid                                             | 1606               | 524  | 0.71           | -0.49              | 0.0000 | 0.0001 |
| M2359 | 1,2-dilinoleoyl-GPC (18:2/18:2)                        | Lipid                  | Phosphatidylcholine (PC)                                     | 2100               | 783  | 0.67           | -0.57              | 0.0000 | 0.0001 |
| M4231 | 5,6-dihydrouracil                                      | Nucleotide             | Pyrimidine Metabolism, Uracil containing                     | 1120               | 113  | 0.36           | -1.46              | 0.0000 | 0.0001 |
| M4356 | oxalate (ethanedioate)                                 | Cofactors and Vitamins | Ascorbate and Aldarate Metabolism                            | 603                | 89   | 0.63           | -0.66              | 0.0000 | 0.0002 |
| M5117 | pyrraline                                              | Xenobiotics            | Food Component/Plant                                         | 2304               | 253  | 0.38           | -1.41              | 0.0000 | 0.0002 |
| M3078 | glycosyl ceramide (d18:1/20:0, d16:1/22:0)*            | Lipid                  | Hexosylceramides (HCEr)                                      | 3414               | 757  | 0.67           | -0.59              | 0.0000 | 0.0002 |
| M438  | S-methylmethionine                                     | Amino Acid             | Methionine, Cysteine, SAM and Taurine Metabolism             | 2555               | 164  | 0.19           | -2.43              | 0.0000 | 0.0002 |
| M2671 | 1-oleoyl-GPE (18:1)                                    | Lipid                  | Lysophospholipid                                             | 1554               | 480  | 0.69           | -0.53              | 0.0000 | 0.0003 |
| M429  | 2,3-dihydroxy-2-methylbutyrate                         | Amino Acid             | Leucine, Isoleucine and Valine Metabolism                    | 1318               | 133  | 0.24           | -2.06              | 0.0000 | 0.0003 |
| M2182 | linoleoyl ethanolamide                                 | Lipid                  | Endocannabinoid                                              | 6150               | 322  | 1.63           | 0.70               | 0.0000 | 0.0003 |
| M504  | N-acetylchitulline                                     | Amino Acid             | Urea cycle; Arginine and Proline Metabolism                  | 1010               | 218  | 0.26           | -1.92              | 0.0000 | 0.0003 |
| M495  | proline                                                | Amino Acid             | Urea cycle; Arginine and Proline Metabolism                  | 1664               | 116  | 0.74           | -0.43              | 0.0000 | 0.0003 |
| M2197 | N-stearoylserine*                                      | Lipid                  | Endocannabinoid                                              | 5777               | 370  | 0.70           | -0.51              | 0.0000 | 0.0004 |
| M632  | gamma-glutamylalanine                                  | Peptide                | Gamma-glutamyl Amino Acid                                    | 1986               | 219  | 0.62           | -0.70              | 0.0000 | 0.0004 |
| M1352 | mannose                                                | Carbohydrate           | Fructose, Mannose and Galactose Metabolism                   | 2200               | 225  | 1.42           | 0.50               | 0.0000 | 0.0004 |
| M391  | 1-carboxyethylisoleucine                               | Amino Acid             | Leucine, Isoleucine and Valine Metabolism                    | 2628               | 202  | 0.55           | -0.87              | 0.0000 | 0.0006 |
| M2810 | 1-(1-enyl-stearoyl)-2-linoleoyl-GPE (P-18:0/18:2)*     | Lipid                  | Plasmalogen                                                  | 2750               | 729  | 0.69           | -0.54              | 0.0000 | 0.0007 |
| M2818 | 1-(1-enyl-stearoyl)-2-arachidonoyl-GPE (P-18:0/20:4)*  | Lipid                  | Plasmalogen                                                  | 2550               | 753  | 0.69           | -0.53              | 0.0000 | 0.0007 |
| M4120 | hypoxanthine                                           | Nucleotide             | Purine Metabolism, (Hypo)Xanthine/Inosine containing         | 1291.2             | 135  | 0.55           | -0.86              | 0.0001 | 0.0008 |
| M499  | N-acetylarginine                                       | Amino Acid             | Urea cycle; Arginine and Proline Metabolism                  | 2245               | 217  | 0.59           | -0.76              | 0.0001 | 0.0008 |
| M4353 | threonate                                              | Cofactors and Vitamins | Ascorbate and Aldarate Metabolism                            | 2384               | 135  | 0.67           | -0.58              | 0.0001 | 0.0008 |
| M5585 | dexamethasone                                          | Xenobiotics            | Drug - Antiinflammatory, Immunosuppressant                   | 4974               | 391  | 0.10           | -3.36              | 0.0001 | 0.0008 |
| M5382 | 3-(cystein-5-yl)acetaminophen*                         | Xenobiotics            | Drug - Analgesics, Anesthetics                               | 2420               | 271  | 4.55           | 2.19               | 0.0001 | 0.0008 |
| M641  | gamma-glutamyl-epsilon-lysine                          | Peptide                | Gamma-glutamyl Amino Acid                                    | 2725               | 276  | 0.59           | -0.75              | 0.0001 | 0.0009 |
| M1    | glycine                                                | Amino Acid             | Glycine, Serine and Threonine Metabolism                     | 1375               | 76   | 0.74           | -0.43              | 0.0001 | 0.0011 |
| M4602 | 7-methylxanthine                                       | Xenobiotics            | Xanthine Metabolism                                          | 1350               | 167  | 0.40           | -1.31              | 0.0001 | 0.0012 |
| M5206 | tartrate (hydroxymalonate)                             | Xenobiotics            | Food Component/Plant                                         | 610                | 119  | 0.59           | -0.76              | 0.0001 | 0.0013 |
| M3261 | pregnenetriol sulfate*                                 | Lipid                  | Pregnenolone Steroids                                        | 4749               | 413  | 1.87           | 0.91               | 0.0001 | 0.0013 |
| M4121 | xanthine                                               | Nucleotide             | Purine Metabolism, (Hypo)Xanthine/Inosine containing         | 2023               | 151  | 0.27           | -1.89              | 0.0001 | 0.0014 |
| M2034 | 2R,3R-dihydroxybutyrate                                | Lipid                  | Fatty Acid, Dihydroxy                                        | 1543               | 119  | 0.70           | -0.51              | 0.0001 | 0.0014 |
| M2198 | N-palmitoylserine                                      | Lipid                  | Endocannabinoid                                              | 5557               | 342  | 0.60           | -0.74              | 0.0001 | 0.0014 |
| M4603 | 5-acetylamine-6-amino-3-methyluracil                   | Xenobiotics            | Xanthine Metabolism                                          | 1710               | 197  | 0.37           | -1.45              | 0.0001 | 0.0016 |
| M470  | hypotaurine                                            | Amino Acid             | Methionine, Cysteine, SAM and Taurine Metabolism             | 724                | 110  | 0.59           | -0.76              | 0.0001 | 0.0016 |
| M3058 | glycosyl-N-stearoyl-sphingosine (d18:1/18:0)           | Lipid                  | Hexosylceramides (HCEr)                                      | 3053               | 729  | 0.70           | -0.52              | 0.0001 | 0.0017 |
| M637  | gamma-glutamylhistidine                                | Peptide                | Gamma-glutamyl Amino Acid                                    | 2740               | 285  | 0.69           | -0.53              | 0.0002 | 0.0018 |
| M223  | dopamine 4-sulfate                                     | Amino Acid             | Tyrosine Metabolism                                          | 1511               | 232  | 0.40           | -1.31              | 0.0002 | 0.0019 |
| M636  | gamma-glutamylglycine                                  | Peptide                | Gamma-glutamyl Amino Acid                                    | 1535               | 205  | 0.67           | -0.58              | 0.0002 | 0.0019 |
| M1659 | glutarate (C5-DC)                                      | Lipid                  | Fatty Acid, Dicarboxylate                                    | 2900               | 131  | 0.45           | -1.14              | 0.0002 | 0.0019 |
| M5044 | S-allylcysteine                                        | Xenobiotics            | Food Component/Plant                                         | 2690               | 162  | 0.27           | -1.87              | 0.0002 | 0.0019 |
| M279  | 8-methoxymyrenate                                      | Amino Acid             | Tryptophan Metabolism                                        | 2574               | 220  | 0.42           | -1.27              | 0.0002 | 0.0021 |
| M4252 | cytosine                                               | Nucleotide             | Pyrimidine Metabolism, Cytidine containing                   | 2060               | 112  | 0.30           | -1.74              | 0.0002 | 0.0025 |
| M6086 | sulfate*                                               | Xenobiotics            | Chemical                                                     | 616                | 97   | 0.82           | -0.28              | 0.0002 | 0.0025 |
| M1240 | lactate                                                | Carbohydrate           | Glycolysis, Gluconeogenesis, and Pyruvate Metabolism         | 1469               | 89   | 0.81           | -0.30              | 0.0002 | 0.0025 |
| M3161 | sphingosine 1-phosphate                                | Lipid                  | Sphingosine                                                  | 1375               | 380  | 0.80           | -0.32              | 0.0003 | 0.0027 |
| M646  | gamma-glutamyltyrosine                                 | Peptide                | Gamma-glutamyl Amino Acid                                    | 2518               | 311  | 0.72           | -0.48              | 0.0003 | 0.0030 |
| M4600 | 1-methylxanthine                                       | Xenobiotics            | Xanthine Metabolism                                          | 1568.8             | 165  | 0.35           | -1.51              | 0.0003 | 0.0030 |
| M4601 | 3-methylxanthine                                       | Xenobiotics            | Xanthine Metabolism                                          | 1700               | 165  | 0.41           | -1.28              | 0.0003 | 0.0033 |
| M2232 | choline                                                | Lipid                  | Phospholipid Metabolism                                      | 1961               | 104  | 0.78           | -0.36              | 0.0003 | 0.0033 |
| M2662 | 1-palmitoyl-GPE (16:0)                                 | Lipid                  | Lysophospholipid                                             | 1544               | 454  | 0.75           | -0.42              | 0.0003 | 0.0034 |
| M648  | gamma-glutamylserine                                   | Peptide                | Gamma-glutamyl Amino Acid                                    | 1351               | 235  | 0.78           | -0.36              | 0.0003 | 0.0034 |
| M2813 | 1-(1-enyl-palmitoyl)-2-arachidonoyl-GPC (P-16:0/20:4)* | Lipid                  | Plasmalogen                                                  | 2200               | 767  | 0.76           | -0.39              | 0.0004 | 0.0035 |
| M224  | dopamine 3-O-sulfate                                   | Amino Acid             | Tyrosine Metabolism                                          | 1556.2             | 232  | 0.54           | -0.89              | 0.0004 | 0.0035 |
| M4322 | trigonelline (N'-methylnicotinate)                     | Cofactors and Vitamins | Nicotinate and Nicotinamide Metabolism                       | 1388               | 138  | 0.46           | -1.12              | 0.0004 | 0.0035 |
| M4816 | alliin                                                 | Xenobiotics            | Food Component/Plant                                         | 1470               | 178  | 0.28           | -1.82              | 0.0004 | 0.0036 |
| M2141 | 12-HETE                                                | Lipid                  | Eicosanoid                                                   | 5326               | 319  | 0.15           | -2.75              | 0.0004 | 0.0038 |
| M420  | 1-carboxyethylvaline                                   | Amino Acid             | Leucine, Isoleucine and Valine Metabolism                    | 2008               | 188  | 0.69           | -0.54              | 0.0004 | 0.0038 |
| M4324 | N1-Methyl-2-pyridone-5-carboxamide                     | Cofactors and Vitamins | Nicotinate and Nicotinamide Metabolism                       | 1668               | 151  | 0.61           | -0.71              | 0.0004 | 0.0039 |
| M2888 | diacylglycerol (14:0/18:1, 16:0/16:1) [2]*             | Lipid                  | Diacylglycerol                                               | 3183               | 585  | 0.47           | -1.10              | 0.0005 | 0.0044 |
| M5379 | 2-hydroxyacetaminophen sulfate*                        | Xenobiotics            | Drug - Analgesics, Anesthetics                               | 1674               | 246  | 2.48           | 1.31               | 0.0006 | 0.0052 |
| M3091 | lactosyl-N-nervonoyl-sphingosine (d18:1/24:1)*         | Lipid                  | Lactosylceramides (LCEr)                                     | 3778               | 973  | 0.60           | -0.73              | 0.0006 | 0.0052 |
| M2173 | N-stearoyltaurine                                      | Lipid                  | Endocannabinoid                                              | 5782               | 390  | 0.67           | -0.58              | 0.0006 | 0.0052 |
| M42   | N-acetylparagine                                       | Amino Acid             | Alanine and Aspartate Metabolism                             | 785                | 175  | 0.70           | -0.51              | 0.0006 | 0.0054 |
| M4133 | allantoin                                              | Nucleotide             | Purine Metabolism, (Hypo)Xanthine/Inosine containing         | 1672               | 157  | 0.52           | -0.95              | 0.0006 | 0.0054 |
| M510  | N2,N5-diacetylornithine                                | Amino Acid             | Urea cycle; Arginine and Proline Metabolism                  | 1367               | 215  | 0.63           | -0.66              | 0.0006 | 0.0055 |
| M1870 | cerotylcarnitine (C26)*                                | Lipid                  | Fatty Acid Metabolism (Acyl Carnitine, Long Chain Saturated) | 1649               | 540  | 0.44           | -1.18              | 0.0007 | 0.0059 |

|       |                                                                     |              |                                                              |        |     |      |       |        |        |
|-------|---------------------------------------------------------------------|--------------|--------------------------------------------------------------|--------|-----|------|-------|--------|--------|
| M162  | tyrosine                                                            | Amino Acid   | Tyrosine Metabolism                                          | 2430   | 182 | 0.81 | -0.31 | 0.0007 | 0.0060 |
| M454  | alpha-ketobutyrate                                                  | Amino Acid   | Methionine, Cysteine, SAM and Taurine Metabolism             | 940    | 101 | 1.61 | 0.68  | 0.0007 | 0.0061 |
| M278  | xanthurenate                                                        | Amino Acid   | Tryptophan Metabolism                                        | 2236   | 206 | 0.60 | -0.74 | 0.0007 | 0.0061 |
| M4131 | urate                                                               | Nucleotide   | Purine Metabolism, (Hypo)Xanthine/Inosine containing         | 757.1  | 167 | 0.69 | -0.53 | 0.0008 | 0.0061 |
| M457  | S-methylcysteine                                                    | Amino Acid   | Methionine, Cysteine, SAM and Taurine Metabolism             | 880    | 134 | 0.73 | -0.46 | 0.0008 | 0.0062 |
| M2713 | 1-oleoyl-GPG (18:1)*                                                | Lipid        | Lysophospholipid                                             | 5610   | 509 | 0.60 | -0.74 | 0.0008 | 0.0066 |
| M2159 | oleoyl ethanolamide                                                 | Lipid        | Endocannabinoid                                              | 6450   | 324 | 1.42 | 0.50  | 0.0009 | 0.0070 |
| M505  | N-acetylproline                                                     | Amino Acid   | Urea cycle; Arginine and Proline Metabolism                  | 1695   | 158 | 0.69 | -0.53 | 0.0009 | 0.0074 |
| M4817 | N-acetylallin                                                       | Xenobiotics  | Food Component/Plant                                         | 1348   | 220 | 0.31 | -1.68 | 0.0009 | 0.0074 |
| M4280 | 5,6-dihydrothymine                                                  | Nucleotide   | Pyrimidine Metabolism, Thymine containing                    | 1637.8 | 127 | 0.35 | -1.53 | 0.0010 | 0.0076 |
| M92   | 1-methyl-5-imidazoleacetate                                         | Amino Acid   | Histidine Metabolism                                         | 1989   | 141 | 0.52 | -0.96 | 0.0010 | 0.0078 |
| M2809 | 1-(1-ethyl-stearoyl)-2-oleoyl-GPE (P-18:0/18:1)                     | Lipid        | Plasmalogen                                                  | 3100   | 731 | 0.80 | -0.33 | 0.0010 | 0.0079 |
| M6089 | O-sulfo-L-tyrosine                                                  | Xenobiotics  | Chemical                                                     | 990    | 260 | 0.75 | -0.41 | 0.0010 | 0.0079 |
| M5376 | 3-(N-acetyl-L-cystein-S-yl) acetaminophen                           | Xenobiotics  | Drug - Analgesics, Anesthetics                               | 2094   | 311 | 2.87 | 1.52  | 0.0011 | 0.0081 |
| M261  | C-glycosyltryptophan                                                | Amino Acid   | Tryptophan Metabolism                                        | 1777   | 365 | 0.77 | -0.38 | 0.0011 | 0.0081 |
| M5386 | 3-(methylthio)acetaminophen sulfate*                                | Xenobiotics  | Drug - Analgesics, Anesthetics                               | 2265   | 276 | 2.51 | 1.33  | 0.0011 | 0.0084 |
| M3243 | pregnenolone sulfate                                                | Lipid        | Pregnenolone Steroids                                        | 5100   | 395 | 1.67 | 0.74  | 0.0012 | 0.0088 |
| M117  | hydroxy-N6,N6,N6-trimethyllysine*                                   | Amino Acid   | Lysine Metabolism                                            | 2759   | 205 | 0.68 | -0.56 | 0.0013 | 0.0093 |
| M5214 | 3-indoleglyoxylic acid                                              | Xenobiotics  | Food Component/Plant                                         | 2140   | 188 | 0.71 | -0.49 | 0.0013 | 0.0095 |
| M458  | S-methylcysteine sulfoxide                                          | Amino Acid   | Methionine, Cysteine, SAM and Taurine Metabolism             | 900    | 152 | 0.67 | -0.58 | 0.0014 | 0.0099 |
| M127  | glutarylcarntine (CS-DC)                                            | Amino Acid   | Lysine Metabolism                                            | 2393   | 276 | 0.69 | -0.53 | 0.0014 | 0.0100 |
| M947  | prolylglycine                                                       | Peptide      | Dipeptide                                                    | 2136   | 173 | 0.60 | -0.74 | 0.0016 | 0.0112 |
| M5380 | 2-methoxyacetaminophen sulfate*                                     | Xenobiotics  | Drug - Analgesics, Anesthetics                               | 1949   | 260 | 4.40 | 2.14  | 0.0016 | 0.0112 |
| M3386 | 5alpha-androstan-3beta,17beta-diol disulfate                        | Lipid        | Androgenic Steroids                                          | 3880   | 225 | 0.60 | -0.75 | 0.0016 | 0.0112 |
| M1950 | stearoylcholine*                                                    | Lipid        | Fatty Acid Metabolism (Acyl Choline)                         | 1520   | 370 | 0.58 | -0.78 | 0.0017 | 0.0116 |
| M2360 | 1-linoleoyl-2-linolenoyl-GPC (18:2/18:3)*                           | Lipid        | Phosphatidylcholine (PC)                                     | 1939   | 781 | 0.67 | -0.59 | 0.0017 | 0.0116 |
| M3068 | glycosyl-N-behenoyl-sphingadienine (d18:2/22:0)*                    | Lipid        | Hexosylceramides (HCER)                                      | 3420   | 783 | 0.73 | -0.46 | 0.0018 | 0.0120 |
| M2814 | 1-(1-ethyl-palmitoyl)-2-linoleoyl-GPC (P-16:0/18:2)*                | Lipid        | Plasmalogen                                                  | 2300   | 743 | 0.83 | -0.26 | 0.0018 | 0.0122 |
| M46   | alpha-ketoglutarate*                                                | Amino Acid   | Glutamate Metabolism                                         | 1916   | 144 | 0.80 | -0.32 | 0.0018 | 0.0123 |
| M228  | vanillic alcohol sulfate                                            | Amino Acid   | Tyrosine Metabolism                                          | 1808   | 233 | 0.22 | -2.21 | 0.0019 | 0.0125 |
| M3474 | glycochenodeoxycholate 3-sulfate                                    | Lipid        | Primary Bile Acid Metabolism                                 | 4820   | 264 | 2.53 | 1.34  | 0.0019 | 0.0126 |
| M353  | isovalerylglycine                                                   | Amino Acid   | Leucine, Isoleucine and Valine Metabolism                    | 1950   | 158 | 0.55 | -0.87 | 0.0020 | 0.0129 |
| M72   | 3-methylhistidine                                                   | Amino Acid   | Histidine Metabolism                                         | 2670   | 170 | 0.57 | -0.80 | 0.0021 | 0.0132 |
| M3108 | lignoceroyl sphingomyelin (d18:1/24:0)                              | Lipid        | Sphingomyelins                                               | 3437   | 816 | 0.85 | -0.24 | 0.0020 | 0.0132 |
| M35   | N-carbamoylalanine                                                  | Amino Acid   | Alanine and Aspartate Metabolism                             | 950    | 133 | 0.52 | -0.95 | 0.0021 | 0.0132 |
| M2715 | 1-linoleyl-GPG (18:2)*                                              | Lipid        | Lysophospholipid                                             | 5516   | 507 | 0.82 | -0.29 | 0.0021 | 0.0133 |
| M3361 | androstenediol (3beta,17beta) monosulfate (2)                       | Lipid        | Androgenic Steroids                                          | 4500   | 369 | 0.54 | -0.90 | 0.0021 | 0.0134 |
| M2842 | glycerol 3-phosphate                                                | Lipid        | Glycerolipid Metabolism                                      | 580    | 173 | 0.71 | -0.49 | 0.0021 | 0.0134 |
| M3082 | glycosyl ceramide (d18:2/24:1, d18:1/24:2)*                         | Lipid        | Hexosylceramides (HCER)                                      | 3380   | 809 | 0.64 | -0.64 | 0.0022 | 0.0134 |
| M3389 | Salpha-androstan-3beta,17alpha-diol disulfate                       | Lipid        | Androgenic Steroids                                          | 4215   | 225 | 0.41 | -1.30 | 0.0022 | 0.0134 |
| M4594 | 1-methylurate                                                       | Xenobiotics  | Xanthine Metabolism                                          | 1900   | 181 | 0.50 | -0.99 | 0.0022 | 0.0137 |
| M576  | cysteinylglycine                                                    | Amino Acid   | Glutathione Metabolism                                       | 2132   | 179 | 1.68 | 0.75  | 0.0022 | 0.0137 |
| M1866 | stearoylcarntine (C18)                                              | Lipid        | Fatty Acid Metabolism (Acyl Carnitine, Long Chain Saturated) | 1485   | 428 | 0.71 | -0.50 | 0.0023 | 0.0141 |
| M175  | 4-hydroxyphenylpyruvate                                             | Amino Acid   | Tyrosine Metabolism                                          | 1690   | 179 | 0.70 | -0.51 | 0.0025 | 0.0148 |
| M2905 | palmitoyl-oleoyl-glycerol (16:0/18:1) [2]*                          | Lipid        | Diacylglycerol                                               | 3695   | 613 | 0.74 | -0.43 | 0.0025 | 0.0151 |
| M3259 | pregnenediol sulfate (C21H34O5S)*                                   | Lipid        | Pregnenolone Steroids                                        | 5000   | 397 | 1.73 | 0.79  | 0.0025 | 0.0151 |
| M5374 | 4-acetamidophenol                                                   | Xenobiotics  | Drug - Analgesics, Anesthetics                               | 2173.7 | 150 | 3.23 | 1.69  | 0.0026 | 0.0154 |
| M1165 | DSGEGDFXAEGGGVR*                                                    | Peptide      | Fibrinogen Cleavage Peptide                                  | 2535   | 731 | 1.41 | 0.50  | 0.0026 | 0.0154 |
| M6435 | GlcNAc sulfate conjugate of C21H34O2 steroid                        | PCM          | PCM                                                          | 4336.7 | 300 | 2.59 | 1.38  | 0.0026 | 0.0154 |
| M4604 | 5-acetylamino-6-formylamino-3-methyluracil                          | Xenobiotics  | Xanthine Metabolism                                          | 1424   | 225 | 0.57 | -0.82 | 0.0027 | 0.0159 |
| M3519 | tauroursodeoxycholic acid sulfate (1)                               | Lipid        | Secondary Bile Acid Metabolism                               | 4325   | 289 | 3.19 | 1.67  | 0.0028 | 0.0161 |
| M462  | cystine                                                             | Amino Acid   | Methionine, Cysteine, SAM and Taurine Metabolism             | 3424   | 239 | 0.86 | -0.22 | 0.0029 | 0.0161 |
| M2889 | diacylglycerol (16:1/18:2 [2], 16:0/18:3 [1])*                      | Lipid        | Diacylglycerol                                               | 2733   | 609 | 0.73 | -0.45 | 0.0028 | 0.0161 |
| M4206 | dihydroxoorotate                                                    | Nucleotide   | Pyrimidine Metabolism, Orotate containing                    | 1910   | 157 | 0.40 | -1.32 | 0.0028 | 0.0161 |
| M4933 | homostachydrine*                                                    | Xenobiotics  | Food Component/Plant                                         | 1750   | 158 | 0.57 | -0.80 | 0.0029 | 0.0162 |
| M461  | cysteine s-sulfate                                                  | Amino Acid   | Methionine, Cysteine, SAM and Taurine Metabolism             | 640.9  | 200 | 0.88 | -0.18 | 0.0030 | 0.0168 |
| M2010 | 16-hydroxypalmitate                                                 | Lipid        | Fatty Acid, Monohydroxy                                      | 5236.2 | 271 | 0.77 | -0.37 | 0.0030 | 0.0169 |
| M93   | 1-methyl-5-imidazolelactate                                         | Amino Acid   | Histidine Metabolism                                         | 1011   | 169 | 0.57 | -0.80 | 0.0033 | 0.0176 |
| M2670 | 2-stearoyl-GPE (18:0)*                                              | Lipid        | Lysophospholipid                                             | 6350   | 480 | 0.75 | -0.42 | 0.0032 | 0.0176 |
| M5377 | 4-acetaminophen sulfate                                             | Xenobiotics  | Drug - Analgesics, Anesthetics                               | 1792   | 230 | 2.58 | 1.37  | 0.0033 | 0.0176 |
| M1805 | hexanoylglycine (C6)                                                | Lipid        | Fatty Acid Metabolism (Acyl Glycine)                         | 2900   | 172 | 2.25 | 1.17  | 0.0032 | 0.0176 |
| M336  | N-acetylleucine                                                     | Amino Acid   | Leucine, Isoleucine and Valine Metabolism                    | 2400   | 172 | 0.73 | -0.46 | 0.0032 | 0.0176 |
| M2556 | 1-stearoyl-2-arachidonoyl-GPI (18:0/20:4)                           | Lipid        | Phosphatidylinositol (PI)                                    | 3000   | 905 | 0.84 | -0.26 | 0.0034 | 0.0177 |
| M4772 | 2,3-dihydroxyisovalerate                                            | Xenobiotics  | Food Component/Plant                                         | 1050   | 133 | 0.43 | -1.21 | 0.0033 | 0.0177 |
| M4182 | guanosine                                                           | Nucleotide   | Purine Metabolism, Guanine containing                        | 1728   | 284 | 0.48 | -1.06 | 0.0034 | 0.0177 |
| M471  | taurine                                                             | Amino Acid   | Methionine, Cysteine, SAM and Taurine Metabolism             | 660    | 126 | 0.80 | -0.33 | 0.0033 | 0.0177 |
| M491  | 2-oxoarginine*                                                      | Amino Acid   | Urea cycle; Arginine and Proline Metabolism                  | 1760   | 174 | 0.67 | -0.58 | 0.0034 | 0.0178 |
| M3262 | pregnenetriol disulfate*                                            | Lipid        | Pregnenolone Steroids                                        | 3504   | 246 | 1.64 | 0.71  | 0.0035 | 0.0180 |
| M131  | pipelate                                                            | Amino Acid   | Lysine Metabolism                                            | 2200   | 130 | 0.64 | -0.65 | 0.0035 | 0.0183 |
| M1166 | ADpSGEGDFXAEGGGVR*                                                  | Peptide      | Fibrinogen Cleavage Peptide                                  | 2016   | 807 | 1.53 | 0.61  | 0.0036 | 0.0186 |
| M3104 | hydroxypalmitoyl sphingomyelin (d18:1/16:0(OH))                     | Lipid        | Sphingomyelins                                               | 2056   | 720 | 1.19 | 0.25  | 0.0037 | 0.0187 |
| M6261 | dibutyl sulfosuccinate                                              | Xenobiotics  | Chemical                                                     | 3557   | 309 | 0.40 | -1.31 | 0.0039 | 0.0197 |
| M3063 | glycosyl-N-nervonoyl-sphingosine (d18:1/24:1)*                      | Lipid        | Hexosylceramides (HCER)                                      | 3990   | 811 | 0.56 | -0.84 | 0.0039 | 0.0197 |
| M307  | indoleacetylglutamine                                               | Amino Acid   | Tryptophan Metabolism                                        | 2185   | 304 | 0.47 | -1.10 | 0.0041 | 0.0204 |
| M3081 | glycosyl ceramide (d18:1/23:1, d17:1/24:1)*                         | Lipid        | Hexosylceramides (HCER)                                      | 3667   | 797 | 0.49 | -1.04 | 0.0041 | 0.0204 |
| M270  | N-acetylknurenine (2)                                               | Amino Acid   | Tryptophan Metabolism                                        | 2378   | 249 | 0.60 | -0.75 | 0.0042 | 0.0209 |
| M513  | hydroxyproline                                                      | Amino Acid   | Urea cycle; Arginine and Proline Metabolism                  | 1064   | 132 | 0.79 | -0.34 | 0.0048 | 0.0236 |
| M423  | 3-methyl-2-oxobutyrate                                              | Amino Acid   | Leucine, Isoleucine and Valine Metabolism                    | 1465   | 115 | 1.13 | 0.18  | 0.0052 | 0.0255 |
| M123  | 2-aminoadipate                                                      | Amino Acid   | Lysine Metabolism                                            | 3500   | 160 | 0.80 | -0.32 | 0.0055 | 0.0267 |
| M1781 | hexanoylglutamine                                                   | Lipid        | Fatty Acid Metabolism (Acyl Glutamine)                       | 2780   | 243 | 1.50 | 0.59  | 0.0055 | 0.0268 |
| M460  | S-carboxyethylcysteine                                              | Amino Acid   | Methionine, Cysteine, SAM and Taurine Metabolism             | 1785   | 194 | 0.67 | -0.58 | 0.0057 | 0.0275 |
| M1702 | eicosanedioate (C20-DC)                                             | Lipid        | Fatty Acid, Dicarboxylate                                    | 5200.9 | 341 | 0.72 | -0.48 | 0.0059 | 0.0284 |
| M298  | indolelactate                                                       | Amino Acid   | Tryptophan Metabolism                                        | 2286   | 204 | 0.77 | -0.38 | 0.0060 | 0.0285 |
| M1880 | cis-4-decenoylcarntine (C10:1)                                      | Lipid        | Fatty Acid Metabolism (Acyl Carnitine, Monounsaturated)      | 1057   | 314 | 1.66 | 0.73  | 0.0061 | 0.0292 |
| M5961 | 2,6-dihydroxybenzoic acid                                           | Xenobiotics  | Drug - Topical Agents                                        | 2575   | 153 | 0.47 | -1.10 | 0.0063 | 0.0297 |
| M1500 | 10-undecenoate (11:1n1)                                             | Lipid        | Medium Chain Fatty Acid                                      | 5085.8 | 183 | 1.50 | 0.58  | 0.0065 | 0.0299 |
| M181  | 3-(4-hydroxyphenyl)lactate (HPLA)                                   | Amino Acid   | Tyrosine Metabolism                                          | 1379   | 181 | 0.81 | -0.31 | 0.0065 | 0.0299 |
| M5378 | 4-acetamidophenylglucuronide                                        | Xenobiotics  | Drug - Analgesics, Anesthetics                               | 1400   | 326 | 2.01 | 1.01  | 0.0065 | 0.0299 |
| M639  | gamma-glutamylleucine                                               | Peptide      | Gamma-glutamyl Amino Acid                                    | 1685   | 259 | 0.83 | -0.26 | 0.0065 | 0.0299 |
| M4462 | hippurate                                                           | Xenobiotics  | Benzoate Metabolism                                          | 2106.9 | 178 | 0.49 | -1.03 | 0.0064 | 0.0299 |
| M1865 | margarylcarntine (C17)*                                             | Lipid        | Fatty Acid Metabolism (Acyl Carnitine, Long Chain Saturated) | 1424   | 414 | 0.70 | -0.51 | 0.0064 | 0.0299 |
| M2201 | myo-inositol                                                        | Lipid        | Inositol Metabolism                                          | 3506.3 | 225 | 0.68 | -0.56 | 0.0067 | 0.0308 |
| M1881 | undecenoylcarntine (C11:1)                                          | Lipid        | Fatty Acid Metabolism (Acyl Carnitine, Monounsaturated)      | 1069   | 328 | 1.57 | 0.65  | 0.0070 | 0.0320 |
| M1277 | arabitol/xylitol                                                    | Carbohydrate | Pentose Metabolism                                           | 1932.4 | 151 | 0.83 | -0.27 | 0.0071 | 0.0321 |
| M5381 | 2-methoxyacetaminophen glucuronide*                                 | Xenobiotics  | Drug - Analgesics, Anesthetics                               | 1633   | 356 | 2.23 | 1.16  | 0.0073 | 0.0328 |
| M1867 | arachidoylcarntine (C20*)                                           | Lipid        | Fatty Acid Metabolism (Acyl Carnitine, Long Chain Saturated) | 1512   | 456 | 0.64 | -0.65 | 0.0075 | 0.0331 |
| M3472 | glycochenodeoxycholate glucuronide (1)                              | Lipid        | Primary Bile Acid Metabolism                                 | 4806   | 312 | 1.67 | 0.74  | 0.0075 | 0.0331 |
| M3087 | lactosyl-N-palmitoyl-sphingosine (d18:1/16:0)                       | Lipid        | Lactosylceramides (LCER)                                     | 2527   | 863 | 0.62 | -0.68 | 0.0074 | 0.0331 |
| M6154 | ectoine                                                             | Xenobiotics  | Chemical                                                     | 1980   | 143 | 0.65 | -0.62 | 0.0076 | 0.0336 |
| M2266 | 1-myristoyl-2-arachidonoyl-GPC (14:0/20:4)*                         | Lipid        | Phosphatidylcholine (PC)                                     | 1950   | 755 | 0.70 | -0.51 | 0.0077 | 0.0337 |
| M3541 | taurochenodeoxycholic acid 3-sulfate                                | Lipid        | Secondary Bile Acid Metabolism                               | 4809   | 289 | 3.63 | 1.86  | 0.0077 | 0.0337 |
| M485  | urea                                                                | Amino Acid   | Urea cycle; Arginine and Proline Metabolism                  | 700    | 121 | 0.80 | -0.32 | 0.0082 | 0.0355 |
| M1944 | oleoylcholine                                                       | Lipid        | Fatty Acid Metabolism (Acyl Choline)                         | 1449   | 368 | 0.72 | -0.48 | 0.0085 | 0.0367 |
| M1882 | 5-dodecenoylcarntine (C12:1)                                        | Lipid        | Fatty Acid Metabolism (Acyl Carnitine, Monounsaturated)      | 1135   | 342 | 1.35 | 0.43  | 0.0085 | 0.0367 |
| M5249 | 2-acetamidophenol sulfate                                           | Xenobiotics  | Food Component/Plant                                         | 2251   | 230 | 0.51 | -0.98 | 0.0088 | 0.0379 |
| M5250 | 2-aminophenol sulfate                                               | Xenobiotics  | Food Component/Plant                                         | 1677   | 188 | 0.42 | -1.27 | 0.0091 | 0.0390 |
| M2408 | 1-palmitoyl-2-oleoyl-GPE (16:0/18:1)                                | Lipid        | Phosphatidylethanolamine (PE)                                | 2600   | 719 | 1.30 | 0.38  | 0.0093 | 0.0396 |
| M5151 | trans-3,4-methyleneheptanoate                                       | Xenobiotics  | Food Component/Plant                                         | 3807   | 141 | 1.32 | 0.40  | 0.0094 | 0.0397 |
| M3260 | pregnen-diol disulfate*                                             | Lipid        | Pregnenolone Steroids                                        | 3868   | 238 | 1.46 | 0.55  | 0.0098 | 0.0412 |
| M447  | 5-methylthioribose                                                  | Amino Acid   | Methionine, Cysteine, SAM and Taurine Metabolism             | 790    | 181 | 1.15 | 0.20  | 0.0103 | 0.0429 |
| M2904 | palmitoyl-oleoyl-glycerol (16:0/18:1) [1]*                          | Lipid        | Diacylglycerol                                               | 3562   | 613 | 0.76 | -0.39 | 0.0103 | 0.0429 |
| M1976 | 2-hydroxymervonate*                                                 | Lipid        | Fatty Acid, Monohydroxy                                      | 6345   | 381 | 1.22 | 0.29  | 0.0105 | 0.0437 |
| M83   | imidazole lactate                                                   | Amino Acid   | Histidine Metabolism                                         | 2040   | 157 | 0.84 | -0.25 | 0.0107 | 0.0440 |
| M2999 | 3-ketosphinganine                                                   | Lipid        | Sphingolipid Synthesis                                       | 1400   | 300 | 0.22 | -2.18 | 0.0107 | 0.0440 |
| M6431 | branched-chain, straight-chain, or cyclopropyl 10:1 fatty acid (2)* | PCM          | PCM                                                          | 4853   | 369 | 1.44 | 0.52  | 0.0108 | 0.0443 |
| M3535 | glycocholate sulfate*                                               | Lipid        | Secondary Bile Acid Metabolism                               | 4750   | 255 | 2.42 | 1.2   |        |        |

|       |                                                                 |                        |                                                              |        |     |      |       |          |        |
|-------|-----------------------------------------------------------------|------------------------|--------------------------------------------------------------|--------|-----|------|-------|----------|--------|
| M494  | homocitrulline                                                  | Amino Acid             | Urea cycle; Arginine and Proline Metabolism                  | 789    | 188 | 0.66 | -0.59 | 0.0117   | 0.0471 |
| M3536 | taurochenolate sulfate*                                         | Lipid                  | Secondary Bile Acid Metabolism                               | 4750   | 280 | 3.22 | 1.69  | 0.0126   | 0.0505 |
| M4174 | N6-succinyladenosine                                            | Nucleotide             | Purine Metabolism, Adenine containing                        | 940    | 382 | 0.64 | -0.64 | 0.0130   | 0.0517 |
| M5005 | pipereine                                                       | Xenobiotics            | Food Component/Plant                                         | 1168   | 286 | 0.48 | -1.05 | 0.0130   | 0.0517 |
| M5088 | 4-allylphenol sulfate                                           | Xenobiotics            | Food Component/Plant                                         | 3805   | 213 | 0.49 | -1.04 | 0.0135   | 0.0530 |
| M6423 | pentose acid*                                                   | PCM                    | PCM                                                          | 2180   | 165 | 0.59 | -0.76 | 0.0135   | 0.0530 |
| M2438 | 1-stearoyl-2-arachidonoyl-GPE (18:0/20:4)                       | Lipid                  | Phosphatidylethanolamine (PE)                                | 2475   | 769 | 1.21 | 0.28  | 0.0137   | 0.0535 |
| M2442 | 1-stearoyl-2-docosahexaenoyl-GPE (18:0/22:6)*                   | Lipid                  | Phosphatidylethanolamine (PE)                                | 2375   | 793 | 1.27 | 0.35  | 0.0138   | 0.0535 |
| M3090 | lactosyl-N-behenoyl-sphingosine (d18:1/22:0)*                   | Lipid                  | Lactosylceramides (LCER)                                     | 3842   | 947 | 0.80 | -0.32 | 0.0138   | 0.0535 |
| M473  | N-acetyltaurine                                                 | Amino Acid             | Methionine, Cysteine, SAM and Taurine Metabolism             | 800    | 166 | 0.68 | -0.55 | 0.0139   | 0.0536 |
| M3281 | Salpha-pregnan-diol disulfate                                   | Lipid                  | Progestin Steroids                                           | 4310   | 239 | 2.02 | 1.02  | 0.0140   | 0.0539 |
| M6235 | 6-hydroxyindole sulfate                                         | Xenobiotics            | Chemical                                                     | 2498   | 212 | 0.55 | -0.88 | 0.0140   | 0.0539 |
| M545  | spermidine                                                      | Amino Acid             | Polymamine Metabolism                                        | 3355   | 146 | 0.53 | -0.90 | 0.0145   | 0.0553 |
| M3477 | glycocholate sulfate                                            | Lipid                  | Primary Bile Acid Metabolism                                 | 4560   | 272 | 3.79 | 1.92  | 0.0145   | 0.0553 |
| M3048 | ceramide (d18:1/17:0, d17:1/18:0)*                              | Lipid                  | Ceramides                                                    | 3553   | 553 | 1.29 | 0.37  | 0.0151   | 0.0570 |
| M3360 | androstenediol (3beta,17beta) monosulfate (1)                   | Lipid                  | Androgenic Steroids                                          | 4535   | 369 | 1.61 | 0.69  | 0.0153   | 0.0577 |
| M2418 | 1-palmitoyl-2-docosahexaenoyl-GPE (16:0/22:6)*                  | Lipid                  | Phosphatidylethanolamine (PE)                                | 2160   | 765 | 1.25 | 0.32  | 0.0156   | 0.0586 |
| M107  | N6-acetyllysine                                                 | Amino Acid             | Lysine Metabolism                                            | 1059   | 187 | 0.76 | -0.39 | 0.0157   | 0.0586 |
| M4336 | pantothenate (Vitamin B5)                                       | Cofactors and Vitamins | Pantothenate and CoA Metabolism                              | 1498.7 | 218 | 0.81 | -0.31 | 0.0158   | 0.0589 |
| M483  | arginine                                                        | Amino Acid             | Urea cycle; Arginine and Proline Metabolism                  | 2825   | 175 | 0.88 | -0.18 | 0.0160   | 0.0592 |
| M3131 | sphingomyelin (d18:1/25:0, d19:0/24:1, d20:1/23:0, d19:1/24:0)* | Lipid                  | Sphingomyelins                                               | 3500   | 830 | 0.82 | -0.28 | 0.0165   | 0.0607 |
| M3107 | tricosanoyl sphingomyelin (d18:1/23:0)*                         | Lipid                  | Sphingomyelins                                               | 3350   | 802 | 0.84 | -0.25 | 0.0164   | 0.0607 |
| M434  | methionine                                                      | Amino Acid             | Methionine, Cysteine, SAM and Taurine Metabolism             | 2526   | 150 | 0.83 | -0.28 | 0.0168   | 0.0617 |
| M4431 | carotene diol (1)                                               | Cofactors and Vitamins | Vitamin A Metabolism                                         | 1720   | 568 | 0.76 | -0.40 | 0.0172   | 0.0628 |
| M426  | isobutyrylcarnitine (C4)                                        | Amino Acid             | Leucine, Isoleucine and Valine Metabolism                    | 2810   | 232 | 0.70 | -0.51 | 0.0176   | 0.0636 |
| M4591 | paraxanthine                                                    | Xenobiotics            | Xanthine Metabolism                                          | 2279   | 179 | 0.58 | -0.80 | 0.0176   | 0.0636 |
| M1869 | lignoceroylcarnitine (C24)*                                     | Lipid                  | Fatty Acid Metabolism (Acyl Carnitine, Long Chain Saturated) | 1603   | 512 | 0.80 | -0.31 | 0.0178   | 0.0636 |
| M4241 | N-acetyl-beta-alanine                                           | Nucleotide             | Pyrimidine Metabolism, Uracil containing                     | 773    | 130 | 0.71 | -0.48 | 0.0177   | 0.0636 |
| M163  | N-acetyltyrosine                                                | Amino Acid             | Tyrosine Metabolism                                          | 1680   | 222 | 0.78 | -0.35 | 0.0177   | 0.0636 |
| M2425 | 1-stearoyl-2-oleoyl-GPE (18:0/18:1)                             | Lipid                  | Phosphatidylethanolamine (PE)                                | 2950   | 747 | 1.31 | 0.39  | 0.0179   | 0.0638 |
| M322  | 3-indoxyl sulfate                                               | Amino Acid             | Tryptophan Metabolism                                        | 2222.2 | 212 | 0.55 | -0.86 | 0.0180   | 0.0638 |
| M5017 | sulfate of piperine metabolite C16H19NO3 (2)*                   | Xenobiotics            | Food Component/Plant                                         | 4112   | 352 | 0.54 | -0.88 | 0.0182   | 0.0645 |
| M5218 | vanillic acid glycine                                           | Xenobiotics            | Food Component/Plant                                         | 1682   | 224 | 0.26 | -1.93 | 0.0185   | 0.0650 |
| M4636 | 2-piperidinone                                                  | Xenobiotics            | Food Component/Plant                                         | 1675   | 100 | 0.40 | -1.34 | 0.0187   | 0.0652 |
| M522  | argininate*                                                     | Amino Acid             | Urea cycle; Arginine and Proline Metabolism                  | 2150   | 176 | 0.75 | -0.42 | 0.0186   | 0.0652 |
| M1947 | dihomo-linolenoyl-choline                                       | Lipid                  | Fatty Acid Metabolism (Acyl Choline)                         | 1424   | 392 | 0.64 | -0.65 | 0.0187   | 0.0652 |
| M5505 | metronidazole                                                   | Xenobiotics            | Drug - Antibiotic                                            | 4666   | 172 | 3.37 | 1.75  | 0.0189   | 0.0657 |
| M3310 | tetrahydrocortisol glucuronide                                  | Lipid                  | Corticosteroids                                              | 4666   | 541 | 1.58 | 0.66  | 0.0193   | 0.0665 |
| M1948 | linoleoylcholine*                                               | Lipid                  | Fatty Acid Metabolism (Acyl Choline)                         | 1388   | 366 | 0.74 | -0.43 | 0.0195   | 0.0670 |
| M1220 | 1,5-anhydroglucitol (1,5-AG)                                    | Carbohydrate           | Glycolysis, Gluconeogenesis, and Pyruvate Metabolism         | 802    | 163 | 0.75 | -0.42 | 0.0202   | 0.0688 |
| M4348 | ascorbic acid 2-sulfate                                         | Cofactors and Vitamins | Ascorbate and Aldarate Metabolism                            | 3042   | 255 | 0.83 | -0.27 | 0.0204   | 0.0688 |
| M1864 | palmitoylcarnitine (C16)                                        | Lipid                  | Fatty Acid Metabolism (Acyl Carnitine, Long Chain Saturated) | 1425   | 400 | 0.82 | -0.28 | 0.0202   | 0.0688 |
| M1943 | palmitoylcholine                                                | Lipid                  | Fatty Acid Metabolism (Acyl Choline)                         | 1482   | 342 | 0.76 | -0.40 | 0.0203   | 0.0688 |
| M6241 | perfluorooctanoate (PFOA)                                       | Xenobiotics            | Chemical                                                     | 5130   | 413 | 0.79 | -0.35 | 0.0203   | 0.0688 |
| M3305 | cortisol                                                        | Lipid                  | Corticosteroids                                              | 4710   | 361 | 1.47 | 0.55  | 0.0206   | 0.0691 |
| M1468 | phosphate                                                       | Energy                 | Oxidative Phosphorylation                                    | 576    | 99  | 0.78 | -0.35 | 0.0206   | 0.0691 |
| M2711 | 1-stearoyl-GPG (18:0)                                           | Lipid                  | Lysophospholipid                                             | 5816   | 511 | 0.33 | -1.61 | 0.0213   | 0.0711 |
| M1884 | myristoleoylcarnitine (C14:1)*                                  | Lipid                  | Fatty Acid Metabolism (Acyl Carnitine, Monounsaturated)      | 1316   | 370 | 1.33 | 0.41  | 0.0214   | 0.0711 |
| M3025 | N-stearoyl-sphingosine (d18:1/18:0)*                            | Lipid                  | Ceramides                                                    | 3392   | 567 | 1.25 | 0.33  | 0.0214   | 0.0711 |
| M140  | phenylalanine                                                   | Amino Acid             | Phenylalanine Metabolism                                     | 2878   | 166 | 1.13 | 0.18  | 0.0224   | 0.0740 |
| M1448 | succinate                                                       | Energy                 | TCA Cycle                                                    | 3149   | 117 | 0.86 | -0.23 | 0.0226   | 0.0745 |
| M437  | N-formylmethionine                                              | Amino Acid             | Methionine, Cysteine, SAM and Taurine Metabolism             | 1543.8 | 176 | 0.85 | -0.23 | 0.0229   | 0.0751 |
| M11   | N-acetylserine                                                  | Amino Acid             | Glycine, Serine and Threonine Metabolism                     | 2000   | 146 | 0.73 | -0.46 | 0.0235   | 0.0768 |
| M4597 | 1,7-dimethylurate                                               | Xenobiotics            | Xanthine Metabolism                                          | 1578.6 | 195 | 0.56 | -0.85 | 0.0239   | 0.0779 |
| M245  | thyroxine                                                       | Amino Acid             | Tyrosine Metabolism                                          | 4808   | 776 | 0.85 | -0.23 | 0.0240   | 0.0779 |
| M2725 | 1-linoleoyl-GPI* (18:2)*                                        | Lipid                  | Lysophospholipid                                             | 5494   | 595 | 1.19 | 0.25  | 0.0243   | 0.0786 |
| M5514 | flucanazole                                                     | Xenobiotics            | Drug - Antibiotic                                            | 836    | 351 | 0.52 | -0.95 | 0.0247   | 0.0797 |
| M1161 | Fibrinopeptide A (3-16)                                         | Peptide                | Fibrinogen Cleavage Peptide                                  | 2786   | 674 | 1.30 | 0.38  | 0.0261   | 0.0836 |
| M351  | isovalerate (C5)                                                | Amino Acid             | Leucine, Isoleucine and Valine Metabolism                    | 1564   | 101 | 0.81 | -0.30 | 0.0261   | 0.0836 |
| M5    | sarcosine                                                       | Amino Acid             | Glycine, Serine and Threonine Metabolism                     | 1280   | 90  | 0.75 | -0.42 | 0.0263   | 0.0840 |
| M2802 | 1-(1-enyl-palmitoyl)-2-palmitoyl-GPC (P-16:0/16:0)*             | Lipid                  | Plasmalogen                                                  | 2550   | 719 | 0.73 | -0.45 | 0.0266   | 0.0846 |
| M1406 | glucuronate                                                     | Carbohydrate           | Aminosugar Metabolism                                        | 3233.3 | 193 | 1.70 | 0.76  | 0.0267   | 0.0846 |
| M219  | gentisate                                                       | Amino Acid             | Tyrosine Metabolism                                          | 905    | 153 | 0.50 | -1.00 | 0.0272   | 0.0859 |
| M80   | imidazole propionate                                            | Amino Acid             | Histidine Metabolism                                         | 2263   | 141 | 2.69 | 1.43  | 0.0275   | 0.0863 |
| M1951 | docosahexaenoylcholine                                          | Lipid                  | Fatty Acid Metabolism (Acyl Choline)                         | 1378   | 414 | 0.73 | 0.46  | 0.0276   | 0.0865 |
| M3009 | N-palmitoyl-sphinganine (d18:0/16:0)                            | Lipid                  | Dihydroceramides                                             | 3090   | 541 | 1.20 | 0.27  | 0.0278   | 0.0867 |
| M2850 | 1-pentadecanoylglycerol (15:0)                                  | Lipid                  | Monooacylglycerol                                            | 6200   | 241 | 0.58 | -0.79 | 0.0282   | 0.0868 |
| M2669 | 1-stearoyl-GPE (18:0)                                           | Lipid                  | Lysophospholipid                                             | 1626   | 482 | 0.83 | -0.28 | 0.0279   | 0.0868 |
| M2871 | 2-oleoylglycerol (18:1)                                         | Lipid                  | Monooacylglycerol                                            | 6500   | 281 | 0.59 | -0.77 | 0.0281   | 0.0868 |
| M1936 | acetoacetate                                                    | Lipid                  | Ketone Bodies                                                | 1062   | 103 | 1.72 | 0.78  | 0.0282   | 0.0868 |
| M1283 | arabonate/xylonate                                              | Carbohydrate           | Pentose Metabolism                                           | 2700   | 165 | 0.76 | -0.39 | 0.0283   | 0.0870 |
| M2404 | 1,2-dipalmitoyl-GPE (16:0/16:0)*                                | Lipid                  | Phosphatidylethanolamine (PE)                                | 2498   | 693 | 1.46 | 0.55  | 0.0284   | 0.0870 |
| M1180 | Fibrinopeptide B (1-13)                                         | Peptide                | Fibrinogen Cleavage Peptide                                  | 2482   | 697 | 1.25 | 0.32  | 0.0286   | 0.0872 |
| M2848 | 1-myristoylglycerol (14:0)                                      | Lipid                  | Monooacylglycerol                                            | 6353.3 | 227 | 0.51 | -0.96 | 0.0294   | 0.0879 |
| M1971 | 2-hydroxystearate                                               | Lipid                  | Fatty Acid, Monohydroxy                                      | 5695   | 299 | 1.16 | 0.21  | 0.0290   | 0.0879 |
| M2233 | phosphocholine                                                  | Lipid                  | Phospholipid Metabolism                                      | 700    | 184 | 0.87 | -0.20 | 0.0293   | 0.0879 |
| M1567 | linoleate (18:2n6)                                              | Lipid                  | Long Chain Polyunsaturated Fatty Acid (n3 and n6)            | 5535   | 279 | 1.18 | 0.24  | 0.0294   | 0.0879 |
| M31   | N-acetylalanine                                                 | Amino Acid             | Alanine and Aspartate Metabolism                             | 1564.8 | 130 | 0.85 | -0.24 | 0.0293   | 0.0879 |
| M4552 | p-cresol sulfate                                                | Xenobiotics            | Benzoate Metabolism                                          | 2890   | 187 | 0.49 | -1.02 | 0.0291   | 0.0879 |
| M4357 | gulonate*                                                       | Cofactors and Vitamins | Ascorbate and Aldarate Metabolism                            | 2750   | 195 | 0.62 | -0.68 | 0.0300   | 0.0894 |
| M75   | N-acetyl-3-methylhistidine*                                     | Amino Acid             | Histidine Metabolism                                         | 2056   | 212 | 0.49 | -1.03 | 0.0306   | 0.0909 |
| M340  | 1-carboxyethylleucine                                           | Amino Acid             | Leucine, Isoleucine and Valine Metabolism                    | 2663   | 202 | 0.75 | -0.42 | 0.0313   | 0.0926 |
| M1543 | eicosenoate (20:1n9 or 1n11)                                    | Lipid                  | Long Chain Monounsaturated Fatty Acid                        | 5950   | 309 | 1.28 | 0.36  | 0.0323   | 0.0953 |
| M642  | gamma-glutamylmethionine                                        | Peptide                | Gamma-glutamyl Amino Acid                                    | 2640   | 279 | 0.78 | -0.36 | 0.0330   | 0.0970 |
| M1494 | caprate (10:0)                                                  | Lipid                  | Medium Chain Fatty Acid                                      | 5090.7 | 171 | 0.73 | -0.45 | 0.0336   | 0.0986 |
| M3401 | 11beta-hydroxyandrosterone glucuronide                          | Lipid                  | Androgenic Steroids                                          | 4209   | 481 | 1.48 | 0.57  | 0.0344   | 0.1006 |
| M1952 | arachidonoylcholine                                             | Lipid                  | Fatty Acid Metabolism (Acyl Choline)                         | 1390   | 390 | 0.76 | -0.39 | 0.0355   | 0.1031 |
| M645  | gamma-glutamyltryptophan                                        | Peptide                | Gamma-glutamyl Amino Acid                                    | 1960   | 332 | 0.80 | -0.33 | 0.0354   | 0.1031 |
| M1915 | suberoylcarnitine (C8-DC)                                       | Lipid                  | Fatty Acid Metabolism (Acyl Carnitine, Dicarboxylate)        | 2964   | 318 | 1.86 | 0.90  | 0.0365   | 0.1058 |
| M399  | 2-methylbutyrylglycine (C5)                                     | Amino Acid             | Leucine, Isoleucine and Valine Metabolism                    | 1884   | 158 | 0.69 | -0.53 | 0.0375   | 0.1082 |
| M1495 | cis-4-decenoate (10:1n6)*                                       | Lipid                  | Medium Chain Fatty Acid                                      | 4890   | 169 | 1.26 | 0.34  | 0.0381   | 0.1096 |
| M18   | N-acetylthreonine                                               | Amino Acid             | Glycine, Serine and Threonine Metabolism                     | 1700   | 160 | 0.82 | -0.29 | 0.0384   | 0.1101 |
| M4235 | 2'-deoxyuridine                                                 | Nucleotide             | Pyrimidine Metabolism, Uracil containing                     | 1100   | 273 | 0.47 | -1.08 | 0.0391   | 0.1110 |
| M4147 | adenine                                                         | Nucleotide             | Purine Metabolism, Adenine containing                        | 2221   | 136 | 1.23 | 0.29  | 0.0389   | 0.1110 |
| M3102 | sphingomyelin (d18:0/20:0, d16:0/22:0)*                         | Lipid                  | Dihydrosphingomyelins                                        | 2850   | 762 | 0.81 | -0.30 | 0.0390   | 0.1110 |
| M1418 | N-acetylneuraminate                                             | Carbohydrate           | Aminosugar Metabolism                                        | 660    | 310 | 0.88 | -0.18 | 0.0397   | 0.1125 |
| M1706 | hydroxy-CMPF*                                                   | Lipid                  | Fatty Acid, Dicarboxylate                                    | 1516   | 255 | 0.72 | -0.47 | 0.0404   | 0.1139 |
| M2924 | oleoyl-oleoyl-glycerol (18:1/18:1) [2]*                         | Lipid                  | Diacylglycerol                                               | 3695   | 639 | 0.81 | -0.31 | 0.0405   | 0.1139 |
| M1157 | ADSGEGDFAEGGVR*                                                 | Peptide                | Fibrinogen Cleavage Peptide                                  | 3350   | 769 | 1.44 | 0.52  | 0.0412   | 0.1157 |
| M5224 | ethyl beta-glucopyranoside                                      | Xenobiotics            | Food Component/Plant                                         | 1519   | 207 | 0.56 | -0.83 | 0.0416   | 0.1165 |
| M1490 | heptanoate (7:0)                                                | Lipid                  | Medium Chain Fatty Acid                                      | 3670   | 129 | 0.88 | -0.19 | 0.0422   | 0.1176 |
| M3192 | cholesterol                                                     | Lipid                  | Sterol                                                       | 2707   | 369 | 0.91 | -0.14 | 0.0425   | 0.1182 |
| M582  | 2-hydroxybutyrate/2-hydroxyisobutyrate                          | Amino Acid             | Glutathione Metabolism                                       | 1258   | 103 | 1.18 | 0.24  | 0.0431   | 0.1193 |
| M2803 | 1-(1-enyl-palmitoyl)-2-palmitoleoyl-GPC (P-16:0/16:1)*          | Lipid                  | Plasmalogen                                                  | 2218   | 717 | 0.78 | -0.36 | 0.0433   | 0.1197 |
| M2857 | 1-linolenoylglycerol (18:3)                                     | Lipid                  | Monooacylglycerol                                            | 6214   | 277 | 0.68 | -0.56 | 0.0439   | 0.1210 |
| M2923 | oleoyl-oleoyl-glycerol (18:1/18:1) [1]*                         | Lipid                  | Diacylglycerol                                               | 3571   | 639 | 0.84 | -0.25 | 0.0452   | 0.1242 |
| M4207 | orotate                                                         | Nucleotide             | Pyrimidine Metabolism, Orotate containing                    | 1638.1 | 155 | 0.41 | -1.29 | 0.0456   | 0.1247 |
| M97   | 4-imidazoleacetate                                              | Amino Acid             | Histidine Metabolism                                         | 2055   | 127 | 0.69 | -0.53 | 0.0459   | 0.1252 |
| M4221 | pseudouridine                                                   | Nucleotide             | Pyrimidine Metabolism, Uracil containing                     | 1100   | 243 | 0.83 | -0.27 | 0.0460   | 0.1253 |
| M4502 | 3-methyl catechol sulfate (1)                                   | Xenobiotics            | Benzoate Metabolism                                          | 2790   | 203 | 0.40 | -1.33 | 0.0467   | 0.1267 |
| M138  | N,N,N-trimethyl-5-aminovaleate                                  | Amino Acid             | Lysine Metabolism                                            | 2186   | 160 | 0.82 | -0.28 | 0.0469   | 0.1268 |
| M1889 | nervonoylcarnitine (C24:1)*                                     | Lipid                  | Fatty Acid Metabolism (Acyl Carnitine, Monounsaturated)      | 1602   | 510 | 0.70 | -0.51 | 0.0470   | 0.1269 |
| M1686 | dodecanedioate (C12)                                            | Lipid                  | Fatty Acid, Dicarboxylate                                    | 2990   | 229 | 0.62 | -0.69 | 0.0486   | 0.1306 |
| M332  | leucine                                                         | Amino Acid             | Leucine, Isoleucine and Valine Metabolism                    | 2864   | 132 | 0.92 | -0.12 | 0.0489   | 0.1311 |
| M4222 | 5,6-dihydrouridine                                              | Nucleotide             | Pyrimidine Metabolism, Uracil containing                     | 1119   | 245 | 0.79 | -0.34 | 0.0505   | 0.1346 |
| M58   | carboxyethyl-GABA                                               | Amino Acid             | Glutamate Metabolism                                         | 2085   | 176 | 0.81 | -0.30 | 0.0504   | 0.1346 |
| M424  | alpha-hydroxyisovalerate                                        | Amino Acid             | Leucine, Isoleucine and Valine Metabolism                    | 1052   | 117 | 1.18 | 0.24  | 0.0513</ |        |

|       |                                                               |                        |                                                         |        |     |      |       |        |        |
|-------|---------------------------------------------------------------|------------------------|---------------------------------------------------------|--------|-----|------|-------|--------|--------|
| M3057 | glycosyl-N-palmitoyl-sphingosine (d18:1/16:0)                 | Lipid                  | Hexosylceramides (HCEr)                                 | 2623   | 701 | 0.83 | -0.28 | 0.0515 | 0.1360 |
| M47   | N-acetylglutamate                                             | Amino Acid             | Glutamate Metabolism                                    | 1050   | 190 | 0.86 | -0.22 | 0.0516 | 0.1360 |
| M2806 | 1-(1-enyl-palmitoyl)-2-oleoyl-GPC (P-16:0/18:1)*              | Lipid                  | Plasmalogen                                             | 2550   | 745 | 0.88 | -0.18 | 0.0524 | 0.1378 |
| M77   | hydantoin-5-propionate                                        | Amino Acid             | Histidine Metabolism                                    | 2080   | 171 | 1.44 | 0.52  | 0.0527 | 0.1380 |
| M10   | serine                                                        | Amino Acid             | Glycine, Serine and Threonine Metabolism                | 1239   | 106 | 0.89 | -0.17 | 0.0530 | 0.1385 |
| M3021 | N-palmitoyl-sphingosine (d18:1/16:0)                          | Lipid                  | Ceramides                                               | 2893   | 539 | 1.16 | 0.21  | 0.0532 | 0.1386 |
| M3326 | cortolone glucuronide (1)                                     | Lipid                  | Corticosteroids                                         | 4600   | 541 | 1.36 | 0.45  | 0.0535 | 0.1389 |
| M1162 | Fibrinopeptide A (5-16)*                                      | Peptide                | Fibrinogen Cleavage Peptide                             | 2850   | 602 | 1.19 | 0.25  | 0.0542 | 0.1404 |
| M96   | 1-ribosyl-imidazoleacetate*                                   | Amino Acid             | Histidine Metabolism                                    | 2006   | 259 | 0.81 | -0.30 | 0.0553 | 0.1424 |
| M4224 | 5-methyluridine (ribothymidine)                               | Nucleotide             | Pyrimidine Metabolism, Uracil containing                | 1778.1 | 257 | 0.87 | -0.20 | 0.0555 | 0.1424 |
| M1695 | hexadecanedioate (C16)                                        | Lipid                  | Fatty Acid, Dicarboxylate                               | 4615   | 285 | 1.31 | 0.39  | 0.0552 | 0.1424 |
| M254  | tryptophan                                                    | Amino Acid             | Tryptophan Metabolism                                   | 2986   | 205 | 0.89 | -0.17 | 0.0559 | 0.1432 |
| M2172 | N-oleoyltaurine                                               | Lipid                  | Endocannabinoid                                         | 5610   | 388 | 0.73 | -0.45 | 0.0572 | 0.1461 |
| M498  | dimethylarginine (ADMA + SDMA)                                | Amino Acid             | Urea cycle; Arginine and Proline Metabolism             | 2850   | 203 | 0.76 | -0.39 | 0.0574 | 0.1462 |
| M1462 | citrateconate/glutaconate                                     | Energy                 | TCA Cycle                                               | 2600   | 129 | 0.68 | -0.56 | 0.0581 | 0.1472 |
| M3342 | epiandrosterone sulfate                                       | Lipid                  | Androgenic Steroids                                     | 4855   | 369 | 0.68 | -0.55 | 0.0583 | 0.1472 |
| M3159 | sphingosine                                                   | Lipid                  | Sphingosines                                            | 1393   | 300 | 0.42 | -1.26 | 0.0580 | 0.1472 |
| M3124 | sphingomyelin (d18:1/21:0, d17:1/22:0, d16:1/23:0)*           | Lipid                  | Sphingomyelins                                          | 3000   | 774 | 0.85 | -0.24 | 0.0585 | 0.1473 |
| M1540 | 10-nonadecenoate (19:1n9)                                     | Lipid                  | Long Chain Monounsaturated Fatty Acid                   | 5780   | 295 | 1.21 | 0.28  | 0.0590 | 0.1477 |
| M2238 | phosphoethanolamine (PE)                                      | Lipid                  | Phospholipid Metabolism                                 | 700    | 142 | 0.51 | -0.96 | 0.0590 | 0.1477 |
| M417  | N-acetylvaline                                                | Amino Acid             | Leucine, Isoleucine and Valine Metabolism               | 1704   | 158 | 0.85 | -0.23 | 0.0595 | 0.1485 |
| M4254 | 3-methylcytidine                                              | Nucleotide             | Pyrimidine Metabolism, Cytidine containing              | 2176   | 258 | 1.26 | 0.33  | 0.0609 | 0.1518 |
| M402  | tiglylglycine                                                 | Amino Acid             | Leucine, Isoleucine and Valine Metabolism               | 1926   | 158 | 0.72 | -0.48 | 0.0619 | 0.1537 |
| M137  | N,N-dimethyl-5-aminovalerate                                  | Amino Acid             | Lysine Metabolism                                       | 2290   | 146 | 0.49 | -1.02 | 0.0624 | 0.1547 |
| M1533 | oleate/vaccenate (18:1)                                       | Lipid                  | Long Chain Monounsaturated Fatty Acid                   | 5655   | 281 | 1.17 | 0.22  | 0.0628 | 0.1551 |
| M2587 | 1-linoleyl-GPA (18:2)*                                        | Lipid                  | Lysophospholipid                                        | 1550   | 435 | 0.77 | -0.38 | 0.0634 | 0.1558 |
| M5009 | glucuronide of piperine metabolite C17H21NO3 (4)*             | Xenobiotics            | Food Component/Plant                                    | 3992   | 462 | 0.61 | -0.71 | 0.0633 | 0.1558 |
| M3224 | campesterol                                                   | Lipid                  | Sterol                                                  | 2873   | 383 | 1.50 | 0.59  | 0.0641 | 0.1568 |
| M1570 | dihomolinoleate (20:2n6)                                      | Lipid                  | Long Chain Polyunsaturated Fatty Acid (n3 and n6)       | 5730   | 307 | 1.19 | 0.25  | 0.0642 | 0.1568 |
| M1974 | 2-hydroxybehenate                                             | Lipid                  | Fatty Acid, Monohydroxy                                 | 6384   | 355 | 1.13 | 0.17  | 0.0645 | 0.1571 |
| M263  | oxindolylalanine                                              | Amino Acid             | Tryptophan Metabolism                                   | 2756   | 221 | 0.82 | -0.29 | 0.0647 | 0.1571 |
| M2913 | palmitoyl-arachidonoyl-glycerol (16:0/20:4) [1]*              | Lipid                  | Diacylglycerol                                          | 2916   | 635 | 0.81 | -0.31 | 0.0648 | 0.1571 |
| M1547 | erucate (22:1n9)                                              | Lipid                  | Long Chain Monounsaturated Fatty Acid                   | 6355.6 | 337 | 1.20 | 0.26  | 0.0656 | 0.1587 |
| M4316 | 1-methylnicotinamide                                          | Cofactors and Vitamins | Nicotinate and Nicotinamide Metabolism                  | 1940   | 137 | 0.73 | -0.46 | 0.0666 | 0.1605 |
| M2851 | 1-palmitoylglycerol (16:0)                                    | Lipid                  | Monoacylglycerol                                        | 6550   | 255 | 0.75 | -0.41 | 0.0670 | 0.1611 |
| M3123 | sphingomyelin (d18:1/20:2, d18:2/20:1, d16:1/22:2)*           | Lipid                  | Sphingomyelins                                          | 2200   | 756 | 1.13 | 0.18  | 0.0674 | 0.1616 |
| M202  | vanillylmandelate (VMA)                                       | Amino Acid             | Tyrosine Metabolism                                     | 941    | 197 | 1.24 | 0.31  | 0.0681 | 0.1629 |
| M4785 | 3-formylindole                                                | Xenobiotics            | Food Component/Plant                                    | 2736   | 146 | 0.85 | -0.24 | 0.0689 | 0.1644 |
| M2852 | 1-palmitoylglycerol (16:1)*                                   | Lipid                  | Monoacylglycerol                                        | 6094   | 253 | 0.56 | -0.84 | 0.0702 | 0.1671 |
| M4505 | 4-methylcatechol sulfate                                      | Xenobiotics            | Benzoate Metabolism                                     | 2665   | 203 | 0.56 | -0.83 | 0.0710 | 0.1680 |
| M5410 | celecoxib                                                     | Xenobiotics            | Drug - Analgesics, Anesthetics                          | 5283   | 380 | 1.17 | 0.23  | 0.0709 | 0.1680 |
| M3209 | 3beta-hydroxy-5-cholestenoate                                 | Lipid                  | Sterol                                                  | 5398   | 415 | 1.31 | 0.39  | 0.0716 | 0.1691 |
| M2855 | 1-oleoylglycerol (18:1)                                       | Lipid                  | Monoacylglycerol                                        | 6650   | 281 | 0.66 | -0.60 | 0.0736 | 0.1728 |
| M1861 | laurylcarbitine (C12)                                         | Lipid                  | Fatty Acid Metabolism (Acyl Carnitine, Medium Chain)    | 1235   | 344 | 1.23 | 0.30  | 0.0735 | 0.1728 |
| M78   | trans-urocanate                                               | Amino Acid             | Histidine Metabolism                                    | 2285   | 139 | 4.47 | 2.16  | 0.0748 | 0.1753 |
| M3337 | dehydroepiandrosterone sulfate (DHEA-S)                       | Lipid                  | Androgenic Steroids                                     | 4745   | 367 | 1.36 | 0.44  | 0.0752 | 0.1758 |
| M2869 | 2-palmitoleylglycerol (16:1)*                                 | Lipid                  | Monoacylglycerol                                        | 6016   | 253 | 0.53 | -0.91 | 0.0758 | 0.1766 |
| M4938 | indolin-2-one                                                 | Xenobiotics            | Food Component/Plant                                    | 2575   | 134 | 0.67 | -0.57 | 0.0762 | 0.1772 |
| M4411 | biliverdin                                                    | Cofactors and Vitamins | Hemoglobin and Porphyrin Metabolism                     | 1016   | 583 | 1.33 | 0.41  | 0.0769 | 0.1775 |
| M1489 | caproate (6:0)                                                | Lipid                  | Medium Chain Fatty Acid                                 | 2713.7 | 115 | 0.89 | -0.17 | 0.0769 | 0.1775 |
| M4593 | theophylline                                                  | Xenobiotics            | Xanthine Metabolism                                     | 1870   | 181 | 0.71 | -0.50 | 0.0768 | 0.1775 |
| M3455 | taurocholate                                                  | Lipid                  | Primary Bile Acid Metabolism                            | 5150   | 514 | 1.86 | 0.90  | 0.0781 | 0.1797 |
| M1707 | 3-carboxy-4-methyl-5-pentyl-2-furanpropionate (3-CMPFP)       | Lipid                  | Fatty Acid, Dicarboxylate                               | 4000   | 267 | 0.80 | -0.33 | 0.0798 | 0.1831 |
| M1262 | ribitol                                                       | Carbohydrate           | Pentose Metabolism                                      | 1789.6 | 151 | 0.90 | -0.16 | 0.0807 | 0.1843 |
| M2938 | stearoyl-arachidonoyl-glycerol (18:0/20:4) [2]*               | Lipid                  | Diacylglycerol                                          | 3522   | 663 | 0.82 | -0.29 | 0.0806 | 0.1843 |
| M519  | N,N,N-trimethyl-alanylproline betaine (TMAP)                  | Amino Acid             | Urea cycle; Arginine and Proline Metabolism             | 2470   | 229 | 0.82 | -0.29 | 0.0818 | 0.1863 |
| M1690 | tridecenedioate (C13:1-DC)*                                   | Lipid                  | Fatty Acid, Dicarboxylate                               | 3051   | 241 | 1.27 | 0.35  | 0.0821 | 0.1865 |
| M3517 | glycoursoxodeoxycholic acid sulfate (1)                       | Lipid                  | Secondary Bile Acid Metabolism                          | 4309   | 264 | 1.89 | 0.92  | 0.0824 | 0.1868 |
| M3043 | N-palmitoyl-heptadecaspingosine (d17:1/16:0)*                 | Lipid                  | Ceramides                                               | 2645   | 525 | 1.18 | 0.24  | 0.0831 | 0.1880 |
| M81   | formiminoglutamate                                            | Amino Acid             | Histidine Metabolism                                    | 1880   | 175 | 1.27 | 0.34  | 0.0842 | 0.1888 |
| M638  | gamma-glutamylisoleucine*                                     | Peptide                | Gamma-glutamyl Amino Acid                               | 2940   | 261 | 0.85 | -0.23 | 0.0837 | 0.1888 |
| M4191 | N2-methylguanosine                                            | Nucleotide             | Purine Metabolism, Guanine containing                   | 1988   | 296 | 0.82 | -0.29 | 0.0840 | 0.1888 |
| M2914 | palmitoyl-arachidonoyl-glycerol (16:0/20:4) [2]*              | Lipid                  | Diacylglycerol                                          | 3015   | 635 | 0.80 | -0.32 | 0.0843 | 0.1888 |
| M4244 | 3-[3-amino-3-carboxypropyl]uridine*                           | Nucleotide             | Pyrimidine Metabolism, Uracil containing                | 13469  | 344 | 0.73 | -0.45 | 0.0848 | 0.1889 |
| M3101 | sphingomyelin (d18:0/18:0, d19:0/17:0)*                       | Lipid                  | Dihydroxy-sphingomyelins                                | 2500   | 734 | 0.84 | -0.25 | 0.0848 | 0.1889 |
| M6213 | 4-hydroxychlorothalonil                                       | Xenobiotics            | Chemical                                                | 4427   | 245 | 0.86 | -0.22 | 0.0850 | 0.1890 |
| M1979 | 3-hydroxyhexanoate                                            | Lipid                  | Fatty Acid, Monohydroxy                                 | 1725   | 131 | 1.22 | 0.28  | 0.0853 | 0.1891 |
| M79   | cis-urocanate                                                 | Amino Acid             | Histidine Metabolism                                    | 1200   | 137 | 2.33 | 1.22  | 0.0860 | 0.1901 |
| M5736 | ondansetron                                                   | Xenobiotics            | Drug - Gastrointestinal                                 | 3301   | 294 | 1.90 | 0.93  | 0.0867 | 0.1909 |
| M5077 | thymol sulfate                                                | Xenobiotics            | Food Component/Plant                                    | 4410   | 229 | 0.32 | -1.65 | 0.0867 | 0.1909 |
| M3248 | 17alpha-hydroxypregnanolone glucuronide                       | Lipid                  | Pregnenolone Steroids                                   | 5071.9 | 509 | 1.29 | 0.37  | 0.0878 | 0.1928 |
| M299  | indoleacetate                                                 | Amino Acid             | Tryptophan Metabolism                                   | 2200   | 174 | 0.72 | -0.47 | 0.0889 | 0.1946 |
| M109  | N2-acetyl,N6-methyllysine                                     | Amino Acid             | Lysine Metabolism                                       | 2168   | 203 | 0.60 | -0.73 | 0.0894 | 0.1953 |
| M2872 | 2-linoleylglycerol (18:2)                                     | Lipid                  | Monoacylglycerol                                        | 6250   | 279 | 0.73 | -0.45 | 0.0904 | 0.1971 |
| M6418 | glycine conjugate of C10H14O2 (1)*                            | PCM                    | PCM                                                     | 4335   | 222 | 1.29 | 0.37  | 0.0911 | 0.1982 |
| M6    | dimethylglycine                                               | Amino Acid             | Glycine, Serine and Threonine Metabolism                | 1104   | 104 | 0.84 | -0.25 | 0.0931 | 0.2019 |
| M1887 | eicosenoylcarbitine (C20:1)*                                  | Lipid                  | Fatty Acid Metabolism (Acyl Carnitine, Monounsaturated) | 1484   | 454 | 0.79 | -0.33 | 0.0936 | 0.2023 |
| M2940 | oleoyl-arachidonoyl-glycerol (18:1/20:4) [2]*                 | Lipid                  | Diacylglycerol                                          | 2990   | 661 | 0.83 | -0.28 | 0.0937 | 0.2023 |
| M1178 | Fibrinopeptide B (1-11)                                       | Peptide                | Fibrinogen Cleavage Peptide                             | 2389   | 411 | 1.26 | 0.33  | 0.0943 | 0.2032 |
| M2931 | linoleoyl-linoleyl-glycerol (18:2/18:2) [1]*                  | Lipid                  | Diacylglycerol                                          | 2720   | 635 | 1.58 | 0.66  | 0.0959 | 0.2060 |
| M5090 | methyl glucopyranoside (alpha + beta)                         | Xenobiotics            | Food Component/Plant                                    | 1070   | 193 | 0.68 | -0.56 | 0.0970 | 0.2075 |
| M3490 | taurodeoxycholic acid 3-sulfate                               | Lipid                  | Secondary Bile Acid Metabolism                          | 4850   | 289 | 1.70 | 0.77  | 0.0969 | 0.2075 |
| M1372 | galactonate                                                   | Carbohydrate           | Fructose, Mannose and Galactose Metabolism              | 3085   | 195 | 0.64 | -0.64 | 0.0997 | 0.2128 |
| M1938 | 3-hydroxybutyrate (BHBA)                                      | Lipid                  | Ketone Bodies                                           | 1480   | 103 | 1.49 | 0.57  | 0.1004 | 0.2138 |
| M387  | N-acetylisoleucine                                            | Amino Acid             | Leucine, Isoleucine and Valine Metabolism               | 2325   | 172 | 0.82 | -0.29 | 0.1010 | 0.2146 |
| M3031 | N-palmitoyl-sphingadienine (d18:2/16:0)*                      | Lipid                  | Ceramides                                               | 2490   | 537 | 1.12 | 0.16  | 0.1030 | 0.2183 |
| M201  | vanillate                                                     | Amino Acid             | Tyrosine Metabolism                                     | 1625   | 211 | 0.83 | -0.27 | 0.1034 | 0.2185 |
| M2281 | 1-palmitoyl-2-stearoyl-GPC (16:0/18:0)                        | Lipid                  | Phosphatidylcholine (PC)                                | 2750   | 763 | 0.60 | -0.74 | 0.1046 | 0.2204 |
| M455  | cysteine                                                      | Amino Acid             | Methionine, Cysteine, SAM and Taurine Metabolism        | 1475   | 122 | 1.16 | 0.21  | 0.1047 | 0.2204 |
| M4780 | 2-isopropylmalate                                             | Xenobiotics            | Food Component/Plant                                    | 2605   | 175 | 0.64 | -0.64 | 0.1062 | 0.2229 |
| M1517 | arachidate (20:0)                                             | Lipid                  | Long Chain Saturated Fatty Acid                         | 6240   | 311 | 1.16 | 0.22  | 0.1072 | 0.2246 |
| M4376 | delta-CEHC                                                    | Cofactors and Vitamins | Tocopherol Metabolism                                   | 3422   | 249 | 1.61 | 0.68  | 0.1076 | 0.2249 |
| M573  | cysteine-glutathione disulfide                                | Amino Acid             | Glutathione Metabolism                                  | 2465   | 427 | 0.56 | -0.83 | 0.1079 | 0.2249 |
| M4893 | ergothioneine                                                 | Xenobiotics            | Food Component/Plant                                    | 850    | 230 | 1.57 | 0.65  | 0.1086 | 0.2260 |
| M2856 | 1-linoleylglycerol (18:2)                                     | Lipid                  | Monoacylglycerol                                        | 6477   | 279 | 0.74 | -0.43 | 0.1091 | 0.2265 |
| M2241 | glycerophosphoserine*                                         | Lipid                  | Phospholipid Metabolism                                 | 577    | 260 | 0.82 | -0.28 | 0.1109 | 0.2297 |
| M3112 | sphingomyelin (d17:1/14:0, d16:1/15:0)*                       | Lipid                  | Sphingomyelins                                          | 1950   | 662 | 0.84 | -0.26 | 0.1115 | 0.2304 |
| M6175 | 2-naphthol sulfate                                            | Xenobiotics            | Chemical                                                | 3658   | 223 | 0.77 | -0.37 | 0.1130 | 0.2323 |
| M1837 | picolinoylglycine                                             | Lipid                  | Fatty Acid Metabolism (Acyl Glycine)                    | 1945   | 181 | 0.82 | -0.29 | 0.1128 | 0.2323 |
| M5738 | diphenoxylate                                                 | Xenobiotics            | Drug - Gastrointestinal                                 | 1093   | 453 | 1.43 | 0.52  | 0.1133 | 0.2326 |
| M2293 | 1-palmitoyl-2-dihomo-linolenoyl-GPC (16:0/20:3n3 or 6)*       | Lipid                  | Phosphatidylcholine (PC)                                | 2285   | 785 | 0.94 | -0.09 | 0.1151 | 0.2356 |
| M3208 | 3beta,7alpha-dihydroxy-5-cholestenoate                        | Lipid                  | Sterol                                                  | 5275   | 431 | 1.12 | 0.16  | 0.1159 | 0.2368 |
| M3221 | beta-sitosterol                                               | Lipid                  | Sterol                                                  | 3054   | 397 | 1.75 | 0.80  | 0.1169 | 0.2382 |
| M1932 | carnitine                                                     | Lipid                  | Carnitine Metabolism                                    | 1978   | 162 | 0.89 | -0.17 | 0.1194 | 0.2428 |
| M2937 | stearoyl-arachidonoyl-glycerol (18:0/20:4) [1]*               | Lipid                  | Diacylglycerol                                          | 3404   | 663 | 0.87 | -0.20 | 0.1200 | 0.2435 |
| M3271 | Salpha-pregnan-3beta,20beta-diol monosulfate (1)              | Lipid                  | Progesterin Steroids                                    | 5180   | 399 | 1.40 | 0.49  | 0.1210 | 0.2446 |
| M115  | N6,N6-dimethyllysine                                          | Amino Acid             | Lysine Metabolism                                       | 2831   | 175 | 0.63 | -0.67 | 0.1213 | 0.2446 |
| M4584 | 2-methoxyhydroquinone sulfate (1)                             | Xenobiotics            | Benzoate Metabolism                                     | 1505   | 219 | 0.66 | -0.60 | 0.1214 | 0.2446 |
| M1704 | docosadioate (C22-DC)                                         | Lipid                  | Fatty Acid, Dicarboxylate                               | 5291.8 | 369 | 0.84 | -0.25 | 0.1225 | 0.2459 |
| M3128 | sphingomyelin (d18:2/23:0, d18:1/23:1, d17:1/24:1)*           | Lipid                  | Sphingomyelins                                          | 3000   | 800 | 0.90 | -0.15 | 0.1225 | 0.2459 |
| M2868 | 2-palmitoylglycerol (16:0)                                    | Lipid                  | Monoacylglycerol                                        | 6400   | 255 | 0.77 | -0.37 | 0.1252 | 0.2494 |
| M3253 | 21-hydroxypregnenolone disulfate                              | Lipid                  | Pregnenolone Steroids                                   | 3935   | 245 | 1.23 | 0.29  | 0.1257 | 0.2494 |
| M3050 | ceramide (d18:1/20:0, d16:1/22:0, d20:1/18:0)*                | Lipid                  | Ceramides                                               | 3920   | 595 | 1.12 | 0.16  | 0.1251 | 0.2494 |
| M3064 | glycosyl-N-(2-hydroxynerononyl)-sphingosine (d18:1/24:1/20H)* | Lipid                  | Hexosylceramides (HCEr)                                 | 3839   | 827 | 0.81 | -0.31 | 0.1247 | 0.2494 |
| M55   | N-acetyl-aspartyl-glutamate (NAAG)                            | Amino Acid             | Glutamate Metabolism                                    | 1035   | 305 | 1.21 | 0.27  | 0.1256 | 0.2494 |
| M4119 | inosine                                                       | Nucleotide             | Purine Metabolism, (Hypo)Xanthine/Inosine containing    | 1602.1 | 267 | 0.60 | -0.74 | 0.1265 | 0.     |

|       |                                                                     |                        |                                                       |        |     |      |       |        |        |
|-------|---------------------------------------------------------------------|------------------------|-------------------------------------------------------|--------|-----|------|-------|--------|--------|
| M375  | 3-methylglutaryl carnitine (2)                                      | Amino Acid             | Leucine, Isoleucine and Valine Metabolism             | 2687   | 290 | 0.79 | -0.35 | 0.1277 | 0.2509 |
| M4931 | histidine betaine (herycine)*                                       | Xenobiotics            | Food Component/Plant                                  | 2094   | 198 | 1.40 | 0.48  | 0.1280 | 0.2509 |
| M1512 | margarate (17:0)                                                    | Lipid                  | Long Chain Saturated Fatty Acid                       | 5731   | 269 | 1.15 | 0.20  | 0.1271 | 0.2509 |
| M116  | N6,N6,N6-trimethyllysine                                            | Amino Acid             | Lysine Metabolism                                     | 2825   | 189 | 0.86 | -0.22 | 0.1290 | 0.2521 |
| M2447 | 1-oleoyl-2-arachidonoyl-GPE (18:1/20:4)*                            | Lipid                  | Phosphatidylethanolamine (PE)                         | 2200   | 767 | 1.14 | 0.19  | 0.1303 | 0.2537 |
| M3100 | behenoyl dihydrosphingomyelin (d18:0/22:0)*                         | Lipid                  | Dihydrosphingomyelins                                 | 3300   | 790 | 0.87 | -0.20 | 0.1301 | 0.2537 |
| M2037 | 3,4-dihydroxybutyrate                                               | Lipid                  | Fatty Acid, Dihydroxy                                 | 2204   | 119 | 0.87 | -0.20 | 0.1313 | 0.2540 |
| M3098 | myristoyl dihydrosphingomyelin (d18:0/14:0)*                        | Lipid                  | Dihydrosphingomyelins                                 | 2060   | 678 | 0.87 | -0.21 | 0.1316 | 0.2540 |
| M3462 | taurochenodeoxycholate                                              | Lipid                  | Primary Bile Acid Metabolism                          | 5250   | 498 | 1.47 | 0.56  | 0.1316 | 0.2540 |
| M226  | tyramine O-sulfate                                                  | Amino Acid             | Tyrosine Metabolism                                   | 1565   | 216 | 1.85 | 0.88  | 0.1316 | 0.2540 |
| M1472 | malonate                                                            | Lipid                  | Fatty Acid Synthesis                                  | 3447   | 103 | 0.92 | -0.12 | 0.1325 | 0.2551 |
| M5203 | caffeic acid sulfate                                                | Xenobiotics            | Food Component/Plant                                  | 1307   | 259 | 0.47 | -1.09 | 0.1327 | 0.2551 |
| M1516 | nonadecanoate (19:0)                                                | Lipid                  | Long Chain Saturated Fatty Acid                       | 6068   | 297 | 1.12 | 0.17  | 0.1330 | 0.2551 |
| M327  | 6-bromotryptophan                                                   | Amino Acid             | Tryptophan Metabolism                                 | 3371   | 283 | 0.70 | -0.52 | 0.1336 | 0.2557 |
| M76   | N-acetyl-L-methylhistidine*                                         | Amino Acid             | Histidine Metabolism                                  | 2100   | 212 | 0.65 | -0.63 | 0.1346 | 0.2570 |
| M139  | N-acetyl-2-aminoadipate                                             | Amino Acid             | Lysine Metabolism                                     | 1374   | 204 | 0.86 | -0.21 | 0.1348 | 0.2570 |
| M1772 | propionylglycine (C3)                                               | Lipid                  | Fatty Acid Metabolism (also BCAA Metabolism)          | 960    | 130 | 0.75 | -0.42 | 0.1370 | 0.2605 |
| M2939 | oleoyl-arachidonoyl-glycerol (18:1/20:4) [1]*                       | Lipid                  | Diacylglycerol                                        | 2907   | 661 | 0.85 | -0.23 | 0.1377 | 0.2612 |
| M1844 | hexanoyl carnitine (C6)                                             | Lipid                  | Fatty Acid Metabolism (Acyl Carnitine, Medium Chain)  | 3358   | 260 | 1.15 | 0.20  | 0.1389 | 0.2631 |
| M3000 | sphinganine                                                         | Lipid                  | Sphingolipid Synthesis                                | 1413   | 302 | 0.49 | -1.03 | 0.1394 | 0.2635 |
| M1709 | 2-hydroxysebacate                                                   | Lipid                  | Fatty Acid, Dicarboxylate                             | 1324   | 217 | 0.78 | -0.35 | 0.1412 | 0.2663 |
| M3453 | cholate                                                             | Lipid                  | Primary Bile Acid Metabolism                          | 5165   | 407 | 2.14 | 1.10  | 0.1422 | 0.2675 |
| M6177 | 2,4-di-tert-butylphenol                                             | Xenobiotics            | Chemical                                              | 5749   | 205 | 0.92 | -0.12 | 0.1427 | 0.2680 |
| M2310 | 1-palmitoleyl-2-linolenoyl-GPC (16:1/18:3)*                         | Lipid                  | Phosphatidylcholine (PC)                              | 1900   | 755 | 0.85 | -0.23 | 0.1467 | 0.2743 |
| M4300 | quinolate                                                           | Cofactors and Vitamins | Nicotinate and Nicotinamide Metabolism                | 845    | 168 | 0.82 | -0.29 | 0.1466 | 0.2743 |
| M2242 | glycerophosphoinositol*                                             | Lipid                  | Phospholipid Metabolism                               | 516    | 335 | 1.13 | 0.17  | 0.1470 | 0.2744 |
| M1688 | dodecenedioate (C12:1-DC)*                                          | Lipid                  | Fatty Acid, Dicarboxylate                             | 2700   | 227 | 0.82 | -0.29 | 0.1490 | 0.2775 |
| M1959 | 2-hydroxyheptanoate*                                                | Lipid                  | Fatty Acid, Monohydroxy                               | 925    | 145 | 1.19 | 0.26  | 0.1502 | 0.2791 |
| M2031 | 9,10-DIHOME                                                         | Lipid                  | Fatty Acid, Dihydroxy                                 | 5180   | 313 | 1.54 | 0.63  | 0.1513 | 0.2807 |
| M1569 | linolenate (18:3n3 or 3n6)                                          | Lipid                  | Long Chain Polyunsaturated Fatty Acid (n3 and n6)     | 5450   | 277 | 1.14 | 0.20  | 0.1526 | 0.2826 |
| M4470 | 4-hydroxyhippurate                                                  | Xenobiotics            | Benzoate Metabolism                                   | 1475   | 194 | 0.70 | -0.52 | 0.1538 | 0.2836 |
| M272  | kynurenate                                                          | Amino Acid             | Tryptophan Metabolism                                 | 2224   | 188 | 0.87 | -0.20 | 0.1538 | 0.2836 |
| M4325 | N1-Methyl-4-pyridone-3-carboxamide                                  | Cofactors and Vitamins | Nicotinate and Nicotinamide Metabolism                | 1260   | 153 | 0.66 | -0.59 | 0.1541 | 0.2836 |
| M3379 | Salpha-androstan-3alpha,17beta-diol monosulfate (2)                 | Lipid                  | Androgenic Steroids                                   | 5080   | 371 | 0.73 | -0.46 | 0.1562 | 0.2869 |
| M1177 | Fibrinopeptide B (1-9)                                              | Peptide                | Fibrinogen Cleavage Peptide                           | 1669   | 473 | 1.39 | 0.47  | 0.1589 | 0.2913 |
| M1671 | maleate                                                             | Lipid                  | Fatty Acid, Dicarboxylate                             | 2640   | 115 | 1.52 | 0.61  | 0.1594 | 0.2915 |
| M1460 | 2-methylcitrate/homocitrate                                         | Energy                 | TCA Cycle                                             | 575    | 205 | 1.10 | 0.14  | 0.1601 | 0.2919 |
| M2    | N-acetyl glycine                                                    | Amino Acid             | Glycine, Serine and Threonine Metabolism              | 826    | 118 | 1.15 | 0.25  | 0.1602 | 0.2919 |
| M453  | cystathionine                                                       | Amino Acid             | Methionine, Cysteine, SAM and Taurine Metabolism      | 2270   | 223 | 1.15 | 0.63  | 0.1608 | 0.2921 |
| M4805 | glucuronate                                                         | Xenobiotics            | Food Component/Plant                                  | 2922   | 195 | 0.62 | -0.69 | 0.1623 | 0.2921 |
| M1243 | glycerate                                                           | Carbohydrate           | Glycolysis, Gluconeogenesis, and Pyruvate Metabolism  | 2070.4 | 105 | 0.93 | -0.11 | 0.1621 | 0.2921 |
| M3032 | N-stearoyl-sphingadenine (d18:2/18:0)*                              | Lipid                  | Ceramides                                             | 2846   | 565 | 1.12 | 0.16  | 0.1623 | 0.2921 |
| M5959 | salicylate                                                          | Xenobiotics            | Drug - Topical Agents                                 | 802    | 137 | 0.37 | -1.44 | 0.1611 | 0.2921 |
| M3113 | sphingomyelin (d18:1/14:0, d16:1/16:0)*                             | Lipid                  | Sphingomyelins                                        | 1998   | 676 | 0.91 | -0.13 | 0.1619 | 0.2921 |
| M5936 | diphenhydramine                                                     | Xenobiotics            | Drug - Respiratory                                    | 911    | 256 | 3.42 | 1.77  | 0.1637 | 0.2941 |
| M2002 | 9-hydroxystearate                                                   | Lipid                  | Fatty Acid, Monohydroxy                               | 5384   | 299 | 0.83 | -0.28 | 0.1642 | 0.2943 |
| M1814 | cis-3,4-methyleneheptanoyl glycine                                  | Lipid                  | Fatty Acid Metabolism (Acyl Glycine)                  | 3731   | 198 | 1.26 | 0.34  | 0.1645 | 0.2943 |
| M3012 | N-stearoyl-sphinganine (d18:0/18:0)*                                | Lipid                  | Dihydroceramides                                      | 3526   | 569 | 1.20 | 0.26  | 0.1655 | 0.2955 |
| M6430 | branched-chain, straight-chain, or cyclopropyl 10:1 fatty acid (1)* | PCM                    | PCM                                                   | 4805   | 169 | 1.29 | 0.37  | 0.1674 | 0.2983 |
| M180  | 4-hydroxyphenylacetoyl carnitine                                    | Amino Acid             | Tyrosine Metabolism                                   | 2730   | 296 | 1.50 | 0.58  | 0.1707 | 0.3030 |
| M1219 | N,N-dimethyl-pro-pro                                                | Peptide                | Modified Peptides                                     | 2500   | 241 | 0.85 | -0.24 | 0.1710 | 0.3030 |
| M4905 | quinate                                                             | Xenobiotics            | Food Component/Plant                                  | 2432.9 | 191 | 0.65 | -0.63 | 0.1705 | 0.3030 |
| M1325 | sucrose                                                             | Carbohydrate           | Disaccharides and Oligosaccharides                    | 865    | 341 | 0.50 | -1.00 | 0.1765 | 0.3121 |
| M1519 | behenate (22:0)*                                                    | Lipid                  | Long Chain Saturated Fatty Acid                       | 6745   | 339 | 0.87 | -0.20 | 0.1772 | 0.3128 |
| M2429 | 1-stearoyl-2-linoleoyl-GPE (18:0/18:2)*                             | Lipid                  | Phosphatidylethanolamine (PE)                         | 2575   | 745 | 1.14 | 0.19  | 0.1784 | 0.3142 |
| M1771 | propionyl carnitine (C3)                                            | Lipid                  | Fatty Acid Metabolism (also BCAA Metabolism)          | 2590   | 218 | 0.86 | -0.22 | 0.1821 | 0.3202 |
| M5210 | (S)-a-amino-omega-caprolactam                                       | Xenobiotics            | Food Component/Plant                                  | 2378   | 129 | 0.91 | -0.14 | 0.1838 | 0.3225 |
| M354  | isovaleryl carnitine (C5)                                           | Amino Acid             | Leucine, Isoleucine and Valine Metabolism             | 3085   | 246 | 0.85 | -0.23 | 0.1845 | 0.3232 |
| M1557 | stearidonate (18:4n3)                                               | Lipid                  | Long Chain Polyunsaturated Fatty Acid (n3 and n6)     | 5395   | 275 | 0.82 | -0.29 | 0.1853 | 0.3240 |
| M71   | 1-methylhistidine                                                   | Amino Acid             | Histidine Metabolism                                  | 2755   | 170 | 0.86 | -0.22 | 0.1871 | 0.3253 |
| M1679 | azelate (C9-DC)                                                     | Lipid                  | Fatty Acid, Dicarboxylate                             | 1276   | 187 | 0.82 | -0.29 | 0.1872 | 0.3253 |
| M4369 | gamma-CEHC glucuronide*                                             | Cofactors and Vitamins | Tocopherol Metabolism                                 | 2500   | 439 | 1.40 | 0.49  | 0.1867 | 0.3253 |
| M580  | 2-aminobutyrate                                                     | Amino Acid             | Glutathione Metabolism                                | 2059   | 104 | 0.90 | -0.15 | 0.1915 | 0.3319 |
| M4963 | methyl indole-3-acetate                                             | Xenobiotics            | Food Component/Plant                                  | 3380   | 190 | 0.72 | -0.48 | 0.1917 | 0.3319 |
| M1187 | phenylacetyl glutamine                                              | Peptide                | Acetylated Peptides                                   | 2330   | 263 | 0.77 | 0.38  | 0.1924 | 0.3324 |
| M551  | acisoga                                                             | Amino Acid             | Polyamine Metabolism                                  | 2297   | 183 | 0.66 | -0.60 | 0.1947 | 0.3357 |
| M2911 | palmitoleyl-linoleoyl-glycerol (16:1/18:2) [1]*                     | Lipid                  | Diacylglycerol                                        | 2664   | 609 | 0.82 | -0.29 | 0.1950 | 0.3357 |
| M4409 | bilirubin (E,E)*                                                    | Cofactors and Vitamins | Hemoglobin and Porphyrin Metabolism                   | 1045   | 585 | 0.86 | -0.22 | 0.1966 | 0.3365 |
| M1577 | docosadenoate (22:2n6)                                              | Lipid                  | Long Chain Polyunsaturated Fatty Acid (n3 and n6)     | 6034   | 335 | 1.11 | 0.15  | 0.1960 | 0.3365 |
| M23   | O-acetylhomoserine                                                  | Amino Acid             | Glycine, Serine and Threonine Metabolism              | 1850   | 160 | 0.03 | -5.06 | 0.1963 | 0.3365 |
| M4139 | AMP                                                                 | Nucleotide             | Purine Metabolism, Adenine containing                 | 1013   | 348 | 1.05 | 0.07  | 0.1972 | 0.3369 |
| M1907 | adipoyl carnitine (C6-DC)                                           | Lipid                  | Fatty Acid Metabolism (Acyl Carnitine, Dicarboxylate) | 2570   | 290 | 1.31 | 0.39  | 0.1989 | 0.3388 |
| M4437 | retinal                                                             | Cofactors and Vitamins | Vitamin A Metabolism                                  | 1666   | 285 | 0.77 | -0.37 | 0.1990 | 0.3388 |
| M159  | 4-hydroxyphenylacetate                                              | Amino Acid             | Phenylalanine Metabolism                              | 1361   | 151 | 1.48 | 0.57  | 0.2010 | 0.3415 |
| M1447 | succinyl carnitine (C4-DC)                                          | Energy                 | TCA Cycle                                             | 2291   | 262 | 1.16 | 0.21  | 0.2037 | 0.3454 |
| M1514 | stearate (18:0)                                                     | Lipid                  | Long Chain Saturated Fatty Acid                       | 5872   | 283 | 1.08 | 0.12  | 0.2064 | 0.3495 |
| M1750 | 2-aminoheptanoate                                                   | Lipid                  | Fatty Acid, Amino                                     | 3160   | 146 | 0.87 | -0.20 | 0.2076 | 0.3508 |
| M1756 | N-acetyl-2-aminooctanoate*                                          | Lipid                  | Fatty Acid, Amino                                     | 3943   | 200 | 0.78 | -0.36 | 0.2090 | 0.3525 |
| M1502 | laurate (12:0)                                                      | Lipid                  | Medium Chain Fatty Acid                               | 5300   | 199 | 0.81 | -0.30 | 0.2099 | 0.3534 |
| M2416 | 1-palmitoyl-2-arachidonoyl-GPE (16:0/20:4)*                         | Lipid                  | Phosphatidylethanolamine (PE)                         | 2250   | 741 | 1.10 | 0.14  | 0.2146 | 0.3606 |
| M3120 | sphingomyelin (d18:1/19:0, d19:1/18:0)*                             | Lipid                  | Sphingomyelins                                        | 2550   | 746 | 0.91 | -0.13 | 0.2154 | 0.3613 |
| M4283 | 3-aminoisobutyrate                                                  | Nucleotide             | Pyrimidine Metabolism, Thymine containing             | 2190   | 104 | 0.61 | -0.72 | 0.2173 | 0.3638 |
| M634  | gamma-glutamyl glutamate                                            | Peptide                | Gamma-glutamyl Amino Acid                             | 1775   | 277 | 0.82 | -0.29 | 0.2218 | 0.3706 |
| M395  | 2-hydroxy-3-methylvalerate                                          | Amino Acid             | Leucine, Isoleucine and Valine Metabolism             | 1800   | 131 | 1.17 | 0.22  | 0.2265 | 0.3764 |
| M1441 | aconitate [cis or trans]                                            | Energy                 | TCA Cycle                                             | 580    | 173 | 1.10 | 0.14  | 0.2262 | 0.3764 |
| M2162 | palmitoyl ethanolamide                                              | Lipid                  | Endocannabinoid                                       | 6300   | 298 | 1.07 | 0.10  | 0.2262 | 0.3764 |
| M508  | N-delta-acetylornithine                                             | Amino Acid             | Urea cycle; Arginine and Proline Metabolism           | 858    | 173 | 0.79 | -0.34 | 0.2269 | 0.3764 |
| M1968 | 2-hydroxypalmitate                                                  | Lipid                  | Fatty Acid, Monohydroxy                               | 5511.2 | 271 | 1.07 | 0.10  | 0.2297 | 0.3802 |
| M2243 | trimethylamine N-oxide                                              | Lipid                  | Phospholipid Metabolism                               | 2100   | 76  | 0.66 | -0.59 | 0.2311 | 0.3820 |
| M4382 | gamma-tocopherol/beta-tocopherol                                    | Cofactors and Vitamins | Tocopherol Metabolism                                 | 2384   | 416 | 1.17 | 0.23  | 0.2320 | 0.3827 |
| M3129 | sphingomyelin (d18:1/24:1, d18:2/24:0)*                             | Lipid                  | Sphingomyelins                                        | 3200   | 814 | 1.06 | 0.09  | 0.2334 | 0.3843 |
| M3307 | cortisol 21-sulfate                                                 | Lipid                  | Corticosteroids                                       | 4330   | 441 | 1.72 | 0.78  | 0.2372 | 0.3898 |
| M2932 | linoleoyl-linoleoyl-glycerol (18:2/18:2) [2]*                       | Lipid                  | Diacylglycerol                                        | 2790   | 635 | 1.25 | 0.33  | 0.2378 | 0.3902 |
| M4559 | o-cresol sulfate                                                    | Xenobiotics            | Benzoate Metabolism                                   | 2796   | 187 | 0.84 | -0.25 | 0.2398 | 0.3928 |
| M1189 | 4-hydroxyphenylacetyl glutamine                                     | Peptide                | Acetylated Peptides                                   | 1650   | 279 | 1.63 | 0.70  | 0.2469 | 0.4033 |
| M3167 | hexadecaphosphingosine (d16:1)*                                     | Lipid                  | Sphingosines                                          | 1289   | 272 | 0.55 | -0.87 | 0.2471 | 0.4033 |
| M4525 | 4-vinylphenol sulfate                                               | Xenobiotics            | Benzoate Metabolism                                   | 3320   | 199 | 0.63 | -0.67 | 0.2487 | 0.4051 |
| M1572 | dihomolinalenate (20:3n3 or 3n6)                                    | Lipid                  | Long Chain Polyunsaturated Fatty Acid (n3 and n6)     | 5596   | 305 | 1.11 | 0.16  | 0.2496 | 0.4052 |
| M3540 | glycodeoxycholate 3-sulfate                                         | Lipid                  | Secondary Bile Acid Metabolism                        | 4875   | 264 | 1.39 | 0.48  | 0.2493 | 0.4052 |
| M363  | beta-hydroxyisovalerate                                             | Amino Acid             | Leucine, Isoleucine and Valine Metabolism             | 1027   | 117 | 1.13 | 0.18  | 0.2513 | 0.4064 |
| M1931 | deoxycarnitine                                                      | Lipid                  | Carnitine Metabolism                                  | 2052   | 146 | 0.90 | -0.14 | 0.2512 | 0.4064 |
| M1918 | octadecenedioly carnitine (C18:1-DC)*                               | Lipid                  | Fatty Acid Metabolism (Acyl Carnitine, Dicarboxylate) | 1180   | 456 | 1.25 | 0.33  | 0.2534 | 0.4091 |
| M1823 | N-palmitoyl glycine                                                 | Lipid                  | Fatty Acid Metabolism (Acyl Glycine)                  | 5580   | 312 | 0.91 | -0.14 | 0.2549 | 0.4108 |
| M347  | alpha-hydroxyisocaproate                                            | Amino Acid             | Leucine, Isoleucine and Valine Metabolism             | 1840   | 131 | 0.92 | -0.12 | 0.2558 | 0.4115 |
| M1958 | alpha-hydroxycaproate                                               | Lipid                  | Fatty Acid, Monohydroxy                               | 1920   | 131 | 1.38 | 0.47  | 0.2574 | 0.4134 |
| M3121 | sphingomyelin (d18:1/20:0, d16:1/22:0)*                             | Lipid                  | Sphingomyelins                                        | 2800   | 760 | 0.95 | -0.08 | 0.2580 | 0.4136 |
| M1433 | N-acetylglucosamine/N-acetyl galactosamine                          | Carbohydrate           | Aminosugar Metabolism                                 | 715    | 222 | 1.07 | 0.09  | 0.2594 | 0.4151 |
| M44   | glutamate                                                           | Amino Acid             | Glutamate Metabolism                                  | 1500   | 148 | 0.90 | -0.15 | 0.2604 | 0.4153 |
| M6400 | glutamine conjugate of C6H10O2 (2)*                                 | PCM                    | PCM                                                   | 2526   | 241 | 1.27 | 0.34  | 0.2600 | 0.4153 |
| M538  | N-acetylputrescine                                                  | Amino Acid             | Polyamine Metabolism                                  | 2230   | 131 | 1.15 | 0.20  | 0.2621 | 0.4172 |
| M1643 | cis-3,4-methyleneheptanoate                                         | Lipid                  | Fatty Acid, Branched                                  | 3679   | 141 | 1.12 | 0.16  | 0.2642 | 0.4199 |
| M4895 | erythritol                                                          | Xenobiotics            | Food Component/Plant                                  | 1491   | 167 | 0.91 | -0.14 | 0.2695 | 0.4268 |
| M410  | methylsuccinate                                                     | Amino Acid             | Leucine, Isoleucine and Valine Metabolism             | 2800   | 131 | 0.88 | -0.19 | 0.2695 | 0.4268 |
| M2454 | 1-linoleoyl-2-arachidonoyl-GPE (18:2/20:4)*                         | Lipid                  | Phosphatidylethanolamine (PE)                         | 2080   | 765 | 0.87 | -0.20 | 0.2729 | 0.4314 |
| M3297 | corticosterone                                                      | Lipid                  | Corticosteroids                                       | 5040   | 345 | 1.22 | 0.29  | 0.2749 | 0.4330 |
| M4959 | mannonate*                                                          | Xenobiotics            | Food Component/Plant                                  | 2736   | 195 | 1.10 | 0.14  | 0.2747 | 0.4330 |
| M405  | 3-hydroxy-2-ethylpropionate                                         | Amino Acid             | Leucine, Isoleucine and Valine Metabolism             | 975    | 117 | 0.90 | -0.15 | 0.2791 | 0.4389 |
| M4256 |                                                                     |                        |                                                       |        |     |      |       |        |        |

|       |                                                     |                        |                                                         |        |     |      |       |        |        |
|-------|-----------------------------------------------------|------------------------|---------------------------------------------------------|--------|-----|------|-------|--------|--------|
| M1566 | hexadecadienoate (16:2n6)                           | Lipid                  | Long Chain Polyunsaturated Fatty Acid (n3 and n6)       | 5398   | 251 | 1.12 | 0.16  | 0.2805 | 0.4397 |
| M2862 | 1-arachidonylglycerol (20:4)                        | Lipid                  | Monoacylglycerol                                        | 6250   | 803 | 0.88 | -0.19 | 0.2830 | 0.4401 |
| M2358 | 1-oleoyl-2-docosaheptaenoyl-GPC (18:1/22:6)*        | Lipid                  | Phosphatidylcholine (PC)                                | 2100   | 833 | 0.95 | -0.08 | 0.2832 | 0.4401 |
| M6443 | bilirubin degradation product, C16H18N2O5 (1)       | PCM                    | PCM                                                     | 3098   | 317 | 1.34 | 0.42  | 0.2817 | 0.4401 |
| M4590 | caffeine                                            | Xenobiotics            | Xanthine Metabolism                                     | 2106   | 195 | 0.71 | -0.49 | 0.2818 | 0.4401 |
| M427  | isobutyrylglycine (C4)                              | Amino Acid             | Leucine, Isoleucine and Valine Metabolism               | 1420   | 144 | 0.83 | -0.27 | 0.2828 | 0.4401 |
| M3340 | androsterone glucuronide                            | Amino Acid             | Androgenic Steroids                                     | 4953   | 465 | 0.78 | -0.35 | 0.2841 | 0.4407 |
| M364  | beta-hydroxyisovalerylcarntine                      | Amino Acid             | Leucine, Isoleucine and Valine Metabolism               | 2584   | 262 | 0.92 | -0.13 | 0.2846 | 0.4408 |
| M2800 | 1-(1-enyl-palmitoyl)-2-oleoyl-GPE (P-16:0/18:1)*    | Lipid                  | Plasmalogen                                             | 2750   | 703 | 0.94 | -0.10 | 0.2876 | 0.4417 |
| M2534 | 1-palmitoyl-2-oleoyl-GPI (16:0/18:1)*               | Lipid                  | Phosphatidylinositol (PI)                               | 3140   | 855 | 0.92 | -0.12 | 0.2879 | 0.4417 |
| M1164 | Fibrinopeptide A (8-16)                             | Peptide                | Fibrinogen Cleavage Peptide                             | 3944   | 903 | 0.89 | -0.16 | 0.2881 | 0.4417 |
| M1443 | isocitrate                                          | Energy                 | TCA Cycle                                               | 773    | 210 | 1.10 | 0.13  | 0.2881 | 0.4417 |
| M190  | phenol sulfate                                      | Amino Acid             | Tyrosine Metabolism                                     | 2156   | 173 | 0.66 | -0.59 | 0.2872 | 0.4417 |
| M3001 | sphinganine-1-phosphate                             | Lipid                  | Sphingolipid Synthesis                                  | 1431   | 382 | 1.08 | 0.11  | 0.2878 | 0.4417 |
| M563  | 4-guanidinobutanoate                                | Amino Acid             | Guanidino and Acetamido Metabolism                      | 2320   | 146 | 0.87 | -0.21 | 0.2932 | 0.4441 |
| M1351 | mannitol/sorbitol                                   | Carbohydrate           | Fructose, Mannose and Galactose Metabolism              | 2320   | 181 | 0.61 | -0.72 | 0.2910 | 0.4441 |
| M487  | ornithine                                           | Amino Acid             | Urea cycle; Arginine and Proline Metabolism             | 2800   | 133 | 0.92 | -0.12 | 0.2910 | 0.4441 |
| M5129 | 2-keto-3-deoxy-glucuronate                          | Xenobiotics            | Food Component/Plant                                    | 1900   | 177 | 0.90 | -0.15 | 0.2957 | 0.4502 |
| M2014 | 13-HODE + 9-HODE                                    | Lipid                  | Fatty Acid, Monohydroxy                                 | 5275   | 295 | 1.12 | 0.16  | 0.2970 | 0.4515 |
| M1431 | erythronate*                                        | Carbohydrate           | Aminosugar Metabolism                                   | 2186   | 135 | 0.93 | -0.11 | 0.2990 | 0.4538 |
| M37   | N-acetylaspartate (NAA)                             | Amino Acid             | Alanine and Aspartate Metabolism                        | 3143   | 174 | 0.89 | -0.16 | 0.3011 | 0.4561 |
| M141  | N-acetylphenylalanine                               | Amino Acid             | Phenylalanine Metabolism                                | 2597   | 206 | 1.14 | 0.19  | 0.3027 | 0.4578 |
| M5064 | 3-hydroxystachydrine*                               | Xenobiotics            | Food Component/Plant                                    | 1049   | 160 | 0.68 | -0.56 | 0.3036 | 0.4584 |
| M3051 | ceramide (d16:1/24:1, d18:1/22:1)*                  | Lipid                  | Ceramides                                               | 3850   | 621 | 1.09 | 0.12  | 0.3051 | 0.4593 |
| M867  | leucylalanine                                       | Peptide                | Dipeptide                                               | 2264   | 201 | 0.83 | -0.26 | 0.3052 | 0.4593 |
| M1689 | dodecadienoate (12:2)*                              | Lipid                  | Fatty Acid, Dicarboxylate                               | 5146   | 195 | 1.10 | 0.13  | 0.3059 | 0.4596 |
| M3099 | palmitoyl dihydrosphingomyelin (d18:0/16:0)*        | Lipid                  | Dihydrosphingomyelins                                   | 2290   | 706 | 0.95 | -0.07 | 0.3071 | 0.4607 |
| M2877 | 1-heptadecenoylglycerol (17:1)*                     | Lipid                  | Monoacylglycerol                                        | 6390   | 267 | 0.72 | -0.48 | 0.3130 | 0.4688 |
| M5063 | stachydrine                                         | Xenobiotics            | Food Component/Plant                                    | 1440   | 144 | 0.78 | -0.36 | 0.3180 | 0.4754 |
| M2933 | linoleoyl-linolenoyl-glycerol (18:2/18:3) [1]*      | Lipid                  | Diacylglycerol                                          | 2426   | 633 | 1.32 | 0.40  | 0.3189 | 0.4760 |
| M3526 | glycohyocholate                                     | Lipid                  | Secondary Bile Acid Metabolism                          | 5020   | 464 | 1.35 | 0.43  | 0.3232 | 0.4816 |
| M146  | 1-carboxyethylphenylalanine                         | Amino Acid             | Phenylalanine Metabolism                                | 2844   | 236 | 0.87 | -0.20 | 0.3281 | 0.4881 |
| M2941 | linoleoyl-arachidonoyl-glycerol (18:2/20:4) [1]*    | Lipid                  | Diacylglycerol                                          | 2590   | 659 | 0.90 | -0.15 | 0.3290 | 0.4886 |
| M1451 | malate                                              | Energy                 | TCA Cycle                                               | 615.6  | 133 | 1.10 | 0.14  | 0.3302 | 0.4896 |
| M16   | 2-methylserine                                      | Amino Acid             | Glycine, Serine and Threonine Metabolism                | 1652   | 120 | 0.84 | -0.24 | 0.3355 | 0.4959 |
| M60   | 2-pyrrolidinone                                     | Amino Acid             | Glutamate Metabolism                                    | 1262   | 86  | 0.91 | -0.13 | 0.3353 | 0.4959 |
| M6450 | bilirubin degradation product, C16H18N2O5 (3)       | PCM                    | PCM                                                     | 3354   | 317 | 1.25 | 0.32  | 0.3368 | 0.4969 |
| M6152 | dimethyl sulfone                                    | Xenobiotics            | Chemical                                                | 832    | 95  | 0.81 | -0.30 | 0.3377 | 0.4975 |
| M7    | betaine                                             | Amino Acid             | Glycine, Serine and Threonine Metabolism                | 1064   | 118 | 0.8  | -0.09 | 0.3413 | 0.5017 |
| M1694 | tetradecadienedioate (C14:2-DC)*                    | Lipid                  | Fatty Acid, Dicarboxylate                               | 3148   | 253 | 1.13 | 0.18  | 0.3416 | 0.5017 |
| M1699 | octadecadienoate (C18:1-DC)                         | Lipid                  | Fatty Acid, Dicarboxylate                               | 4875   | 311 | 0.90 | -0.15 | 0.3426 | 0.5023 |
| M1531 | 10-heptadecenoate (17:1n7)                          | Lipid                  | Long Chain Monounsaturated Fatty Acid                   | 5555   | 267 | 1.12 | 0.16  | 0.3467 | 0.5066 |
| M1960 | 2-hydroxyoctanoate                                  | Lipid                  | Fatty Acid, Monohydroxy                                 | 3736.8 | 159 | 1.38 | 0.47  | 0.3466 | 0.5066 |
| M1159 | Fibrinopeptide A (3-15)                             | Peptide                | Fibrinogen Cleavage Peptide                             | 2419   | 596 | 1.13 | 0.17  | 0.3479 | 0.5077 |
| M2322 | 1-stearoyl-2-oleoyl-GPC (18:0/18:1)                 | Lipid                  | Phosphatidylcholine (PC)                                | 2644   | 789 | 1.06 | 0.08  | 0.3531 | 0.5127 |
| M156  | 2-hydroxyphenylacetate                              | Amino Acid             | Phenylalanine Metabolism                                | 858.6  | 151 | 1.19 | 0.25  | 0.3523 | 0.5127 |
| M518  | N-methylproline                                     | Amino Acid             | Urea cycle; Arginine and Proline Metabolism             | 1335   | 130 | 0.74 | -0.43 | 0.3527 | 0.5127 |
| M1491 | caprylate (8:0)                                     | Lipid                  | Medium Chain Fatty Acid                                 | 4362   | 143 | 0.80 | -0.32 | 0.3543 | 0.5130 |
| M650  | gamma-glutamyl-2-aminobutyrate                      | Peptide                | Gamma-glutamyl Amino Acid                               | 2380   | 233 | 0.91 | -0.14 | 0.3544 | 0.5130 |
| M43   | hydroxyasparagine                                   | Amino Acid             | Alanine and Aspartate Metabolism                        | 1149   | 149 | 0.94 | -0.09 | 0.3572 | 0.5163 |
| M3502 | tauroithocholate 3-sulfate                          | Lipid                  | Secondary Bile Acid Metabolism                          | 5027   | 281 | 1.30 | 0.38  | 0.3597 | 0.5190 |
| M6452 | glutamine_degradant*                                | PCM                    | PCM                                                     | 1900   | 129 | 1.17 | 0.22  | 0.3608 | 0.5198 |
| M86   | N-acetylcarnosine                                   | Amino Acid             | Histidine Metabolism                                    | 2141   | 269 | 0.90 | -0.15 | 0.3615 | 0.5200 |
| M2278 | 1,2-dipalmitoyl-GPC (16:0/16:0)                     | Lipid                  | Phosphatidylcholine (PC)                                | 2450   | 735 | 1.06 | 0.08  | 0.3638 | 0.5210 |
| M2297 | 1-palmitoyl-2-arachidonoyl-GPC (16:0/20:4n6)        | Lipid                  | Phosphatidylcholine (PC)                                | 2200   | 783 | 0.96 | -0.06 | 0.3644 | 0.5210 |
| M1980 | 3-hydroxyoctanoate                                  | Lipid                  | Fatty Acid, Monohydroxy                                 | 3446   | 159 | 1.10 | 0.14  | 0.3653 | 0.5210 |
| M3364 | androstenediol (3beta,17beta) disulfate (2)         | Lipid                  | Androgenic Steroids                                     | 4065   | 224 | 0.90 | -0.14 | 0.3652 | 0.5210 |
| M4433 | carotene diol (3)                                   | Cofactors and Vitamins | Vitamin A Metabolism                                    | 1948   | 568 | 0.88 | -0.18 | 0.3649 | 0.5210 |
| M1186 | phenylacetylglutamate                               | Peptide                | Acetylated Peptides                                     | 1570   | 264 | 0.87 | -0.20 | 0.3657 | 0.5210 |
| M2861 | 1-dihomo-linolenylglycerol (20:3)                   | Lipid                  | Monoacylglycerol                                        | 6400   | 305 | 0.87 | -0.20 | 0.3678 | 0.5210 |
| M489  | 3-amino-2-piperidone                                | Amino Acid             | Urea cycle; Arginine and Proline Metabolism             | 2065   | 115 | 0.92 | -0.12 | 0.3667 | 0.5210 |
| M210  | homovanillate (HVA)                                 | Amino Acid             | Tyrosine Metabolism                                     | 1479   | 181 | 1.13 | 0.18  | 0.3674 | 0.5210 |
| M3311 | tetrahydrocortisol sulfate (1)                      | Lipid                  | Corticosteroids                                         | 4646   | 445 | 1.53 | 0.61  | 0.3680 | 0.5210 |
| M4466 | 2-hydroxyhippurate (salicylurate)                   | Xenobiotics            | Benzoate Metabolism                                     | 2184   | 194 | 0.49 | -0.02 | 0.3717 | 0.5239 |
| M6259 | 3,5-dichloro-2,6-dihydroxybenzoic acid              | Xenobiotics            | Chemical                                                | 693    | 221 | 0.93 | -0.11 | 0.3716 | 0.5239 |
| M3175 | 3-hydroxy-3-methylglutarate                         | Lipid                  | Mevalonate Metabolism                                   | 2850   | 161 | 0.93 | -0.11 | 0.3715 | 0.5239 |
| M4264 | 2'-O-methylcytidine                                 | Nucleotide             | Pyrimidine Metabolism, Cytidine containing              | 2411   | 258 | 1.13 | 0.17  | 0.3737 | 0.5259 |
| M4368 | gamma-CEHC                                          | Cofactors and Vitamins | Tocopherol Metabolism                                   | 3843   | 263 | 1.19 | 0.26  | 0.3750 | 0.5269 |
| M4410 | bilirubin (E,Z or Z,E)*                             | Cofactors and Vitamins | Hemoglobin and Porphyrin Metabolism                     | 1265   | 585 | 0.90 | -0.15 | 0.3769 | 0.5288 |
| M2542 | 1-stearoyl-2-oleoyl-GPI (18:0/18:1)*                | Lipid                  | Phosphatidylinositol (PI)                               | 3711   | 883 | 0.93 | -0.10 | 0.3776 | 0.5289 |
| M440  | methionine sulfoxide                                | Amino Acid             | Methionine, Cysteine, SAM and Taurine Metabolism        | 1272   | 166 | 0.91 | -0.14 | 0.3794 | 0.5306 |
| M3114 | sphingomyelin (d18:2/14:0, d18:1/14:1)*             | Lipid                  | Sphingomyelins                                          | 1860   | 674 | 0.91 | -0.13 | 0.3809 | 0.5319 |
| M2339 | 1-stearoyl-2-docosaheptaenoyl-GPC (18:0/22:6)       | Lipid                  | Phosphatidylcholine (PC)                                | 2300   | 835 | 1.04 | 0.06  | 0.3818 | 0.5323 |
| M5404 | salicyluric glucuronide*                            | Xenobiotics            | Drug - Analgesics, Anesthetics                          | 1463   | 370 | 0.55 | -0.87 | 0.3833 | 0.5336 |
| M204  | 3-methoxytyrosine                                   | Amino Acid             | Tyrosine Metabolism                                     | 2555   | 212 | 0.90 | -0.15 | 0.3853 | 0.5355 |
| M2934 | linoleoyl-linolenoyl-glycerol (18:2/18:3) [2]*      | Lipid                  | Diacylglycerol                                          | 2478   | 633 | 1.21 | 0.27  | 0.3881 | 0.5386 |
| M2283 | 1-palmitoyl-2-oleoyl-GPC (16:0/18:1)                | Lipid                  | Phosphatidylcholine (PC)                                | 2450   | 761 | 1.04 | 0.05  | 0.3891 | 0.5392 |
| M4284 | methylphosphate                                     | Nucleotide             | Purine and Pyrimidine Metabolism                        | 544    | 113 | 0.92 | -0.12 | 0.3916 | 0.5409 |
| M2915 | palmitoleoyl-arachidonoyl-glycerol (16:1/20:4) [2]* | Lipid                  | Diacylglycerol                                          | 2528   | 633 | 0.83 | -0.28 | 0.3912 | 0.5409 |
| M400  | tlglyl carnitine (C5)                               | Amino Acid             | Leucine, Isoleucine and Valine Metabolism               | 2962   | 244 | 0.87 | -0.20 | 0.3921 | 0.5409 |
| M1163 | Fibrinopeptide A (7-16)*                            | Peptide                | Fibrinogen Cleavage Peptide                             | 3258   | 509 | 1.10 | 0.14  | 0.3929 | 0.5412 |
| M512  | N-methylhydroxyproline                              | Amino Acid             | Urea cycle; Arginine and Proline Metabolism             | 1145   | 146 | 0.73 | -0.46 | 0.3953 | 0.5436 |
| M4349 | ascorbic acid 3-sulfate*                            | Cofactors and Vitamins | Ascorbate and Aldarate Metabolism                       | 2025   | 255 | 0.89 | -0.16 | 0.3998 | 0.5489 |
| M2907 | palmitoyl-linoleoyl-glycerol (16:0/18:2) [2]*       | Lipid                  | Diacylglycerol                                          | 3197   | 611 | 0.92 | -0.12 | 0.4011 | 0.5499 |
| M1700 | octadecadienedioate (C18:2-DC)*                     | Lipid                  | Fatty Acid, Dicarboxylate                               | 4676   | 309 | 0.82 | -0.28 | 0.4041 | 0.5532 |
| M1487 | butyrate/isobutyrate (4:0)                          | Lipid                  | Short Chain Fatty Acid                                  | 1062   | 87  | 0.88 | -0.18 | 0.4060 | 0.5542 |
| M1560 | eicosapentaenoate (EPA; 20:5n3)                     | Lipid                  | Long Chain Polyunsaturated Fatty Acid (n3 and n6)       | 5450   | 301 | 1.10 | 0.14  | 0.4060 | 0.5542 |
| M6451 | bilirubin degradation product, C16H18N2O5 (4)       | PCM                    | PCM                                                     | 3428   | 317 | 1.21 | 0.27  | 0.4067 | 0.5543 |
| M2410 | 1-palmitoyl-2-linoleoyl-GPE (16:0/18:2)             | Lipid                  | Phosphatidylethanolamine (PE)                           | 2350   | 717 | 1.08 | 0.11  | 0.4132 | 0.5619 |
| M6399 | glutamine conjugate of C6H10O2 (1)*                 | PCM                    | PCM                                                     | 2404   | 241 | 0.88 | -0.19 | 0.4135 | 0.5619 |
| M439  | methionine sulfone                                  | Amino Acid             | Methionine, Cysteine, SAM and Taurine Metabolism        | 1250   | 182 | 0.88 | -0.19 | 0.4188 | 0.5674 |
| M3283 | pregnenediol-3-glucuronide                          | Lipid                  | Progestin Steroids                                      | 5145   | 495 | 1.15 | 0.20  | 0.4187 | 0.5674 |
| M578  | cys-gly, oxidized                                   | Amino Acid             | Glutathione Metabolism                                  | 2947   | 355 | 1.17 | 0.23  | 0.4195 | 0.5675 |
| M1755 | 2-aminooctanoate                                    | Lipid                  | Fatty Acid, Amino                                       | 750    | 160 | 1.30 | 0.37  | 0.4228 | 0.5693 |
| M1179 | Fibrinopeptide B (1-12)                             | Peptide                | Fibrinogen Cleavage Peptide                             | 2366   | 661 | 0.90 | -0.16 | 0.4226 | 0.5693 |
| M255  | N-acetyltryptophan                                  | Amino Acid             | Tryptophan Metabolism                                   | 2630   | 245 | 0.91 | -0.14 | 0.4217 | 0.5693 |
| M274  | N-formylanthranilic acid                            | Amino Acid             | Tryptophan Metabolism                                   | 2150   | 164 | 1.20 | 0.26  | 0.4244 | 0.5707 |
| M1962 | 2-hydroxydecanoate                                  | Lipid                  | Fatty Acid, Monohydroxy                                 | 4840   | 187 | 1.15 | 0.20  | 0.4264 | 0.5726 |
| M1576 | docosapentaenoate (n6 DPA; 22:5n6)                  | Lipid                  | Long Chain Polyunsaturated Fatty Acid (n3 and n6)       | 5624.5 | 329 | 1.08 | 0.12  | 0.4273 | 0.5729 |
| M385  | isoleucine                                          | Amino Acid             | Leucine, Isoleucine and Valine Metabolism               | 2800   | 132 | 0.96 | -0.06 | 0.4302 | 0.5751 |
| M1550 | tetradecadienoate (14:2)*                           | Lipid                  | Long Chain Polyunsaturated Fatty Acid (n3 and n6)       | 5292   | 223 | 1.10 | 0.14  | 0.4300 | 0.5751 |
| M1648 | (16 or 17)-methylstearate (a19:0 or i19:0)          | Lipid                  | Fatty Acid, Branched                                    | 5993   | 297 | 1.08 | 0.10  | 0.4320 | 0.5753 |
| M6445 | bilirubin degradation product, C17H18N2O4 (1)       | PCM                    | PCM                                                     | 4633   | 313 | 0.90 | -0.16 | 0.4323 | 0.5753 |
| M1510 | palmitate (16:0)                                    | Lipid                  | Long Chain Saturated Fatty Acid                         | 5618   | 255 | 1.06 | 0.08  | 0.4318 | 0.5753 |
| M1703 | eicosenedioate (C20:1-DC)*                          | Lipid                  | Fatty Acid, Dicarboxylate                               | 5095   | 339 | 0.95 | -0.08 | 0.4362 | 0.5797 |
| M348  | 2-ketocaprylate                                     | Amino Acid             | Leucine, Isoleucine and Valine Metabolism               | 805    | 157 | 1.33 | 0.41  | 0.4373 | 0.5803 |
| M6422 | metabolonic lactone sulfate                         | PCM                    | PCM                                                     | 4802   | 427 | 1.15 | 0.21  | 0.4446 | 0.5891 |
| M1575 | adrenate (22:4n6)                                   | Lipid                  | Long Chain Polyunsaturated Fatty Acid (n3 and n6)       | 5678   | 331 | 1.10 | 0.13  | 0.4460 | 0.5901 |
| M6266 | 4-chlorobenzoic acid                                | Xenobiotics            | Chemical                                                | 3015   | 155 | 0.99 | -0.02 | 0.4500 | 0.5946 |
| M2030 | 12,13-DIHOME                                        | Lipid                  | Fatty Acid, Dihydroxy                                   | 5137   | 313 | 1.19 | 0.25  | 0.4541 | 0.5978 |
| M3378 | Salpha-androstan-3alpha,17beta-diol monosulfate (1) | Lipid                  | Androgenic Steroids                                     | 4925   | 371 | 0.82 | -0.29 | 0.4545 | 0.5978 |
| M1886 | oleoylcarnitine (C18:1)                             | Amino Acid             | Fatty Acid Metabolism (Acyl Carnitine, Monounsaturated) | 1423   | 426 | 0.93 | -0.10 | 0.4543 | 0.5978 |
| M435  | N-acetylmethionine                                  | Amino Acid             | Methionine, Cysteine, SAM and Taurine Metabolism        | 1787   | 190 | 1.08 | 0.11  | 0.4592 | 0.6032 |
| M6446 | bilirubin degradation product, C17H18N2O4 (2)       | PCM                    | PCM                                                     | 4793   | 313 | 0.90 | -0.16 | 0.4602 | 0.6036 |
| M4209 | orotidine                                           | Nucleotide             | Pyrimidine Metabolism, Orotate containing               | 2250   | 287 | 0.80 | -0.33 | 0.4611 | 0.6039 |
| M1691 | tetradecadienoate (C14)                             | Lipid                  | Fatty Acid, Dicarboxylate                               | 3985   | 257 | 1.   |       |        |        |

|        |                                                                 |                        |                                                         |        |     |      |       |        |        |
|--------|-----------------------------------------------------------------|------------------------|---------------------------------------------------------|--------|-----|------|-------|--------|--------|
| M1973  | 2-hydroxyarachidate*                                            | Lipid                  | Fatty Acid, Monohydroxy                                 | 5990   | 327 | 0.95 | -0.07 | 0.4670 | 0.6073 |
| M3033  | N-behenoyl-sphingadine (d18:2/22:0)*                            | Lipid                  | Ceramides                                               | 3911   | 621 | 0.95 | -0.07 | 0.4668 | 0.6073 |
| M1917  | octadecanediolkarnitine (C18-DC)*                               | Lipid                  | Fatty Acid Metabolism (Acyl Carnitine, Dicarboxylate)   | 1227   | 458 | 1.14 | 0.19  | 0.4702 | 0.6106 |
| M4352  | 2-O-methylascorbic acid                                         | Cofactors and Vitamins | Ascorbate and Aldarate Metabolism                       | 1512   | 189 | 0.94 | -0.09 | 0.4735 | 0.6140 |
| M1860  | decanoylcarnitine (C10)                                         | Lipid                  | Fatty Acid Metabolism (Acyl Carnitine, Medium Chain)    | 1130   | 316 | 1.08 | 0.10  | 0.4764 | 0.6169 |
| M4432  | carotene diol (2)                                               | Cofactors and Vitamins | Vitamin A Metabolism                                    | 1904   | 568 | 0.92 | -0.11 | 0.4776 | 0.6175 |
| M3350  | androsterone sulfate                                            | Lipid                  | Androgenic Steroids                                     | 5022   | 369 | 0.88 | -0.19 | 0.4789 | 0.6184 |
| M1526  | myristoleate (14:1n5)                                           | Lipid                  | Long Chain Monounsaturated Fatty Acid                   | 5346.9 | 225 | 1.10 | 0.13  | 0.4818 | 0.6212 |
| M3339  | 16a-hydroxy DHEA 3-sulfate                                      | Lipid                  | Androgenic Steroids                                     | 4240   | 383 | 0.85 | -0.24 | 0.4828 | 0.6216 |
| M3127  | sphingomyelin (d18:1/22:2, d18:2/22:1, d16:1/24:2)*             | Lipid                  | Sphingomyelins                                          | 2350   | 784 | 1.04 | 0.06  | 0.4852 | 0.6238 |
| M4238  | 3-ureidopropionate                                              | Nucleotide             | Pyrimidine Metabolism, Uracil containing                | 875    | 133 | 1.16 | 0.21  | 0.4869 | 0.6252 |
| M6260  | 3-bromo-5-chloro-2,6-dihydroxybenzoic acid*                     | Xenobiotics            | Chemical                                                | 4505   | 265 | 0.94 | -0.08 | 0.4904 | 0.6278 |
| M5073  | tartrate                                                        | Xenobiotics            | Food Component/Plant                                    | 615.3  | 149 | 0.74 | -0.43 | 0.4901 | 0.6278 |
| M15239 | 1-palmitoyl-2-arachidonoyl-GPI (16:0/20:4)*                     | Lipid                  | Phosphatidylinositol (PI)                               | 2567   | 877 | 0.91 | -0.14 | 0.4914 | 0.6282 |
| M6401  | glutamine conjugate of C7H12O2*                                 | PCM                    | PCM                                                     | 3053   | 255 | 1.15 | 0.10  | 0.4923 | 0.6285 |
| M6428  | carnitine of C10H14O2 (5)*                                      | PCM                    | PCM                                                     | 4521   | 370 | 1.07 | 0.10  | 0.4968 | 0.6324 |
| M3454  | glycocholate                                                    | Lipid                  | Primary Bile Acid Metabolism                            | 5163   | 464 | 1.21 | 0.28  | 0.4962 | 0.6324 |
| M529   | creatinine                                                      | Amino Acid             | Creatine Metabolism                                     | 2055   | 114 | 1.03 | 0.04  | 0.4993 | 0.6347 |
| M1774  | methylmalonate (MMA)                                            | Lipid                  | Fatty Acid Metabolism (also BCAA Metabolism)            | 3078.4 | 117 | 0.93 | -0.10 | 0.5056 | 0.6419 |
| M4999  | phytanate                                                       | Xenobiotics            | Food Component/Plant                                    | 5908   | 311 | 0.90 | -0.15 | 0.5091 | 0.6455 |
| M4304  | nicotinamide                                                    | Cofactors and Vitamins | Nicotinate and Nicotinamide Metabolism                  | 1942   | 123 | 0.84 | -0.26 | 0.5121 | 0.6484 |
| M282   | picolinate                                                      | Amino Acid             | Tryptophan Metabolism                                   | 910    | 124 | 1.09 | 0.12  | 0.5139 | 0.6497 |
| M394   | 3-methyl-2-oxovalerate                                          | Amino Acid             | Leucine, Isoleucine and Valine Metabolism               | 2064.2 | 129 | 0.95 | -0.07 | 0.5151 | 0.6503 |
| M3109  | sphingomyelin (d18:2/18:1)*                                     | Lipid                  | Sphingomyelins                                          | 2025   | 728 | 1.04 | 0.05  | 0.5185 | 0.6537 |
| M6221  | 3-hydroxypyridine sulfate                                       | Xenobiotics            | Chemical                                                | 1595.5 | 174 | 0.63 | -0.66 | 0.5202 | 0.6549 |
| M2303  | 1-palmitoyl-2-docosahexaenoyl-GPC (16:0/22:6)                   | Lipid                  | Phosphatidylcholine (PC)                                | 2055   | 807 | 0.97 | -0.04 | 0.5215 | 0.6557 |
| M1921  | 3-hydroxyhexanoylcarnitine (1)                                  | Lipid                  | Fatty Acid Metabolism (Acyl Carnitine, Hydroxy)         | 2918   | 276 | 1.10 | 0.13  | 0.5287 | 0.6638 |
| M1430  | N-acetylglucosaminylasparagine                                  | Carbohydrate           | Aminosugar Metabolism                                   | 1212   | 336 | 0.95 | -0.08 | 0.5336 | 0.6674 |
| M419   | N-carbamoylvaline                                               | Amino Acid             | Leucine, Isoleucine and Valine Metabolism               | 1270   | 159 | 0.91 | -0.14 | 0.5338 | 0.6674 |
| M4451  | pyridoxate                                                      | Cofactors and Vitamins | Vitamin B6 Metabolism                                   | 2185   | 182 | 1.09 | 0.12  | 0.5334 | 0.6674 |
| M3206  | 7-HOCA                                                          | Lipid                  | Sterol                                                  | 5288.1 | 429 | 0.96 | -0.06 | 0.5354 | 0.6685 |
| M1160  | Fibrinopeptide A (4-15)                                         | Peptide                | Fibrinogen Cleavage Peptide                             | 2570   | 552 | 1.10 | 0.14  | 0.5378 | 0.6706 |
| M2262  | 1-myristoyl-2-palmitoyl-GPC (14:0/16:0)                         | Lipid                  | Phosphatidylcholine (PC)                                | 2250   | 707 | 0.92 | -0.11 | 0.5416 | 0.6713 |
| M2721  | 1-stearoyl-GPI (18:0)                                           | Lipid                  | Lysophospholipid                                        | 5794   | 599 | 0.96 | -0.06 | 0.5435 | 0.6713 |
| M1966  | 2-hydroxylaurate                                                | Lipid                  | Fatty Acid, Monohydroxy                                 | 5211   | 215 | 0.96 | -0.06 | 0.5422 | 0.6713 |
| M120   | 5-(galactosylhydroxy)-L-lysine                                  | Amino Acid             | Lysine Metabolism                                       | 2755   | 325 | 0.94 | -0.09 | 0.5415 | 0.6713 |
| M4435  | beta-cryptoxanthin                                              | Cofactors and Vitamins | Vitamin A Metabolism                                    | 2560   | 552 | 0.86 | -0.22 | 0.5393 | 0.6713 |
| M4164  | N6-carbamoylthreonyladenosine                                   | Nucleotide             | Purine Metabolism, Adenine containing                   | 2164   | 411 | 0.92 | -0.12 | 0.5410 | 0.6713 |
| M4335  | paritoate                                                       | Cofactors and Vitamins | Pantothenate and CoA Metabolism                         | 1243   | 147 | 1.12 | 0.17  | 0.5432 | 0.6713 |
| M1698  | octadecanediolate (C18)                                         | Lipid                  | Fatty Acid, Dicarboxylate                               | 5043   | 313 | 1.07 | 0.10  | 0.5458 | 0.6732 |
| M2873  | 2-arachidonoylglycerol (20:4)                                   | Lipid                  | Monoglycerol                                            | 6170   | 303 | 0.93 | -0.11 | 0.5490 | 0.6762 |
| M151   | phenyllactate (PLA)                                             | Amino Acid             | Phenylalanine Metabolism                                | 2208   | 165 | 1.09 | 0.12  | 0.5539 | 0.6813 |
| M6417  | glycine conjugate of C10H12O2*                                  | PCM                    | PCM                                                     | 4005   | 220 | 1.10 | 0.14  | 0.5562 | 0.6825 |
| M150   | phenylpyruvate                                                  | Amino Acid             | Phenylalanine Metabolism                                | 2515   | 163 | 1.07 | 0.10  | 0.5564 | 0.6825 |
| M2731  | 1-arachidonoyl-GPI* (20:4)*                                     | Lipid                  | Lysophospholipid                                        | 5482   | 619 | 0.96 | -0.06 | 0.5718 | 0.7005 |
| M643   | gamma-glutamylphenylalanine                                     | Peptide                | Gamma-glutamyl Amino Acid                               | 1825   | 293 | 1.06 | 0.08  | 0.5738 | 0.7020 |
| M4530  | 4-vinylcatechol sulfate                                         | Xenobiotics            | Benzoate Metabolism                                     | 3060   | 215 | 0.70 | -0.52 | 0.5757 | 0.7033 |
| M554   | N1,N12-diacetylsermine                                          | Amino Acid             | Polyamine Metabolism                                    | 3105   | 287 | 0.76 | -0.40 | 0.5769 | 0.7039 |
| M564   | guanidinocuccinate                                              | Amino Acid             | Guanidino and Acetamido Metabolism                      | 640.2  | 174 | 1.13 | 0.18  | 0.5788 | 0.7053 |
| M2444  | 1-oleoyl-2-linoleoyl-GPE (18:1/18:2)*                           | Lipid                  | Phosphatidylethanolamine (PE)                           | 2270   | 743 | 1.06 | 0.09  | 0.5828 | 0.7086 |
| M546   | N(1)-acetylspermidine                                           | Amino Acid             | Polyamine Metabolism                                    | 3075   | 188 | 0.83 | -0.28 | 0.5831 | 0.7086 |
| M3130  | sphingomyelin (d18:2/24:1, d18:1/24:2)*                         | Lipid                  | Sphingomyelins                                          | 2750   | 812 | 1.02 | 0.03  | 0.5862 | 0.7115 |
| M2286  | 1-palmitoyl-2-linoleoyl-GPC (16:0/18:2)                         | Lipid                  | Phosphatidylcholine (PC)                                | 2160   | 759 | 0.98 | -0.03 | 0.5877 | 0.7122 |
| M2543  | 1-stearoyl-2-linoleoyl-GPI (18:0/18:2)                          | Lipid                  | Phosphatidylinositol (PI)                               | 3185   | 881 | 1.05 | 0.07  | 0.5899 | 0.7132 |
| M6190  | perfluorooctanesulfonate (PFOS)                                 | Xenobiotics            | Chemical                                                | 662    | 499 | 0.91 | -0.13 | 0.5900 | 0.7132 |
| M4153  | 1-methyladenosine                                               | Nucleotide             | Purine Metabolism, Adenine containing                   | 2120   | 282 | 1.07 | 0.09  | 0.5917 | 0.7143 |
| M829   | glycylvaline                                                    | Peptide                | Dipeptide                                               | 2734   | 175 | 1.40 | 0.48  | 0.5941 | 0.7162 |
| M1986  | 3-hydroxymyristate                                              | Lipid                  | Fatty Acid, Monohydroxy                                 | 5335   | 243 | 1.06 | 0.09  | 0.5977 | 0.7197 |
| M3117  | sphingomyelin (d18:2/16:0, d18:1/16:1)*                         | Lipid                  | Sphingomyelins                                          | 2002   | 702 | 1.02 | 0.04  | 0.5993 | 0.7206 |
| M515   | prolylhydroxyproline                                            | Amino Acid             | Urea cycle; Arginine and Proline Metabolism             | 2128   | 229 | 0.94 | -0.09 | 0.6009 | 0.7215 |
| M6239  | thioprolin                                                      | Xenobiotics            | Chemical                                                | 1250   | 134 | 1.04 | 0.06  | 0.6043 | 0.7246 |
| M91    | 1-methyl-4-imidazoleacetate                                     | Amino Acid             | Histidine Metabolism                                    | 2064   | 141 | 0.84 | -0.24 | 0.6120 | 0.7319 |
| M4523  | 4-ethylphenyl sulfate                                           | Xenobiotics            | Benzoate Metabolism                                     | 3580   | 201 | 0.75 | -0.41 | 0.6119 | 0.7319 |
| M2279  | 1-palmitoyl-2-palmitoleoyl-GPC (16:0/16:1)*                     | Lipid                  | Phosphatidylcholine (PC)                                | 2200   | 733 | 0.95 | -0.09 | 0.6139 | 0.7324 |
| M4544  | methyl-4-hydroxybenzenesulfate                                  | Xenobiotics            | Benzoate Metabolism                                     | 2873   | 231 | 0.81 | -0.31 | 0.6147 | 0.7324 |
| M3103  | palmitoyl sphingomyelin (d18:1/16:0)                            | Lipid                  | Sphingomyelins                                          | 2168   | 704 | 0.99 | -0.02 | 0.6147 | 0.7324 |
| M1445  | alpha-ketoglutarate                                             | Energy                 | TCA Cycle                                               | 2700   | 145 | 1.05 | 0.06  | 0.6205 | 0.7382 |
| M3363  | androstenediol (3beta,17beta) disulfate (1)                     | Lipid                  | Androgenic Steroids                                     | 3740   | 224 | 0.92 | -0.12 | 0.6221 | 0.7387 |
| M3105  | stearoyl sphingomyelin (d18:1/18:0)                             | Lipid                  | Sphingomyelins                                          | 2450   | 732 | 0.98 | -0.04 | 0.6225 | 0.7387 |
| M6447  | bilirubin degradation product, C17H18N2O4 (3)                   | PCM                    | PCM                                                     | 4906   | 313 | 0.93 | -0.10 | 0.6235 | 0.7387 |
| M3484  | deoxycholic acid glucuronide                                    | Lipid                  | Secondary Bile Acid Metabolism                          | 4800   | 567 | 1.09 | 0.13  | 0.6241 | 0.7387 |
| M4223  | 2'-O-methyluridine                                              | Nucleotide             | Pyrimidine Metabolism, Uracil containing                | 1831   | 257 | 0.94 | -0.09 | 0.6252 | 0.7391 |
| M6444  | bilirubin degradation product, C16H18N2O5 (2)                   | PCM                    | PCM                                                     | 3204   | 317 | 1.10 | 0.13  | 0.6282 | 0.7416 |
| M1924  | 3-hydroxyoctanoylcarnitine (1)                                  | Lipid                  | Fatty Acid Metabolism (Acyl Carnitine, Hydroxy)         | 3445   | 304 | 1.06 | 0.08  | 0.6330 | 0.7453 |
| M3353  | etiocolanolone glucuronide                                      | Lipid                  | Androgenic Steroids                                     | 4915   | 465 | 0.93 | -0.11 | 0.6322 | 0.7453 |
| M2582  | 1-palmitoyl-GPA (16:0)                                          | Lipid                  | Lysophospholipid                                        | 5600   | 409 | 0.94 | -0.09 | 0.6392 | 0.7517 |
| M227   | N-formylphenylalanine                                           | Amino Acid             | Tyrosine Metabolism                                     | 2360   | 192 | 1.16 | 0.22  | 0.6454 | 0.7580 |
| M3122  | sphingomyelin (d18:1/20:1, d18:2/20:0)*                         | Lipid                  | Sphingomyelins                                          | 2450   | 758 | 0.98 | -0.03 | 0.6468 | 0.7587 |
| M1857  | nonanoylcarnitine (C9)                                          | Lipid                  | Fatty Acid Metabolism (Acyl Carnitine, Medium Chain)    | 1010   | 302 | 0.94 | -0.09 | 0.6478 | 0.7588 |
| M1985  | 3-hydroxylaurate                                                | Lipid                  | Fatty Acid, Monohydroxy                                 | 5175   | 215 | 1.06 | 0.08  | 0.6548 | 0.7661 |
| M4476  | benzoate                                                        | Xenobiotics            | Benzoate Metabolism                                     | 1750   | 121 | 1.11 | 0.15  | 0.6587 | 0.7688 |
| M4592  | theobromine                                                     | Xenobiotics            | Xanthine Metabolism                                     | 1600   | 181 | 0.91 | -0.14 | 0.6589 | 0.7688 |
| M1642  | (14 or 15)-methylpalmitate (a17:0 or i17:0)                     | Lipid                  | Fatty Acid, Branched                                    | 5695   | 269 | 1.05 | 0.07  | 0.6701 | 0.7738 |
| M448   | 2,3-dihydroxy-5-methylthio-4-pentenoate (DMTPA)*                | Amino Acid             | Methionine, Cysteine, SAM and Taurine Metabolism        | 1156   | 177 | 1.03 | 0.05  | 0.6676 | 0.7738 |
| M367   | 3-methylglutaconate                                             | Amino Acid             | Leucine, Isoleucine and Valine Metabolism               | 2700   | 99  | 0.96 | -0.06 | 0.6661 | 0.7738 |
| M343   | 4-methyl-2-oxopentanoate                                        | Amino Acid             | Leucine, Isoleucine and Valine Metabolism               | 2170   | 129 | 1.03 | 0.04  | 0.6649 | 0.7738 |
| M528   | creatine                                                        | Amino Acid             | Creatine Metabolism                                     | 1947   | 132 | 0.93 | -0.11 | 0.6688 | 0.7738 |
| M468   | cysteine sulfinic acid                                          | Amino Acid             | Methionine, Cysteine, SAM and Taurine Metabolism        | 597    | 154 | 1.05 | 0.07  | 0.6676 | 0.7738 |
| M4364  | delta-tocopherol                                                | Cofactors and Vitamins | Tocopherol Metabolism                                   | 2259   | 402 | 1.08 | 0.12  | 0.6711 | 0.7738 |
| M4192  | N2,N2-dimethylguanosine                                         | Nucleotide             | Purine Metabolism, Guanine containing                   | 2210   | 312 | 1.05 | 0.07  | 0.6702 | 0.7738 |
| M114   | N6-methyllysine                                                 | Amino Acid             | Lysine Metabolism                                       | 2831   | 161 | 0.92 | -0.12 | 0.6708 | 0.7738 |
| M3126  | sphingomyelin (d18:1/22:1, d18:2/22:0, d16:1/24:1)*             | Lipid                  | Sphingomyelins                                          | 2775   | 786 | 0.98 | -0.03 | 0.6716 | 0.7738 |
| M2942  | linoleoyl-arachidonoyl-glycerol (18:2/20:4) [2]*                | Lipid                  | Diacylglycerol                                          | 2650   | 659 | 0.96 | -0.06 | 0.6745 | 0.7751 |
| M1885  | palmitoleoylcarnitine (C16:1)*                                  | Lipid                  | Fatty Acid Metabolism (Acyl Carnitine, Monounsaturated) | 1357   | 398 | 0.96 | -0.06 | 0.6739 | 0.7751 |
| M579   | 5-oxoproline                                                    | Amino Acid             | Glutathione Metabolism                                  | 738.5  | 128 | 1.06 | 0.08  | 0.6803 | 0.7808 |
| M1509  | pentadecanoate (15:0)                                           | Lipid                  | Long Chain Saturated Fatty Acid                         | 5521   | 241 | 1.04 | 0.06  | 0.6824 | 0.7822 |
| M3052  | ceramide (d18:2/24:1, d18:1/24:2)*                              | Lipid                  | Ceramides                                               | 3858   | 647 | 1.03 | 0.04  | 0.6840 | 0.7831 |
| M62    | S-1-pyrroline-5-carboxylate                                     | Amino Acid             | Glutamate Metabolism                                    | 1528   | 114 | 0.97 | -0.05 | 0.6864 | 0.7848 |
| M119   | 5-hydroxylysine                                                 | Amino Acid             | Lysine Metabolism                                       | 2790   | 163 | 0.97 | -0.05 | 0.6882 | 0.7859 |
| M2906  | palmitoyl-linoleoyl-glycerol (16:0/18:2) [1]*                   | Lipid                  | Diacylglycerol                                          | 3080   | 611 | 0.95 | -0.07 | 0.6947 | 0.7923 |
| M3514  | glycoursodeoxycholate                                           | Lipid                  | Secondary Bile Acid Metabolism                          | 5033   | 448 | 0.82 | -0.29 | 0.6973 | 0.7942 |
| M3116  | sphingomyelin (d17:2/16:0, d18:2/15:0)*                         | Lipid                  | Sphingomyelins                                          | 1875   | 688 | 0.96 | -0.06 | 0.6993 | 0.7956 |
| M1929  | 3-hydroxyoleoylcarnitine                                        | Lipid                  | Fatty Acid Metabolism (Acyl Carnitine, Hydroxy)         | 1406   | 442 | 0.94 | -0.09 | 0.7013 | 0.7959 |
| M1507  | myristate (14:0)                                                | Lipid                  | Long Chain Saturated Fatty Acid                         | 5440   | 227 | 0.96 | -0.06 | 0.7012 | 0.7959 |
| M1223  | glucose                                                         | Carbohydrate           | Glycolysis, Gluconeogenesis, and Pyruvate Metabolism    | 2342   | 225 | 0.98 | -0.03 | 0.7024 | 0.7961 |
| M397   | 2-methylbutyrylcarnitine (C5)                                   | Amino Acid             | Leucine, Isoleucine and Valine Metabolism               | 3050   | 246 | 1.07 | 0.10  | 0.7071 | 0.7995 |
| M4501  | guaicol sulfate                                                 | Xenobiotics            | Benzoate Metabolism                                     | 2344   | 203 | 0.82 | -0.29 | 0.7070 | 0.7995 |
| M6449  | bilirubin degradation product, C17H20N2O5 (2)                   | PCM                    | PCM                                                     | 3890   | 331 | 0.93 | -0.11 | 0.7129 | 0.8050 |
| M1831  | 3-hydroxybutyrylglycine                                         | Lipid                  | Fatty Acid Metabolism (Acyl Glycine)                    | 978    | 162 | 1.06 | 0.08  | 0.7156 | 0.8056 |
| M1990  | 3-hydroxyoleate*                                                | Lipid                  | Fatty Acid, Monohydroxy                                 | 5508   | 297 | 1.05 | 0.07  | 0.7161 | 0.8056 |
| M3111  | sphingomyelin (d18:2/24:2)*                                     | Lipid                  | Sphingomyelins                                          | 2400   | 810 | 1.02 | 0.02  | 0.7153 | 0.8056 |
| M4506  | 4-allylcatechol sulfate                                         | Xenobiotics            | Benzoate Metabolism                                     | 3571   | 229 | 0.86 | -0.21 | 0.7225 | 0.8118 |
| M6433  | branched-chain, straight-chain, or cyclopropyl 12:1 fatty acid* | PCM                    | PCM                                                     | 5261   | 197 | 1.04 | 0.06  | 0.7246 | 0.8132 |
| M275   | anthranilate                                                    | Amino Acid             | Tryptophan Metabolism                                   | 2606   | 120 | 1.05 | 0.07  | 0.7264 | 0.8142 |
| M6448  | bilirubin degradation product, C17H20N2O5 (1)                   | PCM                    | PCM                                                     | 3756   | 331 | 0.93 | -0.10 | 0.7288 | 0.8159 |
| M3125  | sphingomyelin (d18:2/21:0, d16:2/23:0)*                         | Lipid</                |                                                         |        |     |      |       |        |        |

|       |                                                        |                        |                                                              |        |     |      |       |        |        |
|-------|--------------------------------------------------------|------------------------|--------------------------------------------------------------|--------|-----|------|-------|--------|--------|
| M3504 | ursodeoxycholate                                       | Lipid                  | Secondary Bile Acid Metabolism                               | 5055   | 391 | 0.81 | -0.31 | 0.7414 | 0.8259 |
| M1504 | 5-dodecanoate (12:1n7)                                 | Lipid                  | Medium Chain Fatty Acid                                      | 5224   | 197 | 1.04 | 0.06  | 0.7454 | 0.8273 |
| M1449 | fumarate                                               | Energy                 | TCA Cycle                                                    | 3084   | 115 | 0.97 | -0.05 | 0.7445 | 0.8273 |
| M73   | N-acetylhistidine                                      | Amino Acid             | Histidine Metabolism                                         | 2065   | 198 | 0.92 | -0.11 | 0.7449 | 0.8273 |
| M6252 | 5-hydroxy-2-methylpyridine sulfate                     | Xenobiotics            | Chemical                                                     | 2074   | 188 | 0.76 | -0.39 | 0.7474 | 0.8285 |
| M1705 | 3-carboxy-4-methyl-5-propyl-2-furanpropanoate (CMPF)   | Lipid                  | Fatty Acid, Dicarboxylate                                    | 2800   | 239 | 0.95 | -0.07 | 0.7593 | 0.8390 |
| M1927 | 3-hydroxydecanoylcarnitine                             | Lipid                  | Fatty Acid Metabolism (Acyl Carnitine, Hydroxy)              | 961    | 332 | 1.04 | 0.05  | 0.7589 | 0.8390 |
| M287  | serotonin                                              | Amino Acid             | Tryptophan Metabolism                                        | 2550   | 177 | 1.08 | 0.11  | 0.7596 | 0.8390 |
| M476  | succinoyltaurine                                       | Amino Acid             | Methionine, Cysteine, SAM and Taurine Metabolism             | 2572   | 224 | 1.07 | 0.09  | 0.7605 | 0.8390 |
| M1995 | 5-hydroxyhexanoate                                     | Lipid                  | Fatty Acid, Monohydroxy                                      | 1267   | 131 | 1.05 | 0.08  | 0.7631 | 0.8408 |
| M1239 | pyruvate                                               | Carbohydrate           | Glycolysis, Gluconeogenesis, and Pyruvate Metabolism         | 1083   | 87  | 0.97 | -0.04 | 0.7671 | 0.8441 |
| M5328 | N-methylpipecolate                                     | Xenobiotics            | Bacteria/Fungal                                              | 1932   | 144 | 0.91 | -0.14 | 0.7684 | 0.8446 |
| M2723 | 1-oleoyl-GPI (18:1)                                    | Lipid                  | Lysophospholipid                                             | 5599   | 597 | 1.03 | 0.04  | 0.7711 | 0.8465 |
| M36   | aspartate                                              | Amino Acid             | Alanine and Aspartate Metabolism                             | 1165   | 134 | 1.03 | 0.05  | 0.7727 | 0.8473 |
| M1498 | (2 or 3)-decenoate (10:1n7 or n8)                      | Lipid                  | Medium Chain Fatty Acid                                      | 4990   | 169 | 0.97 | -0.05 | 0.7742 | 0.8479 |
| M1136 | glu-gly-asp-val                                        | Peptide                | Polypeptide                                                  | 2675   | 418 | 1.07 | 0.10  | 0.7791 | 0.8512 |
| M466  | lanthionine                                            | Amino Acid             | Methionine, Cysteine, SAM and Taurine Metabolism             | 1730   | 209 | 1.02 | 0.03  | 0.7786 | 0.8512 |
| M4408 | bilirubin                                              | Cofactors and Vitamins | Hemoglobin and Porphyrin Metabolism                          | 1840   | 585 | 0.97 | -0.04 | 0.7805 | 0.8517 |
| M1982 | 3-hydroxydecanoate                                     | Lipid                  | Fatty Acid, Monohydroxy                                      | 4634.7 | 187 | 1.03 | 0.05  | 0.7843 | 0.8528 |
| M1573 | arachidonate (20:4n6)                                  | Lipid                  | Long Chain Polyunsaturated Fatty Acid (n3 and n6)            | 5535   | 303 | 1.03 | 0.04  | 0.7833 | 0.8528 |
| M1768 | butyrylcarnitine (C4)                                  | Lipid                  | Fatty Acid Metabolism (also BCAA Metabolism)                 | 2860   | 232 | 0.95 | -0.08 | 0.7839 | 0.8528 |
| M4407 | heme                                                   | Cofactors and Vitamins | Hemoglobin and Porphyrin Metabolism                          | 1124   | 616 | 1.14 | 0.20  | 0.7862 | 0.8539 |
| M1840 | acetylcarnitine (C2)                                   | Lipid                  | Fatty Acid Metabolism (Acyl Carnitine, Short Chain)          | 2282   | 204 | 0.97 | -0.04 | 0.7872 | 0.8539 |
| M2841 | glycerol                                               | Lipid                  | Glycerolipid Metabolism                                      | 758    | 91  | 0.97 | -0.04 | 0.7917 | 0.8578 |
| M2325 | 1-stearoyl-2-linoleoyl-GPC (18:0/18:2)*                | Lipid                  | Phosphatidylcholine (PC)                                     | 2450   | 787 | 0.99 | -0.01 | 0.7956 | 0.8609 |
| M1891 | linoleoylcarnitine (C18:2)*                            | Lipid                  | Fatty Acid Metabolism (Acyl Carnitine, Polyunsaturated)      | 1430   | 424 | 0.98 | -0.03 | 0.7997 | 0.8633 |
| M2926 | oleoyl-linoleoyl-glycerol (18:1/18:2) [1]              | Lipid                  | Diacylglycerol                                               | 3115   | 637 | 1.03 | 0.04  | 0.7994 | 0.8633 |
| M3380 | Salpha-androstan-3alpha,17beta-diol disulfate          | Lipid                  | Androgenic Steroids                                          | 4275   | 225 | 0.91 | -0.13 | 0.8071 | 0.8703 |
| M3106 | behenoyl sphingomyelin (d18:1/22:0)*                   | Lipid                  | Sphingomyelins                                               | 3250   | 788 | 1.01 | 0.02  | 0.8097 | 0.8720 |
| M4498 | catechol sulfate                                       | Xenobiotics            | Benzoate Metabolism                                          | 1906   | 189 | 0.87 | -0.20 | 0.8129 | 0.8744 |
| M3047 | ceramide (d18:1/14:0, d16:1/16:0)*                     | Lipid                  | Ceramides                                                    | 2477   | 510 | 0.98 | -0.03 | 0.8176 | 0.8784 |
| M2333 | 1-stearoyl-2-arachidonoyl-GPC (18:0/20:4)              | Lipid                  | Phosphatidylcholine (PC)                                     | 2400   | 811 | 1.01 | 0.01  | 0.8219 | 0.8821 |
| M51   | 4-hydroxyglutamate                                     | Amino Acid             | Glutamate Metabolism                                         | 1141   | 164 | 1.02 | 0.03  | 0.8230 | 0.8822 |
| M3500 | glycolithocholate sulfate*                             | Lipid                  | Secondary Bile Acid Metabolism                               | 5011   | 256 | 1.06 | 0.08  | 0.8258 | 0.8841 |
| M33   | N,N-dimethylalanine                                    | Amino Acid             | Alanine and Aspartate Metabolism                             | 1370   | 118 | 0.94 | -0.09 | 0.8289 | 0.8865 |
| M4126 | N1-methylinosine                                       | Nucleotide             | Purine Metabolism, (Hypo)Xanthine/Inosine containing         | 1430   | 283 | 0.97 | -0.04 | 0.8330 | 0.8898 |
| M449  | 2-hydroxy-4-(methylthio)butanoic acid                  | Amino Acid             | Methionine, Cysteine, SAM and Taurine Metabolism             | 1065   | 149 | 0.98 | -0.03 | 0.8345 | 0.8903 |
| M1674 | heptenedioate (C7:1-DC)*                               | Lipid                  | Fatty Acid, Dicarboxylate                                    | 2816   | 157 | 0.97 | -0.04 | 0.8387 | 0.8938 |
| M1939 | citrate                                                | Energy                 | TCA Cycle                                                    | 582    | 191 | 0.98 | -0.02 | 0.8451 | 0.8959 |
| M2536 | 1-palmitoyl-2-linoleoyl-GPI (16:0/18:2)                | Lipid                  | Phosphatidylinositol (PI)                                    | 2730   | 853 | 1.02 | 0.02  | 0.8528 | 0.9008 |
| M556  | 5-methylthioadenosine (MTA)                            | Amino Acid             | Polyamine Metabolism                                         | 2752   | 298 | 0.98 | -0.03 | 0.8543 | 0.9008 |
| M3193 | cholesterol sulfate                                    | Lipid                  | Sterol                                                       | 681    | 465 | 0.98 | -0.03 | 0.8505 | 0.9008 |
| M1563 | docosahexaenoate (DHA; 22:6n3)                         | Lipid                  | Long Chain Polyunsaturated Fatty Acid (n3 and n6)            | 5525   | 327 | 1.01 | 0.02  | 0.8516 | 0.9008 |
| M3134 | palmitoyl-sphingosine-phosphoethanolamine (d18:1/16:0) | Lipid                  | Ceramide PEs                                                 | 2207   | 662 | 1.01 | 0.01  | 0.8538 | 0.9008 |
| M3115 | sphingomyelin (d17:1/16:0, d18:1/15:0, d16:1/17:0)*    | Lipid                  | Sphingomyelins                                               | 2082   | 690 | 0.99 | -0.02 | 0.8473 | 0.9008 |
| M3119 | sphingomyelin (d18:1/18:1, d18:2/18:0)                 | Lipid                  | Sphingomyelins                                               | 2167   | 730 | 1.01 | 0.02  | 0.8499 | 0.9008 |
| M6205 | trizma acetate                                         | Xenobiotics            | Chemical                                                     | 1884   | 122 | 1.15 | 0.20  | 0.8509 | 0.9008 |
| M4186 | 7-methylguanine                                        | Nucleotide             | Purine Metabolism, Guanine containing                        | 2175   | 166 | 1.02 | 0.03  | 0.8658 | 0.9119 |
| M4239 | beta-alanine                                           | Nucleotide             | Pyrimidine Metabolism, Uracil containing                     | 1905   | 90  | 0.99 | -0.01 | 0.8687 | 0.9129 |
| M3110 | sphingomyelin (d18:2/23:1)*                            | Lipid                  | Sphingomyelins                                               | 2500   | 798 | 1.01 | 0.02  | 0.8681 | 0.9129 |
| M1562 | docosapentaenoate (DPA; 22:5n3)                        | Lipid                  | Long Chain Polyunsaturated Fatty Acid (n3 and n6)            | 5571   | 329 | 1.02 | 0.02  | 0.8714 | 0.9146 |
| M1925 | 3-hydroxyoctanoylcarnitine (2)                         | Lipid                  | Fatty Acid Metabolism (Acyl Carnitine, Hydroxy)              | 3497   | 304 | 0.98 | -0.03 | 0.8741 | 0.9162 |
| M3525 | hyocholate                                             | Lipid                  | Secondary Bile Acid Metabolism                               | 5046   | 407 | 1.03 | 0.04  | 0.8749 | 0.9162 |
| M4360 | alpha-tocopherol                                       | Cofactors and Vitamins | Tocopherol Metabolism                                        | 2522   | 430 | 0.99 | -0.01 | 0.8760 | 0.9163 |
| M4504 | 4-ethylcatechol sulfate                                | Xenobiotics            | Benzoate Metabolism                                          | 3379   | 217 | 0.90 | -0.15 | 0.8799 | 0.9194 |
| M1919 | (R)-3-hydroxybutyrylcarnitine                          | Lipid                  | Fatty Acid Metabolism (Acyl Carnitine, Hydroxy)              | 2400   | 248 | 1.05 | 0.07  | 0.8829 | 0.9203 |
| M647  | gamma-glutamylvaline                                   | Peptide                | Gamma-glutamyl Amino Acid                                    | 2700   | 247 | 0.99 | -0.02 | 0.8822 | 0.9203 |
| M3280 | Salpha-pregnan-3beta,20alpha-diol disulfate            | Lipid                  | Progesterin Steroids                                         | 3962   | 239 | 1.02 | 0.03  | 0.8911 | 0.9278 |
| M133  | 6-oxopiperidine-2-carboxylate                          | Amino Acid             | Lysine Metabolism                                            | 965    | 142 | 0.96 | -0.06 | 0.8931 | 0.9289 |
| M4450 | pyridoxal                                              | Cofactors and Vitamins | Vitamin B6 Metabolism                                        | 2343   | 168 | 1.00 | -0.01 | 0.9015 | 0.9365 |
| M3368 | androstenediol (3alpha, 17alpha) monosulfate (3)       | Lipid                  | Androgenic Steroids                                          | 5180   | 369 | 1.02 | 0.03  | 0.9047 | 0.9388 |
| M407  | ethylmalonate                                          | Amino Acid             | Leucine, Isoleucine and Valine Metabolism                    | 2785   | 131 | 1.03 | 0.04  | 0.9063 | 0.9394 |
| M1668 | 3-hydroxyadipate                                       | Lipid                  | Fatty Acid, Dicarboxylate                                    | 3131   | 161 | 1.02 | 0.03  | 0.9100 | 0.9422 |
| M56   | beta-citrylgutamate                                    | Amino Acid             | Glutamate Metabolism                                         | 900    | 322 | 0.98 | -0.04 | 0.9148 | 0.9446 |
| M2196 | N-oleoyserine                                          | Lipid                  | Endocannabinoid                                              | 5600   | 368 | 0.99 | -0.01 | 0.9155 | 0.9446 |
| M5116 | 4-vinylguaiacol sulfate                                | Xenobiotics            | Food Component/Plant                                         | 3354   | 229 | 1.10 | 0.13  | 0.9140 | 0.9446 |
| M1663 | 2-hydroxyglutarate                                     | Lipid                  | Fatty Acid, Dicarboxylate                                    | 958    | 166 | 1.04 | 0.06  | 0.9238 | 0.9495 |
| M577  | cysteinylglycine disulfide*                            | Amino Acid             | Glutathione Metabolism                                       | 2547   | 298 | 1.01 | 0.01  | 0.9223 | 0.9495 |
| M544  | N-acetyl-isoputrescine                                 | Amino Acid             | Polyamine Metabolism                                         | 2305   | 203 | 0.96 | -0.06 | 0.9244 | 0.9495 |
| M1681 | sebacate (C10-DC)                                      | Lipid                  | Fatty Acid, Dicarboxylate                                    | 1788   | 201 | 1.02 | 0.03  | 0.9229 | 0.9495 |
| M110  | N2-acetyl,N6,N6-dimethyllysine                         | Amino Acid             | Lysine Metabolism                                            | 2172   | 217 | 1.05 | 0.07  | 0.9294 | 0.9524 |
| M1184 | phenylacetylcarnitine                                  | Peptide                | Acetylated Peptides                                          | 3092   | 280 | 1.02 | 0.03  | 0.9290 | 0.9524 |
| M2452 | 1,2-dilinoleoyl-GPE (18:2/18:2)*                       | Lipid                  | Phosphatidylethanolamine (PE)                                | 2150   | 741 | 1.02 | 0.02  | 0.9316 | 0.9537 |
| M1879 | 3-decenoylcarnitine                                    | Lipid                  | Fatty Acid Metabolism (Acyl Carnitine, Monounsaturated)      | 1045   | 314 | 1.01 | 0.01  | 0.9373 | 0.9562 |
| M1989 | 3-hydroxystearate                                      | Lipid                  | Fatty Acid, Monohydroxy                                      | 5674   | 299 | 1.02 | 0.02  | 0.9367 | 0.9562 |
| M1862 | myristoylcarnitine (C14)                               | Lipid                  | Fatty Acid Metabolism (Acyl Carnitine, Long Chain Saturated) | 1350   | 372 | 0.99 | -0.01 | 0.9367 | 0.9562 |
| M1564 | docosatrienoate (22:3n3)                               | Lipid                  | Long Chain Polyunsaturated Fatty Acid (n3 and n6)            | 5823   | 333 | 0.99 | -0.01 | 0.9431 | 0.9610 |
| M1920 | (S)-3-hydroxybutyrylcarnitine                          | Lipid                  | Fatty Acid Metabolism (Acyl Carnitine, Hydroxy)              | 2340   | 248 | 1.01 | 0.02  | 0.9466 | 0.9626 |
| M264  | tryptophan betaine                                     | Amino Acid             | Tryptophan Metabolism                                        | 2673   | 247 | 0.98 | -0.03 | 0.9467 | 0.9626 |
| M2033 | 2S,3R-dihydroxybutyrate                                | Lipid                  | Fatty Acid, Dihydroxy                                        | 1660   | 119 | 0.99 | -0.01 | 0.9527 | 0.9676 |
| M428  | 3-hydroxyisobutyrate                                   | Amino Acid             | Leucine, Isoleucine and Valine Metabolism                    | 1619   | 103 | 0.99 | -0.01 | 0.9555 | 0.9694 |
| M6254 | 3-hydroxy-2-methylpyridine sulfate                     | Xenobiotics            | Chemical                                                     | 1849   | 188 | 0.96 | -0.06 | 0.9607 | 0.9736 |
| M3461 | glycochenodeoxycholate                                 | Lipid                  | Primary Bile Acid Metabolism                                 | 5236.1 | 448 | 0.99 | -0.01 | 0.9659 | 0.9777 |
| M1852 | octanoylcarnitine (C8)                                 | Lipid                  | Fatty Acid Metabolism (Acyl Carnitine, Medium Chain)         | 950    | 288 | 1.00 | 0.01  | 0.9701 | 0.9809 |
| M3219 | 4-cholesten-3-one                                      | Lipid                  | Sterol                                                       | 2520   | 385 | 1.00 | 0.00  | 0.9811 | 0.9865 |
| M4251 | cytidine                                               | Nucleotide             | Pyrimidine Metabolism, Cytidine containing                   | 2124   | 244 | 1.00 | 0.01  | 0.9805 | 0.9865 |
| M1346 | fructose                                               | Carbohydrate           | Fructose, Mannose and Galactose Metabolism                   | 2065   | 225 | 1.00 | 0.00  | 0.9808 | 0.9865 |
| M267  | kyurenine                                              | Amino Acid             | Tryptophan Metabolism                                        | 2739   | 209 | 1.00 | 0.00  | 0.9784 | 0.9865 |
| M2927 | oleoyl-linoleoyl-glycerol (18:1/18:2) [2]              | Lipid                  | Diacylglycerol                                               | 3223   | 637 | 1.00 | 0.00  | 0.9777 | 0.9865 |
| M3118 | sphingomyelin (d18:1/17:0, d17:1/18:0, d19:1/16:0)     | Lipid                  | Sphingomyelins                                               | 2350   | 718 | 1.00 | 0.00  | 0.9824 | 0.9867 |
| M1902 | docosahexaenoylcarnitine (C22:6)*                      | Lipid                  | Fatty Acid Metabolism (Acyl Carnitine, Polyunsaturated)      | 1349   | 472 | 1.00 | 0.00  | 0.9843 | 0.9876 |
| M1696 | hexadecenedioate [C16:1-DC]*                           | Lipid                  | Fatty Acid, Dicarboxylate                                    | 4380   | 283 | 1.00 | 0.00  | 0.9874 | 0.9896 |
| M4967 | N-(2-furyl)glycine                                     | Xenobiotics            | Food Component/Plant                                         | 1525   | 168 | 1.01 | 0.02  | 0.9889 | 0.9900 |
| M1682 | decadienedioic acid (C10:2-DC)                         | Lipid                  | Fatty Acid, Dicarboxylate                                    | 2329.7 | 197 | 1.00 | 0.00  | 0.9940 | 0.9940 |

Supplementary data 2: UPLC-MS/MS metabolites in serum samples collected before the first NF

Compounds in column B for which no authentic standards were available for confirmation are marked with \* after the compound name to designate these as Metabolomics Standards Initiative level 2/3

Fold change and log2 (fold change) were based on samples preceding vs. not preceding NF within 24 hours

p values are from Welch's two-sample t-test. q values are derived from p values after FDR correction for multiple testing

Color coding in column E was applied along the fold change gradient, with blue and red representing decreased and increased levels in NF vs. non-NF samples, respectively

Color coding in column H was applied along the q value gradient, with darker colors indicating more significant values

| metabolite_code | metabolite                                             | pathway                           | sub_pathway                                                  | foldchange  | log2_foldchange | p           | q           |
|-----------------|--------------------------------------------------------|-----------------------------------|--------------------------------------------------------------|-------------|-----------------|-------------|-------------|
| M397            | 2-methylbutyrylcarnitine (C5)                          | Amino Acid                        | Leucine, Isoleucine and Valine Metabolism                    | 0.370871372 | -1.431009186    | 1.20E-08    | 1.09E-05    |
| M4120           | hypoxanthine                                           | Nucleotide                        | Purine Metabolism, (Hypo)Xanthine/Inosine containing         | 0.243273154 | -2.039350971    | 2.58E-07    | 7.82E-05    |
| M5              | sarcosine                                              | Amino Acid                        | Glycine, Serine and Threonine Metabolism                     | 0.406750167 | -1.297785157    | 1.78E-07    | 7.82E-05    |
| M116            | N6,N6,N6-trimethyllysine                               | Amino Acid                        | Lysine Metabolism                                            | 0.552392321 | -0.85623483     | 5.34E-07    | 0.000121337 |
| M4280           | 5,6-dihydrothymine                                     | Nucleotide                        | Pyrimidine Metabolism, Thymine containing                    | 0.051961552 | -4.266411671    | 1.70E-06    | 0.000308421 |
| M5410           | celecoxib                                              | Xenobiotics                       | Drug - Analgesics, Anesthetics                               | 0.999998843 | 2.27E-07        | 3.74E-06    | 0.00056603  |
| M1857           | nonanoylcarnitine (C9)                                 | Lipid                             | Fatty Acid Metabolism (Acyl Carnitine, Medium Chain)         | 0.290088206 | -1.78538672     | 4.76E-06    | 0.000517529 |
| M3058           | glycosyl-N-stearoyl-sphingosine (d18:1/18:0)           | Lipid                             | Hexosylceramides (HCEr)                                      | 0.449458773 | -1.153739307    | 6.06E-06    | 0.000688198 |
| M3082           | glycosyl ceramide (d18:2/24:1, d18:1/24:2)*            | Lipid                             | Hexosylceramides (HCEr)                                      | 0.291841408 | -1.7767435      | 7.82E-06    | 0.000790069 |
| M2905           | palmitoyl-oleoyl-glycerol (16:0/18:1) [2]*             | Lipid                             | Diacylglycerol                                               | 0.49678811  | -1.009297449    | 9.01E-06    | 0.000818917 |
| M544            | N-acetyl-isoputrescine                                 | Amino Acid                        | Polymine Metabolism                                          | 0.318530564 | -1.650496283    | 1.38E-05    | 0.001042433 |
| M4231           | 5,6-dihydrouracil                                      | Nucleotide                        | Pyrimidine Metabolism, Uracil containing                     | 0.164964834 | -2.599769578    | 1.33E-05    | 0.001042433 |
| M354            | isovalerylcarnitine (C5)                               | Amino Acid                        | Leucine, Isoleucine and Valine Metabolism                    | 0.532672993 | -0.908677957    | 1.57E-05    | 0.001097038 |
| M434            | methionine                                             | Amino Acid                        | Methionine, Cysteine, SAM and Taurine Metabolism             | 0.47471687  | -1.074860775    | 1.82E-05    | 0.001178733 |
| M4316           | 1-methylnicotinamide                                   | Cofactors and Vitamins            | Nicotinate and Nicotinamide Metabolism                       | 0.429048209 | -1.220788331    | 2.64E-05    | 0.001197985 |
| M527            | guanidinooacetate                                      | Amino Acid                        | Creatine Metabolism                                          | 0.300230855 | -1.735855843    | 2.04E-05    | 0.001197985 |
| M493            | homocysteine                                           | Amino Acid                        | Urea cycle; Arginine and Proline Metabolism                  | 0.243663811 | -2.037036097    | 2.25E-05    | 0.001197985 |
| M546            | N(1)-acetylpermidine                                   | Amino Acid                        | Pyrimidine Metabolism                                        | 0.141234672 | -2.823833791    | 2.45E-05    | 0.001197985 |
| M1890           | ximenoylcarnitine (C26:1)*                             | Lipid                             | Fatty Acid Metabolism (Acyl Carnitine, Monounsaturated)      | 0.073505094 | -3.766011962    | 2.60E-05    | 0.001197985 |
| M3081           | glycosyl ceramide (d18:1/23:1, d17:1/24:1)*            | Lipid                             | Hexosylceramides (HCEr)                                      | 0.147073723 | -2.765388589    | 2.32E-05    | 0.001197985 |
| M499            | N-acetylarginine                                       | Amino Acid                        | Urea cycle; Arginine and Proline Metabolism                  | 0.439374309 | -1.186477578    | 3.16E-05    | 0.001369683 |
| M3161           | sphingosine 1-phosphate                                | Lipid                             | Sphingosines                                                 | 0.607479757 | -0.719091759    | 6.41E-05    | 0.002648356 |
| M4121           | xanthine                                               | Nucleotide                        | Purine Metabolism, (Hypo)Xanthine/Inosine containing         | 0.065320593 | -3.936318307    | 9.77E-05    | 0.003861874 |
| M107            | N6-acetyllysine                                        | Amino Acid                        | Lysine Metabolism                                            | 0.444630609 | -1.169320826    | 0.000102923 | 0.003898219 |
| M2662           | 1-palmitoyl-GPE (16:0)                                 | Lipid                             | Lysophospholipid                                             | 0.463748204 | -1.108586399    | 0.000130229 | 0.004735125 |
| M7              | betaine                                                | Amino Acid                        | Glycine, Serine and Threonine Metabolism                     | 0.594468915 | -0.750326723    | 0.000138314 | 0.004835654 |
| M1160           | Fibrinopeptide A (4-15)                                | Peptide                           | Fibrinogen Cleavage Peptide                                  | 0.407298872 | -1.295840276    | 0.000149499 | 0.004855905 |
| M2904           | palmitoyl-oleoyl-glycerol (16:0/18:1) [1]*             | Lipid                             | Diacylglycerol                                               | 0.516937017 | -0.951939579    | 0.000151113 | 0.004855905 |
| M131            | pipicolate                                             | Amino Acid                        | Lysine Metabolism                                            | 0.3302405   | -1.598411036    | 0.000154919 | 0.004855905 |
| M3063           | glycosyl-N-nervonoyl-sphingosine (d18:1/24:1)*         | Lipid                             | Hexosylceramides (HCEr)                                      | 0.235330612 | -2.087239096    | 0.000163804 | 0.00496327  |
| M545            | spermidine                                             | Amino Acid                        | Polymine Metabolism                                          | 0.175998146 | -2.506387864    | 0.000201647 | 0.005912801 |
| M4931           | histidine betaine (herycine)*                          | Xenobiotics                       | Food Component/Plant                                         | 0.200469139 | -2.318547935    | 0.000226913 | 0.006454744 |
| M3363           | androstenediol (3beta,17beta) disulfate (1)            | Lipid                             | Androgenic Steroids                                          | 0.628207284 | -0.670687424    | 0.000286279 | 0.007855694 |
| M4219           | uridine                                                | Nucleotide                        | Pyrimidine Metabolism, Uracil containing                     | 0.492416133 | -1.022050064    | 0.000305253 | 0.008161023 |
| M4235           | 2'-deoxyuridine                                        | Nucleotide                        | Pyrimidine Metabolism, Uracil containing                     | 0.241595201 | -2.049336296    | 0.000317644 | 0.008249659 |
| M3192           | cholesterol                                            | Lipid                             | Sterol                                                       | 0.78385573  | -0.351339946    | 0.000343576 | 0.008642931 |
| M4182           | guanosine                                              | Nucleotide                        | Purine Metabolism, Guanine containing                        | 0.073260153 | -3.77082747     | 0.000361311 | 0.008642931 |
| M554            | N1,N12-diacylspermine                                  | Amino Acid                        | Polymine Metabolism                                          | 0.062085261 | -4.009605375    | 0.000361265 | 0.008642931 |
| M1976           | 2-hydroxynervonate*                                    | Lipid                             | Fatty Acid, Monohydroxy                                      | 0.639739737 | -0.644442997    | 0.000378215 | 0.008815328 |
| M5206           | tartronate (hydroxymalonate)                           | Xenobiotics                       | Food Component/Plant                                         | 0.374612026 | -1.416503229    | 0.000390763 | 0.008880096 |
| M1445           | alpha-ketoglutarate                                    | Energy                            | TCA Cycle                                                    | 0.778896864 | -0.360495786    | 0.00042781  | 0.009484852 |
| M440            | methionine sulfoxide                                   | Amino Acid                        | Methionine, Cysteine, SAM and Taurine Metabolism             | 0.485897395 | -1.041276396    | 0.000449938 | 0.009511484 |
| M31             | N-acetylalanine                                        | Amino Acid                        | Alanine and Aspartate Metabolism                             | 0.636000919 | -0.59161221     | 0.000441157 | 0.009511484 |
| M2670           | 2-stearoyl-GPE (18:0)*                                 | Lipid                             | Lysophospholipid                                             | 0.422828023 | -1.241857099    | 0.000488892 | 0.009719152 |
| M3386           | Salpha-androstan-3beta,17beta-diol disulfate           | Lipid                             | Androgenic Steroids                                          | 0.457846173 | -1.127065131    | 0.000476683 | 0.009719152 |
| M512            | N-methylhydroxyproline                                 | Amino Acid                        | Urea cycle; Arginine and Proline Metabolism                  | 0.164064994 | -2.607660646    | 0.000491838 | 0.009719152 |
| M3134           | palmitoyl-sphingosine-phosphoethanolamine (d18:1/16:0) | Lipid                             | Ceramide PEs                                                 | 0.851136164 | -0.232538143    | 0.000590463 | 0.011419799 |
| M6177           | 2,4-di-tert-butylphenol                                | Xenobiotics                       | Chemical                                                     | 0.776167736 | -0.365559631    | 0.000661697 | 0.01156698  |
| M498            | dimethylarginine (ADMA + SDMA)                         | Amino Acid                        | Urea cycle; Arginine and Proline Metabolism                  | 0.466746032 | -1.099290338    | 0.000613    | 0.01156698  |
| M650            | gamma-glutamyl-2-aminobutyrate                         | Peptide                           | Gamma-glutamyl Amino Acid                                    | 0.417709344 | -1.259428679    | 0.000661212 | 0.01156698  |
| M2907           | palmitoyl-linoleoyl-glycerol (16:0/18:2) [2]*          | Lipid                             | Diacylglycerol                                               | 0.595846182 | -0.746988149    | 0.000634908 | 0.01156698  |
| M137            | N,N-dimethyl-5-aminovalerate                           | Amino Acid                        | Lysine Metabolism                                            | 0.193554918 | -2.369185129    | 0.000655451 | 0.01156698  |
| M2833           | 1-(1-enyl-palmitoyl)-GPC (P-16:0)*                     | Lipid                             | Lysoplasmalogen                                              | 0.324808608 | -1.622338228    | 0.000713477 | 0.012010202 |
| M2233           | phosphocholine                                         | Lipid                             | Phospholipid Metabolism                                      | 0.652750391 | -0.615396679    | 0.000704992 | 0.012010202 |
| M3361           | androstenediol (3beta,17beta) monosulfate (2)          | Lipid                             | Androgenic Steroids                                          | 0.400671424 | -1.319508475    | 0.00076313  | 0.012612464 |
| M227            | N-formylphenylalanine                                  | Amino Acid                        | Tyrosine Metabolism                                          | 0.152121108 | -2.716707746    | 0.000782786 | 0.012706288 |
| M1889           | nervonoylcarnitine (C24:1)*                            | Lipid                             | Fatty Acid Metabolism (Acyl Carnitine, Monounsaturated)      | 0.400879055 | -1.318761052    | 0.000857621 | 0.01367688  |
| M2241           | glycerophosphoserine*                                  | Lipid                             | Phospholipid Metabolism                                      | 0.406959239 | -1.297043794    | 0.000902462 | 0.014143762 |
| M3103           | palmitoyl sphingomyelin (d18:1/16:0)                   | Lipid                             | Sphingomyelins                                               | 0.861623165 | -0.214871057    | 0.00093238  | 0.014364975 |
| M2669           | 1-stearoyl-GPE (18:0)                                  | Lipid                             | Lysophospholipid                                             | 0.509841667 | -0.971878811    | 0.000955362 | 0.014464393 |
| M2141           | 12-HETE                                                | Lipid                             | Eicosanoid                                                   | 0.053050387 | -4.236492924    | 0.000970658 | 0.014464393 |
| M4360           | alpha-tocopherol                                       | Cofactors and Vitamins            | Tocopherol Metabolism                                        | 0.784936571 | -0.349352016    | 0.001026988 | 0.015056962 |
| M5063           | stachydrine                                            | Xenobiotics                       | Food Component/Plant                                         | 0.283894395 | -1.816573727    | 0.00110546  | 0.015950203 |
| M580            | 2-aminobutyrate                                        | Amino Acid                        | Glutathione Metabolism                                       | 0.444515817 | -1.16969334     | 0.00126653  | 0.017948936 |
| M1869           | lignocercylcarnitine (C24)*                            | Lipid                             | Fatty Acid Metabolism (Acyl Carnitine, Long Chain Saturated) | 0.43864793  | -1.188864636    | 0.001283477 | 0.017948936 |
| M11             | N-acetyserine                                          | Amino Acid                        | Glycine, Serine and Threonine Metabolism                     | 0.432929991 | -1.20779435     | 0.001370637 | 0.018877414 |
| M518            | N-methylproline                                        | Amino Acid                        | Urea cycle; Arginine and Proline Metabolism                  | 0.123868663 | -3.013137803    | 0.001417823 | 0.019235833 |
| M2842           | glycerol 3-phosphate                                   | Lipid                             | Glycerolipid Metabolism                                      | 0.478198326 | -1.064319016    | 0.001456907 | 0.019475419 |
| M6422           | metablonic lactone sulfate                             | Partially Characterized Molecules | Partially Characterized Molecules                            | 0.511546413 | -0.967062951    | 0.001541687 | 0.020310044 |
| M2866           | 1-docosahexaenoyl-glycerol (22:6)                      | Lipid                             | Monocacylglycerol                                            | 0.395369601 | -1.338726144    | 0.001608625 | 0.02060928  |
| M556            | 5-methylthioadenosine (MTA)                            | Amino Acid                        | Polymine Metabolism                                          | 0.588662902 | -0.764486385    | 0.001609746 | 0.02060928  |
| M387            | N-acetylisoleucine                                     | Amino Acid                        | Leucine, Isoleucine and Valine Metabolism                    | 0.583760141 | -0.776552387    | 0.00169578  | 0.021409228 |
| M40             | asparagine                                             | Amino Acid                        | Alanine and Aspartate Metabolism                             | 0.530752898 | -0.913887751    | 0.00183152  | 0.022427549 |
| M642            | gamma-glutamylmethionine                               | Peptide                           | Gamma-glutamyl Amino Acid                                    | 0.376265038 | -1.410178852    | 0.001899083 | 0.022427549 |
| M3091           | lactosyl-N-nervonoyl-sphingosine (d18:1/24:1)*         | Lipid                             | Lactosylceramides (LCER)                                     | 0.38574133  | -1.374294364    | 0.001829684 | 0.022427549 |
| M4241           | N-acetyl-beta-alanine                                  | Nucleotide                        | Pyrimidine Metabolism, Uracil containing                     | 0.458407184 | -1.125298442    | 0.001875981 | 0.022427549 |
| M6241           | perfluorooctanoate (PF0A)                              | Xenobiotics                       | Chemical                                                     | 0.653182187 | -0.614442646    | 0.001868975 | 0.022427549 |
| M1865           | margaroylcarnitine (C17)*                              | Lipid                             | Fatty Acid Metabolism (Acyl Carnitine, Long Chain Saturated) | 0.365613013 | -1.451610675    | 0.002234522 | 0.025498916 |
| M109            | N2-acetyl,N6-methyllysine                              | Amino Acid                        | Lysine Metabolism                                            | 0.379975215 | -1.396022778    | 0.002244129 | 0.025498916 |
| M4353           | threonate                                              | Cofactors and Vitamins            | Ascorbate and Aldarate Metabolism                            | 0.609833285 | -0.7135132      | 0.002201888 | 0.025498916 |
| M2240           | glycerophosphoethanolamine                             | Lipid                             | Phospholipid Metabolism                                      | 0.494135866 | -1.017020319    | 0.002303001 | 0.025690348 |
| M272            | lyxurinate                                             | Amino Acid                        | Tryptophan Metabolism                                        | 0.675868804 | -0.565184869    | 0.002317501 | 0.025690348 |
| M1971           | 2-hydroxystearate                                      | Lipid                             | Fatty Acid, Monohydroxy                                      | 0.82380973  | -0.279616928    | 0.002510325 | 0.027165299 |
| M44             | glutamate                                              | Amino Acid                        | Glutamate Metabolism                                         | 0.773928641 | -0.369727544    | 0.002508866 | 0.027165299 |
| M2852           | 1-palmitoleoyl-glycerol (16:1)*                        | Lipid                             | Monocacylglycerol                                            | 0.285474159 | -1.808567937    | 0.00262644  | 0.027760862 |
| M16             | 2-methylserine                                         | Amino Acid                        | Glycine, Serine and Threonine Metabolism                     | 0.507030458 | -0.97985568     | 0.002597582 | 0.027760862 |
| M2914           | palmitoyl-arachidonoyl-glycerol (16:0/20:4) [2]*       | Lipid                             | Diacylglycerol                                               | 0.473564389 | -1.078367496    | 0.002767275 | 0.028913254 |
| M5044           | 5-allylcysteine                                        | Xenobiotics                       | Food Component/Plant                                         | 0.189956907 | -2.396255921    | 0.002919037 | 0.030152323 |
| M56             | beta-citrylglutamate                                   | Amino Acid                        | Glutamate Metabolism                                         | 0.420687194 | -1.249180191    | 0.003039005 | 0.031038831 |
| M2711           | 1-stearoyl-GPG (18:0)                                  | Lipid                             | Lysophospholipid                                             | 0.143090672 | -2.804998466    | 0.003207656 | 0.032397327 |
| M438            | 5-methylmethionine                                     | Amino Acid                        | Methionine, Cysteine, SAM and Taurine Metabolism             | 0.22844886  | -2.130056852    | 0.003290103 | 0.032864878 |
| M4119           | inosine                                                | Nucleotide                        | Purine Metabolism, (Hypo)Xanthine/Inosine containing         | 0.14300875  | -2.805824674    | 0.003424883 | 0.033839337 |
| M4601           | 3-methylxanthine                                       |                                   |                                                              |             |                 |             |             |

|       |                                                     |                                   |                                                              |              |              |             |             |
|-------|-----------------------------------------------------|-----------------------------------|--------------------------------------------------------------|--------------|--------------|-------------|-------------|
| M4256 | N4-acetylcytidine                                   | Nucleotide                        | Pyrimidine Metabolism, Cytidine containing                   | 0.623093705  | -0.682478953 | 0.005747415 | 0.047066669 |
| M3209 | 3beta-hydroxy-5-cholestenate                        | Lipid                             | Sterol                                                       | 0.46930891   | -1.091390245 | 0.006281616 | 0.050087621 |
| M4816 | alliin                                              | Xenobiotics                       | Food Component/Plant                                         | 0.266599102  | -1.907256172 | 0.006205251 | 0.050087621 |
| M504  | N-acetylcitrulline                                  | Amino Acid                        | Urea cycle; Arginine and Proline Metabolism                  | 0.263723738  | -1.922906966 | 0.006228045 | 0.050087621 |
| M1219 | N,N-dimethyl-pro-pro                                | Peptide                           | Modified Peptides                                            | 0.533525947  | -0.906369656 | 0.006891995 | 0.054476723 |
| M2802 | 1-(1-enyl-palmitoyl)-2-palmitoyl-GPC (P-16:0/16:0)* | Lipid                             | Plasmalogen                                                  | 0.46007206   | -1.12006825  | 0.007878593 | 0.060181855 |
| M2454 | 1-linoleoyl-2-arachidonoyl-GPE (18:2/20:4)*         | Lipid                             | Phosphatidylethanolamine (PE)                                | 0.672955721  | -0.571416514 | 0.007800109 | 0.060181855 |
| M48   | N-acetylglutamine                                   | Amino Acid                        | Glutamate Metabolism                                         | 0.50691138   | -0.980194544 | 0.007820061 | 0.060181855 |
| M17   | threonine                                           | Amino Acid                        | Glycine, Serine and Threonine Metabolism                     | 0.406605015  | -1.298300084 | 0.00768682  | 0.060181855 |
| M3000 | sphinganine                                         | Lipid                             | Sphingolipid Synthesis                                       | 0.171968906  | -2.539772812 | 0.008188564 | 0.06208369  |
| M2999 | 3-ketosphinganine                                   | Lipid                             | Sphingolipid Synthesis                                       | 0.056015066  | -4.158041272 | 0.008288298 | 0.06226498  |
| M641  | gamma-glutamyl-epsilon-lysine                       | Peptide                           | Gamma-glutamyl Amino Acid                                    | 0.65688433   | -0.606288746 | 0.008562209 | 0.063276811 |
| M2913 | palmitoyl-arachidonoyl-glycerol (16:0/20:4) [1]*    | Lipid                             | Diacylglycerol                                               | 0.660369248  | -0.598655156 | 0.008496629 | 0.063276811 |
| M2861 | 1-dihomo-linolenyl-glycerol (20:3)                  | Lipid                             | Monooacylglycerol                                            | 0.649365847  | -0.622890586 | 0.008822925 | 0.063551105 |
| M640  | gamma-glutamyl-alpha-lysine                         | Peptide                           | Gamma-glutamyl Amino Acid                                    | 0.38864791   | -1.363464338 | 0.008783923 | 0.063551105 |
| M636  | gamma-glutamylglycine                               | Peptide                           | Gamma-glutamyl Amino Acid                                    | 0.465284887  | -1.103813767 | 0.008703074 | 0.063551105 |
| M647  | gamma-glutamylvaline                                | Peptide                           | Gamma-glutamyl Amino Acid                                    | 0.861442449  | -0.215173679 | 0.009026231 | 0.063714105 |
| M55   | N-acetyl-aspartyl-glutamate (NAAG)                  | Amino Acid                        | Glutamate Metabolism                                         | 0.557686835  | -0.842472888 | 0.009041936 | 0.063714105 |
| M2196 | N-oleoyserine                                       | Lipid                             | Endocannabinoid                                              | 0.6328544    | -0.660054477 | 0.008978666 | 0.063714105 |
| M2862 | 1-arachidonyl-glycerol (20:4)                       | Lipid                             | Monooacylglycerol                                            | 0.520559654  | -0.941864594 | 0.009220539 | 0.064472848 |
| M4164 | N6-carbamoylthreonyladenosine                       | Nucleotide                        | Purine Metabolism, Adenine containing                        | 0.695727554  | -0.523405635 | 0.009373538 | 0.065042337 |
| M3087 | lactosyl-N-palmitoyl-sphingosine (d18:1/16:0)       | Lipid                             | Lactosylceramides (LCER)                                     | 0.34249804   | -1.545832364 | 0.009474357 | 0.065243867 |
| M1831 | 3-hydroxybutyrylglycine                             | Lipid                             | Fatty Acid Metabolism (Acyl Glycine)                         | 0.514689337  | -0.958226202 | 0.009801874 | 0.066991755 |
| M232  | choline                                             | Lipid                             | Phospholipid Metabolism                                      | 0.605667352  | -0.723402449 | 0.010013999 | 0.067930787 |
| M5005 | piprine                                             | Xenobiotics                       | Food Component/Plant                                         | 0.359007677  | -1.477913399 | 0.010142737 | 0.068294428 |
| M1771 | propionylcarnitine (C3)                             | Lipid                             | Fatty Acid Metabolism (also BCAA Metabolism)                 | 0.715347974  | -0.483282897 | 0.01030247  | 0.068859889 |
| M1648 | (16 or 17)-methylstearate (a19:0 or i19:0)          | Lipid                             | Fatty Acid, Branched                                         | 0.653395002  | -0.613972675 | 0.010669119 | 0.070789991 |
| M4602 | 7-methylxanthine                                    | Xenobiotics                       | Xanthine Metabolism                                          | 0.407064559  | -1.29667076  | 0.010942182 | 0.072075677 |
| M6    | dimethylglycine                                     | Amino Acid                        | Glycine, Serine and Threonine Metabolism                     | 0.530742514  | -0.913915978 | 0.011172073 | 0.073060537 |
| M105  | lysine                                              | Amino Acid                        | Lysine Metabolism                                            | 0.572523223  | -0.804593882 | 0.011302944 | 0.073388398 |
| M2836 | 1-(1-enyl-oleoyl)-GPE (P-18:1)*                     | Lipid                             | Lysoplasmalogen                                              | 0.532710013  | -0.908577697 | 0.011563739 | 0.074546889 |
| M4356 | oxalate (ethanedioate)                              | Cofactors and Vitamins            | Ascorbate and Aldarate Metabolism                            | 0.555155719  | -0.849035596 | 0.012827418 | 0.082133542 |
| M4206 | dihydroorotate                                      | Nucleotide                        | Pyrimidine Metabolism, Orotate containing                    | 0.265553006  | -1.912928232 | 0.013544023 | 0.086094525 |
| M437  | N-formylmethionine                                  | Amino Acid                        | Methionine, Cysteine, SAM and Taurine Metabolism             | 0.719172003  | -0.475591236 | 0.013974421 | 0.087605166 |
| M3001 | sphinganine-1-phosphate                             | Lipid                             | Sphingolipid Synthesis                                       | 0.745316458  | -0.424074977 | 0.013949822 | 0.087605166 |
| M2942 | linoleoyl-arachidonoyl-glycerol (18:2/20:4) [2]*    | Lipid                             | Diacylglycerol                                               | 0.637057348  | -0.650504846 | 0.01412776  | 0.087959823 |
| M638  | gamma-glutamylisoleucine*                           | Peptide                           | Gamma-glutamyl Amino Acid                                    | 0.548572933  | -0.866233189 | 0.014266562 | 0.088219763 |
| M4283 | 3-aminoisobutyrate                                  | Nucleotide                        | Pyrimidine Metabolism, Thymine containing                    | 0.083652199  | -3.579452724 | 0.014878955 | 0.09020394  |
| M1840 | acetyl carnitine (C2)                               | Lipid                             | Fatty Acid Metabolism (Acyl Carnitine, Short Chain)          | 0.724532266  | -0.464876164 | 0.014885139 | 0.09020394  |
| M519  | N,N,N-trimethyl-alanylproline betaine (TMAP)        | Amino Acid                        | Urea cycle; Arginine and Proline Metabolism                  | 0.4415602448 | -1.166170937 | 0.014752015 | 0.09020394  |
| M4221 | pseudouridine                                       | Nucleotide                        | Pyrimidine Metabolism, Uracil containing                     | 0.767162026  | -0.382396785 | 0.016313414 | 0.098204594 |
| M3068 | glycosyl-N-behenoyl-sphingadineine (d18:2/22:0)*    | Lipid                             | Hexosylceramides (HCEr)                                      | 0.485722802  | -1.04179488  | 0.016674527 | 0.099341762 |
| M4220 | uracil                                              | Nucleotide                        | Pyrimidine Metabolism, Uracil containing                     | 0.346876153  | -1.527507432 | 0.016720891 | 0.099341762 |
| M1866 | stearoyl carnitine (C18)                            | Lipid                             | Fatty Acid Metabolism (Acyl Carnitine, Long Chain Saturated) | 0.389268622  | -1.361162038 | 0.016931315 | 0.099938736 |
| M4893 | ergothioneine                                       | Xenobiotics                       | Food Component/Plant                                         | 0.519915386  | -0.943651245 | 0.017217587 | 0.100325555 |
| M471  | taurine                                             | Amino Acid                        | Methionine, Cysteine, SAM and Taurine Metabolism             | 0.548360693  | -0.866802934 | 0.017113865 | 0.100325555 |
| M4223 | 2'-O-methyluridine                                  | Nucleotide                        | Pyrimidine Metabolism, Uracil containing                     | 0.397600867  | -1.330607193 | 0.018371355 | 0.106058448 |
| M829  | glycylalnine                                        | Peptide                           | Dipeptide                                                    | 0.214195027  | -2.223003111 | 0.018434802 | 0.106058448 |
| M123  | 2-aminoadipate                                      | Amino Acid                        | Lysine Metabolism                                            | 0.609711257  | -0.713801912 | 0.018806957 | 0.10694471  |
| M457  | 5-methylcysteine                                    | Amino Acid                        | Methionine, Cysteine, SAM and Taurine Metabolism             | 0.638947356  | -0.646231025 | 0.018824511 | 0.10694471  |
| M4264 | 2'-O-methylcytidine                                 | Nucleotide                        | Pyrimidine Metabolism, Cytidine containing                   | 0.382859155  | -1.385114341 | 0.019233427 | 0.108591211 |
| M93   | 1-methyl-5-imidazoleacetate                         | Amino Acid                        | Histidine Metabolism                                         | 1.533077004  | 0.616430163  | 0.019408597 | 0.108903794 |
| M1136 | glu-gly-asn-val                                     | Peptide                           | Polypeptide                                                  | 0.252800551  | -1.983928489 | 0.020640138 | 0.115103591 |
| M1870 | cerotyl carnitine (C26)*                            | Lipid                             | Fatty Acid Metabolism (Acyl Carnitine, Long Chain Saturated) | 0.316684285  | -1.658882871 | 0.022383784 | 0.1233143   |
| M3167 | hexadecaspingosine (d16:1)*                         | Lipid                             | Sphingosines                                                 | 0.133975697  | -2.899956773 | 0.02230275  | 0.1233143   |
| M4126 | N1-methylinosine                                    | Nucleotide                        | Purine Metabolism, (Hypo)Xanthine/Inosine containing         | 0.74541357   | -0.423887011 | 0.022656291 | 0.124063666 |
| M4222 | 5,6-dihydrouridine                                  | Nucleotide                        | Pyrimidine Metabolism, Uracil containing                     | 0.796208886  | -0.328781123 | 0.022840266 | 0.124322169 |
| M551  | acisoga                                             | Amino Acid                        | Polyamine Metabolism                                         | 0.398526961  | -1.327250767 | 0.023727499 | 0.128382718 |
| M1700 | octadecadienedioate (C18:2-DC)*                     | Lipid                             | Fatty Acid, Dicarboxylate                                    | 0.462770922  | -1.111629878 | 0.026126679 | 0.139700892 |
| M400  | tiglyl carnitine (C5)                               | Amino Acid                        | Leucine, Isoleucine and Valine Metabolism                    | 0.355867018  | -1.490589866 | 0.026121392 | 0.139700892 |
| M2871 | 2-oleoyl-glycerol (18:1)                            | Lipid                             | Monooacylglycerol                                            | 0.387297787  | -1.368484836 | 0.026434934 | 0.140522543 |
| M1951 | docosahexaenoylcholine                              | Lipid                             | Fatty Acid Metabolism (Acyl Choline)                         | 0.380960832  | -1.39228542  | 0.027294635 | 0.144288973 |
| M3057 | glycosyl-N-palmitoyl-sphingosine (d18:1/16:0)       | Lipid                             | Hexosylceramides (HCEr)                                      | 0.492445191  | -1.021964933 | 0.027629006 | 0.145172062 |
| M2686 | 1-arachidonoyl-GPE (20:4n6)*                        | Lipid                             | Lysoosphospholipid                                           | 0.544409983  | -0.877234978 | 0.028496583 | 0.148870081 |
| M1569 | linolenate (18:3n3 or 3n6)                          | Lipid                             | Long Chain Polyunsaturated Fatty Acid (n3 and n6)            | 0.650752571  | -0.619818988 | 0.028925211 | 0.150245812 |
| M2034 | 2R,3R-dihydroxybutyrate                             | Lipid                             | Fatty Acid, Dihydrory                                        | 0.77463393   | -0.368413401 | 0.02966543  | 0.1522535   |
| M6204 | triethanolamine                                     | Xenobiotics                       | Chemical                                                     | 0.010124221  | -6.626045283 | 0.029583099 | 0.1522535   |
| M1867 | arachidyl carnitine (C20)*                          | Lipid                             | Fatty Acid Metabolism (Acyl Carnitine, Long Chain Saturated) | 0.43053476   | -1.215798374 | 0.030167641 | 0.154058346 |
| M453  | cystathionine                                       | Amino Acid                        | Methionine, Cysteine, SAM and Taurine Metabolism             | 0.4612147544 | -1.116386865 | 0.030655589 | 0.154817949 |
| M6452 | glutamine_degradant*                                | Partially Characterized Molecules | Partially Characterized Molecules                            | 0.559212388  | -0.838531775 | 0.03065702  | 0.154817949 |
| M1562 | docosapentaenoate (DPA; 22:5n3)                     | Lipid                             | Long Chain Polyunsaturated Fatty Acid (n3 and n6)            | 0.600838577  | -0.734950651 | 0.031875313 | 0.158940627 |
| M83   | imidazole lactate                                   | Amino Acid                        | Histidine Metabolism                                         | 0.772827171  | -0.371782278 | 0.031823096 | 0.158940627 |
| M1902 | docosahexaenoyl carnitine (C22:6)*                  | Lipid                             | Fatty Acid Metabolism (Acyl Carnitine, Polyunsaturated)      | 0.681166052  | -0.55392156  | 0.033721486 | 0.166608776 |
| M1    | glycine                                             | Amino Acid                        | Glycine, Serine and Threonine Metabolism                     | 0.558721393  | -0.839799034 | 0.033724989 | 0.166608776 |
| M1932 | carnitine                                           | Lipid                             | Carnitine Metabolism                                         | 0.691152093  | -0.532924874 | 0.035030832 | 0.172124468 |
| M2838 | 1-(1-enyl-stearoyl)-GPE (P-18:0)*                   | Lipid                             | Lysoplasmalogen                                              | 0.530113399  | -0.915627089 | 0.035435652 | 0.173157289 |
| M2173 | N-stearoyltaurine                                   | Endocannabinoid                   | Endocannabinoid                                              | 0.596931096  | -0.744363684 | 0.035622017 | 0.173157289 |
| M4559 | o-cresol sulfate                                    | Xenobiotics                       | Benzoate Metabolism                                          | 0.403332467  | -1.309958551 | 0.036401385 | 0.176004571 |
| M121  | fructosyllysine                                     | Amino Acid                        | Lysine Metabolism                                            | 0.613692958  | -0.704411065 | 0.03707388  | 0.178307709 |
| M2857 | 1-linolenyl-glycerol (18:3)                         | Lipid                             | Monooacylglycerol                                            | 0.532261578  | -0.909792667 | 0.038528904 | 0.181465149 |
| M4254 | 3-methylcytidine                                    | Nucleotide                        | Pyrimidine Metabolism, Cytidine containing                   | 0.756967796  | -0.40169617  | 0.038455254 | 0.181465149 |
| M1443 | isocitrate                                          | Energy                            | TCA Cycle                                                    | 0.810020985  | -0.303968811 | 0.038345682 | 0.181465149 |
| M2937 | stearoyl-arachidonoyl-glycerol (18:0/20:4) [1]*     | Lipid                             | Diacylglycerol                                               | 0.830620883  | -0.267737951 | 0.039789477 | 0.181465149 |
| M1698 | octadecanedioate (C18)                              | Lipid                             | Fatty Acid, Dicarboxylate                                    | 0.635555009  | -0.653911095 | 0.039776801 | 0.186376865 |
| M4252 | cytosine                                            | Nucleotide                        | Pyrimidine Metabolism, Cytidine containing                   | 0.414001267  | -1.272292911 | 0.04142576  | 0.191928754 |
| M3078 | glycosyl ceramide (d18:1/20:0, d16:1/22:0)*         | Lipid                             | Hexosylceramides (HCEr)                                      | 0.647011343  | -0.628137079 | 0.041306594 | 0.191928754 |
| M115  | N6,N6-dimethyllysine                                | Amino Acid                        | Lysine Metabolism                                            | 0.358678096  | -1.47923845  | 0.04159512  | 0.191928754 |
| M1950 | stearoylcholine*                                    | Lipid                             | Fatty Acid Metabolism (Acyl Choline)                         | 0.41381761   | -1.272933053 | 0.041834844 | 0.192059963 |
| M1509 | pentadecanoate (15:0)                               | Lipid                             | Long Chain Saturated Fatty Acid                              | 0.644826234  | -0.624095609 | 0.042525662 | 0.194312773 |
| M573  | cystine-gluthathione disulfide                      | Amino Acid                        | Glutathione Metabolism                                       | 0.355665727  | -1.491406137 | 0.043439685 | 0.196451111 |
| M1563 | docosahexaenoate (DHA; 22:6n3)                      | Lipid                             | Long Chain Polyunsaturated Fatty Acid (n3 and n6)            | 0.848857101  | -0.76499085  | 0.043349325 | 0.196451111 |
| M1856 | cis-3,4-methyleneheptanoyl carnitine                | Lipid                             | Fatty Acid Metabolism (Acyl Carnitine, Medium Chain)         | 0.720053191  | -0.478246111 | 0.044609005 | 0.200740522 |
| M2806 | 1-(1-enyl-palmitoyl)-2-oleoyl-GPC (P-16:0/18:1)*    | Lipid                             | Plasmalogen                                                  | 0.638552145  | -0.647123658 | 0.045317081 | 0.202529564 |
| M644  | gamma-glutamylthreonine                             | Peptide                           | Gamma-glutamyl Amino Acid                                    | 0.410836798  | -1.283362689 | 0.046110729 | 0.20446172  |
| M3032 | N-stearoyl-sphingadineine (d18:2/18:0)*             | Lipid                             | Ceramides                                                    | 0.828188084  | -0.27196965  | 0.045931108 | 0.20446172  |
| M1547 | erucate (22:1n9)                                    | Lipid                             | Long Chain Monounsaturated Fatty Acid                        | 0.632262518  | -0.661404398 | 0.047122993 | 0.205894389 |
| M635  | gamma-glutamylglutamine                             | Peptide                           | Gamma-glutamyl Amino Acid                                    | 0.594308992  | -0.750714885 | 0.04679283  | 0.205894389 |
| M385  | isoleucine                                          | Amino Acid                        | Leucine, Isoleucine and Valine Metabolism                    | 0.655124336  | -0.610159353 | 0.047339854 | 0.205894389 |
| M1472 | malonate                                            | Lipid                             | Fatty Acid Synthesis                                         | 0.784909518  | -0.349401741 | 0.047060192 | 0.205894389 |
| M491  | 2-oxoarginine*                                      | Amino Acid                        | Urea cycle; Arginine and Proline Metabolism                  | 0.398407554  | -1.327683094 | 0.04764399  | 0.206230413 |
| M33   | N,N-dimethylalanine                                 | Amino Acid                        | Alanine and Aspartate Metabolism                             | 0.51166215   | -0.966736579 | 0.049160211 | 0.211128512 |
| M42   | N-acetylaspargine                                   | Amino Acid                        | Alanine and Aspartate Metabolism                             | 0.692749779  | -0.529593748 | 0.049240093 | 0.211128512 |
| M4207 | orotate                                             | Nucleotide                        | Pyrimidine Metabolism, Orotate containing                    | 0.305116669  | -1.712567098 | 0.050021309 | 0.213471219 |
| M5090 | methyl glucopyranoside (alpha + beta)               | Xenobiotics                       | Food Component/Plant                                         | 0.338697771  | -1.561929604 | 0.050839082 | 0.215907849 |
| M2201 | myo-inositol                                        | Lipid                             | Inositol Metabolism                                          | 0.506701883  | -0.980790904 | 0.051067313 | 0.215907849 |
| M2855 | 1-oleoyl-glycerol (18:1)                            | Lipid                             | Monooacylglycerol                                            | 0.447458259  | -1.160174989 | 0.051531682 | 0.215997711 |
| M1663 | 2-hydroxyglutarate                                  | Lipid                             | Fatty Acid, Dicarboxylate                                    | 0.275204304  | -1.861425006 | 0.05156381  | 0.215997711 |
| M3208 | 3beta,7alpha-dihydroxy-5-cholestenate               | Lipid                             | Sterol                                                       | 0.683769802  | -0.548417387 | 0.053147092 | 0.22069576  |
| M495  | proline                                             | Amino Acid                        | Urea cycle; Arginine and Proline Metabolism                  | 0.546024428  | -0.872962598 | 0.053170926 | 0.22069576  |
| M270  | N-acetylkynurenine (2)                              | Amino Acid                        | Tryptophan Metabolism                                        | 0.614850323  | -0.701692845 | 0.05341635  |             |

|       |                                                              |                                   |                                                              |             |              |             |             |
|-------|--------------------------------------------------------------|-----------------------------------|--------------------------------------------------------------|-------------|--------------|-------------|-------------|
| M4324 | N1-Methyl-2-pyridone-5-carboxamide                           | Cofactors and Vitamins            | Nicotinate and Nicotinamide Metabolism                       | 0.582221207 | -0.780360704 | 0.058884305 | 0.233377265 |
| M1642 | (14 or 15)-methylpalmitate (a17:0 or i17:0)                  | Lipid                             | Fatty Acid, Branched                                         | 0.680709312 | -0.554889249 | 0.062875045 | 0.234345747 |
| M2803 | 1-(1-enyl-palmitoyl)-2-palmitoleoyl-GPC (P-16:0/16:1)*       | Lipid                             | Plasmalogen                                                  | 0.501360234 | -0.996080525 | 0.06024232  | 0.234345747 |
| M2444 | 1-oleoyl-2-linoleoyl-GPE (18:1/18:2)*                        | Lipid                             | Phosphatidylethanolamine (PE)                                | 0.796653843 | -0.327975106 | 0.062904689 | 0.234345747 |
| M2281 | 1-palmitoyl-2-stearoyl-GPC (16:0/18:0)                       | Lipid                             | Phosphatidylcholine (PC)                                     | 0.729213853 | -0.455586126 | 0.061540245 | 0.234345747 |
| M4238 | 3-ureidopropionate                                           | Nucleotide                        | Pyrimidine Metabolism, Uracil containing                     | 0.459110527 | -1.123086582 | 0.062604182 | 0.234345747 |
| M3380 | Salpha-androstan-3alpha,17beta-diol disulfate                | Lipid                             | Androgenic Steroids                                          | 0.443359451 | -1.173451266 | 0.061119922 | 0.234345747 |
| M3315 | cortisone                                                    | Lipid                             | Corticosteroids                                              | 1.770111911 | 0.823840574  | 0.062760397 | 0.234345747 |
| M1887 | eicosenoylcarnitine (C20:1)*                                 | Lipid                             | Fatty Acid Metabolism (Acyl Carnitine, Monounsaturated)      | 0.429057062 | -1.220758563 | 0.062198419 | 0.234345747 |
| M45   | glutamine                                                    | Amino Acid                        | Glutamate Metabolism                                         | 0.616167811 | -0.698604777 | 0.061169506 | 0.234345747 |
| M417  | N-acetylvaline                                               | Amino Acid                        | Leucine, Isoleucine and Valine Metabolism                    | 0.64449649  | -0.633755593 | 0.061304001 | 0.234345747 |
| M1864 | palmitoylcarnitine (C16)                                     | Lipid                             | Fatty Acid Metabolism (Acyl Carnitine, Long Chain Saturated) | 0.553163737 | -0.854221511 | 0.062779121 | 0.234345747 |
| M3105 | stearoyl sphingomyelin (d18:1/18:0)                          | Lipid                             | Sphingomyelins                                               | 0.832927697 | -0.263736828 | 0.059694148 | 0.234345747 |
| M78   | trans-uracinate                                              | Amino Acid                        | Histidine Metabolism                                         | 0.490982038 | -1.026257847 | 0.060059419 | 0.234345747 |
| M4604 | 5-acetylamino-6-formylamino-3-methyluracil                   | Xenobiotics                       | Xanthine Metabolism                                          | 0.520042655 | -0.943298107 | 0.060735444 | 0.234345747 |
| M2888 | diacylglycerol (14:0/18:1, 16:0/16:1) [2]*                   | Lipid                             | Diacylglycerol                                               | 0.403924208 | -1.307843481 | 0.061330764 | 0.234345747 |
| M140  | phenylalanine                                                | Amino Acid                        | Phenylalanine Metabolism                                     | 0.781037957 | -0.356535432 | 0.063193489 | 0.234460741 |
| M426  | isobutyrylcarnitine (C4)                                     | Amino Acid                        | Leucine, Isoleucine and Valine Metabolism                    | 0.621856556 | -0.685346262 | 0.065239488 | 0.240091879 |
| M1516 | nonadecanoate (19:0)                                         | Lipid                             | Long Chain Saturated Fatty Acid                              | 0.791544466 | -0.337257696 | 0.065183049 | 0.240091879 |
| M2813 | 1-(1-enyl-palmitoyl)-2-arachidonoyl-GPC (P-16:0/20:4)*       | Lipid                             | Plasmalogen                                                  | 0.583772708 | -0.776521331 | 0.067225844 | 0.245735446 |
| M224  | dopamine 3-O-sulfate                                         | Amino Acid                        | Tyrosine Metabolism                                          | 0.503062059 | -0.991191709 | 0.06731367  | 0.245735446 |
| M649  | gamma-glutamylcitrulline*                                    | Peptide                           | Gamma-glutamyl Amino Acid                                    | 0.592694243 | -0.75464005  | 0.069367398 | 0.252198599 |
| M254  | tryptophan                                                   | Amino Acid                        | Tryptophan Metabolism                                        | 0.824854333 | -0.27778873  | 0.069845663 | 0.252947044 |
| M2814 | 1-(1-enyl-palmitoyl)-2-linoleoyl-GPC (P-16:0/18:2)*          | Lipid                             | Plasmalogen                                                  | 0.688280906 | -0.538930607 | 0.071431826 | 0.253638789 |
| M1643 | cis-3,4-methyleneheptanoate                                  | Lipid                             | Fatty Acid, Branched                                         | 0.621604341 | -0.685931515 | 0.070392843 | 0.253638789 |
| M1240 | lactate                                                      | Carbohydrate                      | Glycolysis, Gluconeogenesis, and Pyruvate Metabolism         | 0.79900873  | -0.323716828 | 0.07122411  | 0.253638789 |
| M3261 | pregnenetriol sulfate*                                       | Lipid                             | Pregnenolone Steroids                                        | 2.327371906 | 1.218701767  | 0.07097556  | 0.253638789 |
| M3310 | tetrahydrocortisol glucuronide                               | Lipid                             | Corticosteroids                                              | 3.66839087  | 1.875147367  | 0.071263836 | 0.253638789 |
| M2938 | stearoyl-arachidonoyl-glycerol (18:0/20:4) [2]*              | Lipid                             | Diacylglycerol                                               | 0.493889109 | -1.01771465  | 0.071838204 | 0.254089213 |
| M127  | glutaryl carnitine (C5-DC)                                   | Amino Acid                        | Lysine Metabolism                                            | 0.716170782 | -0.481624433 | 0.072172834 | 0.254283357 |
| M3305 | cortisol                                                     | Lipid                             | Corticosteroids                                              | 1.8955619   | 0.922625569  | 0.073302052 | 0.257264732 |
| M2856 | 1-linoleoylglycerol (18:2)                                   | Lipid                             | Monooacylglycerol                                            | 0.508805869 | -0.974812782 | 0.074566041 | 0.260694352 |
| M4300 | quinolinate                                                  | Cofactors and Vitamins            | Nicotinate and Nicotinamide Metabolism                       | 0.493044204 | -1.020211098 | 0.075704071 | 0.263659007 |
| M2889 | diacylglycerol (16:1/18:2 [2], 16:0/18:3 [1])*               | Lipid                             | Diacylglycerol                                               | 0.584161906 | -0.775559813 | 0.076349077 | 0.263883312 |
| M3090 | lactosyl-N-behenoyl-sphingosine (d18:1/22:0)*                | Lipid                             | Lactosylceramides (LCER)                                     | 0.731832259 | -0.450415085 | 0.076097805 | 0.263883312 |
| M2834 | 1-(1-enyl-palmitoyl)-GPE (P-16:0)*                           | Lipid                             | Lysoplasmalogen                                              | 0.577600205 | -0.791856841 | 0.077617056 | 0.264246832 |
| M646  | gamma-glutamyltyrosine                                       | Peptide                           | Gamma-glutamyl Amino Acid                                    | 0.557423225 | -0.843154916 | 0.077611016 | 0.264246832 |
| M1512 | margarate (17:0)                                             | Lipid                             | Long Chain Saturated Fatty Acid                              | 0.717017725 | -0.479919312 | 0.077507024 | 0.264246832 |
| M282  | picolinate                                                   | Amino Acid                        | Tryptophan Metabolism                                        | 0.646076195 | -0.630223776 | 0.077018538 | 0.264246832 |
| M10   | serine                                                       | Amino Acid                        | Glycine, Serine and Threonine Metabolism                     | 0.644076585 | -0.642130531 | 0.078705966 | 0.264954119 |
| M2841 | glycerol                                                     | Lipid                             | Glycerolipid Metabolism                                      | 0.826605188 | -0.274729677 | 0.0791678   | 0.266966865 |
| M2924 | oleoyl-oleoyl-glycerol (18:1/18:1) [2]*                      | Lipid                             | Diacylglycerol                                               | 0.580040809 | -0.78577369  | 0.079297089 | 0.266966865 |
| M1447 | succinyl carnitine (C4-DC)                                   | Energy                            | TCA Cycle                                                    | 0.559503159 | -0.837781818 | 0.08078033  | 0.270956901 |
| M2358 | 1-oleoyl-2-docosahexaenoyl-GPC (18:1/22:6)*                  | Lipid                             | Phosphatidylcholine (PC)                                     | 0.781662337 | -0.355382569 | 0.081905311 | 0.27105491  |
| M405  | 3-hydroxy-2-ethylpropionate                                  | Amino Acid                        | Leucine, Isoleucine and Valine Metabolism                    | 0.540397557 | -0.887906491 | 0.082314948 | 0.27105491  |
| M1921 | 3-hydroxyhexanoylcarnitine (1)                               | Lipid                             | Fatty Acid Metabolism (Acyl Carnitine, Hydroxy)              | 0.643511837 | -0.635961408 | 0.082389431 | 0.27105491  |
| M2002 | 9-hydroxystearate                                            | Lipid                             | Fatty Acid, Monohydroxy                                      | 0.469607526 | -1.090472564 | 0.081938074 | 0.27105491  |
| M2934 | linoleoyl-linolenoyl-glycerol (18:2/18:3) [2]*               | Lipid                             | Diacylglycerol                                               | 0.787160781 | -0.345269753 | 0.081967229 | 0.27105491  |
| M3031 | N-palmitoyl-sphingadineine (d18:2/16:0)*                     | Lipid                             | Ceramides                                                    | 0.804842921 | -0.313220851 | 0.082784493 | 0.27105491  |
| M416  | valine                                                       | Amino Acid                        | Leucine, Isoleucine and Valine Metabolism                    | 0.819302072 | -0.288011319 | 0.082896881 | 0.27105491  |
| M274  | N-formylanthranilic acid                                     | Amino Acid                        | Tryptophan Metabolism                                        | 0.473015254 | -1.080041387 | 0.084876793 | 0.276534066 |
| M6260 | 3-bromo-5-chloro-2,6-di-hydroxybenzoic acid*                 | Xenobiotics                       | Chemical                                                     | 0.738836723 | -0.43667252  | 0.087738069 | 0.284835374 |
| M3064 | glycosyl-N-(2-hydroxyneronyl)-sphingosine (d18:1/24:1[2OH])* | Lipid                             | Hexosylceramides (HCER)                                      | 0.376813429 | -1.408077715 | 0.088852881 | 0.287428004 |
| M391  | 1-carboxethylisoleucine                                      | Amino Acid                        | Leucine, Isoleucine and Valine Metabolism                    | 0.553658655 | -0.852931904 | 0.089299671 | 0.287848938 |
| M461  | cysteine s-sulfate                                           | Amino Acid                        | Methionine, Cysteine, SAM and Taurine Metabolism             | 0.831021712 | -0.267041925 | 0.08966631  | 0.288009456 |
| M1514 | stearate (18:0)                                              | Lipid                             | Long Chain Saturated Fatty Acid                              | 0.817160387 | -0.291308826 | 0.090043017 | 0.288201066 |
| M492  | citrulline                                                   | Amino Acid                        | Urea cycle; Arginine and Proline Metabolism                  | 0.74955606  | -0.415891713 | 0.091044433 | 0.290383824 |
| M2731 | 1-arachidonoyl-GPI* (20:4)*                                  | Lipid                             | Lysophospholipid                                             | 0.785631198 | -0.348075874 | 0.091731069 | 0.290452107 |
| M2851 | 1-palmitoylglycerol (16:0)                                   | Lipid                             | Monooacylglycerol                                            | 0.559889593 | -0.836785731 | 0.091978429 | 0.290452107 |
| M1886 | oleoylcarnitine (C18:1)                                      | Lipid                             | Fatty Acid Metabolism (Acyl Carnitine, Monounsaturated)      | 0.492035992 | -1.023164242 | 0.09202443  | 0.290452107 |
| M336  | N-acetyl leucine                                             | Amino Acid                        | Leucine, Isoleucine and Valine Metabolism                    | 0.616632883 | -0.697516269 | 0.092750293 | 0.291730159 |
| M5374 | 4-acetamidophenol                                            | Xenobiotics                       | Drug - Analgesics, Anesthetics                               | 0.163436328 | -2.613199403 | 0.09415627  | 0.295131205 |
| M92   | 1-methyl-5-imidazoleacetate                                  | Amino Acid                        | Histidine Metabolism                                         | 1.445236321 | 0.53136531   | 0.096504687 | 0.299395087 |
| M399  | 2-methylbutyrylglycine (C5)                                  | Amino Acid                        | Leucine, Isoleucine and Valine Metabolism                    | 0.507105098 | -0.979631937 | 0.096266631 | 0.299395087 |
| M4544 | methyl-4-hydroxybenzoate sulfate                             | Xenobiotics                       | Benzoate Metabolism                                          | 0.811580035 | -2.46132251  | 0.096079308 | 0.299395087 |
| M4239 | beta-alanine                                                 | Energy                            | Pyrimidine Metabolism, Uracil containing                     | 0.788935367 | -0.342020982 | 0.09694506  | 0.299736585 |
| M1460 | 2-methylcitrate/homocitrate                                  | Nucleotide                        | TCA Cycle                                                    | 0.847369213 | -0.238937382 | 0.097808204 | 0.300363708 |
| M2939 | oleoyl-arachidonoyl-glycerol (18:1/20:4) [1]*                | Lipid                             | Diacylglycerol                                               | 0.626453171 | -0.674721426 | 0.097734573 | 0.300363708 |
| M3378 | Salpha-androstan-3alpha,17beta-diol monosulfate (1)          | Lipid                             | Androgenic Steroids                                          | 0.524696105 | -0.930446015 | 0.099201993 | 0.302599367 |
| M1507 | myristate (14:0)                                             | Lipid                             | Long Chain Saturated Fatty Acid                              | 0.680591847 | -0.555138226 | 0.099016785 | 0.302599367 |
| M1894 | arachidonoylcarnitine (C20:4)                                | Lipid                             | Fatty Acid Metabolism (Acyl Carnitine, Polyunsaturated)      | 0.397224872 | -1.331972135 | 0.099574806 | 0.302720731 |
| M2197 | N-stearoylserine*                                            | Lipid                             | Endocannabinoid                                              | 0.451302947 | -1.147831898 | 0.101219758 | 0.305676943 |
| M458  | 5-methylcysteine sulfoxide                                   | Amino Acid                        | Methionine, Cysteine, SAM and Taurine Metabolism             | 0.641980954 | -0.639397599 | 0.101074732 | 0.305676943 |
| M2671 | 1-oleoyl-GPE (18:1)                                          | Lipid                             | Diacylglycerol                                               | 0.548404344 | -0.866688097 | 0.102365425 | 0.306540564 |
| M2601 | 2-palmitoyl-GPC* (16:0)*                                     | Lipid                             | Lysophospholipid                                             | 0.549872937 | -0.862829812 | 0.102340917 | 0.306540564 |
| M162  | tyrosine                                                     | Amino Acid                        | Tyrosine Metabolism                                          | 0.685698042 | -0.544354693 | 0.102517416 | 0.306540564 |
| M2923 | oleoyl-oleoyl-glycerol (18:1/18:1) [1]*                      | Lipid                             | Diacylglycerol                                               | 0.651830589 | -0.617431039 | 0.103872011 | 0.308560974 |
| M4131 | urate                                                        | Nucleotide                        | Purine Metabolism, (Hypo)Xanthine/Inosine containing         | 0.683486574 | -0.549015096 | 0.103603678 | 0.308560974 |
| M5214 | 3-indoleglyoxylic acid                                       | Xenobiotics                       | Food Component/Plant                                         | 0.759155193 | -0.397533251 | 0.107351494 | 0.317858332 |
| M4304 | nicotinamide                                                 | Cofactors and Vitamins            | Nicotinate and Nicotinamide Metabolism                       | 0.556078566 | -0.846693966 | 0.107794591 | 0.31807978  |
| M1944 | oleoylcholine                                                | Lipid                             | Fatty Acid Metabolism (Acyl Choline)                         | 0.513438053 | -0.961737872 | 0.108476053 | 0.31807978  |
| M1468 | phosphate                                                    | Energy                            | Oxidative Phosphorylation                                    | 0.681375389 | -0.553478257 | 0.108293098 | 0.31807978  |
| M4244 | 3-(3-amino-3-carboxypropyl)uridine*                          | Nucleotide                        | Pyrimidine Metabolism, Uracil containing                     | 0.61068718  | -0.711494534 | 0.109030496 | 0.318677559 |
| M2713 | 1-oleoyl-GPG (18:1)*                                         | Lipid                             | Lysophospholipid                                             | 0.371909358 | -1.426977047 | 0.109397923 | 0.318726664 |
| M505  | N-acetylproline                                              | Amino Acid                        | Urea cycle; Arginine and Proline Metabolism                  | 0.68550406  | -0.544762885 | 0.110626215 | 0.321275494 |
| M264  | tryptophan betaine                                           | Amino Acid                        | Tryptophan Metabolism                                        | 0.500244931 | -0.999293451 | 0.112214168 | 0.321983339 |
| M1531 | 10-heptadecenoate (17:1n7)                                   | Lipid                             | Long Chain Monounsaturated Fatty Acid                        | 0.604388348 | -0.726452248 | 0.112022952 | 0.322243238 |
| M3502 | tauroithocholate 3-sulfate                                   | Lipid                             | Secondary Bile Acid Metabolism                               | 0.330668214 | -1.596453724 | 0.11173941  | 0.322243238 |
| M1958 | alpha-hydroxycaproate                                        | Lipid                             | Fatty Acid, Monohydroxy                                      | 1.288100954 | 0.365245668  | 0.112948379 | 0.322861876 |
| M70   | histidine                                                    | Amino Acid                        | Histidine Metabolism                                         | 0.691383808 | -0.532441278 | 0.112643823 | 0.322861876 |
| M36   | aspartate                                                    | Amino Acid                        | Alanine and Aspartate Metabolism                             | 0.674992425 | -0.567056784 | 0.116533686 | 0.33043234  |
| M634  | gamma-glutamylglutamate                                      | Peptide                           | Gamma-glutamyl Amino Acid                                    | 0.655258364 | -0.609864232 | 0.116687328 | 0.33043234  |
| M37   | N-acetyl aspartate (NAA)                                     | Amino Acid                        | Alanine and Aspartate Metabolism                             | 0.700152025 | -0.514259884 | 0.116087736 | 0.33043234  |
| M5380 | 2-methoxyacetaminophen sulfate*                              | Xenobiotics                       | Drug - Analgesics, Anesthetics                               | 0.306552148 | -1.70579558  | 0.117889944 | 0.332801115 |
| M1989 | 3-hydroxystearate                                            | Lipid                             | Fatty Acid, Monohydroxy                                      | 0.565058874 | -0.823527247 | 0.11946254  | 0.334274602 |
| M3106 | behenoyl sphingomyelin (d18:1/22:0)*                         | Lipid                             | Sphingomyelins                                               | 1.170333026 | 0.226919117  | 0.119176188 | 0.334274602 |
| M278  | xanthurenate                                                 | Amino Acid                        | Tryptophan Metabolism                                        | 0.519349743 | -0.945221682 | 0.119515122 | 0.334274602 |
| M3052 | ceramide (d18:2/24:1, d18:1/24:2)*                           | Lipid                             | Ceramides                                                    | 0.714522037 | -0.484949587 | 0.121500156 | 0.338784176 |
| M5382 | 3-(cystein-5-yl)acetaminophen*                               | Xenobiotics                       | Drug - Analgesics, Anesthetics                               | 0.283858996 | -1.816753633 | 0.122272333 | 0.33989465  |
| M114  | N6-methyllysine                                              | Amino Acid                        | Lysine Metabolism                                            | 0.556974812 | -0.844316009 | 0.123367801 | 0.341894301 |
| M6428 | carnitine of C10H14O2 (5)*                                   | Partially Characterized Molecules | Partially Characterized Molecules                            | 0.787843588 | -0.344018857 | 0.126388546 | 0.348142996 |
| M1186 | phenylacetylglutamate                                        | Peptide                           | Acetylated Peptides                                          | 0.594610668 | -0.749982747 | 0.126250758 | 0.348142996 |
| M563  | 4-guainidinobutanoate                                        | Amino Acid                        | Guandinio and Acetamido Metabolism                           | 0.53239261  | -0.909437548 | 0.127298192 | 0.349589296 |
| M120  | 5-(galactosylhydroxy)-L-lysine                               | Amino Acid                        | Lysine Metabolism                                            | 1.241428341 | 0.312000987  | 0.127762139 | 0.349806581 |
| M2303 | 1-palmitoyl-2-docosahexaenoyl-GPC (16:0/22:6)                | Lipid                             | Phosphatidylcholine (PC)                                     | 0.776583741 | -0.364786592 | 0.130049948 | 0.354049942 |
| M522  | argininate*                                                  | Amino Acid                        | Urea cycle; Arginine and Proline Metabolism                  | 0.594822683 | -0.749468432 | 0.130442902 | 0.354049942 |
| M353  | glycocholate sulfate*                                        | Lipid                             | Secondary Bile Acid Metabolism                               | 1.305614666 | 0.384729169  | 0.130613125 | 0.354049942 |
| M1915 | suberoylcarnitine (C8-DC)                                    | Lipid                             | Fatty Acid Metabolism (Acyl Carnitine, Dicarboxylate)        | 0.440774934 | -1.181885912 | 0.131096823 | 0.354663728 |
| M1526 | myristoleate (14:1n5)                                        | Lipid</                           |                                                              |             |              |             |             |

|       |                                                         |                                   |                                                         |             |              |             |             |
|-------|---------------------------------------------------------|-----------------------------------|---------------------------------------------------------|-------------|--------------|-------------|-------------|
| M5210 | (5)- $\alpha$ -amino- $\omega$ -caprolactam             | Xenobiotics                       | Food Component/Plant                                    | 0.816460862 | -0.292544365 | 0.147089358 | 0.385314773 |
| M1920 | (5)-3-hydroxybutylcarnitine                             | Lipid                             | Fatty Acid Metabolism (Acyl Carnitine, Hydroxy)         | 0.639802925 | -0.644300506 | 0.14895323  | 0.389107698 |
| M4153 | 1-methyladenosine                                       | Nucleotide                        | Purine Metabolism, Adenine containing                   | 0.778989926 | -0.360323424 | 0.149948659 | 0.390553956 |
| M1844 | hexanoylcarnitine (C6)                                  | Lipid                             | Fatty Acid Metabolism (Acyl Carnitine, Medium Chain)    | 0.732642945 | -0.448817826 | 0.150840171 | 0.391177766 |
| M1448 | succinate                                               | Energy                            | TCA Cycle                                               | 0.680205582 | -0.555957249 | 0.15104884  | 0.391177766 |
| M1891 | linoleoylcarnitine (C18:2)*                             | Lipid                             | Fatty Acid Metabolism (Acyl Carnitine, Polyunsaturated) | 0.535824344 | -0.900167967 | 0.153034228 | 0.395193505 |
| M2613 | 1-oleoyl-GPC (18:1)                                     | Lipid                             | Lysophospholipid                                        | 0.635273137 | -0.654551081 | 0.15436199  | 0.39525366  |
| M1576 | docosapentaenoate (n6 DPA; 22:5n6)                      | Lipid                             | Long Chain Polyunsaturated Fatty Acid (n3 and n6)       | 0.640641675 | -0.642410443 | 0.15400242  | 0.39525366  |
| M1674 | heptenedioate (C7-1-DC)*                                | Lipid                             | Fatty Acid, Dicarboxylate                               | 0.570251729 | -0.810329178 | 0.153522229 | 0.39525366  |
| M643  | gamma-glutamylphenylalanine                             | Peptide                           | Gamma-glutamyl Amino Acid                               | 0.842888846 | -0.246587053 | 0.155700457 | 0.396625109 |
| M43   | hydroxyasparagine                                       | Amino Acid                        | Alanine and Aspartate Metabolism                        | 1.186169063 | 0.24630965   | 0.155770257 | 0.396625109 |
| M2611 | 1-stearoyl-GPC (18:0)                                   | Lipid                             | Lysophospholipid                                        | 0.663404236 | -0.59203987  | 0.157198351 | 0.398031479 |
| M35   | N-carbamoylalanine                                      | Amino Acid                        | Alanine and Aspartate Metabolism                        | 0.481873879 | -1.053272497 | 0.156793168 | 0.398031479 |
| M4325 | N1-Methyl-4-pyridone-3-carboxamide                      | Cofactors and Vitamins            | Nicotinate and Nicotinamide Metabolism                  | 0.499124845 | -1.002527377 | 0.159313615 | 0.402266878 |
| M429  | 2,3-dihydroxy-2-methylbutyrate                          | Amino Acid                        | Leucine, Isoleucine and Valine Metabolism               | 0.502632768 | -0.992423368 | 0.160235557 | 0.403474019 |
| M2236 | glycerophosphorylcholine (GPC)                          | Lipid                             | Phospholipid Metabolism                                 | 0.616636758 | -0.697507202 | 0.160814422 | 0.403813009 |
| M3477 | glycocholate sulfate                                    | Lipid                             | Primary Bile Acid Metabolism                            | 0.881289944 | -0.182311352 | 0.161995282 | 0.405657607 |
| M2673 | 1-linoleoyl-GPE (18:2)*                                 | Lipid                             | Lysophospholipid                                        | 0.585658058 | -0.771869514 | 0.164701605 | 0.408095048 |
| M2416 | 1-palmitoyl-2-arachidonoyl-GPE (16:0/20:4)*             | Lipid                             | Phosphatidylethanolamine (PE)                           | 0.669606162 | -0.57861529  | 0.164597641 | 0.408095048 |
| M4133 | allantoin                                               | Nucleotide                        | Purine Metabolism, (Hypo)Xanthine/Inosine containing    | 0.681551612 | -0.553105182 | 0.164764447 | 0.408095048 |
| M5505 | metronidazole                                           | Xenobiotics                       | Drug - Antibiotic                                       | 1.00011955  | 1.72E-05     | 0.164244682 | 0.408095048 |
| M424  | 5-methyluridine (ribothymidine)                         | Nucleotide                        | Pyrimidine Metabolism, Uracil containing                | 0.799607661 | -0.322635801 | 0.166200375 | 0.410532992 |
| M2600 | 1-palmitoyl-GPC (16:0)                                  | Lipid                             | Lysophospholipid                                        | 0.685350179 | -0.545086774 | 0.167000461 | 0.41139138  |
| M2447 | 1-oleoyl-2-arachidonoyl-GPE (18:1/20:4)*                | Lipid                             | Phosphatidylethanolamine (PE)                           | 0.688663293 | -0.538129314 | 0.168802016 | 0.414705494 |
| M1837 | picolinoylglycine                                       | Lipid                             | Fatty Acid Metabolism (Acyl Glycine)                    | 0.83996384  | -0.251600873 | 0.169700371 | 0.415788781 |
| M3025 | N-stearoyl-sphingosine (d18:1/18:0)*                    | Lipid                             | Ceramides                                               | 0.86489995  | -0.209394841 | 0.170946885 | 0.417716985 |
| M2297 | 1-palmitoyl-2-arachidonoyl-GPC (16:0/20:4n6)            | Lipid                             | Phosphatidylcholine (PC)                                | 0.861246388 | -0.215502067 | 0.171475424 | 0.417885149 |
| M2818 | 1-(1-enyl-stearoyl)-2-arachidonoyl-GPE (P-18:0/20:4)*   | Lipid                             | Plasmalogen                                             | 0.762025605 | -0.392088621 | 0.172264538 | 0.418301882 |
| M6259 | 3,5-dichloro-2,6-dihydroxybenzoic acid                  | Xenobiotics                       | Chemical                                                | 0.749808761 | -0.415405411 | 0.173026961 | 0.418301882 |
| M6213 | 4-hydroxychlorothalonil                                 | Xenobiotics                       | Chemical                                                | 0.665035427 | -0.588496899 | 0.172607227 | 0.418301882 |
| M1529 | palmitoleate (16:1n7)                                   | Lipid                             | Long Chain Monounsaturated Fatty Acid                   | 0.572160655 | -0.805507803 | 0.174613898 | 0.421018657 |
| M2033 | 25,3R-dihydroxybutyrate                                 | Lipid                             | Fatty Acid, Dihydroxy                                   | 0.529851202 | -0.91634083  | 0.176368905 | 0.424125224 |
| M2868 | 2-palmitoyl-glycerol (16:0)                             | Lipid                             | Monooacylglycerol                                       | 0.499040529 | -1.002771108 | 0.178162058 | 0.427306887 |
| M1952 | arachidonoylcholine                                     | Lipid                             | Fatty Acid Metabolism (Acyl Choline)                    | 0.541385972 | -0.885270588 | 0.181131015 | 0.433284454 |
| M1707 | 3-carboxy-4-methyl-5-pentyl-2-furanpropionate (3-CMPPF) | Lipid                             | Fatty Acid, Dicarboxylate                               | 1.407932317 | 0.493577982  | 0.181652771 | 0.433920044 |
| M1823 | N-palmitoylglycine                                      | Xenobiotics                       | Fatty Acid Metabolism (Acyl Glycine)                    | 0.715204013 | -0.483573263 | 0.182480246 | 0.43426554  |
| M507  | thymol sulfate                                          | Xenobiotics                       | Food Component/Plant                                    | 0.178243331 | -2.488079999 | 0.182986792 | 0.434295024 |
| M579  | 5-oxoproline                                            | Amino Acid                        | Glutathione Metabolism                                  | 0.718204899 | -0.4775326   | 0.184079821 | 0.43575145  |
| M5376 | 3-(N-acetyl-L-cystein-5-yl) acetaminophen               | Xenobiotics                       | Drug - Analgesics, Anesthetics                          | 0.38052126  | -1.393951036 | 0.185832566 | 0.438757929 |
| M1750 | 2-aminheptanoate                                        | Lipid                             | Fatty Acid, Amino                                       | 0.733334155 | -0.982099853 | 0.187302045 | 0.441081759 |
| M1540 | 10-nonadecenoate (19:1n9)                               | Lipid                             | Long Chain Monounsaturated Fatty Acid                   | 0.645765229 | -0.630918333 | 0.189422762 | 0.444023231 |
| M1495 | cis-4-decenoate (10:1n6)*                               | Lipid                             | Medium Chain Fatty Acid                                 | 0.552908116 | -0.854888346 | 0.190287069 | 0.445801406 |
| M2801 | 1-(1-enyl-palmitoyl)-2-linoleoyl-GPE (P-16:0/18:2)*     | Lipid                             | Plasmalogen                                             | 0.851692843 | -0.231594869 | 0.192212773 | 0.448870252 |
| M2872 | 2-linoleoylglycerol (18:2)                              | Lipid                             | Monooacylglycerol                                       | 0.557767837 | -0.842263349 | 0.192584597 | 0.448870252 |
| M2873 | 2-arachidonoylglycerol (20:4)                           | Lipid                             | Monooacylglycerol                                       | 0.687475967 | -0.540618815 | 0.193526146 | 0.449636335 |
| M632  | gamma-glutamylalanine                                   | Peptide                           | Gamma-glutamyl Amino Acid                               | 0.597696537 | -0.742514911 | 0.193902578 | 0.449636335 |
| M1346 | fructose                                                | Carbohydrate                      | Fructose, Mannose and Galactose Metabolism              | 1.565920793 | 0.64701124   | 0.196201072 | 0.453808587 |
| M3326 | cortolone glucuronide (1)                               | Lipid                             | Corticosteroids                                         | 2.215095783 | 1.147369084  | 0.196839795 | 0.454130389 |
| M3206 | 7-HOCA                                                  | Lipid                             | Sterol                                                  | 0.74988077  | -0.415266867 | 0.198106687 | 0.454744894 |
| M2926 | oleoyl-linoleoyl-glycerol (18:1/18:2) [1]               | Lipid                             | Diacylglycerol                                          | 0.676189565 | -0.564500342 | 0.197624347 | 0.454744894 |
| M1918 | octadecenediylcarnitine (C18:1-DC)*                     | Lipid                             | Fatty Acid Metabolism (Acyl Carnitine, Dicarboxylate)   | 0.597889871 | -0.742048325 | 0.205206345 | 0.458955333 |
| M1430 | N-acetylglucosaminylasparagine                          | Carbohydrate                      | Aminosugar Metabolism                                   | 1.319474255 | 0.399963201  | 0.205733057 | 0.469877762 |
| M1968 | 2-hydroxypalmitate                                      | Lipid                             | Fatty Acid, Monohydroxy                                 | 0.830532503 | -0.267891465 | 0.213422245 | 0.480695715 |
| M1519 | behenate (22:0)*                                        | Lipid                             | Long Chain Saturated Fatty Acid                         | 0.498902054 | -1.003171486 | 0.214442844 | 0.480695715 |
| M261  | C-glycosyltryptophan                                    | Amino Acid                        | Tryptophan Metabolism                                   | 0.868168581 | -0.203952883 | 0.213579769 | 0.480695715 |
| M1577 | docosadienoate (22:2n6)                                 | Lipid                             | Long Chain Polyunsaturated Fatty Acid (n3 and n6)       | 0.707301973 | -0.499601808 | 0.212714145 | 0.480695715 |
| M1158 | Fibrinopeptide A (2-15)                                 | Peptide                           | Fibrinogen Cleavage Peptide                             | 0.613601463 | -0.704626173 | 0.214700176 | 0.480695715 |
| M6399 | glutamine conjugate of C6H10O2 (1)*                     | Partially Characterized Molecules | Partially Characterized Molecules                       | 0.567466471 | -0.817392941 | 0.211221598 | 0.480695715 |
| M4357 | gulonate*                                               | Cofactors and Vitamins            | Ascorbate and Aldarate Metabolism                       | 1.348706173 | 0.43157608   | 0.214239421 | 0.480695715 |
| M3021 | N-palmitoyl-sphingosine (d18:1/16:0)                    | Lipid                             | Ceramides                                               | 0.84162679  | -0.248747467 | 0.213538494 | 0.480695715 |
| M3033 | N-behenoyl-sphingadiene (d18:2/22:0)*                   | Lipid                             | Ceramides                                               | 0.868921945 | -0.202701509 | 0.216701248 | 0.483983869 |
| M2603 | 2-palmitoleoyl-GPC* (16:1)*                             | Lipid                             | Lysophospholipid                                        | 0.638200454 | -0.64791846  | 0.218748265 | 0.486166682 |
| M245  | thyroxine                                               | Amino Acid                        | Tyrosine Metabolism                                     | 0.818851057 | -0.288327035 | 0.218449651 | 0.486166682 |
| M2635 | 1-arachidonoyl-GPC* (20:4)*                             | Lipid                             | Lysophospholipid                                        | 0.609356941 | -0.714646055 | 0.219725741 | 0.487374492 |
| M2539 | 2-arachidonoyl-GPI (16:0/20:4)*                         | Lipid                             | Phosphatidylinositol (PI)                               | 0.883113673 | -0.179328943 | 0.221651756 | 0.487374492 |
| M332  | leucine                                                 | Amino Acid                        | Leucine, Isoleucine and Valine Metabolism               | 0.811069928 | -0.30201179  | 0.220804498 | 0.487374492 |
| M4174 | N6-succinyladenosine                                    | Nucleotide                        | Purine Metabolism, Adenine containing                   | 0.638040726 | -0.64827958  | 0.221159536 | 0.487374492 |
| M5017 | sulfate of piperine metabolite C16H19NO3 (2)*           | Xenobiotics                       | Food Component/Plant                                    | 0.700408914 | -0.513730649 | 0.22181364  | 0.487374492 |
| M1449 | fumarate                                                | Energy                            | TCA Cycle                                               | 0.819418287 | -0.287328005 | 0.224020046 | 0.489629267 |
| M2159 | oleoyl ethanolamide                                     | Lipid                             | Endocannabinoid                                         | 0.690166049 | -0.534984589 | 0.22407676  | 0.489629267 |
| M2616 | 1-linoleoyl-GPC (18:2)                                  | Lipid                             | Lysophospholipid                                        | 0.621105823 | -0.687080092 | 0.225449302 | 0.49027133  |
| M3262 | pregnenetriol disulfate*                                | Lipid                             | Pregnenolone Steroids                                   | 2.409109811 | 1.268500155  | 0.225384277 | 0.49027133  |
| M645  | gamma-glutamyltryptophan                                | Peptide                           | Gamma-glutamyl Amino Acid                               | 0.682149518 | -0.551840012 | 0.227139    | 0.491593693 |
| M150  | phenylpyruvate                                          | Amino Acid                        | Phenylalanine Metabolism                                | 0.81048577  | -0.303141239 | 0.226923231 | 0.491593693 |
| M1504 | 5-dodecenoate (12:1n7)                                  | Lipid                             | Medium Chain Fatty Acid                                 | 0.518222261 | -0.948357106 | 0.229569692 | 0.492167099 |
| M639  | gamma-glutamylleucine                                   | Peptide                           | Gamma-glutamyl Amino Acid                               | 0.816822377 | -0.291905705 | 0.229216688 | 0.492167099 |
| M73   | N-acetylhistidine                                       | Amino Acid                        | Histidine Metabolism                                    | 0.575120645 | -0.798063467 | 0.228912542 | 0.492167099 |
| M1943 | palmitoylcholine                                        | Lipid                             | Fatty Acid Metabolism (Acyl Choline)                    | 0.577427131 | -0.792289198 | 0.228260017 | 0.492167099 |
| M2725 | 1-linoleoyl-GPI* (18:2)*                                | Lipid                             | Lysophospholipid                                        | 0.860607359 | -0.214778442 | 0.233424114 | 0.498081032 |
| M2410 | 1-palmitoyl-2-linoleoyl-GPE (16:0/18:2)                 | Lipid                             | Phosphatidylethanolamine (PE)                           | 0.735542057 | -0.443120261 | 0.23319285  | 0.498081032 |
| M263  | oxindolylalanine                                        | Amino Acid                        | Tryptophan Metabolism                                   | 1.607338887 | 0.684674135  | 0.237647903 | 0.505906191 |
| M1500 | 10-undecenoate (11:1n1)                                 | Lipid                             | Medium Chain Fatty Acid                                 | 0.521734273 | -0.938612888 | 0.238218378 | 0.505935762 |
| M1699 | octadecenedioate (C18:1-DC)                             | Lipid                             | Fatty Acid, Dicarboxylate                               | 0.68637061  | -0.542940316 | 0.239312044 | 0.507073771 |
| M6401 | glutamine conjugate of C7H12O2*                         | Partially Characterized Molecules | Partially Characterized Molecules                       | 0.558405733 | -0.840614341 | 0.240527039 | 0.508462973 |
| M2602 | 1-palmitoleoyl-GPC* (16:1)*                             | Lipid                             | Lysophospholipid                                        | 0.655944596 | -0.608354131 | 0.245268867 | 0.515150196 |
| M223  | dopamine 4-sulfate                                      | Amino Acid                        | Tyrosine Metabolism                                     | 0.578707043 | -0.789094892 | 0.248790909 | 0.515150196 |
| M4895 | erythritol                                              | Xenobiotics                       | Food Component/Plant                                    | 1.252124302 | 0.32437779   | 0.248402528 | 0.515150196 |
| M1433 | N-acetylglucosamine/N-acetylgalactosamine               | Carbohydrate                      | Aminosugar Metabolism                                   | 0.897439342 | -0.156113665 | 0.247807571 | 0.515150196 |
| M1510 | palmitoyl ethanolamide                                  | Lipid                             | Long Chain Saturated Fatty Acid                         | 0.831907998 | -0.265504125 | 0.247956578 | 0.515150196 |
| M2162 | phosphorylcholine (18:2/24:1, d18:1/24:2)*              | Lipid                             | Endocannabinoid                                         | 0.740651139 | -0.43313393  | 0.247138864 | 0.515150196 |
| M3130 | phosphorylcholine (d18:2/24:1, d18:1/24:2)*             | Lipid                             | Sphingomyelin                                           | 0.856554791 | -0.223382562 | 0.247395577 | 0.515150196 |
| M3541 | taurochenodeoxycholic acid 3-sulfate                    | Lipid                             | Secondary Bile Acid Metabolism                          | 1.62576847  | 0.701121814  | 0.244905313 | 0.515150196 |
| M3311 | tetrahydrocortisol sulfate (1)                          | Lipid                             | Corticosteroids                                         | 3.715443482 | 1.893534424  | 0.248761151 | 0.515150196 |
| M3525 | hyocholate                                              | Lipid                             | Secondary Bile Acid Metabolism                          | 1.574111673 | 0.654537895  | 0.250045602 | 0.516571482 |
| M1557 | stearidonate (18:4n3)                                   | Lipid                             | Long Chain Polyunsaturated Fatty Acid (n3 and n6)       | 0.710589086 | -0.492912564 | 0.252476825 | 0.520411414 |
| M4147 | adenine                                                 | Nucleotide                        | Purine Metabolism, Adenine containing                   | 0.873244128 | -0.195543059 | 0.256162572 | 0.526813977 |
| M327  | 6-bromotryptophan                                       | Amino Acid                        | Tryptophan Metabolism                                   | 0.56159495  | -0.83298132  | 0.259554211 | 0.532584149 |
| M1948 | linoleoylcholine*                                       | Lipid                             | Fatty Acid Metabolism (Acyl Choline)                    | 0.619352784 | -0.691166691 | 0.260801297 | 0.532928105 |
| M3243 | pregnenolone sulfate                                    | Lipid                             | Pregnenolone Steroids                                   | 1.840125196 | 0.789803926  | 0.260894397 | 0.532928105 |
| M6266 | 4-chlorobenzoic acid                                    | Xenobiotics                       | Chemical                                                | 0.943368599 | -0.084106515 | 0.263520718 | 0.5357141   |
| M4186 | 7-methylguanine                                         | Nucleotide                        | Purine Metabolism, Guanine containing                   | 0.691464956 | -0.532271959 | 0.263947305 | 0.5357141   |
| M4251 | cytidine                                                | Nucleotide                        | Pyrimidine Metabolism, Cytidine containing              | 1.543430195 | 0.626140236  | 0.264026311 | 0.5357141   |
| M3474 | glycochenodeoxycholate 3-sulfate                        | Lipid                             | Primary Bile Acid Metabolism                            | 2.406066674 | 1.266676621  | 0.266094248 | 0.538707509 |
| M2927 | oleoyl-linoleoyl-glycerol (18:1/18:2) [2]               | Lipid                             | Diacylglycerol                                          | 0.696472574 | -0.521861552 | 0.267309581 | 0.53996533  |
| M1575 | adrenate (22:4n6)                                       | Lipid                             | Long Chain Polyunsaturated Fatty Acid (n3 and n6)       | 0.642687071 | -0.637811646 | 0.268983112 | 0.540205162 |
| M1560 | eicosapentaenoate (EPA; 20:5n3)                         | Lipid                             | Long Chain Polyunsaturated Fatty Acid (n3 and n6)       | 0.790869939 | -0.338487636 | 0.268556068 | 0.540205162 |
| M1774 | methylmalonate (MMA)                                    | Lipid                             | Fatty Acid Metabolism (also BCAA Metabolism)            | 0.795054747 | -0.330873888 | 0.269211153 | 0.540205162 |
| M1990 | 3-hydroxyoleate*                                        | Lipid                             | Fatty Acid, Monohydroxy                                 | 0.527635873 | -0.922385441 | 0.270499565 |             |

|       |                                                                     |                                   |                                                              |              |              |             |             |
|-------|---------------------------------------------------------------------|-----------------------------------|--------------------------------------------------------------|--------------|--------------|-------------|-------------|
| M1885 | palmitoleoylcarnitine (C16:1)*                                      | Lipid                             | Fatty Acid Metabolism (Acyl Carnitine, Monounsaturated)      | 0.611181158  | -0.710328028 | 0.29359108  | 0.573923208 |
| M4451 | pyridoxate                                                          | Cofactors and Vitamins            | Vitamin B6 Metabolism                                        | 1.123926684  | 0.168547928  | 0.299763845 | 0.583480376 |
| M5009 | glucuronide of piperine metabolite C17H21NO3 (4)*                   | Xenobiotics                       | Food Component/Plant                                         | 0.646667272  | -0.628904498 | 0.299198205 | 0.583480376 |
| M4376 | delta-CEHC                                                          | Cofactors and Vitamins            | Tocopherol Metabolism                                        | 3.271377984  | 1.709898462  | 0.301857038 | 0.585049142 |
| M139  | N-acetyl-2-aminoadipate                                             | Amino Acid                        | Lysine Metabolism                                            | 0.739106069  | -0.436146675 | 0.301800688 | 0.585049142 |
| M5381 | 2-methoxyacetaminophen glucuronide*                                 | Xenobiotics                       | Drug - Analgesics, Anesthetics                               | 0.451944551  | -1.145782316 | 0.304737234 | 0.586877427 |
| M1907 | adipoylcarnitine (C6-DC)                                            | Lipid                             | Fatty Acid Metabolism (Acyl Carnitine, Dicarboxylate)        | 0.613590457  | -0.704652049 | 0.303468991 | 0.586877427 |
| M117  | hydroxy-N6,N6,N6-trimethyllysine*                                   | Amino Acid                        | Lysine Metabolism                                            | 0.706350928  | -0.501542975 | 0.304204636 | 0.586877427 |
| M4476 | benzoate                                                            | Xenobiotics                       | Benzoate Metabolism                                          | 0.618141571  | -0.693990804 | 0.307855779 | 0.591629817 |
| M4369 | gamma-CEHC glucuronide*                                             | Cofactors and Vitamins            | Tocopherol Metabolism                                        | 2.234100553  | 1.15969412   | 0.3128315   | 0.599039038 |
| M2911 | palmitoleyl-linoleoyl-glycerol (16:1/18:2) [1]*                     | Lipid                             | Diacylglycerol                                               | 0.626753824  | -0.674029201 | 0.313029201 | 0.599039038 |
| M2438 | 1-stearoyl-2-arachidonoyl-GPE (18:0/20:4)                           | Lipid                             | Phosphatidylethanolamine (PE)                                | 0.72725372   | -0.459469323 | 0.314960057 | 0.600206902 |
| M60   | 2-pyrrolidinone                                                     | Amino Acid                        | Glutamate Metabolism                                         | 0.80749752   | -0.308470266 | 0.314422435 | 0.600206902 |
| M2715 | 1-linoleoyl-GPG (18:2)*                                             | Lipid                             | Lysophospholipid                                             | 0.733537412  | -0.444705746 | 0.318548358 | 0.601528071 |
| M2286 | 1-palmitoyl-2-linoleoyl-GPC (16:0/18:2)                             | Lipid                             | Phosphatidylcholine (PC)                                     | 0.92953528   | -1.05418472  | 0.319623827 | 0.601528071 |
| M3175 | 3-hydroxy-3-methylglutarate                                         | Lipid                             | Nevalonate Metabolism                                        | 0.884640283  | -0.176837156 | 0.316416997 | 0.601528071 |
| M1406 | glucuronate                                                         | Carbohydrate                      | Aminousugar Metabolism                                       | 1.156747879  | 0.210074454  | 0.319288866 | 0.601528071 |
| M3108 | lignoceroyl sphingomyelin (d18:1/24:0)                              | Lipid                             | Sphingomyelins                                               | 0.944098347  | -0.082990941 | 0.317331748 | 0.601528071 |
| M3110 | sphingomyelin (d18:2/23:1)*                                         | Lipid                             | Sphingomyelins                                               | 0.863710427  | -0.211380388 | 0.318632938 | 0.601528071 |
| M6431 | branched-chain, straight-chain, or cyclopropyl 10:1 fatty acid (2)* | Partially Characterized Molecules | Partially Characterized Molecules                            | 0.694440943  | -0.526076087 | 0.322070556 | 0.603358168 |
| M3484 | deoxycholic acid glucuronide                                        | Lipid                             | Secondary Bile Acid Metabolism                               | 1.530334636  | 0.61384716   | 0.321508867 | 0.603358168 |
| M75   | N-acetyl-3-methylhistidine*                                         | Amino Acid                        | Histidine Metabolism                                         | 0.203907236  | 1.027913239  | 0.322587536 | 0.603358168 |
| M564  | guanidinossuccinate                                                 | Amino Acid                        | Guanidino and Acetamido Metabolism                           | 2.323176234  | 1.2160986    | 0.323543244 | 0.603903098 |
| M2418 | 1-palmitoyl-2-docosahexaenoyl-GPE (16:0/22:6)*                      | Lipid                             | Phosphatidylethanolamine (PE)                                | 0.671893931  | -0.573695751 | 0.327246327 | 0.606749568 |
| M156  | 2-hydroxyphenylacetate                                              | Amino Acid                        | Phenylalanine Metabolism                                     | 0.581604862  | -0.781888766 | 0.328615633 | 0.606749568 |
| M364  | beta-hydroxyisovaleryl carnitine                                    | Amino Acid                        | Leucine, Isoleucine and Valine Metabolism                    | 0.813967995  | -0.296956026 | 0.329073198 | 0.606749568 |
| M1179 | Fibrinopeptide B (1-12)                                             | Peptide                           | Fibrinogen Cleavage Peptide                                  | 0.735081273  | -0.444024327 | 0.327125421 | 0.606749568 |
| M86   | N-acetylcarnosine                                                   | Amino Acid                        | Histidine Metabolism                                         | 0.632791596  | -0.660197655 | 0.327753325 | 0.606749568 |
| M4450 | pyridoxal                                                           | Cofactors and Vitamins            | Vitamin B6 Metabolism                                        | 0.907807787  | -0.139541231 | 0.327386622 | 0.606749568 |
| M1159 | Fibrinopeptide A (3-15)                                             | Peptide                           | Fibrinogen Cleavage Peptide                                  | 0.673783885  | -0.56964217  | 0.323232771 | 0.609588171 |
| M648  | gamma-glutamylserine                                                | Peptide                           | Gamma-glutamyl Amino Acid                                    | 0.740494616  | -0.433438849 | 0.333214268 | 0.609588171 |
| M3116 | sphingomyelin (d17:2/16:0, d18:2/15:0)*                             | Lipid                             | Sphingomyelins                                               | 0.858292604  | -0.220458260 | 0.333295182 | 0.609588171 |
| M3117 | sphingomyelin (d18:2/16:0, d18:1/16:1)*                             | Lipid                             | Sphingomyelins                                               | 0.898283092  | -0.154757916 | 0.333102438 | 0.609588171 |
| M119  | 5-hydroxyllysine                                                    | Amino Acid                        | Lysine Metabolism                                            | 0.749627891  | -0.415753463 | 0.337023976 | 0.611393743 |
| M1243 | glycerate                                                           | Carbohydrate                      | Glycolysis, Gluconeogenesis, and Pyruvate Metabolism         | 0.829291783  | -0.270048927 | 0.336909682 | 0.611393743 |
| M5378 | 4-acetamidophenylglucuronide                                        | Xenobiotics                       | Drug - Analgesics, Anesthetics                               | 0.484264192  | -1.046133764 | 0.341390818 | 0.619449572 |
| M3271 | Salpha-pregnan-3beta,20beta-diol monosulfate (1)                    | Lipid                             | Progestin Steroids                                           | 1.866237659  | 0.59013272   | 0.342012795 | 0.619449572 |
| M6400 | glutamine conjugate of C6H10O2 (2)*                                 | Partially Characterized Molecules | Partially Characterized Molecules                            | 0.634338548  | -0.65667058  | 0.342094263 | 0.619449572 |
| M2534 | 1-palmitoyl-2-oleoyl-GPI (16:0/18:1)*                               | Lipid                             | Phosphatidylinositol (PI)                                    | 0.864775545  | -0.209602369 | 0.345648298 | 0.624534644 |
| M4451 | malate                                                              | Energy                            | TCA Cycle                                                    | 0.792130802  | 0.336118918  | 0.346227763 | 0.624534644 |
| M6423 | pentose acid*                                                       | Partially Characterized Molecules | Partially Characterized Molecules                            | 0.810234719  | -0.303588189 | 0.347906849 | 0.626232327 |
| M1862 | myristoylcarnitine (C14)                                            | Lipid                             | Fatty Acid Metabolism (Acyl Carnitine, Long Chain Saturated) | 0.639351595  | -0.64531045  | 0.348599397 | 0.626238838 |
| M133  | 6-oxopiperidine-2-carboxylate                                       | Amino Acid                        | Lysine Metabolism                                            | 0.719236921  | -0.475461014 | 0.349446212 | 0.626521922 |
| M2365 | 1-linoleoyl-2-arachidonoyl-GPC (18:2/20:4n6)*                       | Lipid                             | Phosphatidylcholine (PC)                                     | 0.831781806  | -0.265722967 | 0.351012675 | 0.627580267 |
| M6261 | diethyl sulfosuccinate                                              | Xenobiotics                       | Chemical                                                     | 1.650651046  | 0.723035161  | 0.351417333 | 0.627580267 |
| M1439 | citrate                                                             | Energy                            | TCA Cycle                                                    | 0.797499472  | -0.326444531 | 0.354886982 | 0.630063021 |
| M1572 | dihomolinenolate (20:3n3 or 3n6)                                    | Lipid                             | Long Chain Polyunsaturated Fatty Acid (n3 and n6)            | 0.784714119  | -0.349760936 | 0.353705888 | 0.630063021 |
| M3514 | glycoursodeoxycholate                                               | Lipid                             | Secondary Bile Acid Metabolism                               | 0.596632715  | -0.745085007 | 0.354509025 | 0.630063021 |
| M1947 | dihomo-linolenyl-choline                                            | Lipid                             | Fatty Acid Metabolism (Acyl Choline)                         | 0.581871861  | -0.781226616 | 0.357800658 | 0.633483144 |
| M3260 | pregnen-diol disulfate*                                             | Lipid                             | Pregnenolone Steroids                                        | 1.563774771  | 0.645032738  | 0.358207191 | 0.633483144 |
| M2404 | 1,2-dipalmitoyl-GPE (16:0/16:0)*                                    | Lipid                             | Phosphatidylethanolamine (PE)                                | 0.699292162  | -0.516032759 | 0.359994427 | 0.635373907 |
| M2810 | 1-(1-enyl-stearoyl)-2-linoleoyl-GPE (P-18:0/18:2)*                  | Lipid                             | Plasmalogens                                                 | 0.882163726  | -0.180881656 | 0.362072259 | 0.635373907 |
| M3500 | glycolithocholate sulfate*                                          | Lipid                             | Secondary Bile Acid Metabolism                               | 0.541080233  | -0.886085558 | 0.361679874 | 0.635373907 |
| M1881 | undecenoylcarnitine (C11:1)                                         | Lipid                             | Fatty Acid Metabolism (Acyl Carnitine, Monounsaturated)      | 0.75058138   | -0.413919593 | 0.360714442 | 0.635373907 |
| M1768 | butyrylcarnitine (C4)                                               | Lipid                             | Fatty Acid Metabolism (also BCAA Metabolism)                 | 0.803512249  | -0.315608077 | 0.364750844 | 0.636388709 |
| M4498 | catechol sulfate                                                    | Xenobiotics                       | Benzoate Metabolism                                          | 1.747716666  | 0.805471319  | 0.364043119 | 0.636388709 |
| M3389 | Salpha-androstan-3beta,17alpha-diol disulfate                       | Lipid                             | Androgenic Steroids                                          | 0.643505272  | -0.635971216 | 0.36417813  | 0.636388709 |
| M2198 | N-palmitylserine                                                    | Amino Acid                        | Endocannabinoid                                              | 0.585983946  | -0.771066956 | 0.365842705 | 0.637070918 |
| M529  | creatinine                                                          | Lipid                             | Creatine Metabolism                                          | 0.897909562  | -0.155357952 | 0.36849103  | 0.640455728 |
| M6430 | branched-chain, straight-chain, or cyclopropyl 10:1 fatty acid (1)* | Partially Characterized Molecules | Partially Characterized Molecules                            | 0.638112858  | -0.648116491 | 0.370146567 | 0.64210504  |
| M2408 | 1-palmitoyl-2-oleoyl-GPE (16:0/18:1)                                | Lipid                             | Phosphatidylethanolamine (PE)                                | 0.754970872  | -0.405507111 | 0.372237139 | 0.642534052 |
| M375  | 3-methylglutaryl carnitine (2)                                      | Amino Acid                        | Leucine, Isoleucine and Valine Metabolism                    | 1.494574874  | 0.579735174  | 0.372514241 | 0.642534052 |
| M4368 | gamma-CEHC                                                          | Cofactors and Vitamins            | Tocopherol Metabolism                                        | 2.104146235  | 1.073234973  | 0.373257005 | 0.642534052 |
| M3128 | sphingomyelin (d18:2/23:0, d18:1/23:1, d17:1/24:1)*                 | Lipid                             | Sphingomyelins                                               | 0.891396435  | -0.185869094 | 0.373254425 | 0.642591173 |
| M2333 | 1-stearoyl-2-arachidonoyl-GPC (18:0/20:4)                           | Lipid                             | Phosphatidylcholine (PC)                                     | 0.910397394  | -1.134575325 | 0.377324954 | 0.648371235 |
| M1164 | Fibrinopeptide A (8-16)                                             | Peptide                           | Fibrinogen Cleavage Peptide                                  | 0.842942262  | -0.246404272 | 0.378863657 | 0.649786913 |
| M2283 | 1-palmitoyl-2-oleoyl-GPC (16:0/18:1)                                | Lipid                             | Phosphatidylcholine (PC)                                     | 0.890259652  | -0.167701923 | 0.381946845 | 0.653841209 |
| M1487 | butyrate/isobutyrate (4:0)                                          | Lipid                             | Short Chain Fatty Acid                                       | 2.171088632  | 1.118418624  | 0.386510246 | 0.660409424 |
| M2031 | 9,10-DIHOME                                                         | Lipid                             | Fatty Acid, Dihydroxy                                        | 0.561087643  | -0.833701954 | 0.38820277  | 0.662056882 |
| M3453 | cholate                                                             | Lipid                             | Primary Bile Acid Metabolism                                 | 7.60060134   | 2.926010834  | 0.389648461 | 0.663277999 |
| M2556 | 1-stearoyl-2-arachidonoyl-GPI (18:0/20:4)                           | Lipid                             | Phosphatidylinositol (PI)                                    | 0.821414001  | -0.283818556 | 0.391114401 | 0.664528955 |
| M3281 | Salpha-pregnan-diol disulfate                                       | Lipid                             | Progestin Steroids                                           | 2.154114863  | 1.10709518   | 0.392470437 | 0.665588857 |
| M4959 | mannonate*                                                          | Xenobiotics                       | Food Component/Plant                                         | 1.506410809  | 0.591115257  | 0.395237043 | 0.669032537 |
| M1262 | ribitol                                                             | Carbohydrate                      | Pentose Metabolism                                           | 0.93603576   | -0.095367814 | 0.396681748 | 0.670229943 |
| M1974 | 2-hydroxybehenate                                                   | Lipid                             | Fatty Acid, Monohydroxy                                      | 0.773169512  | -0.371143346 | 0.397734543 | 0.670763484 |
| M1924 | 3-hydroxyoctanoylcarnitine (1)                                      | Lipid                             | Fatty Acid Metabolism (Acyl Carnitine, Hydroxy)              | 0.650154152  | -0.621146272 | 0.399142101 | 0.671889204 |
| M1178 | Fibrinopeptide B (1-11)                                             | Peptide                           | Fibrinogen Cleavage Peptide                                  | 0.802651381  | -0.317154583 | 0.404742288 | 0.677344028 |
| M637  | gamma-glutamylhistidine                                             | Peptide                           | Gamma-glutamyl Amino Acid                                    | 0.797782462  | -0.325932687 | 0.405363202 | 0.677344028 |
| M2182 | linoleoyl ethanolamide                                              | Lipid                             | Endocannabinoid                                              | 0.778792069  | -0.360689903 | 0.404031906 | 0.677344028 |
| M5117 | pyrraline                                                           | Xenobiotics                       | Food Component/Plant                                         | 0.680591225  | -0.555139545 | 0.404191212 | 0.677344028 |
| M1567 | linoleate (18:2n6)                                                  | Lipid                             | Long Chain Polyunsaturated Fatty Acid (n3 and n6)            | 0.774394416  | -0.368859545 | 0.406982856 | 0.678025898 |
| M2262 | 1-myristoyl-2-palmitoyl-GPC (14:0/16:0)                             | Lipid                             | Phosphatidylcholine (PC)                                     | 1.464372875  | 0.550282955  | 0.422235299 | 0.689501305 |
| M2721 | 1-stearoyl-GPI (18:0)                                               | Lipid                             | Lysophospholipid                                             | 0.881071915  | -0.182668315 | 0.424102708 | 0.689501305 |
| M448  | 2,3-dihydroxy-5-methylthio-4-pentenoate (DMTPA)*                    | Amino Acid                        | Methionine, Cysteine, SAM and Taurine Metabolism             | 0.913293445  | -0.130849616 | 0.422171646 | 0.689501305 |
| M1973 | 2-hydroxyarachidate*                                                | Lipid                             | Fatty Acid, Monohydroxy                                      | 0.757487626  | -0.400705774 | 0.426480114 | 0.689501305 |
| M3253 | 21-hydroxypregnenolone disulfate                                    | Lipid                             | Pregnenolone Steroids                                        | 1.33999659   | 0.42222933   | 0.422294676 | 0.689501305 |
| M5386 | 3-(methylthio)acetaminophen sulfate*                                | Xenobiotics                       | Drug - Analgesics, Anesthetics                               | 0.603057634  | -0.729632208 | 0.425160418 | 0.689501305 |
| M72   | 3-methylhistidine                                                   | Amino Acid                        | Histidine Metabolism                                         | 1.221816915  | 0.289028118  | 0.41578553  | 0.689501305 |
| M46   | alpha-ketoglutarate*                                                | Amino Acid                        | Glutamate Metabolism                                         | 0.879239633  | -0.185671676 | 0.423568765 | 0.689501305 |
| M275  | anthranilate                                                        | Amino Acid                        | Tryptophan Metabolism                                        | 0.834604987  | -0.26082676  | 0.418187684 | 0.689501305 |
| M3100 | behenoyl dihydrodihydroxyphenyl (d18:0/22:0)*                       | Lipid                             | Dihydrodihydroxyphenyls                                      | 1.239095399  | 0.309287266  | 0.427432206 | 0.689501305 |
| M6448 | bilirubin degradation product, C17H20N2O5 (1)                       | Partially Characterized Molecules | Partially Characterized Molecules                            | 0.664441294  | -0.589786658 | 0.418572866 | 0.689501305 |
| M1161 | Fibrinopeptide A (3-16)                                             | Peptide                           | Fibrinogen Cleavage Peptide                                  | 1.37967507   | 0.464330037  | 0.418984059 | 0.689501305 |
| M1166 | ADPGEGDFXAEAGGVR*                                                   | Peptide                           | Fibrinogen Cleavage Peptide                                  | 1.256625933  | 0.329555259  | 0.419916434 | 0.689501305 |
| M2242 | glycerophosphoinositol*                                             | Lipid                             | Phospholipid Metabolism                                      | 0.7502017981 | -0.411160938 | 0.421552525 | 0.689501305 |
| M3517 | glycoursodeoxycholic acid sulfate (1)                               | Lipid                             | Secondary Bile Acid Metabolism                               | 1.541821386  | 0.624635644  | 0.42661285  | 0.689501305 |
| M4501 | guaiacol sulfate                                                    | Xenobiotics                       | Benzoate Metabolism                                          | 1.923079497  | 0.943418402  | 0.422418589 | 0.689501305 |
| M47   | N-acetylglutamate                                                   | Amino Acid                        | Glutamate Metabolism                                         | 0.72903972   | -0.455930676 | 0.416211333 | 0.689501305 |
| M1852 | octanoylcarnitine (C8)                                              | Lipid                             | Fatty Acid Metabolism (Acyl Carnitine, Medium Chain)         | 0.761478483  | -0.393124823 | 0.427809391 | 0.689501305 |
| M1187 | phenylacetylglutamine                                               | Peptide                           | Acetylated Peptides                                          | 1.512980923  | 0.597397396  | 0.427717345 | 0.689501305 |
| M2429 | 1-stearoyl-2-linoleoyl-GPE (18:0/18:2)*                             | Lipid                             | Phosphatidylethanolamine (PE)                                | 0.840774395  | -0.250209061 | 0.431330788 | 0.691498565 |
| M1157 | ADSGEGDFXAEAGGVR*                                                   | Peptide                           | Fibrinogen Cleavage Peptide                                  | 1.336151224  | 0.4180833    | 0.431171933 | 0.691498565 |
| M4407 | heme                                                                | Cofactors and Vitamins            | Hemoglobin and Porphyrin Metabolism                          | 3.331855222  | 1.736325713  | 0.430538438 | 0.691498565 |
| M3125 | sphingomyelin (d18:2/21:0, d16:2/23:0)*                             | Lipid                             | Sphingomyelins                                               | 0.889016476  | -0.169717938 | 0.433406905 | 0.693603656 |
| M1418 | N-acetylneuraminate                                                 | Carbohydrate                      | Aminousugar Metabolism                                       | 0.85413892   | -0.227457361 | 0.434297194 | 0.693806941 |
| M6152 | dimethyl sulfone                                                    | Xenobiotics                       | Chemical                                                     | 1.661383623  | 0.732385239  | 0.436409966 | 0.695229132 |
| M494  | homocitrulline                                                      | Amino Acid                        | Urea cycle; Arginine and Proline Metabolism                  | 0.828606549  | -0.271240872 | 0.43671709  | 0.695229132 |
| M4504 | 4-ethylcatechol sulfate                                             | Xenobiotics                       | Benzoate Metabolism                                          | 5.532031622  | 2.467809403  | 0.440884248 | 0.700635982 |
| M2723 |                                                                     |                                   |                                                              |              |              |             |             |

|       |                                                                 |                                   |                                                      |              |              |             |             |
|-------|-----------------------------------------------------------------|-----------------------------------|------------------------------------------------------|--------------|--------------|-------------|-------------|
| M1352 | mannose                                                         | Carbohydrate                      | Fructose, Mannose and Galactose Metabolism           | 1.341040828  | 0.42335316   | 0.460468476 | 0.716722337 |
| M487  | ornithine                                                       | Amino Acid                        | Urea cycle; Arginine and Proline Metabolism          | 0.835581537  | -0.25914748  | 0.458640494 | 0.716722337 |
| M4530 | 4-vinylcatechol sulfate                                         | Xenobiotics                       | Benzoate Metabolism                                  | 7.999826657  | 2.999427616  | 0.462536141 | 0.718710004 |
| M1498 | (2 or 3)-decanoate (10:1n7 or n8)                               | Lipid                             | Medium Chain Fatty Acid                              | 0.651796769  | -0.617505894 | 0.463687492 | 0.719269505 |
| M4967 | N-(2-furyl)glycine                                              | Xenobiotics                       | Food Component/Plant                                 | 8.704316118  | 3.121730952  | 0.467119519 | 0.723558847 |
| M4410 | bilirubin (E,Z or Z,E)*                                         | Cofactors and Vitamins            | Hemoglobin and Porphyrin Metabolism                  | 0.850693708  | -0.233288311 | 0.471820143 | 0.729395425 |
| M3340 | androsterone glucuronide                                        | Lipid                             | Androgenic Steroids                                  | 0.715286498  | -0.483406885 | 0.480313579 | 0.731331731 |
| M1671 | maleate                                                         | Lipid                             | Fatty Acid, Dicarboxylate                            | 1.203364864  | 0.267074138  | 0.474460498 | 0.731331731 |
| M2915 | palmitoleyl-arachidonoyl-glycerol (16:1/20:4) [2]*              | Lipid                             | Diacylglycerol                                       | 0.829138102  | -0.270315676 | 0.478110779 | 0.731331731 |
| M62   | 5-1-pyrroline-5-carboxylate                                     | Amino Acid                        | Glutamate Metabolism                                 | 0.654037133  | -0.611972002 | 0.479110124 | 0.731331731 |
| M3114 | sphingomyelin (d18:1/24:0, d18:1/14:1)*                         | Lipid                             | Sphingomyelins                                       | 1.159844341  | 0.213931199  | 0.477482831 | 0.731331731 |
| M5151 | trans-3,4-methyleneheptanoate                                   | Xenobiotics                       | Food Component/Plant                                 | 0.682453157  | -0.551198071 | 0.47678289  | 0.731331731 |
| M6254 | 3-hydroxy-2-methylpyridine sulfate                              | Xenobiotics                       | Chemical                                             | 6.553480703  | 2.712261358  | 0.479692969 | 0.731331731 |
| M3307 | cortisol 21-sulfate                                             | Lipid                             | Corticosteroids                                      | 1.331214335  | 0.42761407   | 0.479647059 | 0.731331731 |
| M5404 | saliicyluric glucuronide*                                       | Xenobiotics                       | Drug - Analgesics, Anesthetics                       | 6.063582225  | 2.60170357   | 0.476533189 | 0.731331731 |
| M353  | isovalerylglycine                                               | Amino Acid                        | Leucine, Isoleucine and Valine Metabolism            | 0.642670318  | -0.637849253 | 0.48425817  | 0.73610481  |
| M5116 | 4-vinylguaiacol sulfate                                         | Xenobiotics                       | Food Component/Plant                                 | 5.978191872  | 2.579709201  | 0.485935317 | 0.73742104  |
| M2809 | 1-(1-enyl-stearoyl)-2-oleoyl-GPE (P-18:0/18:1)                  | Lipid                             | Plasmalogen                                          | 0.880558471  | -0.183509289 | 0.487844271 | 0.737854313 |
| M2310 | 1-palmitoleyl-2-linolenyl-GPC (16:1/18:3)*                      | Lipid                             | Phosphatidylcholine (PC)                             | 0.706102811  | -0.502049835 | 0.487350737 | 0.737854313 |
| M2278 | 1,2-dipalmitoyl-GPC (16:0/16:0)                                 | Lipid                             | Phosphatidylcholine (PC)                             | 0.923592506  | -0.114671628 | 0.491030196 | 0.740080038 |
| M2543 | 1-stearoyl-2-linoleoyl-GPI (18:0/18:2)                          | Lipid                             | Phosphatidylinositol (PI)                            | 0.833570933  | -0.262623124 | 0.497499991 | 0.740080038 |
| M6221 | 3-hydroxypyridine sulfate                                       | Xenobiotics                       | Chemical                                             | 4.427142686  | 2.146375872  | 0.494445841 | 0.740080038 |
| M204  | 3-methoxytyrosine                                               | Amino Acid                        | Tyrosine Metabolism                                  | 0.789668634  | -0.340680707 | 0.496850328 | 0.740080038 |
| M347  | alpha-hydroxyisocaproate                                        | Amino Acid                        | Leucine, Isoleucine and Valine Metabolism            | 0.860419186  | -0.216888399 | 0.495268978 | 0.740080038 |
| M6435 | GlcNAc sulfate conjugate of C21H34O2 steroid                    | Partially Characterized Molecules | Partially Characterized Molecules                    | 1.645356699  | 0.718400382  | 0.492743776 | 0.740080038 |
| M1490 | heptanoate (7:0)                                                | Lipid                             | Medium Chain Fatty Acid                              | 0.851988292  | -0.23109449  | 0.495062606 | 0.740080038 |
| M3283 | pregnanediol-3-glucuronide                                      | Lipid                             | Progestin Steroids                                   | 1.31511022   | 0.395183718  | 0.498217484 | 0.740080038 |
| M3119 | sphingomyelin (d18:1/18:1, d18:2/18:0)                          | Lipid                             | Sphingomyelins                                       | 0.913119351  | -0.131124651 | 0.498271709 | 0.740080038 |
| M6252 | 5-hydroxy-2-methylpyridine sulfate                              | Xenobiotics                       | Chemical                                             | 5.441090336  | 2.443895781  | 0.494497147 | 0.740080038 |
| M219  | gentisate                                                       | Amino Acid                        | Tyrosine Metabolism                                  | 1.626953061  | 0.702172628  | 0.497886102 | 0.740080038 |
| M515  | prolylhydroxyproline                                            | Amino Acid                        | Urea cycle; Arginine and Proline Metabolism          | 1.650696477  | 0.723074868  | 0.500180499 | 0.741703219 |
| M4466 | 2-hydroxyhippurate (salicylurate)                               | Xenobiotics                       | Benzoate Metabolism                                  | 4.406142133  | 2.139516034  | 0.513373731 | 0.751459573 |
| M181  | 3-(4-hydroxyphenyl)lactate (HPLA)                               | Amino Acid                        | Tyrosine Metabolism                                  | 0.836135693  | -0.258191004 | 0.5084945   | 0.751459573 |
| M1781 | hexanoylglutamine                                               | Lipid                             | Fatty Acid Metabolism (Acyl Glutamine)               | 0.82297469   | -0.281080033 | 0.511093891 | 0.751459573 |
| M1756 | N-acetyl-2-aminooctanoate*                                      | Lipid                             | Fatty Acid, Amino                                    | 1.2069192135 | -0.310804386 | 0.511043099 | 0.751459573 |
| M419  | N-carbamoylvaline                                               | Amino Acid                        | Leucine, Isoleucine and Valine Metabolism            | 0.895738339  | 0.368012686  | 0.508567967 | 0.751459573 |
| M1325 | sucrose                                                         | Carbohydrate                      | Disaccharides and Oligosaccharides                   | 0.582323068  | -0.830528864 | 0.513182268 | 0.751459573 |
| M3536 | taurochenolate sulfate*                                         | Lipid                             | Secondary Bile Acid Metabolism                       | 0.760258827  | -0.395418837 | 0.511234331 | 0.751459573 |
| M228  | vanillic alcohol sulfate                                        | Amino Acid                        | Tyrosine Metabolism                                  | 0.614627135  | -0.202216633 | 0.511947116 | 0.751459573 |
| M1095 | 5-hydroxyhexanoate                                              | Lipid                             | Fatty Acid, Monohydroxy                              | 0.704028304  | -0.506704663 | 0.511640714 | 0.753466034 |
| M5959 | salicylate                                                      | Xenobiotics                       | Drug - Topical Agents                                | 3.902796217  | 1.964508135  | 0.515909038 | 0.753466034 |
| M1120 | 1,5-anhydroglucitol (1,5-AG)                                    | Carbohydrate                      | Glycolysis, Gluconeogenesis, and Pyruvate Metabolism | 0.633926904  | -0.657611596 | 0.517351979 | 0.753624547 |
| M2649 | 1-lignoceryl-GPC (24:0)                                         | Lipid                             | Lysophospholipid                                     | 0.720576376  | -0.472776741 | 0.518444696 | 0.754025967 |
| M3129 | sphingomyelin (d18:1/24:1, d18:2/24:0)*                         | Lipid                             | Sphingomyelins                                       | 0.902526868  | -0.147958213 | 0.519690196 | 0.75462297  |
| M1925 | 3-hydroxyoctanoylcarnitine (2)                                  | Lipid                             | Fatty Acid Metabolism (Acyl Carnitine, Hydroxy)      | 0.699151625  | -0.516322729 | 0.523414134 | 0.75598096  |
| M1929 | 3-hydroxydecanoylcarnitine                                      | Lipid                             | Fatty Acid Metabolism (Acyl Carnitine, Hydroxy)      | 0.656543509  | -0.607037473 | 0.524648992 | 0.75598096  |
| M3051 | ceramide (d16:1/24:1, d18:1/22:1)*                              | Lipid                             | Ceramides                                            | 0.920943671  | -0.118815177 | 0.524778862 | 0.75598096  |
| M4429 | retinol (Vitamin A)                                             | Cofactors and Vitamins            | Vitamin A Metabolism                                 | 0.912506507  | -0.132092349 | 0.523880608 | 0.75598096  |
| M513  | hydroxyproline                                                  | Amino Acid                        | Urea cycle; Arginine and Proline Metabolism          | 0.82465941   | -0.278129695 | 0.52211889  | 0.75598096  |
| M2425 | 1-stearoyl-2-oleoyl-GPE (18:0/18:1)                             | Lipid                             | Phosphatidylethanolamine (PE)                        | 0.86780539   | -0.204556548 | 0.526063713 | 0.756574761 |
| M3337 | dehydroepiandrosterone sulfate (DHEA-S)                         | Lipid                             | Androgenic Steroids                                  | 1.289856914  | 0.367211034  | 0.527688007 | 0.756574761 |
| M226  | tyramine O-sulfate                                              | Amino Acid                        | Tyrosine Metabolism                                  | 3.886669964  | 1.958534607  | 0.527198403 | 0.756574761 |
| M4603 | 5-acetylamino-6-amino-3-methyluracil                            | Xenobiotics                       | Xanthine Metabolism                                  | 0.790514531  | -0.339136112 | 0.533938805 | 0.764331297 |
| M6450 | bilirubin degradation product, C16H18N2O5 (3)                   | Partially Characterized Molecules | Partially Characterized Molecules                    | 1.505962932  | 0.59068626   | 0.537341427 | 0.7655852   |
| M1689 | dodecadienoate (12:2)*                                          | Lipid                             | Fatty Acid, Dicarboxylate                            | 0.732362393  | -0.449370385 | 0.537247101 | 0.7655852   |
| M4506 | 4-allylcatechol sulfate                                         | Xenobiotics                       | Benzoate Metabolism                                  | 2.596446032  | 1.376538239  | 0.535973196 | 0.7655852   |
| M6443 | bilirubin degradation product, C16H18N2O5 (1)                   | Partially Characterized Molecules | Partially Characterized Molecules                    | 1.550031668  | 0.632297691  | 0.542677742 | 0.771978197 |
| M1659 | glutarate (C5-CO)                                               | Lipid                             | Fatty Acid, Dicarboxylate                            | 0.789234442  | -0.341474719 | 0.543691325 | 0.772211585 |
| M6433 | branched-chain, straight-chain, or cyclopropyl 12:1 fatty acid* | Partially Characterized Molecules | Partially Characterized Molecules                    | 0.742892323  | -0.428774978 | 0.544959517 | 0.772805306 |
| M4590 | caffeine                                                        | Xenobiotics                       | Xanthine Metabolism                                  | 2.040075303  | 1.028622406  | 0.545916255 | 0.772956193 |
| M2850 | 1-pentadecanoylglycerol (15:0)                                  | Lipid                             | Monoaacylglycerol                                    | 0.642889256  | -0.637357855 | 0.552347343 | 0.774803847 |
| M96   | 1-ribosyl-imidazoleacetate*                                     | Amino Acid                        | Histidine Metabolism                                 | 1.12352479   | 0.168031957  | 0.555766169 | 0.774803847 |
| M2339 | 1-stearoyl-2-docosahexaenoyl-GPC (18:0/22:6)                    | Lipid                             | Phosphatidylcholine (PC)                             | 0.895290073  | -0.159572906 | 0.554688792 | 0.774803847 |
| M4772 | 2,3-dihydroxyisovalerate                                        | Xenobiotics                       | Food Component/Plant                                 | 1.28498053   | 0.361464699  | 0.554829743 | 0.774803847 |
| M428  | 3-hydroxyisobutyrate                                            | Amino Acid                        | Leucine, Isoleucine and Valine Metabolism            | 0.813926184  | -0.297030134 | 0.559973772 | 0.774803847 |
| M6235 | 3-hydroxyindole sulfate                                         | Xenobiotics                       | Chemical                                             | 0.892039911  | -0.164819835 | 0.55447329  | 0.774803847 |
| M4411 | biliverdin                                                      | Cofactors and Vitamins            | Hemoglobin and Porphyrin Metabolism                  | 1.764384586  | 0.819165062  | 0.552412157 | 0.774803847 |
| M255  | N-acetyltryptophan                                              | Amino Acid                        | Tryptophan Metabolism                                | 1.163438312  | 0.218394717  | 0.551051933 | 0.774803847 |
| M3102 | sphingomyelin (d18:0/20:0, d16:0/22:0)*                         | Lipid                             | Dihydrosphingomyelins                                | 1.329093305  | 0.410442388  | 0.55136669  | 0.774803847 |
| M3111 | sphingomyelin (d18:2/24:2)*                                     | Lipid                             | Sphingomyelins                                       | 0.914678345  | -0.128663599 | 0.556597263 | 0.774803847 |
| M202  | vanillylmandelate (VMA)                                         | Amino Acid                        | Tyrosine Metabolism                                  | 1.26112472   | 0.334710959  | 0.555218628 | 0.774803847 |
| M2708 | 1-palmitoyl-GPG (16:0)*                                         | Lipid                             | Lysophospholipid                                     | 0.798066345  | -0.325419408 | 0.55892841  | 0.776859212 |
| M1686 | dodecadienoate (C12)                                            | Xenobiotics                       | Fatty Acid, Dicarboxylate                            | 1.804782272  | 0.851824802  | 0.565402066 | 0.784657218 |
| M4594 | 1-methylurate                                                   | Xenobiotics                       | Xanthine Metabolism                                  | 1.271720072  | 0.346781143  | 0.566975506 | 0.785641364 |
| M1431 | erythronate*                                                    | Carbohydrate                      | Aminosugar Metabolism                                | 1.082123858  | 0.113865637  | 0.571101421 | 0.790154021 |
| M5936 | diphenhydramine                                                 | Xenobiotics                       | Drug - Respiratory                                   | 2.530016651  | 1.33914688   | 0.57299944  | 0.791575214 |
| M3098 | myristoyl dihydrosphingomyelin (d18:0/14:0)*                    | Lipid                             | Dihydrosphingomyelins                                | 1.429327552  | 0.51533657   | 0.574036766 | 0.791804887 |
| M340  | 1-carboxyethylleucine                                           | Amino Acid                        | Leucine, Isoleucine and Valine Metabolism            | 0.912062817  | -0.132794903 | 0.586415994 | 0.793550684 |
| M4600 | 1-methylxanthine                                                | Xenobiotics                       | Xanthine Metabolism                                  | 0.713007682  | -0.488010475 | 0.58222367  | 0.793550684 |
| M1966 | 2-hydroxylaurate                                                | Lipid                             | Fatty Acid, Monohydroxy                              | 1.207330815  | 0.271821035  | 0.586292241 | 0.793550684 |
| M5129 | 2-keto-3-deoxy-glucuronate                                      | Xenobiotics                       | Food Component/Plant                                 | 1.230125916  | 0.298805998  | 0.580225833 | 0.793550684 |
| M4502 | 3-methyl catechol sulfate (1)                                   | Xenobiotics                       | Benzoate Metabolism                                  | 2.261349541  | 1.177184009  | 0.577394317 | 0.793550684 |
| M1277 | arabitol/xylitol                                                | Carbohydrate                      | Pentose Metabolism                                   | 1.077265482  | 0.107373832  | 0.582554472 | 0.793550684 |
| M6447 | bilirubin degradation product, C17H18N2O4 (3)                   | Partially Characterized Molecules | Partially Characterized Molecules                    | 0.745097565  | -0.424498747 | 0.586651331 | 0.793550684 |
| M1491 | caprylate (8:0)                                                 | Lipid                             | Medium Chain Fatty Acid                              | 2.192552426  | 1.13261134   | 0.582955006 | 0.793550684 |
| M3050 | ceramide (d18:1/20:0, d16:1/22:0, d20:1/18:0)*                  | Lipid                             | Ceramides                                            | 0.961904391  | -0.056034591 | 0.586381325 | 0.793550684 |
| M1564 | docosatrienoate (22:3n3)                                        | Lipid                             | Long Chain Polyunsaturated Fatty Acid (n3 and n6)    | 0.798055823  | -0.325438431 | 0.578236375 | 0.793550684 |
| M4407 | ethylmalonate                                                   | Amino Acid                        | Leucine, Isoleucine and Valine Metabolism            | 1.142707654  | 0.192456357  | 0.578251533 | 0.793550684 |
| M6417 | glycine conjugate of C10H12O2*                                  | Partially Characterized Molecules | Partially Characterized Molecules                    | 0.904175319  | -0.145325558 | 0.583740051 | 0.793550684 |
| M6239 | thiopropine                                                     | Xenobiotics                       | Chemical                                             | 1.151468073  | 0.203474409  | 0.585645189 | 0.793550684 |
| M1184 | phenylacetylcarnitine                                           | Peptide                           | Acetylated Peptides                                  | 1.557330862  | 0.639075484  | 0.588345789 | 0.794660212 |
| M2452 | 1,2-diinoleoyl-GPE (18:2/18:2)*                                 | Lipid                             | Phosphatidylethanolamine (PE)                        | 0.810077601  | -0.303867979 | 0.593182262 | 0.79881878  |
| M1860 | decanoylcarnitine (C10)                                         | Lipid                             | Fatty Acid Metabolism (Acyl Carnitine, Medium Chain) | 0.805422381  | -0.312182532 | 0.592853106 | 0.79881878  |
| M1982 | 3-hydroxydecanoate                                              | Lipid                             | Fatty Acid, Monohydroxy                              | 0.820282856  | -0.285806619 | 0.59711181  | 0.800551716 |
| M3360 | androstenediol (3beta,17beta) monosulfate (1)                   | Lipid                             | Androgenic Steroids                                  | 0.873283605  | -0.19547784  | 0.5965837   | 0.800551716 |
| M3121 | sphingomyelin (d18:1/20:0, d16:1/22:0)*                         | Lipid                             | Sphingomyelins                                       | 1.052218722  | 0.073434626  | 0.595414087 | 0.800551716 |
| M367  | 3-methylglutaconate                                             | Amino Acid                        | Leucine, Isoleucine and Valine Metabolism            | 1.329095401  | 0.410446664  | 0.598228348 | 0.800553727 |
| M1517 | arachidate (20:0)                                               | Lipid                             | Long Chain Saturated Fatty Acid                      | 0.813159841  | -0.298389127 | 0.602396864 | 0.800553727 |
| M1462 | citraconate/glutaconate                                         | Energy                            | TCA Cycle                                            | 1.775881704  | 0.828535484  | 0.600854188 | 0.800553727 |
| M2172 | N-oleoyltaurine                                                 | Lipid                             | Endocannabinoid                                      | 0.786838351  | -0.345860818 | 0.600053975 | 0.800553727 |
| M460  | 5-carboxyethylcysteine                                          | Amino Acid                        | Methionine, Cysteine, SAM and Taurine Metabolism     | 0.775149038  | -0.36745437  | 0.601094576 | 0.800553727 |
| M5203 | caffeic acid sulfate                                            | Xenobiotics                       | Food Component/Plant                                 | 2.38856392   | 1.256143485  | 0.602111466 | 0.800553727 |
| M1189 | 4-hydroxyphenylacetylglutamine                                  | Peptide                           | Acetylated Peptides                                  | 1.07818696   | 0.772154825  | 0.60774201  | 0.804824643 |
| M4505 | 4-methylcatechol sulfate                                        | Xenobiotics                       | Benzoate Metabolism                                  | 1.709301774  | 0.773407125  | 0.608266809 | 0.804824643 |
| M4584 | 2-methoxyhydroquinone sulfate (1)                               | Xenobiotics                       | Benzoate Metabolism                                  | 1.563118253  | 0.644426925  | 0.606573346 | 0.804824643 |
| M4364 | delta-tocopherol                                                | Cofactors and Vitamins            | Tocopherol Metabolism                                | 1.447562673  | 0.533625811  | 0.615368416 | 0.811857605 |
| M1683 | undecadienoate (C11-DC)                                         | Lipid                             | Fatty Acid, Dicarboxylate                            | 1.294757801  | 0.372682251  | 0.614604068 | 0.811857605 |
| M454  | alpha-ketobutyrate                                              | Amino Acid                        | Methionine, Cysteine, SAM and Taurine Metabolism     | 1.229214432  | 0.297736611  | 0.618480066 | 0.814780261 |
| M6089 | O-sulfo-L-tyrosine                                              | Xenobiotics                       | Chemical                                             | 0.940461399  | -0.088559365 | 0.620830811 | 0.816693498 |
|       |                                                                 |                                   |                                                      |              |              |             |             |

|       |                                                                 |                                   |                                                         |             |              |              |             |
|-------|-----------------------------------------------------------------|-----------------------------------|---------------------------------------------------------|-------------|--------------|--------------|-------------|
| M4322 | trigonelline (N'-methylnicotinate)                              | Cofactors and Vitamins            | Nicotinate and Nicotinamide Metabolism                  | 1.230856187 | 0.299662207  | 0.632324053  | 0.820773844 |
| M279  | 8-methoxymyrene                                                 | Amino Acid                        | Tryptophan Metabolism                                   | 0.744701411 | -0.425266004 | 0.633864949  | 0.820773844 |
| M420  | 1-carboxyethylvaline                                            | Amino Acid                        | Leucine, Isoleucine and Valine Metabolism               | 0.914502206 | -0.128941444 | 0.641750899  | 0.822468444 |
| M5961 | 2,6-dihydroxybenzoic acid                                       | Xenobiotics                       | Drug - Topical Agents                                   | 1.240431695 | 0.315023243  | 0.644945652  | 0.822468444 |
| M1755 | 2-aminooctanoate                                                | Lipid                             | Fatty Acid, Amino                                       | 0.806856899 | -0.30961527  | 0.6478480931 | 0.822468444 |
| M1927 | 3-hydroxydecanoyl carnitine                                     | Lipid                             | Fatty Acid Metabolism (Acyl Carnitine, Hydroxy)         | 0.763093569 | -0.390068127 | 0.646790957  | 0.822468444 |
| M447  | 5-methylthioribose                                              | Amino Acid                        | Methionine, Cysteine, SAM and Taurine Metabolism        | 1.088762466 | 0.122689237  | 0.646384234  | 0.822468444 |
| M4139 | AMP                                                             | Nucleotide                        | Purine Metabolism, Adenine containing                   | 0.932177703 | -0.101323089 | 0.643986702  | 0.822468444 |
| M3368 | androstenediol (3alpha,17alpha) monosulfate (3)                 | Lipid                             | Androgenic Steroids                                     | 0.840803839 | -0.250158839 | 0.63710967   | 0.822468444 |
| M4432 | carotene diol (2)                                               | Cofactors and Vitamins            | Vitamin A Metabolism                                    | 1.185608389 | 0.245627561  | 0.642872403  | 0.822468444 |
| M462  | cystine                                                         | Amino Acid                        | Methionine, Cysteine, SAM and Taurine Metabolism        | 0.930677114 | -0.103647364 | 0.640066358  | 0.822468444 |
| M1543 | eicosenoate (20:1n9 or 1n11)                                    | Lipid                             | Long Chain Monounsaturated Fatty Acid                   | 0.807285664 | -0.308848824 | 0.646856921  | 0.822468444 |
| M77   | hydantoin-5-propionate                                          | Amino Acid                        | Histidine Metabolism                                    | 1.194515656 | 0.256425763  | 0.647133426  | 0.822468444 |
| M1533 | oleate/vaccenate (18:1)                                         | Lipid                             | Long Chain Monounsaturated Fatty Acid                   | 0.858065267 | -0.220840706 | 0.643071564  | 0.822468444 |
| M4591 | paraxanthine                                                    | Xenobiotics                       | Xanthine Metabolism                                     | 1.373317358 | 0.457655055  | 0.636692214  | 0.822468444 |
| M4592 | theobromine                                                     | Xenobiotics                       | Xanthine Metabolism                                     | 0.768182704 | -0.380478613 | 0.647524717  | 0.822468444 |
| N3401 | 11beta-hydroxyandrostosterone glucuronide                       | Lipid                             | Androgenic Steroids                                     | 1.349476159 | 0.432399489  | 0.652980229  | 0.822685588 |
| N3461 | glycochenodeoxycholate                                          | Lipid                             | Primary Bile Acid Metabolism                            | 1.615490883 | 0.691972609  | 0.652835528  | 0.822685588 |
| M1502 | laurate (12:0)                                                  | Lipid                             | Medium Chain Fatty Acid                                 | 1.52061766  | 0.604657451  | 0.653442238  | 0.822685588 |
| M4905 | quinate                                                         | Xenobiotics                       | Food Component/Plant                                    | 1.514856446 | 0.599181085  | 0.651079894  | 0.822685588 |
| M3124 | sphingomyelin (d18:1/21:0, d17:1/22:0, d16:1/23:0)*             | Lipid                             | Sphingomyelins                                          | 1.048340939 | 0.068107983  | 0.651442537  | 0.822685588 |
| M2243 | trimethylamine N-oxide                                          | Lipid                             | Phospholipid Metabolism                                 | 1.595505232 | 0.674013339  | 0.652131001  | 0.822685588 |
| M3519 | taurosoodeoxycholic acid sulfate (1)                            | Lipid                             | Secondary Bile Acid Metabolism                          | 1.215090366 | 0.28103631   | 0.661728863  | 0.830817039 |
| M1550 | tetradecadienoate (14:2)*                                       | Lipid                             | Long Chain Polyunsaturated Fatty Acid (n3 and n6)       | 0.799645791 | -0.322567006 | 0.661627202  | 0.830817039 |
| M576  | cysteinylglycine                                                | Amino Acid                        | Glutathione Metabolism                                  | 1.226381228 | 0.29440572   | 0.663537156  | 0.83193831  |
| M58   | carboxyethyl-GABA                                               | Amino Acid                        | Glutamate Metabolism                                    | 1.328091018 | 0.409354023  | 0.665790758  | 0.833614048 |
| M2030 | 12,13-DiHOME                                                    | Lipid                             | Fatty Acid, Dihydroxy                                   | 0.684552543 | -0.546766815 | 0.668684994  | 0.835703325 |
| M80   | imidazole propionate                                            | Amino Acid                        | Histidine Metabolism                                    | 1.319148669 | 0.399607167  | 0.669298152  | 0.835703325 |
| M51   | 4-hydroxyglutamate                                              | Amino Acid                        | Glutamate Metabolism                                    | 1.12720312  | 0.172747511  | 0.67331503   | 0.839565654 |
| M2266 | 1-myrityl-2-arachidonoyl-GPC (14:0/20:4)*                       | Lipid                             | Phosphatidylcholine (PC)                                | 1.154917361 | 0.207789624  | 0.678327174  | 0.841199729 |
| M3339 | 16a-hydroxy DHEA 3-sulfate                                      | Lipid                             | Androgenic Steroids                                     | 1.518368355 | 0.60252183   | 0.677794836  | 0.841199729 |
| M3353 | etiocolanalone glucuronide                                      | Xenobiotics                       | Androgenic Steroids                                     | 1.230141831 | 0.298824663  | 0.678077588  | 0.841199729 |
| M5736 | ondansetron                                                     | Xenobiotics                       | Drug - Gastrointestinal                                 | 0.667146331 | -0.583924859 | 0.677703609  | 0.841199729 |
| M1165 | DSGEGDFXAEGGGVR*                                                | Peptide                           | Fibrinogen Cleavage Peptide                             | 1.123533429 | 0.168043051  | 0.682391062  | 0.845086478 |
| M2279 | 1-palmitoyl-2-palmitoleoyl-GPC (16:0/16:1)*                     | Lipid                             | Phosphatidylcholine (PC)                                | 1.195626585 | 0.257766881  | 0.685489525  | 0.847768678 |
| M3122 | sphingomyelin (d18:1/20:1, d18:2/20:0)*                         | Lipid                             | Sphingomyelins                                          | 0.961470326 | -0.056685763 | 0.687658937  | 0.849296159 |
| M3112 | sphingomyelin (d17:1/14:0, d16:1/15:0)*                         | Lipid                             | Sphingomyelins                                          | 1.174699446 | 0.232291682  | 0.68992981   | 0.850944636 |
| M578  | cys-gly, oxidized                                               | Amino Acid                        | Glutathione Metabolism                                  | 1.253379278 | 0.325823047  | 0.695933094  | 0.853715496 |
| M1223 | glucose                                                         | Carbohydrate                      | Glycolysis, Gluconeogenesis, and Pyruvate Metabolism    | 1.091767919 | 0.12666621   | 0.693409178  | 0.853715496 |
| M1706 | Hydroxy-CMPF*                                                   | Lipid                             | Fatty Acid, Dicarboxylate                               | 1.220669853 | 0.287673056  | 0.695641028  | 0.853715496 |
| M138  | N,N,N-trimethyl-5-aminovaleate                                  | Amino Acid                        | Lysine Metabolism                                       | 0.913158509 | -0.11062785  | 0.695597428  | 0.853715496 |
| M141  | N-acetylphenylalanine                                           | Amino Acid                        | Phenylalanine Metabolism                                | 0.885393885 | -0.175608685 | 0.697103783  | 0.853999109 |
| M1688 | dodecadienoate (C12:1-DC)*                                      | Lipid                             | Fatty Acid, Dicarboxylate                               | 0.883401195 | -0.178859311 | 0.703872055  | 0.861130146 |
| M1570 | dihomolinoleate (20:2n6)                                        | Lipid                             | Long Chain Polyunsaturated Fatty Acid (n3 and n6)       | 0.83736318  | -0.256074613 | 0.706085569  | 0.862671126 |
| M6451 | bilirubin degradation product, C16H18N2O5 (4)                   | Partially Characterized Molecules | Partially Characterized Molecules                       | 1.282475737 | 0.358931532  | 0.711761422  | 0.864961408 |
| M455  | cystine                                                         | Amino Acid                        | Methionine, Cysteine, SAM and Taurine Metabolism        | 1.15811938  | 0.211783975  | 0.71093677   | 0.864961408 |
| M5514 | fluconazole                                                     | Xenobiotics                       | Drug - Antibiotic                                       | 1.277754002 | 0.35361011   | 0.710951632  | 0.864961408 |
| M1690 | tridecadienoate (C13:1-DC)*                                     | Lipid                             | Fatty Acid, Dicarboxylate                               | 0.839751379 | -0.251965836 | 0.710369671  | 0.864961408 |
| M485  | urea                                                            | Amino Acid                        | Urea cycle; Arginine and Proline Metabolism             | 0.919967905 | -0.120344565 | 0.713540428  | 0.86596562  |
| M1960 | 2-hydroxyoctanoate                                              | Lipid                             | Fatty Acid, Monohydroxy                                 | 0.841178562 | -0.249516013 | 0.717760306  | 0.868767135 |
| M1668 | 3-hydroxyadipate                                                | Lipid                             | Fatty Acid, Dicarboxylate                               | 0.853722076 | -0.228161609 | 0.716900716  | 0.868767135 |
| M4336 | pantothenate (Vitamin B5)                                       | Cofactors and Vitamins            | Pantothenate and CoA Metabolism                         | 0.869657037 | -0.201481531 | 0.721083064  | 0.870470769 |
| M1681 | sebacate (C10-DC)                                               | Lipid                             | Fatty Acid, Dicarboxylate                               | 1.321438289 | 0.402109053  | 0.720875567  | 0.870470769 |
| M3012 | N-stearoyl-sphinganine (d18:0/18:0)*                            | Lipid                             | Dihydroceramides                                        | 1.169020853 | 0.225300665  | 0.722701552  | 0.871267521 |
| M2582 | 1-palmitoyl-GPA (16:0)                                          | Lipid                             | Lyso phospholipid                                       | 0.867404184 | -0.205223693 | 0.727298449  | 0.871406138 |
| M159  | 4-hydroxyphenylacetate                                          | Amino Acid                        | Phenylalanine Metabolism                                | 1.414356365 | 0.500145671  | 0.727347279  | 0.871406138 |
| M1704 | docosadienoate (C22-DC)                                         | Lipid                             | Fatty Acid, Dicarboxylate                               | 1.333515233 | 0.415234305  | 0.727609746  | 0.871406138 |
| M3099 | palmitoyl dihydroxy sphingomyelin (d18:0/16:0)*                 | Lipid                             | Dihydroxy sphingomyelins                                | 0.981179919 | -0.027410397 | 0.727202414  | 0.871406138 |
| M476  | succinyltaurine                                                 | Amino Acid                        | Methionine, Cysteine, SAM and Taurine Metabolism        | 1.30442825  | 0.383415981  | 0.726963148  | 0.871406138 |
| M3113 | sphingomyelin (d18:1/14:0, d16:1/16:0)*                         | Lipid                             | Sphingomyelins                                          | 1.046661544 | 0.065794998  | 0.729777783  | 0.872852638 |
| M2325 | 1-stearoyl-2-linoleoyl-GPC (18:0/18:2)*                         | Amino Acid                        | Phosphatidylcholine (PC)                                | 0.962634311 | -0.05494025  | 0.732442725  | 0.873740731 |
| M299  | indoleacetate                                                   | Amino Acid                        | Tryptophan Metabolism                                   | 1.306561774 | 0.385775337  | 0.731701027  | 0.873740731 |
| M348  | 2-ketocaprylate                                                 | Amino Acid                        | Leucine, Isoleucine and Valine Metabolism               | 0.867677738 | -0.204768781 | 0.737178156  | 0.877087622 |
| M4817 | N-acetylallin                                                   | Xenobiotics                       | Food Component/Plant                                    | 0.858197766 | -0.220617949 | 0.736999422  | 0.877087622 |
| M4349 | ascorbic acid 3-sulfate*                                        | Cofactors and Vitamins            | Ascorbate and Aldarate Metabolism                       | 1.251055046 | 0.323145269  | 0.738653336  | 0.877087622 |
| M1962 | 2-hydroxydecanoate                                              | Lipid                             | Fatty Acid, Monohydroxy                                 | 1.349103953 | 0.432001517  | 0.751249261  | 0.890318906 |
| M6444 | bilirubin degradation product, C16H18N2O5 (2)                   | Partially Characterized Molecules | Partially Characterized Molecules                       | 1.208420961 | 0.273123114  | 0.752216633  | 0.890318906 |
| M439  | methionine sulfone                                              | Amino Acid                        | Methionine, Cysteine, SAM and Taurine Metabolism        | 1.211533277 | 0.276834032  | 0.751854752  | 0.890318906 |
| M449  | 2-hydroxy-4-(methylthio)butanoic acid                           | Amino Acid                        | Methionine, Cysteine, SAM and Taurine Metabolism        | 1.196092699 | 0.258329204  | 0.755454878  | 0.890700475 |
| M4435 | beta-cryptoxanthin                                              | Cofactors and Vitamins            | Vitamin A Metabolism                                    | 0.863109537 | -0.212384432 | 0.755116897  | 0.890700475 |
| M363  | beta-hydroxyisovalerate                                         | Amino Acid                        | Leucine, Isoleucine and Valine Metabolism               | 0.925854092 | -0.111143242 | 0.758418226  | 0.890700475 |
| M6446 | bilirubin degradation product, C17H18N2O4 (2)                   | Partially Characterized Molecules | Partially Characterized Molecules                       | 0.839295179 | -0.2527498   | 0.755705622  | 0.890700475 |
| M4938 | indolin-2-one                                                   | Xenobiotics                       | Food Component/Plant                                    | 0.919666759 | -0.120816899 | 0.757177921  | 0.890700475 |
| M867  | leucylalanine                                                   | Peptide                           | Di peptide                                              | 1.257074731 | 0.330070418  | 0.757765602  | 0.890700475 |
| M1162 | Fibrinopeptide A [5-16]*                                        | Peptide                           | Fibrinogen Cleavage Peptide                             | 0.962410027 | -0.055276421 | 0.761050284  | 0.892638333 |
| M4433 | carotene diol (3)                                               | Cofactors and Vitamins            | Vitamin A Metabolism                                    | 1.120232983 | 0.163798812  | 0.763093485  | 0.893077207 |
| M6418 | glycine conjugate of C10H14O2 (1)*                              | Partially Characterized Molecules | Partially Characterized Molecules                       | 0.955615032 | -0.065498547 | 0.764371911  | 0.893077207 |
| M210  | homovanillate (HVA)                                             | Amino Acid                        | Tyrosine Metabolism                                     | 1.054551242 | 0.0766292    | 0.763535534  | 0.893077207 |
| M4636 | 2-piperidinone                                                  | Xenobiotics                       | Food Component/Plant                                    | 1.229085133 | 0.297584848  | 0.771393581  | 0.89438363  |
| M1936 | acetoacetate                                                    | Ketone Bodies                     | Ketone Bodies                                           | 0.879493563 | -0.185255076 | 0.768627017  | 0.89438363  |
| M3364 | androstenediol (3beta,17beta) disulfate (2)                     | Lipid                             | Androgenic Steroids                                     | 1.121779241 | 0.165788791  | 0.771260997  | 0.89438363  |
| M6445 | bilirubin degradation product, C17H18N2O4 (1)                   | Partially Characterized Molecules | Partially Characterized Molecules                       | 0.849936489 | -0.234573054 | 0.771141515  | 0.89438363  |
| M4552 | p-cresol sulfate                                                | Xenobiotics                       | Benzoate Metabolism                                     | 1.301246236 | 0.379893991  | 0.76907762   | 0.89438363  |
| M3462 | taurochenodeoxycholate                                          | Lipid                             | Primary Bile Acid Metabolism                            | 1.374010836 | 0.458393382  | 0.767470361  | 0.89438363  |
| M3526 | glycocholate                                                    | Lipid                             | Secondary Bile Acid Metabolism                          | 0.853912271 | -0.227840237 | 0.775449699  | 0.897941116 |
| M466  | lanthionine                                                     | Amino Acid                        | Methionine, Cysteine, SAM and Taurine Metabolism        | 1.081018819 | 0.112391638  | 0.776934455  | 0.898515801 |
| M2587 | 1-linoleoyl-GPA (18:2)*                                         | Lipid                             | Lyso phospholipid                                       | 0.881038493 | -0.182723042 | 0.778926781  | 0.898876591 |
| M4999 | phytanate                                                       | Xenobiotics                       | Food Component/Plant                                    | 0.839525165 | -0.252354524 | 0.779224152  | 0.898876591 |
| M97   | 4-imidazoleacetate                                              | Amino Acid                        | Histidine Metabolism                                    | 0.844555056 | -0.243736621 | 0.781426462  | 0.900274593 |
| M6190 | perfluorooctanesulfonate (PFOS)                                 | Xenobiotics                       | Chemical                                                | 0.932659634 | -0.100577417 | 0.783165     | 0.901135424 |
| M1705 | 3-carboxy-4-methyl-5-propyl-2-furanpropanoate (CMPF)            | Lipid                             | Fatty Acid, Dicarboxylate                               | 1.187016728 | 0.247340267  | 0.785216689  | 0.901214609 |
| M1180 | Fibrinopeptide B (1-13)                                         | Peptide                           | Fibrinogen Cleavage Peptide                             | 0.946226689 | -0.079742241 | 0.785189004  | 0.901214609 |
| M1959 | 2-hydroxyheptanoate*                                            | Lipid                             | Fatty Acid, Monohydroxy                                 | 1.076807474 | 0.106760328  | 0.789269054  | 0.902447258 |
| M2037 | 3,4-dihydroxybutyrate                                           | Lipid                             | Fatty Acid, Dihydroxy                                   | 1.032213035 | 0.045740754  | 0.788723124  | 0.902447258 |
| M3131 | sphingomyelin (d18:1/25:0, d19:0/24:1, d20:1/23:0, d19:1/24:0)* | Lipid                             | Sphingomyelins                                          | 1.085838046 | 0.11880804   | 0.788910133  | 0.902447258 |
| M427  | isobutyrylglycine (C4)                                          | Amino Acid                        | Leucine, Isoleucine and Valine Metabolism               | 0.854558465 | -0.226748897 | 0.79138596   | 0.903730952 |
| M1494 | caprate (10:0)                                                  | Lipid                             | Medium Chain Fatty Acid                                 | 1.240244221 | 0.310624235  | 0.794969008  | 0.906683599 |
| M1351 | mannitol/sorbitol                                               | Carbohydrate                      | Fructose, Mannose and Galactose Metabolism              | 1.108691049 | 0.148857396  | 0.799116682  | 0.91027201  |
| M4597 | 1,7-dimethylurate                                               | Xenobiotics                       | Xanthine Metabolism                                     | 1.15224732  | 0.204450412  | 0.802140456  | 0.910294225 |
| M2618 | 1-linolenoyl-GPC (18:3)*                                        | Lipid                             | Lyso phospholipid                                       | 0.869402466 | -0.201903907 | 0.800962968  | 0.910294225 |
| M190  | phenol sulfate                                                  | Amino Acid                        | Tyrosine Metabolism                                     | 1.254629444 | 0.327661326  | 0.801557303  | 0.910294225 |
| M3454 | glycocholate                                                    | Lipid                             | Primary Bile Acid Metabolism                            | 1.335039217 | 0.416882122  | 0.805612514  | 0.913094482 |
| M1980 | 3-hydroxyoctanoate                                              | Lipid                             | Fatty Acid, Monohydroxy                                 | 0.916830708 | -0.125272729 | 0.808610558  | 0.914212683 |
| M3224 | campesterol                                                     | Lipid                             | Sterol                                                  | 0.884906827 | -0.176402535 | 0.80808741   | 0.914212683 |
| M2014 | 13-HODE + 9-HODE                                                | Lipid                             | Fatty Acid, Monohydroxy                                 | 0.914738474 | -0.128568762 | 0.820973059  | 0.925886489 |
| M424  | alpha-hydroxyisovalerate                                        | Amino Acid                        | Leucine, Isoleucine and Valine Metabolism               | 0.931216717 | -0.102811317 | 0.820720577  | 0.925886489 |
| M175  | 4-hydroxyphenylpyruvate                                         | Amino Acid                        | Tyrosine Metabolism                                     | 0.943088956 | -0.084534236 | 0.823817264  | 0.927942866 |
| M1879 | 3-decenoyl carnitine                                            | Xenobiotics                       | Fatty Acid Metabolism (Acyl Carnitine, Monounsaturated) | 0.892156381 | -0.164631481 | 0.827574203  | 0.931020978 |
| M4593 | theophylline                                                    | Xenobiotics                       | Xanthine Metabolism                                     | 1.116238263 | 0.158645005  | 0.83232255   | 0.935205436 |
| M3221 | beta-sitosterol                                                 | Lipid                             | Sterol                                                  | 1.128541199 | 0.174459088  | 0.835718233  |             |

|       |                                                     |                        |                                                         |             |              |             |             |
|-------|-----------------------------------------------------|------------------------|---------------------------------------------------------|-------------|--------------|-------------|-------------|
| M76   | N-acetyl-1-methylhistidine*                         | Amino Acid             | Histidine Metabolism                                    | 0.913638914 | -0.130303995 | 0.847372275 | 0.941035295 |
| M1441 | aconitate [cis or trans]                            | Energy                 | TCA Cycle                                               | 0.97162354  | -0.041530652 | 0.849390279 | 0.941576016 |
| M3047 | ceramide (d18:1/14:0, d16:1/16:0)*                  | Lipid                  | Ceramides                                               | 1.054047148 | 0.075939401  | 0.850422343 | 0.941576016 |
| M1985 | 3-hydroxylaurate                                    | Lipid                  | Fatty Acid, Monohydroxy                                 | 0.912259338 | -0.132484081 | 0.853593073 | 0.942130933 |
| M163  | N-acetyltyrosine                                    | Amino Acid             | Tyrosine Metabolism                                     | 0.925941062 | -0.111007729 | 0.854042927 | 0.942130933 |
| M3120 | sphingomyelin (d18:1/19:0, d19:1/18:0)*             | Lipid                  | Sphingomyelins                                          | 0.969441112 | -0.04477483  | 0.855069328 | 0.942130933 |
| M3455 | taurocholate                                        | Lipid                  | Primary Bile Acid Metabolism                            | 1.240920422 | 0.311410601  | 0.85492021  | 0.942130933 |
| M2322 | 1-stearoyl-2-oleoyl-GPC (18:0/18:1)                 | Lipid                  | Phosphatidylcholine (PC)                                | 1.03312787  | 0.047018827  | 0.86340111  | 0.950159333 |
| M3101 | sphingomyelin (d18:0/18:0, d19:0/17:0)*             | Lipid                  | Dihydrosphingomyelins                                   | 0.942626949 | -0.085241167 | 0.866336544 | 0.952326903 |
| M582  | 2-hydroxybutyrate/2-hydroxyisobutyrate              | Amino Acid             | Glutathione Metabolism                                  | 0.933286    | -0.099608841 | 0.870161861 | 0.955099094 |
| M1880 | cis-4-decenoylcarnitine (C10:1)                     | Lipid                  | Fatty Acid Metabolism (Acyl Carnitine, Monounsaturated) | 0.93846862  | -0.091619589 | 0.871041968 | 0.955099094 |
| M79   | cis-urocanate                                       | Amino Acid             | Histidine Metabolism                                    | 0.902432344 | -0.148109318 | 0.873393597 | 0.955372779 |
| M1703 | eicosenedioate (C20:1-DC)*                          | Lipid                  | Fatty Acid, Dicarboxylate                               | 1.034320414 | 0.046683176  | 0.875252507 | 0.955372779 |
| M2536 | 1-palmitoyl-2-linoleoyl-GPI (16:0/18:2)             | Lipid                  | Phosphatidylinositol (PI)                               | 0.985681356 | -0.020803757 | 0.879717199 | 0.955486335 |
| M4470 | 4-hydroxypurinate                                   | Xenobiotics            | Benzoate Metabolism                                     | 0.973794275 | -0.038311076 | 0.876147658 | 0.955486335 |
| M4431 | carotene diol (1)                                   | Cofactors and Vitamins | Vitamin A Metabolism                                    | 0.955286129 | -0.065995178 | 0.87955566  | 0.955486335 |
| M3043 | N-palmitoyl-heptadecaspingosine (d17:1/16:0)*       | Lipid                  | Ceramides                                               | 0.971112301 | -0.042289954 | 0.879697491 | 0.955486335 |
| M402  | tigloylglycine                                      | Amino Acid             | Leucine, Isoleucine and Valine Metabolism               | 0.9604644   | -0.058195955 | 0.879804249 | 0.955486335 |
| M5249 | 2-acetamidophenol sulfate                           | Xenobiotics            | Food Component/Plant                                    | 0.921413542 | -0.118079293 | 0.877325014 | 0.955486335 |
| M1986 | 3-hydroxymyristate                                  | Lipid                  | Fatty Acid, Monohydroxy                                 | 0.933639089 | -0.09906313  | 0.884110156 | 0.955741101 |
| M1489 | caproate (6:0)                                      | Lipid                  | Medium Chain Fatty Acid                                 | 1.057190107 | 0.080234829  | 0.883629657 | 0.955741101 |
| M528  | creatine                                            | Amino Acid             | Creatine Metabolism                                     | 0.926638524 | -0.109921433 | 0.882987705 | 0.955741101 |
| M3104 | hydroxypalmitoyl sphingomyelin (d18:1/16:0(OH))     | Lipid                  | Sphingomyelins                                          | 0.977033754 | -0.03351969  | 0.884244517 | 0.955741101 |
| M4933 | homotachydrine*                                     | Xenobiotics            | Food Component/Plant                                    | 0.920302635 | -0.119819736 | 0.886008088 | 0.956510697 |
| M343  | 4-methyl-2-oxopentanoate                            | Amino Acid             | Leucine, Isoleucine and Valine Metabolism               | 1.03330431  | 0.047265192  | 0.888284795 | 0.956695354 |
| M4348 | ascorbic acid 2-sulfate                             | Cofactors and Vitamins | Ascorbate and Aldarate Metabolism                       | 1.025412379 | 0.03620422   | 0.888000776 | 0.956695354 |
| M5328 | N-methylpiccolate                                   | Xenobiotics            | Bacterial/Fungal                                        | 0.929684674 | -0.105186622 | 0.889426893 | 0.95679177  |
| M23   | O-acetylhomoserine                                  | Amino Acid             | Glycine, Serine and Threonine Metabolism                | 1.132209852 | 0.179141383  | 0.890544456 | 0.956861596 |
| M3342 | epiandrosterone sulfate                             | Lipid                  | Androgenic Steroids                                     | 0.921885988 | -0.117339755 | 0.892801091 | 0.958153709 |
| M4408 | bilirubin                                           | Cofactors and Vitamins | Hemoglobin and Porphyrin Metabolism                     | 1.048739419 | 0.068656255  | 0.894318913 | 0.958650816 |
| M395  | 2-hydroxy-3-methylvalerate                          | Amino Acid             | Leucine, Isoleucine and Valine Metabolism               | 1.093224449 | 0.12858963   | 0.898874417 | 0.960243902 |
| M3472 | glycochenodeoxycholate glucuronide (1)              | Lipid                  | Primary Bile Acid Metabolism                            | 0.946628456 | -0.079129804 | 0.898726087 | 0.960243902 |
| M1694 | tetradecadienedioate (C14:2-DC)*                    | Lipid                  | Fatty Acid, Dicarboxylate                               | 1.070876378 | 0.098791945  | 0.898974214 | 0.960243902 |
| M1702 | eicosanedioate (C20-DC)                             | Lipid                  | Fatty Acid, Dicarboxylate                               | 1.08073108  | 0.112007579  | 0.91116578  | 0.972124054 |
| M3350 | androsterone sulfate                                | Lipid                  | Androgenic Steroids                                     | 1.066779846 | 0.093262475  | 0.915276712 | 0.972135136 |
| M4963 | methyl indole-3-acetate                             | Xenobiotics            | Food Component/Plant                                    | 1.100918199 | 0.138707277  | 0.913418128 | 0.972135136 |
| M1884 | myristoleylcarnitine (C14:1)*                       | Lipid                  | Fatty Acid Metabolism (Acyl Carnitine, Monounsaturated) | 0.944371846 | -0.082573063 | 0.915453599 | 0.972135136 |
| M3123 | sphingomyelin (d18:1/20:2, d18:2/20:1, d16:1/22:2)* | Lipid                  | Sphingomyelins                                          | 0.95999198  | -0.058905741 | 0.913192577 | 0.972135136 |
| M532  | N-acetylputrescine                                  | Amino Acid             | Polyamine Metabolism                                    | 0.970724841 | -0.042865684 | 0.918932253 | 0.974690103 |
| M5088 | 4-allylphenol sulfate                               | Xenobiotics            | Food Component/Plant                                    | 0.917947493 | -0.123516462 | 0.922479327 | 0.97635776  |
| M4462 | hippurate                                           | Xenobiotics            | Benzoate Metabolism                                     | 1.074890464 | 0.104189651  | 0.922652713 | 0.97635776  |
| M3297 | corticosterone                                      | Lipid                  | Corticosteroids                                         | 1.041305434 | 0.0583933    | 0.924754091 | 0.977443568 |
| M4780 | 2-isopropylmalate                                   | Xenobiotics            | Food Component/Plant                                    | 0.936299201 | -0.094958469 | 0.92873579  | 0.977795189 |
| M1938 | 3-hydroxybutyrate (BHBA)                            | Lipid                  | Ketone Bodies                                           | 0.938322328 | -0.091844499 | 0.929022294 | 0.977795189 |
| M3048 | ceramide (d18:1/17:0, d17:1/18:0)*                  | Lipid                  | Ceramides                                               | 1.011506668 | 0.01650583   | 0.930710127 | 0.977795189 |
| M1696 | hexadecenedioate (C16:1-DC)*                        | Lipid                  | Fatty Acid, Dicarboxylate                               | 0.963879345 | -0.053075529 | 0.930562976 | 0.977795189 |
| M307  | indoleacetylglutamine                               | Amino Acid             | Tryptophan Metabolism                                   | 0.926276439 | -0.110485278 | 0.928071896 | 0.977795189 |
| M1772 | propionylglycine (C3)                               | Lipid                  | Fatty Acid Metabolism (also BCAA Metabolism)            | 0.933481383 | -0.099306845 | 0.932616533 | 0.977795189 |
| M201  | vanillactate                                        | Amino Acid             | Tyrosine Metabolism                                     | 1.022216814 | 0.031701227  | 0.932067717 | 0.977795189 |
| M1679 | azelate (C9-DC)                                     | Lipid                  | Fatty Acid, Dicarboxylate                               | 1.048304826 | 0.068058285  | 0.933697214 | 0.977800423 |
| M1861 | laurylcarnitine (C12)                               | Lipid                  | Fatty Acid Metabolism (Acyl Carnitine, Medium Chain)    | 0.973162873 | -0.039246814 | 0.935893646 | 0.977847499 |
| M6086 | sulfate*                                            | Xenobiotics            | Chemical                                                | 0.982423931 | -0.025582391 | 0.935348577 | 0.977847499 |
| M1882 | 5-dodecenoylcarnitine (C12:1)                       | Lipid                  | Fatty Acid Metabolism (Acyl Carnitine, Monounsaturated) | 0.96330263  | -0.053938991 | 0.941463364 | 0.980700059 |
| M4409 | bilirubin (E,E)*                                    | Cofactors and Vitamins | Hemoglobin and Porphyrin Metabolism                     | 0.966662612 | -0.048915652 | 0.941860452 | 0.980700059 |
| M2931 | linoleoyl-linoleoyl-glycerol (18:2/18:2) [1]*       | Lipid                  | Diacylglycerol                                          | 0.977709947 | -0.032521564 | 0.940889986 | 0.980700059 |
| M81   | forminoglutamate                                    | Amino Acid             | Histidine Metabolism                                    | 0.106093101 | 0.023032597  | 0.94478668  | 0.982621386 |
| M3193 | cholesterol sulfate                                 | Lipid                  | Sterol                                                  | 1.01156186  | 0.016584547  | 0.947502087 | 0.9836174   |
| M267  | kyurenine                                           | Amino Acid             | Tryptophan Metabolism                                   | 0.970766332 | -0.042804021 | 0.947908517 | 0.9836174   |
| M1814 | cis-3,4-methyleneheptanoylglycine                   | Lipid                  | Fatty Acid Metabolism (Acyl Glycine)                    | 1.018557502 | 0.026527429  | 0.955155276 | 0.987754433 |
| M3009 | N-palmitoyl-sphinganine (d18:0/16:0)                | Lipid                  | Dihydroceramides                                        | 0.978772258 | -0.03228208  | 0.954406016 | 0.987754433 |
| M3127 | sphingomyelin (d18:1/22:2, d18:2/22:1, d16:1/24:2)* | Lipid                  | Sphingomyelins                                          | 0.99165215  | -0.012093952 | 0.953648601 | 0.987754433 |
| M3115 | sphingomyelin (d17:1/16:0, d18:1/15:0, d16:1/17:0)* | Lipid                  | Sphingomyelins                                          | 1.007106928 | 0.010216867  | 0.958346679 | 0.989928558 |
| M2848 | 1-myristoylglycerol (14:0)                          | Lipid                  | Plasmalogen                                             | 1.008608687 | 0.012366556  | 0.962028872 | 0.992028147 |
| M1979 | 3-hydroxyhexanoate                                  | Lipid                  | Monooacylglycerol                                       | 0.964713131 | -0.051828091 | 0.969110005 | 0.992028147 |
| M577  | cysteinylglycine disulfide*                         | Amino Acid             | Fatty Acid, Monohydroxy                                 | 0.984393334 | -0.022693207 | 0.967004561 | 0.992028147 |
| M4437 | retinal                                             | Amino Acid             | Glutathione Metabolism                                  | 0.989731429 | -0.014891003 | 0.965285777 | 0.992028147 |
| M1691 | tetradecanedioate (C14)                             | Cofactors and Vitamins | Vitamin A Metabolism                                    | 1.02905606  | 0.041321578  | 0.965784369 | 0.992028147 |
| M5738 | diphenylate                                         | Lipid                  | Fatty Acid, Dicarboxylate                               | 0.986974171 | -0.018915764 | 0.962743749 | 0.992028147 |
| M5218 | vanillic acid glycine                               | Xenobiotics            | Drug - Gastrointestinal                                 | 1.0000001   | 1.44E-07     | 0.968305865 | 0.992028147 |
| M2010 | 16-hydroxypalmitate                                 | Xenobiotics            | Food Component/Plant                                    | 0.962131327 | -0.055694265 | 0.968315326 | 0.992028147 |
| M322  | 3-indoxyl sulfate                                   | Lipid                  | Fatty Acid, Monohydroxy                                 | 0.105424825 | 0.022083436  | 0.972359781 | 0.993118024 |
| M1372 | galactonate                                         | Amino Acid             | Tryptophan Metabolism                                   | 0.993907188 | -0.008816957 | 0.971918595 | 0.993118024 |
| M180  | 4-hydroxyphenylacetoylcarnitine                     | Carbohydrate           | Fructose, Mannose and Galactose Metabolism              | 1.022781658 | 0.032498194  | 0.975787417 | 0.995500294 |
| M3280 | Salpha-pregnan-3beta,20alpha-diol disulfate         | Amino Acid             | Tyrosine Metabolism                                     | 1.017744441 | 0.025375342  | 0.978194831 | 0.995682851 |
| M2    | N-acetyltyrosine                                    | Lipid                  | Progestin Steroids                                      | 0.984364033 | -0.02273615  | 0.979252441 | 0.995682851 |
| M151  | phenyllactate (PLA)                                 | Amino Acid             | Glycine, Serine and Threonine Metabolism                | 0.988710608 | -0.016379784 | 0.977131609 | 0.995682851 |
| M1682 | decadienedioic acid (C10:2-DC)                      | Lipid                  | Fatty Acid, Dicarboxylate                               | 0.99047638  | -0.013805524 | 0.981083956 | 0.99643052  |
| M1709 | 2-hydroxysebacate                                   | Lipid                  | Fatty Acid, Dicarboxylate                               | 1.008288648 | 0.011908706  | 0.983374859 | 0.997642574 |
| M5073 | tartrate                                            | Xenobiotics            | Food Component/Plant                                    | 1.010447171 | 0.014993895  | 0.985598609 | 0.998697003 |
| M2360 | 1-linoleoyl-2-linolenoyl-GPC (18:2/18:3)*           | Lipid                  | Phosphatidylcholine (PC)                                | 0.981567617 | -0.026840041 | 0.986611561 | 0.998697003 |
| M6175 | 2-naphthol sulfate                                  | Xenobiotics            | Chemical                                                | 0.99716406  | -0.004097208 | 0.994190077 | 0.999110486 |
| M4382 | gamma-tocopherol/beta-tocopherol                    | Cofactors and Vitamins | Tocopherol Metabolism                                   | 1.001293242 | 0.001864548  | 0.99758319  | 0.999110486 |
| M3540 | glycodeoxycholate 3-sulfate                         | Lipid                  | Secondary Bile Acid Metabolism                          | 0.998575532 | -0.002056537 | 0.99727119  | 0.999110486 |
| M351  | isovalerate (C5)                                    | Lipid                  | Leucine, Isoleucine and Valine Metabolism               | 0.997974705 | -0.002924845 | 0.998011354 | 0.999110486 |
| M410  | methylsuccinate                                     | Amino Acid             | Leucine, Isoleucine and Valine Metabolism               | 0.998867107 | -0.001635346 | 0.996624777 | 0.999110486 |
| M110  | N2-acetyl,N6,N6-dimethyllysine                      | Amino Acid             | Leucine, Isoleucine and Valine Metabolism               | 1.00696369  | 0.010011662  | 0.99046352  | 0.999110486 |
| M4209 | orotidine                                           | Amino Acid             | Lysine Metabolism                                       | 0.996361644 | -0.00525861  | 0.993955286 | 0.999110486 |
| M1239 | pyruvate                                            | Nucleotide             | Pyrimidine Metabolism, Orotate containing               | 0.99134111  | -0.012546536 | 0.989754736 | 0.999110486 |
| M3504 | ursodeoxycholate                                    | Carbohydrate           | Glycolysis, Gluconeogenesis, and Pyruvate Metabolism    | 1.002149566 | 0.003097839  | 0.991332105 | 0.999110486 |
| M510  | N2,N5-diacetylornithine                             | Lipid                  | Secondary Bile Acid Metabolism                          | 0.995348987 | -0.006725646 | 0.993737204 | 0.999110486 |
|       |                                                     | Amino Acid             | Urea cycle; Arginine and Proline Metabolism             | 0.99996451  | -5.12E-05    | 0.999737557 | 0.999737557 |

Supplementary data 3: UPLC-MS/MS metabolites in serum samples collected after the first NF

Compounds in column B for which no authentic standards were available for confirmation are marked with \* after the compound name to designate these as Metabolomics Standards Initiative level 2/3

Fold change and log2 (fold change) were based on samples preceding vs. not preceding NF within 24 hours

p values are from Welch's two-sample t-test. q values are derived from p values after FDR correction for multiple testing

Color coding in column E was applied along the fold change gradient, with blue and red representing decreased and increased levels in NF vs. non-NF samples, respectively

Color coding in column H was applied along the q value gradient, with darker colors indicating more significant values

| metabolite_code | metabolite                                             | pathway                | sub_pathway                                                  | foldchange  | log2_foldchange | p           | q           |
|-----------------|--------------------------------------------------------|------------------------|--------------------------------------------------------------|-------------|-----------------|-------------|-------------|
| M2834           | 1-(1-enyl-palmitoyl)-GPE (P-16:0)*                     | Lipid                  | Lysoplasmalogen                                              | 0.674570614 | -0.567958623    | 2.80E-06    | 0.000926257 |
| M105            | lysine                                                 | Amino Acid             | Lysine Metabolism                                            | 0.739030421 | -0.436294343    | 3.30E-06    | 0.000926257 |
| M17             | threonine                                              | Amino Acid             | Glycine, Serine and Threonine Metabolism                     | 0.647591826 | -0.626843319    | 3.30E-06    | 0.000926257 |
| M4219           | uridine                                                | Nucleotide             | Pyrimidine Metabolism, Uracil containing                     | 0.553579757 | -0.853136906    | 4.08E-06    | 0.000926257 |
| M2838           | 1-(1-enyl-stearoyl)-GPE (P-18:0)*                      | Lipid                  | Lysoplasmalogen                                              | 0.664253797 | -0.590193526    | 6.35E-06    | 0.000964415 |
| M2602           | 1-palmitoleoyl-GPC* (16:1)*                            | Lipid                  | Lysophospholipid                                             | 0.559967027 | -0.836586217    | 8.47E-06    | 0.000964415 |
| M2708           | 1-palmitoyl-GPG (16:0)*                                | Lipid                  | Lysophospholipid                                             | 0.694801454 | -0.52537321     | 9.55E-06    | 0.000964415 |
| M2601           | 2-palmitoyl-GPC* (16:0)*                               | Lipid                  | Lysophospholipid                                             | 0.665299869 | -0.587923344    | 7.29E-06    | 0.000964415 |
| M40             | asparagine                                             | Amino Acid             | Alanine and Aspartate Metabolism                             | 0.771489373 | -0.37428181     | 8.99E-06    | 0.000964415 |
| M2673           | 1-linoleoyl-GPE (18:2)*                                | Lipid                  | Lysophospholipid                                             | 0.564080009 | -0.826028078    | 1.55E-05    | 0.00137539  |
| M2182           | linoleoyl ethanolamide                                 | Lipid                  | Endocannabinoid                                              | 1.638670852 | 0.7125261       | 1.66E-05    | 0.00137539  |
| M2833           | 1-(1-enyl-palmitoyl)-GPC (P-16:0)*                     | Lipid                  | Lysoplasmalogen                                              | 0.574778096 | -0.798923011    | 2.32E-05    | 0.001756445 |
| M121            | fructosyllysine                                        | Amino Acid             | Lysine Metabolism                                            | 0.537594731 | -0.895409098    | 3.37E-05    | 0.002203594 |
| M527            | guanidinoacetate                                       | Amino Acid             | Creatine Metabolism                                          | 0.389657786 | -1.359720451    | 3.39E-05    | 0.002203594 |
| M2616           | 1-linoleoyl-GPC (18:2)                                 | Lipid                  | Lysophospholipid                                             | 0.678062534 | -0.560509762    | 4.74E-05    | 0.002595294 |
| M2600           | 1-palmitoyl-GPC (16:0)                                 | Lipid                  | Lysophospholipid                                             | 0.73458052  | -0.445007457    | 5.02E-05    | 0.002595294 |
| M2603           | 2-palmitoleoyl-GPC* (16:1)*                            | Lipid                  | Lysophospholipid                                             | 0.550595589 | -0.860935043    | 5.14E-05    | 0.002595294 |
| M3315           | cortisone                                              | Lipid                  | Corticosteroids                                              | 1.426473135 | 0.512452577     | 5.02E-05    | 0.002595294 |
| M644            | gamma-glutamylthreonine                                | Peptide                | Gamma-glutamyl Amino Acid                                    | 0.652597953 | -0.615733633    | 5.75E-05    | 0.002752093 |
| M2613           | 1-oleoyl-GPC (18:1)                                    | Lipid                  | Lysophospholipid                                             | 0.734039008 | -0.446071362    | 6.06E-05    | 0.002754743 |
| M2618           | 1-linolenoyl-GPC (18:3)*                               | Lipid                  | Lysophospholipid                                             | 0.560851663 | -0.834308846    | 6.52E-05    | 0.002820838 |
| M2236           | glycerophosphorylcholine (GPC)                         | Lipid                  | Phospholipid Metabolism                                      | 0.751602647 | -0.411957946    | 6.94E-05    | 0.002866052 |
| M2365           | 1-linoleoyl-2-arachidonoyl-GPC (18:2/20:4n6)*          | Lipid                  | Phosphatidylcholine (PC)                                     | 0.693454813 | -0.528126218    | 7.59E-05    | 0.002976928 |
| M5382           | 3-(cystein-5-yl)acetaminophen*                         | Xenobiotics            | Drug - Analgesics, Anesthetics                               | 4.086393608 | 2.03082174      | 7.86E-05    | 0.002976928 |
| M640            | gamma-glutamyl-alpha-lysine                            | Peptide                | Gamma-glutamyl Amino Acid                                    | 0.642814627 | -0.637525337    | 9.18E-05    | 0.003254768 |
| M2240           | glycerophosphoethanolamine                             | Lipid                  | Phospholipid Metabolism                                      | 0.773138269 | -0.371201644    | 9.31E-05    | 0.003254768 |
| M649            | gamma-glutamylcitrulline*                              | Peptide                | Gamma-glutamyl Amino Acid                                    | 0.575940624 | -0.796008008    | 0.000109415 | 0.003683629 |
| M2649           | 1-lignoceryl-GPC (24:0)                                | Lipid                  | Lysophospholipid                                             | 0.490870428 | -1.026585839    | 0.000119549 | 0.003881086 |
| M2801           | 1-(1-enyl-palmitoyl)-2-linoleoyl-GPE (P-16:0/18:2)*    | Lipid                  | Plasmalogen                                                  | 0.63790632  | -0.648583522    | 0.000147733 | 0.004619947 |
| M4429           | retinol (Vitamin A)                                    | Cofactors and Vitamins | Vitamin A Metabolism                                         | 0.630618033 | -0.66516167     | 0.000153738 | 0.004619947 |
| M5117           | pyrraline                                              | Xenobiotics            | Food Component/Plant                                         | 0.389183072 | -1.361479136    | 0.000157556 | 0.004619947 |
| M2359           | 1,2-dilinoeloyl-GPC (18:2/18:2)                        | Lipid                  | Phosphatidylcholine (PC)                                     | 0.690110004 | -0.535101748    | 0.000170644 | 0.004847357 |
| M2686           | 1-arachidonoyl-GPE (20:4n6)*                           | Lipid                  | Lysophospholipid                                             | 0.723317555 | -0.467298928    | 0.000191734 | 0.005163072 |
| M492            | citrulline                                             | Amino Acid             | Urea cycle; Arginine and Proline Metabolism                  | 0.707084124 | -0.500046228    | 0.000193118 | 0.005163072 |
| M2611           | 1-stearoyl-GPC (18:0)                                  | Lipid                  | Lysophospholipid                                             | 0.730501297 | -0.45304126     | 0.000223368 | 0.005801179 |
| M2635           | 1-arachidonoyl-GPC* (20:4)*                            | Lipid                  | Lysophospholipid                                             | 0.727375151 | -0.466433958    | 0.000233443 | 0.005894437 |
| M48             | N-acetylglutamine                                      | Amino Acid             | Glutamate Metabolism                                         | 0.534600534 | -0.903466815    | 0.000299242 | 0.007351657 |
| M1352           | mannose                                                | Carbohydrate           | Fructose, Mannose and Galactose Metabolism                   | 1.348511635 | 0.43136797      | 0.000361539 | 0.008648401 |
| M29             | alanine                                                | Amino Acid             | Alanine and Aspartate Metabolism                             | 0.793005933 | -0.334596435    | 0.000387502 | 0.009031774 |
| M45             | glutamine                                              | Amino Acid             | Glutamate Metabolism                                         | 0.816474119 | -0.29252094     | 0.000404343 | 0.009188699 |
| M2804           | 1-(1-enyl-palmitoyl)-2-arachidonoyl-GPE (P-16:0/20:4)* | Lipid                  | Plasmalogen                                                  | 0.733919114 | -0.446307024    | 0.000569949 | 0.012520761 |
| M6261           | diethyl sulfoxuccinate                                 | Xenobiotics            | Chemical                                                     | 0.318497052 | -1.650648074    | 0.000578517 | 0.012520761 |
| M2836           | 1-(1-enyl-oleoyl)-GPE (P-18:1)*                        | Lipid                  | Lysoplasmalogen                                              | 0.708944032 | -0.496256358    | 0.00059414  | 0.012559852 |
| M2810           | 1-(1-enyl-stearoyl)-2-linoleoyl-GPE (P-18:0/18:2)*     | Lipid                  | Plasmalogen                                                  | 0.696596576 | -0.521604713    | 0.000673343 | 0.013305852 |
| M1890           | ximenocarnitine (C26:1)*                               | Lipid                  | Fatty Acid Metabolism (Acyl Carnitine, Monounsaturated)      | 0.574326438 | -0.800057121    | 0.000650194 | 0.013305852 |
| M429            | 2,3-dihydroxy-2-methylbutyrate                         | Amino Acid             | Leucine, Isoleucine and Valine Metabolism                    | 0.267384258 | -1.903013562    | 0.00066819  | 0.013305852 |
| M438            | 5-methylmethionine                                     | Amino Acid             | Methionine, Cysteine, SAM and Taurine Metabolism             | 0.170517087 | -2.552011779    | 0.000714097 | 0.013810933 |
| M2198           | N-palmitoylserine                                      | Lipid                  | Endocannabinoid                                              | 0.603863572 | -0.72770545     | 0.000863168 | 0.016346238 |
| M493            | homoarginine                                           | Amino Acid             | Urea cycle; Arginine and Proline Metabolism                  | 0.564771033 | -0.82462        | 0.000901773 | 0.016394228 |
| M2197           | N-stearoylserine*                                      | Lipid                  | Endocannabinoid                                              | 0.737056005 | -0.440153849    | 0.000886665 | 0.016394228 |
| M2671           | 1-oleoyl-GPE (18:1)                                    | Lipid                  | Lysophospholipid                                             | 0.715371134 | -0.483236189    | 0.000951391 | 0.016738645 |
| M5376           | 3-(N-acetyl-L-cystein-5-yl) acetaminophen              | Xenobiotics            | Drug - Analgesics, Anesthetics                               | 2.903140527 | 1.537614408     | 0.000975961 | 0.016738645 |
| M70             | histidine                                              | Amino Acid             | Histidine Metabolism                                         | 0.755208032 | -0.405053987    | 0.000959488 | 0.016738645 |
| M635            | gamma-glutamylglutamine                                | Peptide                | Gamma-glutamyl Amino Acid                                    | 0.781114552 | -0.356393958    | 0.001054506 | 0.017750844 |
| M5379           | 2-hydroxyacetaminophen sulfate*                        | Xenobiotics            | Drug - Analgesics, Anesthetics                               | 2.334978885 | 1.223409504     | 0.001145559 | 0.018273135 |
| M224            | dopamine 3-O-sulfate                                   | Amino Acid             | Tyrosine Metabolism                                          | 0.559758242 | -0.837124229    | 0.001115389 | 0.018273135 |
| M2159           | oleoyl ethanolamide                                    | Lipid                  | Endocannabinoid                                              | 1.430964098 | 0.516987477     | 0.001165943 | 0.018273135 |
| M6086           | sulfate*                                               | Xenobiotics            | Chemical                                                     | 0.835634489 | -0.259056056    | 0.001148791 | 0.018273135 |
| M307            | indoleacetylglutamine                                  | Amino Acid             | Tryptophan Metabolism                                        | 0.531758184 | -0.911157764    | 0.001295922 | 0.019665987 |
| M92             | 1-methyl-5-imidazoleacetate                            | Amino Acid             | Histidine Metabolism                                         | 0.470772471 | -1.086898134    | 0.001832313 | 0.02772986  |
| M5380           | 2-methoxyacetaminophen sulfate*                        | Xenobiotics            | Drug - Analgesics, Anesthetics                               | 4.147240277 | 2.061680848     | 0.00186086  | 0.02772986  |
| M279            | 8-methoxylkynurenate                                   | Amino Acid             | Tryptophan Metabolism                                        | 0.467029591 | -1.098414133    | 0.001891915 | 0.027739717 |
| M2809           | 1-(1-enyl-stearoyl)-2-oleoyl-GPE (P-18:0/18:1)         | Lipid                  | Plasmalogen                                                  | 0.776873971 | -0.36424759     | 0.00200203  | 0.02886255  |
| M3078           | glycosyl ceramide (d18:1/20:0, d16:1/22:0)*            | Lipid                  | Hexosylceramides (HCER)                                      | 0.710870667 | -0.49234009     | 0.002032127 | 0.02886255  |
| M632            | gamma-glutamylalanine                                  | Peptide                | Gamma-glutamyl Amino Acid                                    | 0.667243227 | -0.583715338    | 0.002127191 | 0.029747954 |
| M2818           | 1-(1-enyl-stearoyl)-2-arachidonoyl-GPE (P-18:0/20:4)*  | Lipid                  | Plasmalogen                                                  | 0.729790736 | -0.454445258    | 0.002240155 | 0.030392549 |
| M3108           | lignoceryl sphingomyelin (d18:1/24:0)                  | Lipid                  | Sphingomyelins                                               | 0.830073968 | -0.268688194    | 0.002235575 | 0.030392549 |
| M223            | dopamine 4-sulfate                                     | Amino Acid             | Tyrosine Metabolism                                          | 0.422763562 | -1.242077058    | 0.002607033 | 0.0348499   |
| M2034           | 2R,3R-dihydroxybutyrate                                | Lipid                  | Fatty Acid, Dihydroxy                                        | 0.726729879 | -0.460508872    | 0.002823859 | 0.037201274 |
| M495            | proline                                                | Amino Acid             | Urea cycle; Arginine and Proline Metabolism                  | 0.795923615 | -0.329298114    | 0.002930661 | 0.038056725 |
| M1894           | arachidonoylcarnitine (C20:4)                          | Lipid                  | Fatty Acid Metabolism (Acyl Carnitine, Polyunsaturated)      | 0.697114327 | -0.520532817    | 0.003077328 | 0.03885127  |
| M3261           | pregnenetriol sulfate*                                 | Lipid                  | Pregnenolone Steroids                                        | 1.718784438 | 0.78138862      | 0.003067143 | 0.03885127  |
| M1870           | cerotylcarnitine (C26)*                                | Lipid                  | Fatty Acid Metabolism (Acyl Carnitine, Long Chain Saturated) | 0.662192481 | -0.594677466    | 0.003142247 | 0.039127426 |
| M4220           | uracil                                                 | Nucleotide             | Pyrimidine Metabolism, Uracil containing                     | 0.474032012 | -1.076943606    | 0.003274585 | 0.040224295 |
| M454            | alpha-ketobutyrate                                     | Amino Acid             | Methionine, Cysteine, SAM and Taurine Metabolism             | 1.538325348 | 0.621360658     | 0.003327998 | 0.040335334 |
| M2010           | 16-hydroxypalmitate                                    | Lipid                  | Fatty Acid, Monohydroxy                                      | 0.784402371 | -0.350334199    | 0.003688279 | 0.043540847 |
| M5585           | dexamethasone                                          | Xenobiotics            | Drug - Antiinflammatory, Immunosuppressant                   | 0.106814657 | -3.226818471    | 0.00368795  | 0.043540847 |
| M5374           | 4-acetamidophenol                                      | Xenobiotics            | Drug - Analgesics, Anesthetics                               | 2.999036562 | 1.584499111     | 0.004057933 | 0.047290523 |
| M5386           | 3-(methylthio)acetaminophen sulfate*                   | Xenobiotics            | Drug - Analgesics, Anesthetics                               | 2.245499911 | 1.167036665     | 0.004193348 | 0.048250039 |
| M93             | 1-methyl-5-imidazoleacetate                            | Amino Acid             | Histidine Metabolism                                         | 0.516401831 | -0.953433978    | 0.004465079 | 0.05036472  |
| M646            | gamma-glutamyltyrosine                                 | Peptide                | Gamma-glutamyl Amino Acid                                    | 0.744412665 | -0.425825494    | 0.004467945 | 0.05036472  |
| M391            | 1-carboxyethylisoleucine                               | Amino Acid             | Leucine, Isoleucine and Valine Metabolism                    | 0.597419767 | -0.743183122    | 0.00460857  | 0.051087682 |
| M504            | N-acetylcitrulline                                     | Amino Acid             | Urea cycle; Arginine and Proline Metabolism                  | 0.356789923 | -1.486853227    | 0.004684619 | 0.051305043 |
| M2888           | diacylglycerol (14:0/18:1, 16:0/16:1) [2]*             | Lipid                  | Diacylglycerol                                               | 0.464335722 | -1.106759821    | 0.004770672 | 0.051625491 |
| M175            | 4-hydroxyphenylpyruvate                                | Amino Acid             | Tyrosine Metabolism                                          | 0.676502254 | -0.563833354    | 0.004871419 | 0.051751958 |
| M3472           | glycochenodeoxycholate glucuronide (1)                 | Lipid                  | Primary Bile Acid Metabolism                                 | 1.796666795 | 0.845322875     | 0.004896225 | 0.051751958 |
| M2556           | 1-stearoyl-2-arachidonoyl-GPI (18:0/20:4)              | Lipid                  | Phosphatidylglycerol (PI)                                    | 0.811106928 | -0.302035978    | 0.00499338  | 0.052234466 |
| M423            | 3-methyl-2-oxobutyrate                                 | Amino Acid             | Leucine, Isoleucine and Valine Metabolism                    | 1.150114968 | 0.201778083     | 0.005103357 | 0.052277236 |
| M1659           | glutarate (C5-DC)                                      | Lipid                  | Fatty Acid, Dicarboxylate                                    | 0.614964967 | -0.701423869    | 0.005118453 | 0.052277236 |
| M4322           | trigonelline (N'-methylnicotinate)                     | Cofactors and Vitamins | Nicotinate and Nicotinamide Metabolism                       | 0.44495491  | -1.168268949    | 0.005272328 | 0.053250512 |
| M5377           | 4-acetaminophen sulfate                                | Xenobiotics            | Drug - Analgesics, Anesthetics                               | 2.415269823 | 1.272184369     | 0.005402865 | 0.053969282 |
| M4502           | 3-methyl catechol sulfate (1)                          | Xenobiotics            | Benzoate Metabolism                                          | 0.188892559 | -2.40436199     | 0.0055      |             |

|       |                                                                     |                                   |                                                              |              |              |             |             |
|-------|---------------------------------------------------------------------|-----------------------------------|--------------------------------------------------------------|--------------|--------------|-------------|-------------|
| M5151 | trans-3,4-methyleneheptanoate                                       | Xenobiotics                       | Food Component/Plant                                         | 1.339605537  | 0.421808244  | 0.00867655  | 0.071736956 |
| M75   | N-acetyl-3-methylhistidine*                                         | Amino Acid                        | Histidine Metabolism                                         | 0.365655191  | -1.45144425  | 0.00873938  | 0.071736956 |
| M5378 | 4-acetamidophenylglucuronide                                        | Xenobiotics                       | Drug - Analgesics, Anesthetics                               | 1.968171563  | 0.976855984  | 0.009074319 | 0.072996067 |
| M4602 | 7-methylxanthine                                                    | Xenobiotics                       | Xanthine Metabolism                                          | 0.463953655  | -1.107947395 | 0.009357168 | 0.073324706 |
| M3102 | sphingomyelin (d18:0/20:0, d16:0/22:0)*                             | Lipid                             | Dihydrosphingomyelins                                        | 0.751472265  | -0.412208236 | 0.009244379 | 0.073324706 |
| M3107 | tricosanoyl sphingomyelin (d18:1/23:0)*                             | Lipid                             | Sphingomyelins                                               | 0.806255887  | -0.310690305 | 0.009331481 | 0.073324706 |
| M2814 | 1-(1-enyl-palmitoyl)-2-linoleoyl-GPC (P-16:0/18:2)*                 | Lipid                             | Plasmalogens                                                 | 0.842460639  | -0.247318811 | 0.009982288 | 0.076897459 |
| M4324 | N1-Methyl-2-pyridone-5-carboxamide                                  | Cofactors and Vitamins            | Nicotinate and Nicotinamide Metabolism                       | 0.651257571  | -0.618699856 | 0.009914035 | 0.076897459 |
| M4231 | 5,6-dihydrouracil                                                   | Nucleotide                        | Pyrimidine Metabolism, Uracil containing                     | 0.481243974  | -1.05515962  | 0.010170155 | 0.077686311 |
| M2266 | 1-myristoyl-2-arachidonoyl-GPC (14:0/20:4)*                         | Lipid                             | Phosphatidylcholine (PC)                                     | 0.670136712  | -0.577472651 | 0.010563159 | 0.077923972 |
| M4603 | 5-acetylamino-6-amino-3-methyluracil                                | Xenobiotics                       | Xanthine Metabolism                                          | 0.402081551  | -1.314439952 | 0.010473618 | 0.077923972 |
| M461  | cysteine s-sulfate                                                  | Amino Acid                        | Methionine, Cysteine, SAM and Taurine Metabolism             | 0.880305084  | -0.183924496 | 0.010409393 | 0.077923972 |
| M6154 | ectoine                                                             | Xenobiotics                       | Chemical                                                     | 0.604223423  | -0.726845982 | 0.010629893 | 0.077923972 |
| M1683 | undecanedioate (C11-DC)                                             | Lipid                             | Fatty Acid, Dicarboxylate                                    | 0.677099237  | -0.562550801 | 0.01038174  | 0.077923972 |
| M2141 | 12-HETE                                                             | Lipid                             | Eicosanoid                                                   | 0.151888052  | -2.719679782 | 0.0118265   | 0.079637501 |
| M2173 | N-stearoyltaurine                                                   | Lipid                             | Endoacmalinoid                                               | 0.707709985  | -0.49876982  | 0.011214082 | 0.079637501 |
| M510  | N2,N5-diacetylornithine                                             | Amino Acid                        | Urea cycle; Arginine and Proline Metabolism                  | 0.660635878  | -0.598072772 | 0.011163911 | 0.079637501 |
| M4353 | threonate                                                           | Cofactors and Vitamins            | Ascorbate and Aldarate Metabolism                            | 0.729437237  | -0.455144245 | 0.010974562 | 0.079637501 |
| M641  | gamma-glutamyl-epsilon-lysine                                       | Peptide                           | Gamma-glutamyl Amino Acid                                    | 0.677111881  | -0.56253386  | 0.011539525 | 0.079707612 |
| M3474 | glycochenodeoxycholate 3-sulfate                                    | Lipid                             | Primary Bile Acid Metabolism                                 | 2.023471508  | 0.1016832535 | 0.011574703 | 0.079707612 |
| M3058 | glycosyl-N-stearoyl-sphingosine (d18:1/18:0)                        | Lipid                             | Hexosylceramides (HCER)                                      | 0.748986015  | -0.416989313 | 0.011504902 | 0.079707612 |
| M131  | picolinate                                                          | Amino Acid                        | Lysine Metabolism                                            | 0.61162252   | -0.709286566 | 0.01148145  | 0.079707612 |
| M263  | oxindolylalanine                                                    | Amino Acid                        | Tryptophan Metabolism                                        | 0.730511179  | -0.453021745 | 0.01217269  | 0.083195302 |
| M2715 | 1-linoleoyl-GPG (18:2)*                                             | Lipid                             | Lyso phospholipid                                            | 0.820121631  | -0.286092005 | 0.012399502 | 0.084113042 |
| M228  | vanillic alcohol sulfate                                            | Amino Acid                        | Tyrosine Metabolism                                          | 0.172888449  | -2.532086616 | 0.012981422 | 0.087408245 |
| M4594 | 1-methylurate                                                       | Xenobiotics                       | Xanthine Metabolism                                          | 0.493191116  | -1.019781282 | 0.013440272 | 0.088911378 |
| M58   | carboxethyl-GABA                                                    | Amino Acid                        | Glutamate Metabolism                                         | 0.781943279  | -0.354864134 | 0.013498097 | 0.088911378 |
| M505  | N-acetylproline                                                     | Amino Acid                        | Urea cycle; Arginine and Proline Metabolism                  | 0.70816973   | -0.497832917 | 0.01339677  | 0.088911378 |
| M637  | gamma-glutamylhistidine                                             | Peptide                           | Gamma-glutamyl Amino Acid                                    | 0.749491627  | -0.416015735 | 0.013907935 | 0.08949881  |
| M3068 | glycosyl-N-behenoyl-sphingadine (d18:2/22:0)*                       | Lipid                             | Lysylceramides (HCER)                                        | 0.751046615  | -0.413025641 | 0.013937629 | 0.08949881  |
| M499  | N-acetylarginine                                                    | Amino Acid                        | Urea cycle; Arginine and Proline Metabolism                  | 0.680719305  | -0.55486807  | 0.014035955 | 0.08949881  |
| M42   | N-acetylaspargine                                                   | Amino Acid                        | Alanine and Aspartate Metabolism                             | 0.725543016  | -0.462866943 | 0.013754922 | 0.08949881  |
| M72   | 3-methylhistidine                                                   | Amino Acid                        | Histidine Metabolism                                         | 0.554988951  | -0.849469046 | 0.014468214 | 0.091969279 |
| M447  | 5-methylthioribose                                                  | Amino Acid                        | Methionine, Cysteine, SAM and Taurine Metabolism             | 1.16179982   | 0.216365111  | 0.014605157 | 0.092195052 |
| M1165 | DSGEGDFAEGGGVR*                                                     | Peptide                           | Fibrinogen Cleavage Peptide                                  | 1.34284999   | 0.425298151  | 0.014756253 | 0.092500649 |
| M4133 | allantoin                                                           | Nucleotide                        | Purine Metabolism, (Hypo)Xanthine/Inosine containing         | 0.564206101  | -0.825705829 | 0.014992926 | 0.092921996 |
| M4817 | N-acetyllain                                                        | Xenobiotics                       | Food Component/Plant                                         | 0.273509775  | -1.870335703 | 0.01502699  | 0.092921996 |
| M6435 | GlcNAc sulfate conjugate of C21H34O2 steroid                        | Partially Characterized Molecules | Partially Characterized Molecules                            | 2.087127313  | 1.061518607  | 0.015144827 | 0.09301789  |
| M2360 | 1-linoleoyl-2-linoleinoyl-GPC (18:2/18:3)*                          | Lipid                             | Phosphatidylcholine (PC)                                     | 0.7082254544 | -0.230831117 | 0.015683381 | 0.094541631 |
| M4816 | alliin                                                              | Xenobiotics                       | Food Component/Plant                                         | 0.318666666  | -1.652198942 | 0.015704935 | 0.094541631 |
| M576  | cysteinylglycine                                                    | Amino Acid                        | Glutathione Metabolism                                       | 1.503328124  | 0.588159933  | 0.015599457 | 0.094541631 |
| M1240 | lactate                                                             | Carbohydrate                      | Glycolysis, Gluconeogenesis, and Pyruvate Metabolism         | 0.851025967  | -0.232724941 | 0.016215065 | 0.096970358 |
| M4601 | 3-methylxanthine                                                    | Xenobiotics                       | Xanthine Metabolism                                          | 0.436791777  | -1.194982397 | 0.016941284 | 0.09951609  |
| M1494 | caprate (10:0)                                                      | Lipid                             | Medium Chain Fatty Acid                                      | 0.730198512  | -0.453639366 | 0.01696919  | 0.09951609  |
| M1880 | cis-4-decenoylcarnitine (C10:1)                                     | Lipid                             | Fatty Acid Metabolism (Acyl Carnitine, Monounsaturated)      | 1.569841486  | 0.650618891  | 0.016798122 | 0.09951609  |
| M1462 | citronate/glutaconate                                               | Energy                            | TCA Cycle                                                    | 0.626495277  | -0.674624462 | 0.017251696 | 0.100524307 |
| M420  | 1-carboxyethylvaline                                                | Amino Acid                        | Leucine, Isoleucine and Valine Metabolism                    | 0.745288479  | -0.424129137 | 0.017496697 | 0.101302532 |
| M4252 | cytosine                                                            | Nucleotide                        | Pyrimidine Metabolism, Cytidine containing                   | 0.347510778  | -1.524870369 | 0.018817825 | 0.108262046 |
| M2662 | 1-palmitoyl-GPE (16:0)                                              | Lipid                             | Lyso phospholipid                                            | 0.800135858  | -0.321683114 | 0.018942505 | 0.108293946 |
| M1974 | 2-hydroxybenenate                                                   | Lipid                             | Fatty Acid, Monohydroxy                                      | 1.166794006  | 0.22254988   | 0.019071931 | 0.108352409 |
| M1702 | eicosanedioate (C20-DC)                                             | Lipid                             | Fatty Acid, Dicarboxylate                                    | 0.787682368  | -0.344314113 | 0.019883182 | 0.111566742 |
| M3124 | sphingomyelin (d18:1/21:0, d17:1/22:0, d16:1/23:0)*                 | Lipid                             | Sphingomyelins                                               | 0.796804133  | -0.327702964 | 0.019879206 | 0.111566742 |
| M3535 | glycochenolate sulfate*                                             | Lipid                             | Secondary Bile Acid Metabolism                               | 2.246077243  | 1.167407543  | 0.020065547 | 0.111899279 |
| M1950 | stearoylcholine*                                                    | Lipid                             | Fatty Acid Metabolism (Acyl Choline)                         | 0.646112716  | -0.630142225 | 0.022231822 | 0.123232394 |
| M6431 | branched-chain, straight-chain, or cyclopropyl 10:1 fatty acid (2)* | Partially Characterized Molecules | Partially Characterized Molecules                            | 1.401726494  | 0.487204877  | 0.022672415 | 0.124210277 |
| M2232 | choline                                                             | Lipid                             | Phospholipid Metabolism                                      | 0.834882549  | -0.260354841 | 0.022956355 | 0.124210277 |
| M3541 | taurochenodeoxycholic acid 3-sulfate                                | Lipid                             | Secondary Bile Acid Metabolism                               | 2.72644608   | 1.447021624  | 0.022924191 | 0.124210277 |
| M1881 | undecenoylcarnitine (C11:1)                                         | Lipid                             | Fatty Acid Metabolism (Acyl Carnitine, Monounsaturated)      | 1.465982052  | 0.551867441  | 0.022714714 | 0.124210277 |
| M3536 | taurochenolate sulfate*                                             | Lipid                             | Secondary Bile Acid Metabolism                               | 2.733150296  | 1.450564796  | 0.023278527 | 0.125208169 |
| M460  | 5-carboxyethylcysteine                                              | Amino Acid                        | Methionine, Cysteine, SAM and Taurine Metabolism             | 0.655661445  | -0.608977033 | 0.023596428 | 0.126171489 |
| M2905 | palmitoyl-oleoyl-glycerol (16:0/18:1) [2]*                          | Lipid                             | Diacylglycerol                                               | 0.755022568  | -0.405408327 | 0.023795839 | 0.126493671 |
| M3209 | 3beta-hydroxy-5-cholestenate                                        | Lipid                             | Sterol                                                       | 1.42854534   | 0.5154546826 | 0.024794952 | 0.13028099  |
| M3389 | Salpha-androstan-3beta,17alpha-diol disulfate                       | Lipid                             | Androgenic Steroids                                          | 0.474134158  | -1.076632762 | 0.024715976 | 0.13028099  |
| M278  | xanthurenate                                                        | Amino Acid                        | Tryptophan Metabolism                                        | 0.67666194   | -0.567662851 | 0.026927159 | 0.140671194 |
| M261  | G-glycyltryptophan                                                  | Amino Acid                        | Tryptophan Metabolism                                        | 0.83823857   | -0.254567188 | 0.027336943 | 0.141521486 |
| M1166 | ADSGEGDFAEGGGVR*                                                    | Peptide                           | Fibrinogen Cleavage Peptide                                  | 1.406635639  | 0.492248675  | 0.027556989 | 0.141521486 |
| M1866 | stearoylcarnitine (C18)                                             | Lipid                             | Fatty Acid Metabolism (Acyl Carnitine, Long Chain Saturated) | 0.763652977  | -0.389010904 | 0.027502639 | 0.141521486 |
| M5206 | tarttonate (hydroxymalonate)                                        | Xenobiotics                       | Food Component/Plant                                         | 0.70423184   | -0.505877639 | 0.027952184 | 0.142744582 |
| M3091 | lactosyl-N-nervonoyl-sphingosine (d18:1/24:1)*                      | Lipid                             | Lactosylceramides (LCER)                                     | 0.729994643  | -0.454042218 | 0.028234466 | 0.143380613 |
| M5961 | 2,6-dihydroxybenzoic acid                                           | Xenobiotics                       | Drug - Topical Agents                                        | 0.464488028  | -1.106286684 | 0.028497116 | 0.143910438 |
| M6252 | 5-hydroxy-2-methylpyridine sulfate                                  | Xenobiotics                       | Chemical                                                     | 0.17497532   | -2.514776648 | 0.028813983 | 0.144706586 |
| M4120 | hypoxanthine                                                        | Nucleotide                        | Purine Metabolism, (Hypo)Xanthine/Inosine containing         | 0.689201368  | -0.537002529 | 0.029533908 | 0.147507264 |
| M3386 | Salpha-androstan-3beta,17beta-diol disulfate                        | Lipid                             | Androgenic Steroids                                          | 0.630803816  | -0.664736708 | 0.030380819 | 0.150087852 |
| M1517 | arachidate (20:0)                                                   | Lipid                             | Long Chain Saturated Fatty Acid                              | 1.235695649  | 0.305323452  | 0.030354701 | 0.150087852 |
| M4504 | 4-ethylcatechol sulfate                                             | Xenobiotics                       | Benzoate Metabolism                                          | 0.335282807  | -1.576549588 | 0.031389746 | 0.150969732 |
| M4523 | 4-ethylphenyl sulfate                                               | Xenobiotics                       | Benzoate Metabolism                                          | 0.375897178  | -1.41159001  | 0.031107127 | 0.150969732 |
| M1489 | caproate (6:0)                                                      | Lipid                             | Medium Chain Fatty Acid                                      | 0.884960132  | -0.176315632 | 0.031178713 | 0.150969732 |
| M35   | N-carbamoylalanine                                                  | Amino Acid                        | Alanine and Aspartate Metabolism                             | 0.579581166  | -0.786917382 | 0.031299531 | 0.150969732 |
| M3477 | glycocholate sulfate                                                | Amino Acid                        | Primary Bile Acid Metabolism                                 | 2.882891728  | 1.527516655  | 0.031181303 | 0.150969732 |
| M1    | glycine                                                             | Amino Acid                        | Glycine, Serine and Threonine Metabolism                     | 0.83499903   | -0.260153573 | 0.032169795 | 0.153907072 |
| M1936 | acetoacetate                                                        | Lipid                             | Ketone Bodies                                                | 1.744429121  | 0.802754979  | 0.032996061 | 0.156215727 |
| M1491 | caprylate (8:0)                                                     | Lipid                             | Medium Chain Fatty Acid                                      | 0.718816554  | -0.476304462 | 0.032945435 | 0.156215727 |
| M1543 | eicosenoate (20:1n9 or 1n11)                                        | Lipid                             | Long Chain Monounsaturated Fatty Acid                        | 1.297682129  | 0.375937034  | 0.033722865 | 0.158829454 |
| M4591 | paraxanthine                                                        | Xenobiotics                       | Xanthine Metabolism                                          | 0.583566652  | -0.777030651 | 0.034152808 | 0.160025269 |
| M2889 | diacylglycerol (16:1/18:2 [2], 16:0/18:3 [1])*                      | Lipid                             | Diacylglycerol                                               | 0.752809199  | -0.409643837 | 0.035378815 | 0.164919706 |
| M1567 | linoleate (18:2n6)                                                  | Lipid                             | Long Chain Polyunsaturated Fatty Acid (n3 and n6)            | 1.193202808  | 0.254839278  | 0.036273192 | 0.16737224  |
| M202  | vanillylmandelate (VMA)                                             | Amino Acid                        | Tyrosine Metabolism                                          | 1.33118635   | 0.412712545  | 0.036104411 | 0.16737224  |
| M3098 | myristoyl dihydrosphingomyelin (d18:0/14:0)*                        | Lipid                             | Dihydrosphingomyelins                                        | 0.816658957  | -0.292194372 | 0.037078406 | 0.17022359  |
| M4600 | 1-methylxanthine                                                    | Xenobiotics                       | Xanthine Metabolism                                          | 0.447007472  | -1.161620949 | 0.037598033 | 0.170964133 |
| M6221 | 3-hydroxypropiridine sulfate                                        | Xenobiotics                       | Chemical                                                     | 0.150819197  | -2.729108019 | 0.037615871 | 0.170964133 |
| M1690 | tridecanedioate (C13:1-DC)*                                         | Lipid                             | Fatty Acid, Dicarboxylate                                    | 1.368256489  | -0.22338669  | 0.037963498 | 0.171685671 |
| M2587 | 1-linoleoyl-GPA (18:2)*                                             | Lipid                             | Lyso phospholipid                                            | 0.723208065  | -0.467517329 | 0.038667196 | 0.174002238 |
| M1277 | arabitol/xylitol                                                    | Carbohydrate                      | Pentose Metabolism                                           | 0.851858681  | -0.23131398  | 0.039053233 | 0.174873837 |
| M46   | alpha-ketoglutaramate*                                              | Amino Acid                        | Glutamate Metabolism                                         | 0.838048734  | -0.254893953 | 0.041522711 | 0.185020314 |
| M457  | 5-methylcysteine                                                    | Amino Acid                        | Methionine, Cysteine, SAM and Taurine Metabolism             | 0.774304948  | -0.368668644 | 0.043510659 | 0.19293263  |
| M1570 | dihomolinoleate (20:2n6)                                            | Lipid                             | Long Chain Polyunsaturated Fatty Acid (n3 and n6)            | 1.21949398   | 0.286282637  | 0.043729848 | 0.19293263  |
| M6418 | glycine conjugate of C10H14O2 [1]*                                  | Partially Characterized Molecules | Partially Characterized Molecules                            | 1.409413781  | 0.495095226  | 0.044439163 | 0.19514589  |
| M582  | 2-hydroxybutyrate/2-hydroxyisobutyrate                              | Amino Acid                        | Glutathione Metabolism                                       | 1.197798495  | 0.260385225  | 0.044671703 | 0.195223933 |
| M3361 | androstenediol (3beta,17beta) monosulfate (2)                       | Lipid                             | Androgenic Steroids                                          | 0.587944251  | -0.76624873  | 0.045389947 | 0.197413695 |
| M96   | 1-ribosyl-imidazoleacetate*                                         | Amino Acid                        | Histidine Metabolism                                         | 0.777414132  | -0.363244761 | 0.046308764 | 0.198472459 |
| M1781 | hexanoylglutamine                                                   | Lipid                             | Fatty Acid Metabolism (Acyl Glutamine)                       | 1.359928884  | 0.443599102  | 0.046506748 | 0.198472459 |
| M245  | thyroxine                                                           | Amino Acid                        | Tyrosine Metabolism                                          | 0.846246729  | -0.240849743 | 0.046053639 | 0.198472459 |
| M5218 | vanillic acid glycine                                               | Xenobiotics                       | Food Component/Plant                                         | 0.192727748  | -2.375363779 | 0.046447679 | 0.198472459 |
| M1547 | erucate (22:1n9)                                                    | Lipid                             | Long Chain Monounsaturated Fatty Acid                        | 1.239229149  | 0.309442985  | 0.04747356  | 0.198863897 |
| M3087 | lactosyl-N-palmitoyl-sphingosine (d18:1/16:0)                       | Lipid                             | Lactosylceramides (LCER)                                     | 0.725779666  | -0.462396457 | 0.047436219 | 0.198863897 |
| M1944 | oleoylcholine                                                       | Lipid                             | Fatty Acid Metabolism (Acyl Choline)                         | 0.760651398  | -0.394692668 | 0.047070434 | 0.198863897 |
| M3455 | taurocholate                                                        | Lipid                             | Primary Bile Acid Metabolism                                 | 2.1227706907 | 1.089299432  | 0.046897694 | 0.198863897 |
| M1158 | Fibrinopeptide A (2-15)                                             | Peptide                           | Fibrinogen Cleavage Peptide                                  | 1.305433353  | 0.384528804  | 0.048189911 | 0.200938666 |
| M2813 | 1-(1-enyl-palmitoyl)-2-arachidonoyl-GPC (P-16:0/20:4)*              | Lipid                             | Plasmalogen                                                  | 0.840495071  | -0.250688737 | 0.051951665 | 0.203762362 |
| M1540 | 10-nonadecenoate (19:1n9)                                           | Lipid                             | Long Chain Monounsaturated Fatty Acid                        | 1.23         |              |             |             |

|       |                                                           |                                                              |                                                              |              |              |             |             |
|-------|-----------------------------------------------------------|--------------------------------------------------------------|--------------------------------------------------------------|--------------|--------------|-------------|-------------|
| M3259 | pregnenediol sulfate (C21H34O5S)*                         | Lipid                                                        | Pregnenolone Steroids                                        | 1.562548139  | 0.643900637  | 0.051782991 | 0.203762362 |
| M3101 | sphingomyelin (d18:0/18:0, d19:0/17:0)*                   | Lipid                                                        | Dihydrosphingomyelins                                        | 0.789720709  | -0.340585572 | 0.052005355 | 0.203762362 |
| M485  | urea                                                      | Amino Acid                                                   | Urea cycle; Arginine and Proline Metabolism                  | 0.817828961  | -0.290128943 | 0.050302989 | 0.203762362 |
| M4604 | 5-acetylamino-6-formylamino-3-methyluracil                | Xenobiotics                                                  | Xanthine Metabolism                                          | 0.648092093  | -0.625729262 | 0.050864226 | 0.203762362 |
| M3262 | pregnenetriol disulfate*                                  | Lipid                                                        | Pregnenolone Steroids                                        | 1.437305114  | 0.523366353  | 0.052916841 | 0.206059638 |
| M137  | N,N-dimethyl-5-aminovaleate                               | Amino Acid                                                   | Lysine Metabolism                                            | 0.423607775  | -1.23919911  | 0.053045055 | 0.206059638 |
| M1867 | arachidoylcarnitine (C20)*                                | Lipid                                                        | Fatty Acid Metabolism (Acyl Carnitine, Long Chain Saturated) | 0.702131208  | -0.510187441 | 0.053715601 | 0.206178235 |
| M80   | imidazole propionate                                      | Amino Acid                                                   | Histidine Metabolism                                         | 2.357049557  | 1.236692091  | 0.053641089 | 0.206178235 |
| M2904 | palmitoyl-oleoyl-glycerol (16:0/18:1) [1]*                | Lipid                                                        | Diacylglycerol                                               | 0.776447048  | -0.365040555 | 0.053743871 | 0.206178235 |
| M1971 | 2-hydroxystearate                                         | Lipid                                                        | Fatty Acid, Monohydroxy                                      | 1.14171197   | 0.191198735  | 0.054479908 | 0.206987394 |
| M1947 | dihomo-linolenoyl-choline                                 | Lipid                                                        | Fatty Acid Metabolism (Acyl Choline)                         | 0.655603003  | -0.609105632 | 0.054650137 | 0.206987394 |
| M4121 | xanthine                                                  | Nucleotide                                                   | Purine Metabolism, (Hypo)Xanthine/inosine containing         | 0.474645525  | -1.075077614 | 0.054471765 | 0.206987394 |
| M3100 | behenoyl dihydrosphingomyelin (d18:0/22:0)*               | Lipid                                                        | Dihydrosphingomyelins                                        | 0.811857443  | -0.300701674 | 0.055083218 | 0.207762015 |
| M2924 | oleoyl-oleoyl-glycerol (18:1/18:1) [2]*                   | Lipid                                                        | Diacylglycerol                                               | 0.770129112  | -0.336197304 | 0.055618809 | 0.208915278 |
| M4182 | guanosine                                                 | Nucleotide                                                   | Purine Metabolism, Guanine containing                        | 0.559003548  | -0.838980588 | 0.055960201 | 0.209322603 |
| M1495 | cis-4-decenoate (10:1n6)*                                 | Lipid                                                        | Medium Chain Fatty Acid                                      | 1.270379572  | 0.345259619  | 0.057464063 | 0.213203399 |
| M3064 | glycosyl-N-2-hydroxynonyl)-sphingosine (d18:1/24:1[2OH])* | Lipid                                                        | Hexosylceramides (HCER)                                      | 0.75527361   | -0.404928717 | 0.057361177 | 0.213203399 |
| M2670 | 2-stearoyl-GPE (18:0)*                                    | Lipid                                                        | Lysophospholipid                                             | 0.802424552  | -0.317562345 | 0.057721557 | 0.213288193 |
| M2293 | 1-palmitoyl-2-dihomo-linolenoyl-GPC (16:0/20:3n3 or 6)*   | Lipid                                                        | Phosphatidylcholine (PC)                                     | 0.915773884  | -0.126936672 | 0.059039295 | 0.215705732 |
| M2442 | 1-stearoyl-2-docosahexaenoyl-GPE (18:0/22:6)*             | Lipid                                                        | Phosphatidylethanolamine (PE)                                | 1.21527253   | 0.281279881  | 0.059089441 | 0.215705732 |
| M636  | gamma-glutamylglycine                                     | Peptide                                                      | Gamma-glutamyl Amino Acid                                    | 0.807593504  | -0.308298788 | 0.058693506 | 0.215705732 |
| M2172 | N-oleoyltaurine                                           | Lipid                                                        | Endocannabinoid                                              | 0.689822406  | -0.535703106 | 0.059325002 | 0.215705732 |
| M2418 | 1-palmitoyl-2-docosahexaenoyl-GPE (16:0/22:6)*            | Lipid                                                        | Phosphatidylethanolamine (PE)                                | 1.199493886  | 0.262425804  | 0.060408555 | 0.217041014 |
| M3128 | sphingomyelin (d18:2/23:0, d18:1/23:1, d17:1/24:1)*       | Lipid                                                        | Sphingomyelins                                               | 0.866500234  | -0.206727956 | 0.060185731 | 0.217041014 |
| M219  | gentisate                                                 | Amino Acid                                                   | Tyrosine Metabolism                                          | 0.471296798  | -1.085292215 | 0.060057125 | 0.217041014 |
| M3104 | hydroxypalmitoyl sphingomyelin (d18:1/16:0(OH))           | Lipid                                                        | Sphingomyelins                                               | 0.115593949  | 0.161641806  | 0.06153418  | 0.22021484  |
| M458  | 5-methylcysteine sulfoxide                                | Amino Acid                                                   | Methionine, Cysteine, SAM and Taurine Metabolism             | 0.743375422  | -0.427837104 | 0.06189962  | 0.220569456 |
| M471  | taurine                                                   | Amino Acid                                                   | Methionine, Cysteine, SAM and Taurine Metabolism             | 0.832720525  | -0.264095711 | 0.062118571 | 0.220569456 |
| M2408 | 1-palmitoyl-2-oleoyl-GPE (16:0/18:1)                      | Lipid                                                        | Phosphatidylethanolamine (PE)                                | 1.223231895  | 0.290804072  | 0.063749538 | 0.221396414 |
| M1707 | 3-carboxy-4-methyl-5-pentyl-2-furanpropionate (3-CMPFP)   | Lipid                                                        | Fatty Acid, Dicarboxylate                                    | 0.768829953  | -0.379263552 | 0.063598798 | 0.221396414 |
| M3337 | dehydroepiandrosterone sulfate (DHEA-S)                   | Lipid                                                        | Androgenic Steroids                                          | 1.439402588  | 0.525470158  | 0.062590468 | 0.221396414 |
| M2842 | glycerol-3-phosphate                                      | Lipid                                                        | Glycerolipid Metabolism                                      | 0.792544559  | -0.335436055 | 0.063812828 | 0.221396414 |
| M4552 | p-cresol sulfate                                          | Xenobiotics                                                  | Benzoate Metabolism                                          | 0.507582432  | -0.978285958 | 0.062936454 | 0.221396414 |
| M1889 | nervonylcarnitine (C24:1)*                                | Lipid                                                        | Fatty Acid Metabolism (Acyl Carnitine, Monounsaturated)      | 0.698868724  | -0.51690661  | 0.063182267 | 0.221396414 |
| M5505 | metronidazole                                             | Xenobiotics                                                  | Drug - Antibiotic                                            | 2.3409956415 | 1.227098074  | 0.064804988 | 0.223983799 |
| M1865 | margaroylcarnitine (C17)*                                 | Lipid                                                        | Fatty Acid Metabolism (Acyl Carnitine, Long Chain Saturated) | 0.771287132  | -0.374660054 | 0.065253056 | 0.224678135 |
| M1516 | nonadecanoate (19:0)                                      | Lipid                                                        | Long Chain Saturated Fatty Acid                              | 1.109162691  | 0.225475698  | 0.065990255 | 0.226595026 |
| M4222 | 5,6-dihydrouridine                                        | Nucleotide                                                   | Pyrimidine Metabolism, Uracil containing                     | 0.762420459  | -0.391341262 | 0.066782413 | 0.228215088 |
| M3208 | 3beta,7alpha-dihydroxy-5-cholestenolate                   | Lipid                                                        | Sterol                                                       | 1.137951947  | 0.186439638  | 0.067676044 | 0.230841327 |
| M3360 | androstenediol (3beta,17beta) monosulfate (1)             | Lipid                                                        | Androgenic Steroids                                          | 1.465650098  | 0.5515480713 | 0.068108566 | 0.230795053 |
| M1704 | docosadiate (C22-DC)                                      | Lipid                                                        | Fatty Acid, Dicarboxylate                                    | 0.851269331  | -0.232312439 | 0.068312353 | 0.230795053 |
| M2923 | oleoyl-oleoyl-glycerol (18:1/18:1) [3]*                   | Lipid                                                        | Diacylglycerol                                               | 0.827257021  | -0.273592464 | 0.068552986 | 0.230795053 |
| M4264 | 2'-O-methylcytidine                                       | Nucleotide                                                   | Pyrimidine Metabolism, Cytidine containing                   | 1.31808521   | 0.398443639  | 0.069029607 | 0.231542115 |
| M3253 | 21-hydroxypregnenolone disulfate                          | Lipid                                                        | Pregnenolone Steroids                                        | 1.296073071  | 0.374147058  | 0.07053935  | 0.232319816 |
| M1882 | 5-docosenoylcarnitine (C12:1)                             | Lipid                                                        | Fatty Acid Metabolism (Acyl Carnitine, Monounsaturated)      | 1.223702275  | 0.291252595  | 0.070248139 | 0.232319816 |
| M1948 | linoleoylcholine*                                         | Lipid                                                        | Fatty Acid Metabolism (Acyl Choline)                         | 0.782891772  | -0.353115215 | 0.070391564 | 0.232319816 |
| M336  | N-acetylucine                                             | Amino Acid                                                   | Leucine, Isoleucine and Valine Metabolism                    | 0.788879631  | -0.342122907 | 0.069563221 | 0.232319816 |
| M140  | phenylalanine                                             | Amino Acid                                                   | Phenylalanine Metabolism                                     | 1.109727775  | 0.150205784  | 0.069844429 | 0.232319816 |
| M5410 | celecoxib                                                 | Xenobiotics                                                  | Drug - Analgesics, Anesthetics                               | 1.185099967  | 0.245008761  | 0.070859796 | 0.232532688 |
| M5959 | salicylate                                                | Xenobiotics                                                  | Drug - Topical Agents                                        | 0.086928145  | -3.524032857 | 0.071275147 | 0.233054348 |
| M2438 | 1-stearoyl-2-arachidonoyl-GPE (18:0/20:4)                 | Lipid                                                        | Phosphatidylethanolamine (PE)                                | 1.159607445  | 0.213636501  | 0.071665939 | 0.233492253 |
| M4931 | histidine betaine (herycnine)*                            | Xenobiotics                                                  | Food Component/Plant                                         | 1.500876051  | 0.585804838  | 0.072637975 | 0.233581396 |
| M3112 | sphingomyelin (d17:1/14:0, d16:1/15:0)*                   | Lipid                                                        | Sphingomyelins                                               | 0.798797522  | -0.324098237 | 0.074747037 | 0.241797353 |
| M4147 | adenine                                                   | Nucleotide                                                   | Purine Metabolism, Adenine containing                        | 1.197175557  | 0.259634728  | 0.075390669 | 0.24301467  |
| M97   | 4-imidazoleacetate                                        | Amino Acid                                                   | Histidine Metabolism                                         | 0.680901844  | -0.554481254 | 0.076026512 | 0.244198232 |
| M3048 | ceramide (d18:1/17:0, d17:1/18:0)*                        | Lipid                                                        | Ceramides                                                    | 1.225787106  | 0.293708435  | 0.076804234 | 0.245827926 |
| M639  | gamma-glutamylleucine                                     | Peptide                                                      | Gamma-glutamyl Amino Acid                                    | 0.864995418  | -0.209235605 | 0.078213154 | 0.249458796 |
| M513  | hydroxyproline                                            | Amino Acid                                                   | Urea cycle; Arginine and Proline Metabolism                  | 0.851760131  | -0.231480892 | 0.079434004 | 0.252466933 |
| M3260 | pregnen-diol disulfate*                                   | Lipid                                                        | Pregnenolone Steroids                                        | 1.319713329  | 0.400224579  | 0.080641161 | 0.255410506 |
| M4505 | 4-methylcatechol sulfate                                  | Xenobiotics                                                  | Benzoate Metabolism                                          | 0.522753434  | -0.93579746  | 0.083142098 | 0.259711913 |
| M1512 | aconitate (cis or trans)                                  | Energy                                                       | TCA Cycle                                                    | 1.161895705  | 0.216480574  | 0.082840538 | 0.259711913 |
| M4131 | urate                                                     | Lipid                                                        | Long Chain Saturated Fatty Acid                              | 1.185566287  | 0.245576328  | 0.083136477 | 0.259711913 |
| M4466 | 2-hydroxyhippurate (salicylurate)                         | Nucleotide                                                   | Purine Metabolism, (Hypo)Xanthine/inosine containing         | 0.805556751  | -0.311925256 | 0.082728267 | 0.259711913 |
| M298  | indoleacetate                                             | Xenobiotics                                                  | Benzoate Metabolism                                          | 0.095158659  | -0.180274036 | 0.08367621  | 0.26006152  |
| M3009 | N-palmitoyl-sphingosine (d18:0/16:0)                      | Amino Acid                                                   | Tryptophan Metabolism                                        | 0.814917423  | -0.295274219 | 0.083810107 | 0.26006152  |
| M4597 | 1,7-dimethylurate                                         | Lipid                                                        | Dihydroceramides                                             | 1.173979391  | 0.231407083  | 0.084379098 | 0.260886396 |
| M3113 | sphingomyelin (d18:1/14:0, d16:1/16:0)*                   | Xenobiotics                                                  | Xanthine Metabolism                                          | 0.579926872  | -0.786057105 | 0.084765575 | 0.261192906 |
| M6254 | 3-hydroxy-2-methylpyridine sulfate                        | Lipid                                                        | Sphingomyelins                                               | 0.885461759  | -0.175498093 | 0.085497632 | 0.262558605 |
| M78   | trans-urocanate                                           | Xenobiotics                                                  | Chemical                                                     | 0.240398305  | -0.056501372 | 0.087797432 | 0.268713353 |
| M1180 | Fibrinopeptide B (1-13)                                   | Amino Acid                                                   | Histidine Metabolism                                         | 3.902649909  | 1.96445405   | 0.089180065 | 0.272029127 |
| M1695 | hexadecanedioate (C16)                                    | Peptide                                                      | Fibrinogen Cleavage Peptide                                  | 1.202696461  | 0.266272578  | 0.090283169 | 0.272881003 |
| M1943 | palmitoylcholine                                          | Lipid                                                        | Fatty Acid, Dicarboxylate                                    | 1.296100802  | 0.374717795  | 0.090359936 | 0.272881003 |
| M1915 | suberoylcarnitine (C8-DC)                                 | Lipid                                                        | Fatty Acid Metabolism (Acyl Choline)                         | 0.802661715  | -0.317136009 | 0.089866434 | 0.272881003 |
| M5203 | caffeic acid sulfate                                      | Lipid                                                        | Fatty Acid Metabolism (Acyl Carnitine, Dicarboxylate)        | 1.675739082  | 0.744797534  | 0.091438702 | 0.275173261 |
| M3401 | 11beta-hydroxyandrostosterone glucuronide                 | Xenobiotics                                                  | Food Component/Plant                                         | 0.298494658  | -1.744222981 | 0.09172442  | 0.275173261 |
| M5404 | salicylicuric glucuronide*                                | Lipid                                                        | Androgenic Steroids                                          | 1.415950125  | 0.50177045   | 0.092101677 | 0.275173261 |
| M1443 | isocitrate                                                | Lipid                                                        | Drug - Analgesics, Anesthetics                               | 0.162044455  | -2.625538441 | 0.092410497 | 0.275413581 |
| M494  | homocitrulline                                            | Energy                                                       | TCA Cycle                                                    | 1.180564663  | 0.239477065  | 0.093254525 | 0.277020795 |
| M1406 | glucuronate                                               | Amino Acid                                                   | Urea cycle; Arginine and Proline Metabolism                  | 0.737152935  | -0.439964133 | 0.095605544 | 0.283082569 |
| M1533 | oleate/vaccenate (18:1)                                   | Amino Acid                                                   | Aminoglycine Metabolism                                      | 1.503768904  | 0.58582874   | 0.096927047 | 0.286060668 |
| M117  | hydroxy-N6,N6,N6-trimethyllysine*                         | Lipid                                                        | Long Chain Monounsaturated Fatty Acid                        | 1.162490385  | 0.217218783  | 0.097307921 | 0.286255341 |
| M4207 | crotonate                                                 | Lysine Metabolism                                            | Lysine Metabolism                                            | 0.777245294  | -0.363558118 | 0.097764032 | 0.28669937  |
| M4780 | isopropylmalate                                           | Pyrimidine Metabolism, Orotate containing                    | Pyrimidine Metabolism, Orotate containing                    | 0.364905708  | -1.454404377 | 0.098235721 | 0.287126227 |
| M1864 | palmitoylcarnitine (C16)                                  | Food Component/Plant                                         | Food Component/Plant                                         | 0.563083985  | -0.828577975 | 0.099064674 | 0.287699005 |
| M4254 | 3-methylcytidine                                          | Fatty Acid Metabolism (Acyl Carnitine, Long Chain Saturated) | Fatty Acid Metabolism (Acyl Carnitine, Long Chain Saturated) | 0.856512634  | -0.223453568 | 0.098897228 | 0.287699005 |
| M5514 | fluconazole                                               | Pyrimidine Metabolism, Cytidine containing                   | Pyrimidine Metabolism, Cytidine containing                   | 1.234587122  | 0.304028648  | 0.099795076 | 0.288433739 |
| M1884 | myristoleoylcarnitine (C14:1)*                            | Xenobiotics                                                  | Drug - Antibiotic                                            | 0.525909335  | -0.92711399  | 0.099952286 | 0.288433739 |
| M1418 | N-acetylneuraminate                                       | Lipid                                                        | Fatty Acid Metabolism (Acyl Carnitine, Monounsaturated)      | 1.236759239  | 0.306564677  | 0.101398001 | 0.291679692 |
| M3526 | glycylcholate                                             | Amino Acid                                                   | Aminoglycine Metabolism                                      | 0.891836923  | -0.165148164 | 0.101869027 | 0.292110239 |
| M3281 | Salpha-pregnan-diol disulfate                             | Lipid                                                        | Secondary Bile Acid Metabolism                               | 1.76288246   | 0.817936287  | 0.102197839 | 0.292131559 |
| M3081 | glycosyl ceramide (d18:1/23:1, d17:1/24:1)*               | Lipid                                                        | Progestin Steroids                                           | 1.70565834   | 0.771098188  | 0.102736069 | 0.292749489 |
| M340  | 1-carboxyethylleucine                                     | Lipid                                                        | Hexosylceramides (HCER)                                      | 0.582689253  | -0.779201393 | 0.103756575 | 0.29473252  |
| M2848 | 1-myristoylglycerol (14:0)                                | Amino Acid                                                   | Leucine, Isoleucine and Valine Metabolism                    | 0.763588846  | -0.389132065 | 0.105657349 | 0.297076324 |
| M5214 | 3-indoleglyoxylic acid                                    | Lipid                                                        | Monocacylglycerol                                            | 0.567887208  | -0.816323681 | 0.105875865 | 0.297076324 |
| M4893 | ergothioneine                                             | Xenobiotics                                                  | Food Component/Plant                                         | 0.824672705  | -0.278106437 | 0.105888591 | 0.297076324 |
| M2669 | 1-stearoyl-GPE (18:0)                                     | Xenobiotics                                                  | Food Component/Plant                                         | 1.606517402  | 0.68939608   | 0.105811739 | 0.297076324 |
| M3120 | sphingomyelin (d18:1/19:0, d19:1/18:0)*                   | Lipid                                                        | Lysophospholipid                                             | 0.853633807  | -0.228313072 | 0.106959954 | 0.298326256 |
| M3517 | glycoursodeoxycholic acid sulfate (1)                     | Lipid                                                        | Sphingomyelins                                               | 0.876944504  | -0.189442548 | 0.106909494 | 0.298326256 |
| M2425 | 1-stearoyl-2-oleoyl-GPE (18:0/18:1)                       | Lipid                                                        | Secondary Bile Acid Metabolism                               | 1.885833699  | 0.915202458  | 0.108056732 | 0.30077889  |
| M1577 | docosadienoate (22:2n6)                                   | Lipid                                                        | Phosphatidylethanolamine (PE)                                | 1.223441403  | 0.290945005  | 0.109914333 | 0.304610149 |
| M2    | N-acetylglycine                                           | Lipid                                                        | Long Chain Polysaturated Fatty Acid (n3 and n6)              | 1.157738931  | 0.211309963  | 0.110591595 | 0.304989166 |
| M1178 | Fibrinopeptide B (1-11)                                   | Lipid                                                        | Glycine, Serine and Threonine Metabolism                     | 1.250818782  | 0.322872788  | 0.110722139 | 0.304989166 |
| M473  | N-acetyltaurine                                           | Amino Acid                                                   | Fibrinogen Cleavage Peptide                                  | 1.263100595  | 0.336969542  | 0.11184134  | 0.305366011 |
| M4336 | pantothenate (Vitamin B5)                                 | Peptide                                                      | Methionine, Cysteine, SAM and Taurine Metabolism             | 0.727616687  | -0.458749464 | 0.112202693 | 0.305366011 |
| M545  | spermidine                                                | Amino Acid                                                   | Pantothenate and CoA Metabolism                              | 0.68693404   | -0.202681428 | 0.111935347 | 0.305366011 |
| M3540 | glycodeoxycholate 3-sulfate                               | Lipid                                                        | Polyamine Metabolism                                         | 0.581957136  | -0.7810152   | 0.111830715 | 0.305366011 |
| M5088 | 4-allylphenol sulfate                                     | Secondary Bile Acid Metabolism                               | Secondary Bile Acid Metabolism                               | 1.685973503  | 0.753581863  | 0.113086627 | 0.306852966 |
| M6241 | perfluorooctanoate (PFOA)                                 | Xenobiotics                                                  | Food Component/Plant                                         | 0.579559062  | -0.786972403 | 0.114037886 |             |

|       |                                                                     |                                   |                                                              |             |                |             |             |
|-------|---------------------------------------------------------------------|-----------------------------------|--------------------------------------------------------------|-------------|----------------|-------------|-------------|
| M4431 | carotene diol (1)                                                   | Cofactors and Vitamins            | Vitamin A Metabolism                                         | 0.810434956 | -0.303231693   | 0.117897651 | 0.308844279 |
| M1448 | succinate                                                           | Energy                            | TCA Cycle                                                    | 0.876399638 | -0.190339206   | 0.11852499  | 0.309595448 |
| M1161 | Fibrinopeptide A [3-16]                                             | Peptide                           | Fibrinogen Cleavage Peptide                                  | 1.229936397 | 0.298583712    | 0.119594145 | 0.310603079 |
| M2162 | palmitoyl ethanolamide                                              | Lipid                             | Endocannabinoid                                              | 1.106876791 | 0.146494641    | 0.119526284 | 0.310603079 |
| M3454 | glycocholate                                                        | Lipid                             | Primary Bile Acid Metabolism                                 | 1.496746193 | 0.581829601    | 0.1199814   | 0.310721061 |
| M3082 | glycosyl ceramide (d18:2/24:1, d18:1/24:2)*                         | Lipid                             | Hexosylceramides (HCER)                                      | 0.759300479 | -0.397257177   | 0.122173609 | 0.313792076 |
| M3025 | N-stearoyl-sphingosine (d18:1/18:0)*                                | Lipid                             | Ceramides                                                    | 1.176815033 | 0.234887582    | 0.122202855 | 0.313792076 |
| M3121 | sphingomyelin (d18:1/20:0, d16:1/22:0)*                             | Lipid                             | Sphingomyelins                                               | 0.918286295 | -0.12296837    | 0.121662429 | 0.313792076 |
| M1487 | butyrate/isobutyrate (4:0)                                          | Lipid                             | Short Chain Fatty Acid                                       | 0.789374625 | -0.341217951   | 0.125010673 | 0.319198599 |
| M1689 | dodecadienoate (12:2)*                                              | Lipid                             | Fatty Acid, Dicarboxylate                                    | 1.158720002 | 0.21253199     | 0.124688776 | 0.319198599 |
| M2002 | 9-hydroxytearate                                                    | Lipid                             | Fatty Acid, Monohydroxy                                      | 0.796329649 | -0.328562323   | 0.126524988 | 0.321260374 |
| M1262 | ribitol                                                             | Carbohydrate                      | Pentose Metabolism                                           | 0.897545876 | -0.155942414   | 0.12646229  | 0.321260374 |
| M123  | 2-aminoadipate                                                      | Amino Acid                        | Lysine Metabolism                                            | 0.859120979 | -0.219066792   | 0.127616615 | 0.323129534 |
| M2937 | stearoyl-arachidonoyl-glycerol (18:0/20:4) [1]*                     | Lipid                             | Diacylglycerol                                               | 0.854183852 | -0.227384747   | 0.128469812 | 0.324386276 |
| M375  | 3-methylglutaryl-carnitine (2)                                      | Amino Acid                        | Leucine, Isoleucine and Valine Metabolism                    | 0.773355535 | -0.270796278   | 0.130318906 | 0.327237252 |
| M2031 | 9,10-DiHOME                                                         | Lipid                             | Fatty Acid, Dihydroxy                                        | 1.635777082 | 0.709976157    | 0.130182019 | 0.327237252 |
| M274  | N-formylanthranilic acid                                            | Amino Acid                        | Tryptophan Metabolism                                        | 1.474880281 | 0.560597852    | 0.131636662 | 0.329635609 |
| M1706 | hydroxy-CMPF*                                                       | Lipid                             | Fatty Acid, Dicarboxylate                                    | 0.801155046 | -0.319846623   | 0.132709059 | 0.331408062 |
| M4316 | 1-methylnicotinamide                                                | Cofactors and Vitamins            | Nicotinate and Nicotinamide Metabolism                       | 0.736156015 | -0.441916544   | 0.133676165 | 0.33213905  |
| M3490 | taurodeoxycholic acid 3-sulfate                                     | Lipid                             | Secondary Bile Acid Metabolism                               | 1.704567398 | 0.769405644    | 0.135420125 | 0.33633031  |
| M1979 | 3-hydroxyhexanoate                                                  | Lipid                             | Fatty Acid, Monohydroxy                                      | 1.207556506 | 0.272090699    | 0.136942834 | 0.338263685 |
| M462  | cystine                                                             | Amino Acid                        | Methionine, Cysteine, SAM and Taurine Metabolism             | 0.920618334 | -0.11932492    | 0.136596051 | 0.338263685 |
| M1643 | cis-3,4-methyleneheptanoate                                         | Lipid                             | Fatty Acid, Branched                                         | 1.167895449 | 0.223911128    | 0.138425537 | 0.340999494 |
| M4636 | 2-piperidone                                                        | Xenobiotics                       | Food Component/Plant                                         | 0.478752105 | -1.062649264   | 0.139066741 | 0.341240557 |
| M1468 | phosphate                                                           | Energy                            | Oxidative Phosphorylation                                    | 0.845102545 | -0.242801685   | 0.139274199 | 0.341240557 |
| M3224 | campesterol                                                         | Lipid                             | Sterol                                                       | 1.394513934 | 0.47976235     | 0.141945254 | 0.344075295 |
| M4357 | gulonate*                                                           | Cofactors and Vitamins            | Ascorbate and Aldarate Metabolism                            | 0.68196403  | -0.552232448   | 0.141114695 | 0.344075295 |
| M2931 | linoleoyl-linoleoyl-glycerol (18:2/18:2) [1]*                       | Lipid                             | Diacylglycerol                                               | 1.532529864 | 0.615915188    | 0.141942737 | 0.344075295 |
| M3021 | N-palmitoyl-sphingosine (d18:1/16:0)                                | Lipid                             | Ceramides                                                    | 1.135697717 | 0.183578891    | 0.14138984  | 0.344075295 |
| M1460 | 2-methylcitrate/homocitrate                                         | Energy                            | TCA Cycle                                                    | 1.125201397 | 0.170183249    | 0.143641189 | 0.346339101 |
| M1157 | ADSGEGFXAEGGGVR*                                                    | Peptide                           | Fibrinogen Cleavage Peptide                                  | 1.315902883 | 0.396053019    | 0.143582415 | 0.346339101 |
| M468  | cysteine sulfonic acid                                              | Amino Acid                        | Methionine, Cysteine, SAM and Taurine Metabolism             | 1.203425805 | 0.267147198    | 0.145527534 | 0.34995907  |
| M55   | N-acetyl-aspartyl-glutamate (NAAG)                                  | Amino Acid                        | Glutamate Metabolism                                         | 1.211246003 | 0.276491905    | 0.146754159 | 0.351977654 |
| M1869 | lignocericarnitine (C24)*                                           | Lipid                             | Fatty Acid Metabolism (Acyl Carnitine, Long Chain Saturated) | 0.872656464 | -0.196514271   | 0.148489643 | 0.354270565 |
| M47   | N-acetylglutamate                                                   | Amino Acid                        | Glutamate Metabolism                                         | 0.878169058 | -0.187429392   | 0.148462276 | 0.354270565 |
| M4280 | 5,6-dihydrothymine                                                  | Nucleotide                        | Pyrimidine Metabolism, Thymine containing                    | 0.520277798 | -0.942645448   | 0.14915482  | 0.354925998 |
| M1514 | stearate (18:0)                                                     | Lipid                             | Long Chain Saturated Fatty Acid                              | 1.10909646  | 0.149384844    | 0.150155341 | 0.356373903 |
| M6430 | branched-chain, straight-chain, or cyclopropyl 10:1 fatty acid (1)* | Partially Characterized Molecules | Partially Characterized Molecules                            | 1.325420832 | 0.4084505      | 0.150927402 | 0.357267067 |
| M4476 | benzoate                                                            | Xenobiotics                       | Benzoate Metabolism                                          | 1.343030612 | 0.154923188    | 0.151937628 | 0.358737632 |
| M2725 | 1-linoleoyl-GP* (18:2)*                                             | Lipid                             | Lysophospholipid                                             | 1.112806854 | 0.154203211    | 0.154920591 | 0.363883249 |
| M1814 | cis-3,4-methyleneheptanoylglycine                                   | Lipid                             | Fatty Acid Metabolism (Acyl Glycine)                         | 1.208905279 | 0.37796228     | 0.154550617 | 0.363883249 |
| M491  | 2-oxoarginine*                                                      | Amino Acid                        | Urea cycle; Arginine and Proline Metabolism                  | 0.798451337 | -0.324723612   | 0.156194173 | 0.365048955 |
| M1351 | mannitol/sorbitol                                                   | Carbohydrate                      | Fructose, Mannose and Galactose Metabolism                   | 0.458328695 | -1.125545483   | 0.156252079 | 0.365048955 |
| M5736 | ondansetron                                                         | Xenobiotics                       | Drug - Gastrointestinal                                      | 1.678313619 | 0.747012331    | 0.156621664 | 0.365048955 |
| M1162 | Fibrinopeptide A [5-16]*                                            | Peptide                           | Fibrinogen Cleavage Peptide                                  | 1.145261058 | 0.195676493    | 0.158755136 | 0.368982045 |
| M2242 | glycerophosphoinositol*                                             | Lipid                             | Phospholipid Metabolism                                      | 1.132228181 | 0.179164738    | 0.15912097  | 0.368982045 |
| M5116 | 4-vinylguaicol sulfate                                              | Xenobiotics                       | Food Component/Plant                                         | 0.479267972 | -1.061095563   | 0.161156193 | 0.372750583 |
| M1952 | arachidonoylcholine                                                 | Lipid                             | Fatty Acid Metabolism (Acyl Choline)                         | 0.822528653 | -0.281862158   | 0.161902894 | 0.373527234 |
| M2404 | 1,2-dipalmitoyl-GPE (16:0/16:0)*                                    | Lipid                             | Phosphatidylethanolamine (PE)                                | 1.268935628 | 0.343618885    | 0.163523807 | 0.376311748 |
| M254  | tryptophan                                                          | Amino Acid                        | Tryptophan Metabolism                                        | 0.910046139 | -0.135988403   | 0.164497749 | 0.377597106 |
| M489  | 3-amino-2-piperidone                                                | Amino Acid                        | Urea cycle; Arginine and Proline Metabolism                  | 0.863887568 | -0.211084532   | 0.166025194 | 0.379188195 |
| M3114 | sphingomyelin (d18:2/14:0, d18:1/14:1)*                             | Lipid                             | Sphingomyelins                                               | 0.849136325 | -0.235931904   | 0.165917507 | 0.379188195 |
| M79   | cis-urocanate                                                       | Amino Acid                        | Histidine Metabolism                                         | 1.940462533 | 0.956400578    | 0.168944514 | 0.384567024 |
| M1951 | docosahexaenoylcholine                                              | Lipid                             | Fatty Acid Metabolism (Acyl Choline)                         | 0.805485524 | -0.312069433   | 0.169649479 | 0.384567024 |
| M1164 | Fibrinopeptide A [8-16]                                             | Peptide                           | Fibrinogen Cleavage Peptide                                  | 0.84859574  | -0.236850658   | 0.169337339 | 0.384567024 |
| M5249 | 2-acetamidophenol sulfate                                           | Xenobiotics                       | Food Component/Plant                                         | 0.65735919  | -0.6052462     | 0.170196964 | 0.384848358 |
| M1959 | 2-hydroxyheptanoate*                                                | Lipid                             | Fatty Acid, Monohydroxy                                      | 1.206477618 | 0.270801152    | 0.170891505 | 0.385459995 |
| M453  | cystathionine                                                       | Amino Acid                        | Methionine, Cysteine, SAM and Taurine Metabolism             | 1.762219556 | 0.817393682    | 0.17369897  | 0.390824707 |
| M3090 | lactosyl-N-behenoyl-sphingosine (d18:1/22:0)*                       | Lipid                             | Lactosylceramides (LCEr)                                     | 0.860279471 | -0.217122684   | 0.174457649 | 0.391560501 |
| M138  | N,N,N-trimethyl-5-aminovaleate                                      | Amino Acid                        | Lysine Metabolism                                            | 0.858669642 | -0.219824909   | 0.175976741 | 0.393997185 |
| M1648 | (16 or 17)-methylstearate (a19:0 or i19:0)                          | Lipid                             | Fatty Acid, Branched                                         | 1.147355387 | 0.198312328    | 0.177049615 | 0.395425308 |
| M2850 | 1-pentadecanoylglycerol (15:0)                                      | Lipid                             | Monooacylglycerol                                            | 0.670758171 | -0.576135372   | 0.179104708 | 0.398059119 |
| M2711 | 1-stearoyl-GPG (18:0)                                               | Lipid                             | Lysophospholipid                                             | 0.400856894 | -1.31884081    | 0.178843184 | 0.398059119 |
| M2281 | 1-palmitoyl-2-stearoyl-GPC (16:0/18:0)                              | Lipid                             | Phosphatidylcholine (PC)                                     | 0.538418387 | -0.893200415   | 0.182136332 | 0.403809574 |
| M2717 | 1-palmitoyl-GP* (16:0)                                              | Lipid                             | Lysophospholipid                                             | 0.881464829 | 0.182025089    | 0.182948143 | 0.403809574 |
| M5250 | 2-aminophenol sulfate                                               | Xenobiotics                       | Food Component/Plant                                         | 0.5627431   | -0.829451632   | 0.184639383 | 0.403969624 |
| M363  | beta-hydroxyisovalerate                                             | Amino Acid                        | Leucine, Isoleucine and Valine Metabolism                    | 1.187329102 | 0.247719875    | 0.184334189 | 0.403969624 |
| M3063 | glycosyl-N-nervonoyl-sphingosine (d18:1/24:1)*                      | Lipid                             | Hexosylceramides (HCER)                                      | 0.7158216   | -0.482328016   | 0.184271123 | 0.403969624 |
| M83   | imidazole lactate                                                   | Amino Acid                        | Histidine Metabolism                                         | 0.893485588 | -0.162483636   | 0.184430577 | 0.403969624 |
| M2871 | 2-oleoylglycerol (18:1)                                             | Lipid                             | Monooacylglycerol                                            | 0.691588987 | -0.5302132     | 0.186455165 | 0.406756926 |
| M4241 | N-acetyl-beta-alanine                                               | Nucleotide                        | Pyrimidine Metabolism, Uracil containing                     | 0.79978218  | -0.322230958   | 0.186598062 | 0.406756926 |
| M2938 | stearoyl-arachidonoyl-glycerol (18:0/20:4) [2]*                     | Lipid                             | Diacylglycerol                                               | 0.839237718 | -0.252848577   | 0.187291129 | 0.407290996 |
| M2800 | 1-[1-enyl-palmitoyl]-2-oleoyl-GPE (P-16:0/18:1)*                    | Lipid                             | Plasmalogen                                                  | 0.909045263 | -0.137575965   | 0.188010489 | 0.408083485 |
| M2534 | 1-palmitoyl-2-oleoyl-GPI (16:0/18:1)*                               | Lipid                             | Phosphatidylinositol (PI)                                    | 0.888016201 | -0.171342098   | 0.192725991 | 0.414155854 |
| M4409 | bilirubin [E,E]*                                                    | Cofactors and Vitamins            | Hemoglobin and Porphyrin Metabolism                          | 0.847501056 | -0.238712929   | 0.192101664 | 0.414155854 |
| M3033 | N-behenoyl-sphingadienine (d18:2/22:0)*                             | Ceramides                         | Ceramides                                                    | 0.898632967 | -0.154196106   | 0.19199228  | 0.414155854 |
| M6204 | triethanolamine                                                     | Xenobiotics                       | Chemical                                                     | 0.070314552 | -3.830032892   | 0.192499387 | 0.414155854 |
| M2806 | 1-(1-enyl-palmitoyl)-2-oleoyl-GPC (P-16:0/18:1)*                    | Lipid                             | Plasmalogen                                                  | 0.907660169 | -0.139775846   | 0.196220145 | 0.414496941 |
| M2721 | 1-stearoyl-GPI (18:0)                                               | Lipid                             | Lysophospholipid                                             | 0.902800283 | -0.147521225   | 0.19776309  | 0.414496941 |
| M322  | 3-indoxyl sulfate                                                   | Amino Acid                        | Tryptophan Metabolism                                        | 0.652040116 | -0.616967368   | 0.194614158 | 0.414496941 |
| M1995 | 5-hydroxyhexanoate                                                  | Lipid                             | Fatty Acid, Monohydroxy                                      | 1.300224186 | 0.378760396    | 0.196686215 | 0.414496941 |
| M6235 | 6-hydroxyindole sulfate                                             | Xenobiotics                       | Chemical                                                     | 0.66999121  | -0.577785926   | 0.19790063  | 0.414496941 |
| M529  | creatinine                                                          | Amino Acid                        | Creatine Metabolism                                          | 1.070185275 | 0.097860583    | 0.197320703 | 0.414496941 |
| M2932 | linoleoyl-linoleoyl-glycerol (18:2/18:2) [2]*                       | Lipid                             | Diacylglycerol                                               | 1.314150059 | 0.394130022    | 0.193457784 | 0.414496941 |
| M1756 | N-acetyl-2-aminooctanoate*                                          | Lipid                             | Fatty Acid, Amino                                            | 0.722001279 | -0.469926702   | 0.197571284 | 0.414496941 |
| M270  | N-acetylkynurenine (2)                                              | Amino Acid                        | Tryptophan Metabolism                                        | 0.743414726 | -0.427760828   | 0.196249555 | 0.414496941 |
| M5007 | piperine                                                            | Xenobiotics                       | Food Component/Plant                                         | 0.635415571 | -0.654427651   | 0.197897885 | 0.414496941 |
| M5077 | thymol sulfate                                                      | Xenobiotics                       | Food Component/Plant                                         | 0.493867891 | -1.017802921   | 0.195236482 | 0.414496941 |
| M23   | O-acetylhomoserine                                                  | Amino Acid                        | Glycine, Serine and Threonine Metabolism                     | 0.047737487 | -5.817078944   | 0.200556871 | 0.419094702 |
| M1569 | linolenate (18:3n3 or 3n6)                                          | Lipid                             | Long Chain Polyunsaturated Fatty Acid (n3 and n6)            | 1.142861577 | 0.192650676    | 0.2010991   | 0.419263949 |
| M299  | indoleacetate                                                       | Amino Acid                        | Tryptophan Metabolism                                        | 0.428610267 | -0.271809076   | 0.202292352 | 0.419825908 |
| M5936 | diphenhydramine                                                     | Xenobiotics                       | Drug - Respiratory                                           | 3.13350289  | 1.647776324    | 0.201842004 | 0.419825908 |
| M180  | 4-hydroxyphenylacetoyl-carnitine                                    | Amino Acid                        | Tyrosine Metabolism                                          | 1.495815773 | 0.580932502    | 0.203449577 | 0.420254549 |
| M4590 | caffeine                                                            | Xenobiotics                       | Xanthine Metabolism                                          | 0.712727538 | -0.488577427   | 0.204810523 | 0.420254549 |
| M634  | gamma-glutamylglutamate                                             | Peptide                           | Gamma-glutamyl Amino Acid                                    | 0.793828343 | -0.333101021   | 0.203951047 | 0.420254549 |
| M44   | glutamate                                                           | Amino Acid                        | Glutamate Metabolism                                         | 0.880729239 | -0.183229533   | 0.204553447 | 0.420254549 |
| M5738 | diphenoxylate                                                       | Xenobiotics                       | Drug - Gastrointestinal                                      | 1.368768861 | 0.452878845    | 0.203249873 | 0.420254549 |
| M3126 | sphingomyelin (d18:1/22:1, d18:2/22:0, d16:1/24:1)*                 | Lipid                             | Sphingomyelins                                               | 0.9343363   | -0.097986175   | 0.205986054 | 0.421713771 |
| M3125 | sphingomyelin (d18:2/21:0, d16:2/23:0)*                             | Lipid                             | Sphingomyelins                                               | 0.896287728 | -0.157966152   | 0.207325467 | 0.423503033 |
| M4221 | pseudouridine                                                       | Nucleotide                        | Pyrimidine Metabolism, Uracil containing                     | 0.873441544 | -0.195216943   | 0.210428914 | 0.42887866  |
| M3043 | N-palmitoyl-heptadecaspingosine (d17:1/16:0)*                       | Lipid                             | Ceramides                                                    | 1.131348584 | 0.178043512    | 0.213008033 | 0.433164537 |
| M6175 | 2-naphthol sulfate                                                  | Xenobiotics                       | Chemical                                                     | 0.769703915 | -0.377624509   | 0.214025507 | 0.433307133 |
| M4376 | delta-CEH                                                           | Cofactors and Vitamins            | Tocopherol Metabolism                                        | 1.482252614 | 0.567791341    | 0.214031796 | 0.433307133 |
| M3342 | epiandrosterone sulfate                                             | Lipid                             | Androgenic Steroids                                          | 0.757430474 | -0.400814629   | 0.217276475 | 0.438898479 |
| M2803 | 1-[1-enyl-palmitoyl]-2-palmitoleoyl-GPC (P-16:0/16:1)*              | Lipid                             | Plasmalogen                                                  | 0.824148106 | -0.279024471   | 0.218583586 | 0.439585133 |
| M6423 | pentose acid*                                                       | Partially Characterized Molecules | Partially Characterized Molecules                            | 0.732584405 | -0.448933105   | 0.218432369 | 0.439585133 |
| M1887 | ecosenoyl-carnitine (C20:1)*                                        | Lipid                             | Fatty Acid Metabolism (Acyl Carnitine, Monounsaturated)      | 0.830938539 | -0.267186324   | 0.22077485  | 0.44007965  |
| M6452 | glutamine_degradant*                                                | Partially Characterized Molecules | Partially Characterized Molecules                            | 1.249458096 | 0.321302517    | 0.220385424 | 0.44007965  |
| M1433 | N-acetylglucosamine/N-acetylgalactosamine                           | Carbohydrate                      | Aminosugar Metabolism                                        | 1.083684282 | 0.115944506    | 0.219336901 | 0.44007965  |
| M5    | sarcosine                                                           | Amino Acid                        | Glycine, Serine and Threonine Metabolism                     | 0.822860068 | -0.281280981</ |             |             |

|       |                                                    |                                   |                                                       |              |              |             |             |
|-------|----------------------------------------------------|-----------------------------------|-------------------------------------------------------|--------------|--------------|-------------|-------------|
| M515  | prolylhydroxyproline                               | Amino Acid                        | Urea cycle; Arginine and Proline Metabolism           | 0.867438559  | -0.205166521 | 0.227679297 | 0.445794562 |
| M1694 | tetradecadienediote (C14:2-DC)*                    | Lipid                             | Fatty Acid, Dicarboxylate                             | 1.182406489  | 0.241726092  | 0.229288373 | 0.447259939 |
| M4530 | 4-vinylcatechol sulfate                            | Xenobiotics                       | Benzoate Metabolism                                   | 0.381883111  | -1.388796976 | 0.232036987 | 0.449254856 |
| M424  | alpha-hydroxysulvalerate                           | Amino Acid                        | Leucine, Isoleucine and Valine Metabolism             | 1.116729811  | 0.159280173  | 0.231390181 | 0.449254856 |
| M522  | argininate*                                        | Amino Acid                        | Urea cycle; Arginine and Proline Metabolism           | 0.830684146  | -0.267628075 | 0.231951207 | 0.449254856 |
| M455  | cysteine                                           | Amino Acid                        | Methionine, Cysteine, SAM and Taurine Metabolism      | 1.121743882  | 0.165743316  | 0.232972208 | 0.449254856 |
| M437  | N-formylmethionine                                 | Amino Acid                        | Methionine, Cysteine, SAM and Taurine Metabolism      | 0.911841552  | -0.133144941 | 0.233276449 | 0.449254856 |
| M2911 | palmitoleyl-linoleoyl-glycerol (16:1/18:2) [1]*    | Lipid                             | Diacylglycerol                                        | 0.794177889  | -0.332465972 | 0.232776972 | 0.449254856 |
| M867  | leucylalanine                                      | Peptide                           | Dipeptide                                             | 0.787159186  | -0.345272676 | 0.235272742 | 0.452140867 |
| M1447 | succinylcarnitine (C4-DC)                          | Energy                            | TCA Cycle                                             | 1.157262425  | 0.210716052  | 0.236286223 | 0.453131175 |
| M351  | isovalerate (C5)                                   | Amino Acid                        | Leucine, Isoleucine and Valine Metabolism             | 0.878436313  | -0.1869904   | 0.239630651 | 0.458577394 |
| M1220 | 1,5-anhydroglucitol (1,5-AG)                       | Carbohydrate                      | Glycolysis, Gluconeogenesis, and Pyruvate Metabolism  | 0.856878677  | -0.222837143 | 0.242223362 | 0.462565202 |
| M1671 | maleate                                            | Lipid                             | Fatty Acid, Dicarboxylate                             | 1.454988026  | 0.541007728  | 0.244447656 | 0.465712788 |
| M3123 | spingomyelin (d18:1/20:2, d18:2/20:1, d16:1/22:2)* | Lipid                             | Sphingomyelins                                        | 1.084784643  | 0.11740866   | 0.244896274 | 0.465712788 |
| M2279 | 1-palmitoyl-2-palmitoleyl-GPC (16:0/16:1)*         | Lipid                             | Phosphatidylcholine (PC)                              | 0.877714689  | -0.188123117 | 0.247512228 | 0.469450104 |
| M434  | methionine                                         | Amino Acid                        | Methionine, Cysteine, SAM and Taurine Metabolism      | 0.895651453  | -0.154310921 | 0.247894444 | 0.469450104 |
| M5129 | 2-keto-3-deoxy gluconate                           | Xenobiotics                       | Food Component/Plant                                  | 0.87112995   | -0.199040147 | 0.250801848 | 0.472727686 |
| M1576 | docosapentaenoate (n6 DPA; 22:5n6)                 | Lipid                             | Long Chain Polyunsaturated Fatty Acid (n3 and n6)     | 1.140806248  | 0.190053789  | 0.250036591 | 0.472727686 |
| M10   | serine                                             | Amino Acid                        | Glycine, Serine and Threonine Metabolism              | 0.924011975  | -0.114016547 | 0.250943573 | 0.472727686 |
| M2731 | 1-arachidonoyl-GPI* (20:4)*                        | Lipid                             | Lysophospholipid                                      | 0.916900849  | -0.125162361 | 0.25148822  | 0.472319181 |
| M2262 | 1-myristoyl-2-palmitoyl-GPC (14:0/16:0)            | Lipid                             | Phosphatidylcholine (PC)                              | 0.846923379  | -0.239696639 | 0.252454013 | 0.473139209 |
| M3326 | cortolone glucuronide (1)                          | Lipid                             | Corticosteroids                                       | 1.213822097  | 0.279556699  | 0.254436774 | 0.475891002 |
| M573  | cysteine-glutathione disulfide                     | Amino Acid                        | Glutathione Metabolism                                | 0.579797959  | -0.78637784  | 0.256658516 | 0.479060762 |
| M2201 | myo-inositol                                       | Lipid                             | Inositol Metabolism                                   | 0.811334101  | -0.301631967 | 0.261768334 | 0.485581202 |
| M508  | N-delta-acetylmethionine                           | Amino Acid                        | Urea cycle; Arginine and Proline Metabolism           | 0.726679597  | -0.372079526 | 0.262009231 | 0.485581202 |
| M2940 | oleoyl-arachidonoyl-glycerol (18:1/20:4) [2]*      | Lipid                             | Diacylglycerol                                        | 0.855880697  | -0.224518385 | 0.261203473 | 0.485581202 |
| M3122 | spingomyelin (d18:1/20:1, d18:2/20:0)*             | Lipid                             | Sphingomyelins                                        | 0.936163872  | -0.095167005 | 0.262288636 | 0.485581202 |
| M1837 | picolinoylglycine                                  | Lipid                             | Fatty Acid Metabolism (Acyl Glycine)                  | 0.843160033  | -0.246121612 | 0.262874888 | 0.485677384 |
| M1968 | 2-hydroxypalmitate                                 | Lipid                             | Fatty Acid, Monohydroxy                               | 1.07444998   | 0.103598321  | 0.265422582 | 0.48938971  |
| M1856 | cis-3,4-methyleneheptanoylcarnitine                | Lipid                             | Fatty Acid Metabolism (Acyl Carnitine, Medium Chain)  | 1.114552363  | 0.156464397  | 0.266541836 | 0.490458561 |
| M3106 | behenoyl spingomyelin (d18:1/22:0)*                | Lipid                             | Sphingomyelins                                        | 0.935792353  | -0.095739655 | 0.269244532 | 0.494430867 |
| M2933 | linoleoyl-linolenoyl-glycerol (18:2/18:3) [1]*     | Lipid                             | Diacylglycerol                                        | 1.414036098  | 0.49981895   | 0.272064546 | 0.498602162 |
| M2539 | 1-palmitoyl-2-arachidonoyl-GPI (16:0/20:4)*        | Lipid                             | Phosphatidylinositol (PI)                             | 0.843412411  | -0.245689844 | 0.274503414 | 0.501628888 |
| M1160 | Fibrinopeptide A (4-15)                            | Peptide                           | Fibrinogen Cleavage Peptide                           | 1.218965023  | 0.285656729  | 0.274819787 | 0.501628888 |
| M1187 | phenylacetylglutamine                              | Peptide                           | Acetylated Peptides                                   | 0.778475114  | -0.361277175 | 0.27621029  | 0.503140226 |
| M642  | gamma-glutamylmethionine                           | Peptide                           | Gamma-glutamyl Amino Acid                             | 0.867121701  | -0.205693604 | 0.277515329 | 0.504522869 |
| M4369 | gamma-CEHC glucuronide*                            | Cofactors and Vitamins            | Tocopherol Metabolism                                 | 1.36650641   | 0.450492228  | 0.280198596 | 0.506166241 |
| M1451 | malate                                             | Energy                            | TCA Cycle                                             | 1.138717193  | 0.18740949   | 0.279885858 | 0.506166241 |
| M4593 | theophylline                                       | Xenobiotics                       | Xanthine Metabolism                                   | 0.787201889  | -0.345194412 | 0.280646529 | 0.506166241 |
| M4584 | 2-methoxyhydroquinone sulfate (1)                  | Xenobiotics                       | Benzoate Metabolism                                   | 0.2777564339 | -0.458456735 | 0.279001698 | 0.506166241 |
| M1572 | dihomoclenolate (20:3n3 or 3n6)                    | Lipid                             | Long Chain Polyunsaturated Fatty Acid (n3 and n6)     | 1.113642243  | 0.155285842  | 0.283699074 | 0.508382788 |
| M426  | isobutyrylcarnitine (C4)                           | Amino Acid                        | Leucine, Isoleucine and Valine Metabolism             | 0.829766435  | -0.269222795 | 0.282994159 | 0.508382788 |
| M2914 | palmitoyl-arachidonoyl-glycerol (16:0/20:4) [2]*   | Lipid                             | Diacylglycerol                                        | 0.848319242  | -0.237320809 | 0.286301251 | 0.513309343 |
| M487  | ornithine                                          | Amino Acid                        | Urea cycle; Arginine and Proline Metabolism           | 0.912326725  | -0.132377517 | 0.290255636 | 0.51937475  |
| M638  | gamma-glutamylisoleucine                           | Peptide                           | Gamma-glutamyl Amino Acid                             | 0.895076939  | -0.159916396 | 0.292763123 | 0.522832374 |
| M1750 | 2-aminohexanoate                                   | Lipid                             | Fatty Acid, Amino                                     | 0.873932417  | -0.194406377 | 0.294359405 | 0.524652351 |
| M1566 | hexadecadienoate (16:2n6)                          | Lipid                             | Long Chain Polyunsaturated Fatty Acid (n3 and n6)     | 1.126113732  | 0.171352539  | 0.295389504 | 0.525458042 |
| M6417 | glycine conjugate of C10H12O2*                     | Partially Characterized Molecules | Partially Characterized Molecules                     | 1.212319581  | 0.277770059  | 0.296450282 | 0.526315052 |
| M1372 | galactonate                                        | Carbohydrate                      | Fructose, Mannose and Galactose Metabolism            | 0.741339479  | -0.431793753 | 0.297420181 | 0.526362847 |
| M43   | hydroxyparagine                                    | Amino Acid                        | Alanine and Aspartate Metabolism                      | 0.919531303  | -0.121029406 | 0.298214374 | 0.526362847 |
| M387  | N-acetylisoleucine                                 | Amino Acid                        | Leucine, Isoleucine and Valine Metabolism             | 0.858982544  | -0.219299281 | 0.298183199 | 0.526362847 |
| M4325 | N1-Methyl-4-pyridone-3-carboxamide                 | Cofactors and Vitamins            | Nicotinate and Nicotinamide Metabolism                | 0.708876262  | -0.496394276 | 0.299177792 | 0.527040173 |
| M2913 | palmitoyl-arachidonoyl-glycerol (16:0/20:4) [1]*   | Lipid                             | Diacylglycerol                                        | 0.858388931  | -0.220296623 | 0.299998125 | 0.527462855 |
| M2037 | 3,4-dihydroxybutyrate                              | Lipid                             | Fatty Acid, Dihydroxy                                 | 0.89774944   | -0.155615246 | 0.300801872 | 0.527855022 |
| M1575 | adrenate (22:4n6)                                  | Lipid                             | Long Chain Polyunsaturated Fatty Acid (n3 and n6)     | 1.148329074  | 0.199536131  | 0.301908892 | 0.528776845 |
| M1958 | alpha-hydroxycaproate                              | Lipid                             | Fatty Acid, Monohydroxy                               | 1.373970933  | 0.458351483  | 0.304345145 | 0.530997576 |
| M564  | guanidinosuccinate                                 | Amino Acid                        | Guanidino and Acetamidio Metabolism                   | 1.272442421  | 0.347600375  | 0.304165855 | 0.530997576 |
| M399  | 2-methylbutyrylglycine (C5)                        | Amino Acid                        | Leucine, Isoleucine and Valine Metabolism             | 0.817621002  | -0.2911312   | 0.305799992 | 0.531495589 |
| M1907 | adipoylcarnitine (C6-DC)                           | Lipid                             | Fatty Acid Metabolism (Acyl Carnitine, Dicarboxylate) | 1.270181034  | 0.345034133  | 0.305215804 | 0.531495589 |
| M2447 | 1-oleoyl-2-arachidonoyl-GPE (18:1/20:4)*           | Lipid                             | Phosphatidylethanolamine (PE)                         | 1.102018828  | 0.140148872  | 0.308281389 | 0.534785844 |
| M4139 | AMP                                                | Nucleotide                        | Purine Metabolism, Adenine containing                 | 1.039456843  | 0.055829861  | 0.310435522 | 0.53701451  |
| M3129 | spingomyelin (d18:1/24:1, d18:2/24:0)*             | Lipid                             | Sphingomyelins                                        | 1.058135421  | 0.081524277  | 0.31074767  | 0.53701451  |
| M4206 | dihydroorotate                                     | Nucleotide                        | Pyrimidine Metabolism, Orotate containing             | 0.701997941  | -0.510462118 | 0.312059282 | 0.538257851 |
| M3159 | 4-hydroxyphenylacetate                             | Amino Acid                        | Phenylalanine Metabolism                              | 1.392371944  | 0.475446469  | 0.312420012 | 0.539550412 |
| M3310 | tetrahydrocortisol glucuronide                     | Lipid                             | Corticosteroids                                       | 1.265581463  | 0.339800374  | 0.317717946 | 0.545946338 |
| M1556 | 2-hydroxyphenylacetate                             | Amino Acid                        | Phenylalanine Metabolism                              | 1.229846599  | 0.284878376  | 0.318925267 | 0.546986921 |
| M2852 | 1-palmitoleylglycerol (16:1)*                      | Lipid                             | Monocacylglycerol                                     | 0.661951778  | -0.595201972 | 0.322488471 | 0.547196731 |
| M2014 | 13-HODE + 9-HODE                                   | Lipid                             | Fatty Acid, Monohydroxy                               | 1.11368756   | 0.155344548  | 0.323499985 | 0.547196731 |
| M3248 | 17alpha-hydroxypregnanolone glucuronide            | Lipid                             | Pregnenolone Steroids                                 | 1.192230808  | 0.253663559  | 0.324549507 | 0.547196731 |
| M6160 | 2-acrylamidoglycolic acid                          | Xenobiotics                       | Chemical                                              | 0.929857623  | -0.104918263 | 0.320558567 | 0.547196731 |
| M395  | 2-hydroxy-3-methylvalerate                         | Amino Acid                        | Leucine, Isoleucine and Valine Metabolism             | 1.440427219  | 0.189574378  | 0.324494817 | 0.547196731 |
| M1679 | azelate (C9-DC)                                    | Lipid                             | Fatty Acid, Dicarboxylate                             | 0.884850605  | -0.154488905 | 0.327434375 | 0.547196731 |
| M4411 | biliverdin                                         | Cofactors and Vitamins            | Hemoglobin and Porphyrin Metabolism                   | 1.179617708  | 0.238319385  | 0.326778023 | 0.547196731 |
| M3453 | cholate                                            | Lipid                             | Primary Bile Acid Metabolism                          | 1.652060829  | 0.724266808  | 0.327475272 | 0.547196731 |
| M332  | leucine                                            | Amino Acid                        | Leucine, Isoleucine and Valine Metabolism             | 0.952848436  | -0.069681343 | 0.321824264 | 0.547196731 |
| M139  | N-acetyl-2-aminoadipate                            | Amino Acid                        | Lysine Metabolism                                     | 0.890719676  | -0.166956631 | 0.31989822  | 0.547196731 |
| M435  | N-acetylmethionine                                 | Amino Acid                        | Methionine, Cysteine, SAM and Taurine Metabolism      | 1.119668079  | 0.163071114  | 0.326860485 | 0.547196731 |
| M3031 | N-palmitoyl-sphingadienine (d18:2/16:0)*           | Lipid                             | Ceramides                                             | 1.072104949  | 0.100446139  | 0.324019368 | 0.547196731 |
| M2238 | phosphoethanolamine (PE)                           | Lipid                             | Phospholipid Metabolism                               | 0.636961002  | -0.650723048 | 0.321113026 | 0.547196731 |
| M5017 | sulfate of piperine metabolite C16H19NO3 (2)*      | Xenobiotics                       | Food Component/Plant                                  | 0.725569564  | -0.462814155 | 0.326840042 | 0.547196731 |
| M2851 | 1-palmitoylglycerol (16:0)                         | Lipid                             | Monocacylglycerol                                     | 0.835370206  | -0.259512405 | 0.330237139 | 0.550799192 |
| M1709 | 2-hydroxysebacate                                  | Lipid                             | Fatty Acid, Dicarboxylate                             | 0.834883671  | -0.260352902 | 0.33100025  | 0.551060856 |
| M1844 | hexanoylcarnitine (C6)                             | Lipid                             | Fatty Acid Metabolism (Acyl Carnitine, Medium Chain)  | 1.109202158  | 0.149522329  | 0.3327399   | 0.552574677 |
| M210  | homovanillate (HVA)                                | Amino Acid                        | Tyrosine Metabolism                                   | 1.171763375  | 0.228681623  | 0.333125328 | 0.552574677 |
| M5210 | (S)-4-amino-omega-caprolactam                      | Xenobiotics                       | Food Component/Plant                                  | 0.923245216  | -0.115214213 | 0.336595276 | 0.55364877  |
| M4223 | 2'-O-methyluridine                                 | Nucleotide                        | Pyrimidine Metabolism, Uracil containing              | 1.130288406  | 0.17669094   | 0.337311109 | 0.55364877  |
| M343  | 4-methyl-2-oxopentanoate                           | Amino Acid                        | Leucine, Isoleucine and Valine Metabolism             | 1.076062671  | 0.105762104  | 0.336895384 | 0.55364877  |
| M1159 | Fibrinopeptide A (3-15)                            | Peptide                           | Fibrinogen Cleavage Peptide                           | 1.144762834  | 0.195048739  | 0.336373453 | 0.55364877  |
| M1186 | phenylacetylglutamate                              | Lipid                             | Acetylated Peptides                                   | 0.851998225  | -0.221077669 | 0.337427303 | 0.55364877  |
| M1557 | stearidonate (18:4n3)                              | Lipid                             | Long Chain Polyunsaturated Fatty Acid (n3 and n6)     | 0.846913236  | -0.239713918 | 0.337020014 | 0.55364877  |
| M4244 | 3-(3-amino-3-carboxypropyl)uridine*                | Nucleotide                        | Pyrimidine Metabolism, Uracil containing              | 0.817345412  | -0.290982201 | 0.338089347 | 0.55373525  |
| M60   | 2-pyrrolidione                                     | Amino Acid                        | Glutamate Metabolism                                  | 0.900699109  | -0.15088286  | 0.341630798 | 0.55652759  |
| M4256 | N4-acetyltyridine                                  | Nucleotide                        | Pyrimidine Metabolism, Cytidine containing            | 0.830896094  | -0.267260021 | 0.340656667 | 0.55652759  |
| M2243 | trimethylamine N-oxide                             | Lipid                             | Phospholipid Metabolism                               | 0.67220766   | -0.573021112 | 0.341348428 | 0.55652759  |
| M4905 | quinate                                            | Xenobiotics                       | Food Component/Plant                                  | 0.668083091  | -0.581900551 | 0.344355437 | 0.558962664 |
| M3001 | sphinganine-1-phosphate                            | Lipid                             | Sphingolipid Synthesis                                | 1.080644981  | 0.111892639  | 0.344027996 | 0.558962664 |
| M6152 | dimethyl sulfone                                   | Xenobiotics                       | Chemical                                              | 0.789479402  | -0.34102647  | 0.349198165 | 0.56581307  |
| M2939 | oleoyl-arachidonoyl-glycerol (18:1/20:4) [1]*      | Lipid                             | Diacylglycerol                                        | 0.884084965  | -0.177743069 | 0.351159968 | 0.567979379 |
| M81   | formiminoglutamate                                 | Amino Acid                        | Histidine Metabolism                                  | 1.148675321  | 0.19997107   | 0.352299638 | 0.568810605 |
| M2934 | linoleoyl-linolenoyl-glycerol (18:2/18:3) [2]*     | Lipid                             | Diacylglycerol                                        | 1.259898655  | 0.333307689  | 0.354838842 | 0.571894517 |
| M4470 | 4-hydroxyhippurate                                 | Xenobiotics                       | Benzoate Metabolism                                   | 0.748393178  | -0.418131687 | 0.357058628 | 0.574453615 |
| M3340 | androsterone glucuronide                           | Lipid                             | Androgenic Steroids                                   | 1.223224312  | 0.290688986  | 0.360398864 | 0.578803123 |
| M4895 | erythritol                                         | Xenobiotics                       | Food Component/Plant                                  | 0.913681812  | -0.130236258 | 0.363784122 | 0.582182688 |
| M31   | N-acetylalanine                                    | Amino Acid                        | Alanine and Aspartate Metabolism                      | 0.925359627  | -0.111913938 | 0.363202126 | 0.582182688 |
| M3219 | 4-cholesten-3-one                                  | Lipid                             | Sterol                                                | 0.926992012  | -0.109371187 | 0.365995375 | 0.584255308 |
| M6213 | 4-hydroxychlorothalonil                            | Xenobiotics                       | Chemical                                              | 0.922193656  | -0.116858354 | 0.366364715 | 0.584255308 |
| M551  | acisoga                                            | Amino Acid                        | Polyamine Metabolism                                  | 0.703850359  | -0.506659356 | 0.36772949  | 0.585404739 |
| M2857 | 1-linoleoylglycerol (18:3)                         | Lipid                             | Monocacylglycerol                                     | 0.797217119  | -0.326965177 | 0.369138735 | 0.585597051 |
| M3221 | beta-sitosterol                                    | Lipid                             | Sterol                                                | 1.360905703  | 0.444567106  | 0.368648913 | 0.585597051 |

|       |                                                                 |                                   |                                                         |             |              |             |             |
|-------|-----------------------------------------------------------------|-----------------------------------|---------------------------------------------------------|-------------|--------------|-------------|-------------|
| M1177 | Fibrinopeptide B (1-9)                                          | Peptide                           | Fibrinogen Cleavage Peptide                             | 1.219667732 | 0.286488175  | 0.39046656  | 0.609129304 |
| M4119 | inosine                                                         | Nucleotide                        | Purine Metabolism, (Hypo)Xanthine/Inosine containing    | 0.697475382 | -0.519785798 | 0.392910811 | 0.611568368 |
| M2310 | 1-palmitoleyl-2-linolenoyl-GPC (16:1/18:3)*                     | Lipid                             | Phosphatidylcholine (PC)                                | 0.898404737 | -0.15456256  | 0.396571849 | 0.615160087 |
| M4938 | indolin-2-one                                                   | Xenobiotics                       | Food Component/Plant                                    | 0.785957561 | -0.347476682 | 0.39609123  | 0.615160087 |
| M6401 | glutamine conjugate of C7H12O2*                                 | Partially Characterized Molecules | Partially Characterized Molecules                       | 1.187866514 | 0.248372722  | 0.399102089 | 0.616979749 |
| M3057 | glycosyl-N-palmitoyl-sphingosine (d18:1/16:0)                   | Lipid                             | Hexosylceramides (HCEr)                                 | 0.904139739 | -0.14538233  | 0.398457248 | 0.616979749 |
| M2855 | 1-oleoylglycerol (18:1)                                         | Lipid                             | Monooacylglycerol                                       | 0.799577937 | -0.322689431 | 0.40211107  | 0.620183869 |
| M2869 | 2-palmitoleoylglycerol (16:1)*                                  | Lipid                             | Monooacylglycerol                                       | 0.68383891  | -0.548271581 | 0.403583824 | 0.620183869 |
| M1990 | 3-hydroxyoleate*                                                | Lipid                             | Fatty Acid, Monohydroxy                                 | 1.128052378 | 0.173834057  | 0.403904126 | 0.620183869 |
| M1918 | octadecenediolkarnitine (C18:1-DC)*                             | Lipid                             | Fatty Acid Metabolism (Acyl Carnitine, Dicarboxylate)   | 1.193578464 | 0.25529341   | 0.403070605 | 0.620183869 |
| M2429 | 1-stearoyl-2-linoleoyl-GPE (18:0/18:2)*                         | Lipid                             | Phosphatidylethanolamine (PE)                           | 1.03931192  | 0.129496579  | 0.408413992 | 0.623614276 |
| M4235 | 2'-deoxyuridine                                                 | Nucleotide                        | Pyrimidine Metabolism, Uracil containing                | 0.646655287 | -0.629132041 | 0.406850054 | 0.623614276 |
| M1831 | 3-hydroxybutyrylglycine                                         | Lipid                             | Fatty Acid Metabolism (Acyl Glycine)                    | 1.159340772 | 0.213304688  | 0.408882408 | 0.623614276 |
| M1989 | 3-hydroxystearate                                               | Lipid                             | Fatty Acid, Monohydroxy                                 | 1.15891624  | 0.258086653  | 0.408690882 | 0.623614276 |
| M1929 | 3-hydroxyoleoylcarnitine                                        | Lipid                             | Fatty Acid Metabolism (Acyl Carnitine, Hydroxy)         | 0.858853151 | -0.219516618 | 0.409824168 | 0.624003632 |
| M3051 | ceramide (d16:1/24:1, d18:1/22:1)*                              | Lipid                             | Ceramides                                               | 1.080963045 | 0.112317202  | 0.410905666 | 0.624604097 |
| M3116 | sphingomyelin (d17:2/16:0, d18:2/15:0)*                         | Lipid                             | Sphingomyelins                                          | 0.913117085 | -0.131128232 | 0.412621235 | 0.626164779 |
| M3271 | Salpha-pregnan-3beta,20beta-diol monosulfate (1)                | Lipid                             | Progesterin Steroids                                    | 1.262882288 | 0.336720173  | 0.415046595 | 0.628795592 |
| M76   | N-acetyl-1-methylhistidine*                                     | Amino Acid                        | Histidine Metabolism                                    | 0.729303151 | -0.455409467 | 0.417575138 | 0.631573712 |
| M1531 | 10-heptadecenoate (17:1n7)                                      | Lipid                             | Long Chain Monounsaturated Fatty Acid                   | 1.107097331 | 0.146782063  | 0.420393085 | 0.634779592 |
| M11   | N-acetyserine                                                   | Amino Acid                        | Glycine, Serine and Threonine Metabolism                | 0.890862912 | -0.166724652 | 0.422125649 | 0.636338665 |
| M146  | 1-carboxyethylphenylalanine                                     | Amino Acid                        | Phenylalanine Metabolism                                | 0.861561287 | -0.21497467  | 0.424187011 | 0.63733222  |
| M2297 | 1-palmitoyl-2-arachidonoyl-GPC (16:0/20:4n6)                    | Lipid                             | Phosphatidylcholine (PC)                                | 0.957898222 | -0.062055718 | 0.423732673 | 0.63733222  |
| M1325 | sucrose                                                         | Carbohydrate                      | Disaccharides and Oligosaccharides                      | 0.56603174  | -0.821045141 | 0.427130437 | 0.640695655 |
| M3380 | Salpha-androstan-3alpha,17beta-diol disulfate                   | Lipid                             | Androgenic Steroids                                     | 0.712115594 | -0.491641137 | 0.431688907 | 0.644966837 |
| M6428 | carnitine of C10H14O2 (5)*                                      | Partially Characterized Molecules | Partially Characterized Molecules                       | 1.093888758 | 0.129466033  | 0.432579384 | 0.644966837 |
| M5224 | ethyl beta-glucopyranoside                                      | Xenobiotics                       | Food Component/Plant                                    | 0.764684797 | -0.387062903 | 0.431171122 | 0.644966837 |
| M282  | picolinate                                                      | Amino Acid                        | Tryptophan Metabolism                                   | 1.12818053  | 0.173997944  | 0.433217718 | 0.644966837 |
| M2999 | 3-ketosphinganine                                               | Lipid                             | Sphingolipid Synthesis                                  | 0.658192989 | -0.603417437 | 0.433525564 | 0.644966837 |
| M6    | dimethylglycine                                                 | Amino Acid                        | Glycine, Serine and Threonine Metabolism                | 0.911125246 | -0.134278711 | 0.435198975 | 0.646398478 |
| M1563 | docosahexaenoate (DHA; 22:6n3)                                  | Lipid                             | Long Chain Polyunsaturated Fatty Acid (n3 and n6)       | 1.069833575 | 0.097386387  | 0.438172001 | 0.64870178  |
| M6400 | glutamine conjugate of C6H10O2 (2)*                             | Partially Characterized Molecules | Partially Characterized Molecules                       | 1.18836132  | 0.248973553  | 0.438890643 | 0.64870178  |
| M1510 | palmitate (16:0)                                                | Lipid                             | Long Chain Saturated Fatty Acid                         | 1.065998677 | 0.092205647  | 0.438412152 | 0.64870178  |
| M2416 | 1-palmitoyl-2-arachidonoyl-GPE (16:0/20:4)*                     | Lipid                             | Phosphatidylethanolamine (PE)                           | 1.070342947 | 0.098073123  | 0.442017566 | 0.652262934 |
| M62   | 5-1-pyrroline-5-carboxylate                                     | Amino Acid                        | Glutamate Metabolism                                    | 0.934532174 | -0.097683761 | 0.444782649 | 0.655279462 |
| M5064 | 3-hydroxystachydrine*                                           | Xenobiotics                       | Food Component/Plant                                    | 0.71472584  | -0.484538147 | 0.450486884 | 0.661538898 |
| M1189 | 4-hydroxyphenylacetylglutamine                                  | Peptide                           | Acetylated Peptides                                     | 1.380484682 | 0.46517488   | 0.450409906 | 0.661538898 |
| M3502 | taurothiocholate 3-sulfate                                      | Lipid                             | Secondary Bile Acid Metabolism                          | 1.256610221 | 0.329537207  | 0.452118109 | 0.662863486 |
| M3159 | sphingosine                                                     | Lipid                             | Sphingosines                                            | 0.644840335 | -0.632986107 | 0.453712036 | 0.664129212 |
| M1921 | 3-hydroxyhexanoylcarnitine (1)                                  | Lipid                             | Fatty Acid Metabolism (Acyl Carnitine, Hydroxy)         | 1.12718848  | 0.173278772  | 0.456315916 | 0.665796417 |
| M1688 | dodecanedioate (C12-1-DC)*                                      | Lipid                             | Fatty Acid, Dicarboxylate                               | 0.896969402 | -0.156869324 | 0.456044204 | 0.665796417 |
| M1560 | eicosapentaenoate (EPA; 20:5n3)                                 | Lipid                             | Long Chain Polyunsaturated Fatty Acid (n3 and n6)       | 1.098179606 | 0.135114025  | 0.464244739 | 0.676279596 |
| M4368 | gamma-CEHC                                                      | Cofactors and Vitamins            | Tocopherol Metabolism                                   | 1.170350379 | 0.226940508  | 0.471432342 | 0.685651198 |
| M3119 | sphingomyelin (d18:1/18:1, d18:2/18:0)                          | Lipid                             | Sphingomyelins                                          | 0.956605421 | -0.064004128 | 0.472735454 | 0.686448127 |
| M3363 | androstenediol (3beta,17beta) disulfate (1)                     | Lipid                             | Androgenic Steroids                                     | 0.858790849 | -0.219621276 | 0.474333227 | 0.686574686 |
| M1917 | octadecenediolkarnitine (C18-DC)*                               | Lipid                             | Fatty Acid Metabolism (Acyl Carnitine, Dicarboxylate)   | 1.144747541 | 0.195029466  | 0.473899079 | 0.686574686 |
| M1980 | 3-hydroxyoctanoate                                              | Lipid                             | Fatty Acid, Monohydroxy                                 | 1.091400275 | 0.126180312  | 0.480861658 | 0.686622566 |
| M3050 | ceramide (d18:1/20:0, d16:1/22:0, d20:1/18:0)*                  | Lipid                             | Ceramides                                               | 1.057656094 | 0.080870598  | 0.480383392 | 0.686622566 |
| M1439 | citrate                                                         | Energy                            | TCA Cycle                                               | 1.063519451 | 0.08884642   | 0.480599849 | 0.686622566 |
| M1431 | erythronate*                                                    | Carbohydrate                      | Aminosugar Metabolism                                   | 0.938433639 | -0.091673366 | 0.478971502 | 0.686622566 |
| M141  | N-acetylphenylalanine                                           | Amino Acid                        | Phenylalanine Metabolism                                | 1.112549171 | 0.153869099  | 0.477768721 | 0.686622566 |
| M109  | N2-acetyl,N6-methyllysine                                       | Amino Acid                        | Lysine Metabolism                                       | 0.763313958 | -0.389651521 | 0.47556662  | 0.686622566 |
| M3099 | palmitoyl dihydrosgingomyelin (d18:0/16:0)*                     | Lipid                             | Dihydrosgingomyelins                                    | 0.960628891 | -0.057948896 | 0.477728394 | 0.686622566 |
| M4437 | retinal                                                         | Cofactors and Vitamins            | Vitamin A Metabolism                                    | 0.840936033 | -0.249932031 | 0.481446681 | 0.686622566 |
| M1550 | tetradecadienoate (14:2)*                                       | Lipid                             | Long Chain Polyunsaturated Fatty Acid (n3 and n6)       | 1.103619613 | 0.142243001  | 0.481919909 | 0.686622566 |
| M1691 | tetradecanediato (C14)                                          | Lipid                             | Fatty Acid, Dicarboxylate                               | 1.107537078 | 0.147355     | 0.476364912 | 0.686622566 |
| M1430 | N-acetylglucosaminylasparagine                                  | Carbohydrate                      | Aminosugar Metabolism                                   | 0.931660646 | -0.10212354  | 0.484969261 | 0.689885849 |
| M327  | 6-bromotryptophan                                               | Amino Acid                        | Tryptophan Metabolism                                   | 0.821638266 | -0.283424721 | 0.490702466 | 0.691626052 |
| M1703 | eicosenedioate (C20:1-DC)*                                      | Lipid                             | Fatty Acid, Dicarboxylate                               | 1.05316475  | 0.07473114   | 0.487514004 | 0.691626052 |
| M3461 | glycochenodeoxycholate                                          | Lipid                             | Primary Bile Acid Metabolism                            | 1.118931623 | 0.162121877  | 0.491518625 | 0.691626052 |
| M1891 | linoleoylcarnitine (C18:2)*                                     | Lipid                             | Fatty Acid Metabolism (Acyl Carnitine, Polyunsaturated) | 1.075270629 | 0.10469981   | 0.487768519 | 0.691626052 |
| M1526 | mystroleate (14:1n5)                                            | Lipid                             | Long Chain Monounsaturated Fatty Acid                   | 1.101898412 | 0.139991222  | 0.491181182 | 0.691626052 |
| M18   | N-acetylthreonine                                               | Amino Acid                        | Glycine, Serine and Threonine Metabolism                | 0.935332917 | -0.096448134 | 0.489620987 | 0.691626052 |
| M3283 | pregnanediol-3-glucuronide                                      | Lipid                             | Progesterin Steroids                                    | 1.133155364 | 0.180346799  | 0.494940416 | 0.691626052 |
| M3032 | N-stearoyl-sphingandine (d18:2/18:0)*                           | Lipid                             | Ceramides                                               | 1.061014084 | 0.085433807  | 0.503061032 | 0.707532167 |
| M4382 | gamma-tocopherol/beta-tocopherol                                | Cofactors and Vitamins            | Tocopherol Metabolism                                   | 1.098118373 | 0.13053579   | 0.506070301 | 0.708810329 |
| M3105 | stearoyl sphingomyelin (d18:1/18:0)                             | Lipid                             | Sphingomyelins                                          | 0.96340082  | -0.053791943 | 0.505940479 | 0.708810329 |
| M512  | N-methylsphingoprolin                                           | Amino Acid                        | Urea cycle; Arginine and Proline Metabolism             | 0.738299793 | -0.437721341 | 0.510234563 | 0.713543412 |
| M4432 | carotene diol (2)                                               | Cofactors and Vitamins            | Vitamin A Metabolism                                    | 0.920411767 | -0.119648667 | 0.514551035 | 0.718474487 |
| M2866 | 1-docosahexaenoylglycerol (22:6)                                | Lipid                             | Monooacylglycerol                                       | 0.87489781  | -0.192813578 | 0.516306597 | 0.718567681 |
| M4283 | 3-aminoisobutyrate                                              | Nucleotide                        | Pyrimidine Metabolism, Thymine containing               | 1.300254577 | 0.378794116  | 0.516076278 | 0.718567681 |
| M4251 | cytidine                                                        | Nucleotide                        | Pyrimidine Metabolism, Cytidine containing              | 0.885736997 | -0.175049713 | 0.516989289 | 0.718567681 |
| M498  | dimethylarginine (ADMA + SDMA)                                  | Amino Acid                        | Urea cycle; Arginine and Proline Metabolism             | 0.89796636  | -0.155266696 | 0.520995815 | 0.723030833 |
| M397  | 2-methylbutyrylcarnitine (C5)                                   | Amino Acid                        | Leucine, Isoleucine and Valine Metabolism               | 1.136063469 | 0.184043437  | 0.525279182 | 0.725956015 |
| M2033 | 2S,3R-dihydroxybutyrate                                         | Lipid                             | Fatty Acid, Dihydroxy                                   | 1.085602271 | 0.118495644  | 0.525373184 | 0.725956015 |
| M6259 | 3,5-dichloro-2,6-dihydroxybenzoic acid                          | Xenobiotics                       | Chemical                                                | 0.943338393 | -0.08415271  | 0.526298145 | 0.725956015 |
| M1509 | pentadecanoate (15:0)                                           | Lipid                             | Long Chain Saturated Fatty Acid                         | 1.068183631 | 0.095159681  | 0.526116827 | 0.725956015 |
| M2278 | 1,2-dipalmitoyl-GPC (16:0/16:0)                                 | Lipid                             | Phosphatidylcholine (PC)                                | 1.047448835 | 0.066879775  | 0.540845687 | 0.743765097 |
| M4785 | 3-formylindole                                                  | Xenobiotics                       | Food Component/Plant                                    | 0.936846931 | -0.094114745 | 0.540500732 | 0.743765097 |
| M1445 | alpha-ketoglutarate                                             | Energy                            | TCA Cycle                                               | 1.064075487 | 0.089600501  | 0.544997638 | 0.747213957 |
| M6443 | bilirubin degradation product, C16H18N2O5 (1)                   | Partially Characterized Molecules | Partially Characterized Molecules                       | 1.194848406 | 0.256827591  | 0.544300838 | 0.747213957 |
| M2841 | glycerol                                                        | Lipid                             | Glycerolipid Metabolism                                 | 0.925926802 | -0.111029948 | 0.54952305  | 0.752283814 |
| M1519 | behenate (22:0)*                                                | Lipid                             | Long Chain Saturated Fatty Acid                         | 1.065113888 | 0.0910077    | 0.553481027 | 0.756562788 |
| M4238 | 3-ureidopropionate                                              | Nucleotide                        | Pyrimidine Metabolism, Uracil containing                | 1.161358158 | 0.215812962  | 0.559596207 | 0.757264719 |
| M51   | 4-hydroxyglutamate                                              | Amino Acid                        | Glutamate Metabolism                                    | 1.065498557 | 0.091528639  | 0.559826063 | 0.757264719 |
| M1573 | arachidonate (20:4n6)                                           | Lipid                             | Long Chain Polyunsaturated Fatty Acid (n3 and n6)       | 1.061328252 | 0.085870928  | 0.557813396 | 0.757264719 |
| M4410 | bilirubin (E,Z or Z,E)*                                         | Cofactors and Vitamins            | Hemoglobin and Porphyrin Metabolism                     | 0.921229309 | -0.118367783 | 0.558174477 | 0.757264719 |
| M4433 | carotene diol (3)                                               | Cofactors and Vitamins            | Vitamin A Metabolism                                    | 0.907811785 | -0.139534877 | 0.559224131 | 0.757264719 |
| M528  | creatine                                                        | Amino Acid                        | Creatine Metabolism                                     | 1.133895225 | 0.181287338  | 0.559562298 | 0.757264719 |
| M4544 | methyl-4-hydroxybenzoate sulfate                                | Xenobiotics                       | Benzoate Metabolism                                     | 0.769688574 | -0.377653264 | 0.555516128 | 0.757264719 |
| M518  | N-methylproline                                                 | Amino Acid                        | Urea cycle; Arginine and Proline Metabolism             | 0.801154059 | -0.3198484   | 0.561336039 | 0.757354372 |
| M2915 | palmitoleyl-arachidonoyl-glycerol (16:1/20:4) [2]*              | Lipid                             | Diacylglycerol                                          | 0.854520668 | -0.226812708 | 0.561558687 | 0.757354372 |
| M2410 | 1-palmitoyl-2-linoleoyl-GPE (16:0/18:2)                         | Lipid                             | Phosphatidylethanolamine (PE)                           | 1.065455785 | 0.091470724  | 0.563877607 | 0.757801951 |
| M2339 | 1-stearoyl-2-docosahexaenoyl-GPC (18:0/22:6)                    | Lipid                             | Phosphatidylcholine (PC)                                | 1.032286487 | 0.045843412  | 0.56275753  | 0.757801951 |
| M554  | N1,N12-diacetylspermine                                         | Amino Acid                        | Polyamine Metabolism                                    | 0.716544284 | -0.480872227 | 0.564391552 | 0.757801951 |
| M2286 | 1-palmitoyl-2-linoleoyl-GPC (16:0/18:2)                         | Lipid                             | Phosphatidylcholine (PC)                                | 0.97818929  | -0.031814425 | 0.567161327 | 0.758220314 |
| M1960 | 2-hydroxyoctanoate                                              | Lipid                             | Fatty Acid, Monohydroxy                                 | 1.128635841 | 0.285267077  | 0.567205516 | 0.758220314 |
| M120  | 5-(galactosylhydroxy)-L-lysine                                  | Amino Acid                        | Lysine Metabolism                                       | 0.933111467 | -0.098978662 | 0.567047203 | 0.758220314 |
| M6422 | metablonic lactone sulfate                                      | Partially Characterized Molecules | Partially Characterized Molecules                       | 1.117872686 | 0.16075589   | 0.569355192 | 0.759976314 |
| M6433 | branched-chain, straight-chain, or cyclopropyl 12:1 fatty acid* | Partially Characterized Molecules | Partially Characterized Molecules                       | 1.078032162 | 0.10840022   | 0.576197388 | 0.765629357 |
| M3047 | ceramide (d18:1/14:0, d16:1/16:0)*                              | Lipid                             | Ceramides                                               | 0.951462819 | -0.071780815 | 0.576942629 | 0.765629357 |
| M4805 | gluconate                                                       | Xenobiotics                       | Food Component/Plant                                    | 0.784102497 | -0.350885842 | 0.575727706 | 0.765629357 |
| M267  | kynurenine                                                      | Amino Acid                        | Tryptophan Metabolism                                   | 1.063646995 | 0.089019426  | 0.576959416 | 0.765629357 |
| M4592 | theobromine                                                     | Xenobiotics                       | Xanthine Metabolism                                     | 0.869768716 | -0.201296277 | 0.580286318 | 0.768921667 |
| M1924 | 3-hydroxyoctanoylcarnitine (1)                                  | Lipid                             | Fatty Acid Metabolism (Acyl Carnitine, Hydroxy)         | 1.075826717 | 0.105445722  | 0.581891291 | 0.769926032 |
| M347  | alpha-hydroxyisocaproate                                        | Amino Acid                        | Leucine, Isoleucine and Valine Metabolism               | 0.954749273 | -0.066806178 | 0.584224029 | 0.771669131 |
| M275  | anthranilate                                                    | Amino Acid                        | Tryptophan Metabolism                                   | 1.095978702 | 0.132219763  | 0.584906525 | 0.771669131 |

|       |                                                        |                                   |                                                              |              |              |             |             |
|-------|--------------------------------------------------------|-----------------------------------|--------------------------------------------------------------|--------------|--------------|-------------|-------------|
| M2868 | 2-palmitoylglycerol (16:0)                             | Lipid                             | Monooacylglycerol                                            | 0.903064865  | -0.147098478 | 0.603619748 | 0.782382568 |
| M410  | methylsuccinate                                        | Amino Acid                        | Leucine, Isoleucine and Valine Metabolism                    | 0.933693591  | -0.098978915 | 0.604216241 | 0.782382568 |
| M3000 | sphinganine                                            | Lipid                             | Sphingolipid Synthesis                                       | 0.728558545  | -0.456883188 | 0.607576188 | 0.784564251 |
| M3110 | sphingomyelin (d18:2/23:1)*                            | Lipid                             | Sphingomyelins                                               | 0.96505936   | -0.05131041  | 0.607627319 | 0.784564251 |
| M3514 | glycoursodeoxycholate                                  | Lipid                             | Secondary Bile Acid Metabolism                               | 1.412141021  | 0.497884168  | 0.608884371 | 0.785036363 |
| M4153 | 1-methyladenosine                                      | Nucleotide                        | Purine Metabolism, Adenine containing                        | 1.070400287  | 0.098150407  | 0.609720212 | 0.785036363 |
| M3012 | N-stearoyl-sphinganine (d18:0/18:0)*                   | Lipid                             | Dihydroceramides                                             | 1.074233648  | 0.103307817  | 0.613607337 | 0.788923719 |
| M3339 | 16a-hydroxy DHEA 3-sulfate                             | Lipid                             | Androgenic Steroids                                          | 0.880134789  | -0.184203612 | 0.614516384 | 0.788976544 |
| M466  | lanthionine                                            | Amino Acid                        | Methionine, Cysteine, SAM and Taurine Metabolism             | 1.048255276  | 0.067990091  | 0.615787938 | 0.789493986 |
| M2926 | oleoyl-linoleoyl-glycerol (18:1/18:2) [1]              | Lipid                             | Diacylglycerol                                               | 1.057069292  | 0.08006995   | 0.619798841 | 0.793517108 |
| M2582 | 1-palmitoyl-GPA (16:0)                                 | Lipid                             | Lysophospholipid                                             | 0.926543457  | -0.110069451 | 0.62484922  | 0.796877781 |
| M1663 | 2-hydroxyglutarate                                     | Lipid                             | Fatty Acid, Dicarboxylate                                    | 1.287270716  | 0.36424842   | 0.625053749 | 0.796877781 |
| M417  | N-acetylvaline                                         | Amino Acid                        | Leucine, Isoleucine and Valine Metabolism                    | 0.952379777  | -0.070454429 | 0.624300308 | 0.796877781 |
| M4152 | N2,N2-dimethylguanosine                                | Nucleotide                        | Purine Metabolism, Guanine containing                        | 1.066072394  | 0.092305411  | 0.626049922 | 0.80003448  |
| M4525 | 4-vinylphenol sulfate                                  | Xenobiotics                       | Benzoate Metabolism                                          | 0.81334097   | -0.298067807 | 0.626050507 | 0.80078935  |
| M3364 | androstenediol (3beta,17beta) disulfate (2)            | Lipid                             | Androgenic Steroids                                          | 0.941533888  | -0.086915073 | 0.632871407 | 0.80078935  |
| M3350 | androstosterone sulfate                                | Lipid                             | Androgenic Steroids                                          | 0.905120578  | -0.143818097 | 0.635911674 | 0.80078935  |
| M4959 | mannonate*                                             | Xenobiotics                       | Food Component/Plant                                         | 1.04966353   | 0.069926946  | 0.635495831 | 0.80078935  |
| M255  | N-acetyltryptophan                                     | Amino Acid                        | Tryptophan Metabolism                                        | 0.937919201  | -0.092464451 | 0.633223756 | 0.80078935  |
| M116  | N6,N6,6-trimethyllysine                                | Amino Acid                        | Lysine Metabolism                                            | 0.944310895  | -0.082666179 | 0.630358847 | 0.80078935  |
| M4335 | pantoate                                               | Cofactors and Vitamins            | Pantothenate and CoA Metabolism                              | 1.111277306  | 0.152218869  | 0.63436511  | 0.80078935  |
| M3115 | sphingomyelin (d17:1/16:0, d18:1/15:0, d16:1/17:0)*    | Lipid                             | Sphingomyelins                                               | 0.966289707  | -0.049472301 | 0.632320357 | 0.80078935  |
| M2358 | 1-oleoyl-2-docosahexaenoyl-GPC (18:1/22:6)*            | Lipid                             | Phosphatidylcholine (PC)                                     | 0.97280837   | -0.039772453 | 0.638266524 | 0.802467871 |
| M1642 | (14 or 15)-methylpalmitate (a17:0 or i17:0)            | Lipid                             | Fatty Acid, Branched                                         | 1.060950199  | 0.085356938  | 0.645550959 | 0.804599275 |
| M449  | 2-hydroxy-4-(methylthio)butanoic acid                  | Amino Acid                        | Methionine, Cysteine, SAM and Taurine Metabolism             | 0.940024022  | -0.08923047  | 0.642643505 | 0.804599275 |
| M3280 | Salpha-pregnan-3beta,20alpha-diol disulfate            | Lipid                             | Progestin Steroids                                           | 1.096251013  | 0.132578175  | 0.641666028 | 0.804599275 |
| M4186 | 7-methylguanine                                        | Nucleotide                        | Purine Metabolism, Guanine containing                        | 1.065691359  | 0.091789671  | 0.642405233 | 0.804599275 |
| M3353 | etiocholanolone glucuronide                            | Lipid                             | Androgenic Steroids                                          | 0.920230683  | -0.119932534 | 0.645243525 | 0.804599275 |
| M115  | N6,N6-dimethyllysine                                   | Amino Acid                        | Lysine Metabolism                                            | 0.839969346  | -0.251591416 | 0.643718418 | 0.804599275 |
| M1772 | propionylglycine (C3)                                  | Lipid                             | Fatty Acid Metabolism (also BCAA Metabolism)                 | 0.913578574  | -0.130399279 | 0.646157834 | 0.804599275 |
| M1698 | octadecanedioate (C18)                                 | Lipid                             | Fatty Acid, Dicarboxylate                                    | 1.055902191  | 0.078476202  | 0.64833403  | 0.806204696 |
| M448  | 2,3-dihydroxy-5-methylthio-4-pentenoate (DMPA)*        | Amino Acid                        | Methionine, Cysteine, SAM and Taurine Metabolism             | 1.040397018  | 0.05713141   | 0.64933045  | 0.806340681 |
| M1823 | N-palmitoylglycine                                     | Lipid                             | Fatty Acid Metabolism (Acyl Glycine)                         | 0.956134595  | -0.064714375 | 0.651323464 | 0.806611756 |
| M6190 | perfluorooctanesulfonate (PFOS)                        | Xenobiotics                       | Chemical                                                     | 0.915324023  | -0.127645549 | 0.650770082 | 0.806611756 |
| M6399 | glutamine conjugate of C6H10O2 (1)*                    | Partially Characterized Molecules | Partially Characterized Molecules                            | 0.917310239  | -0.124518351 | 0.652608607 | 0.807103706 |
| M33   | N,N-dimethylalanine                                    | Amino Acid                        | Alanine and Aspartate Metabolism                             | 1.160241098  | 0.214424628  | 0.657490495 | 0.809835853 |
| M538  | N-acetylputrescine                                     | Amino Acid                        | Polyamine Metabolism                                         | 1.061386566  | 0.085950193  | 0.656812099 | 0.809835853 |
| M1771 | propionylcarnitine (C3)                                | Lipid                             | Fatty Acid Metabolism (also BCAA Metabolism)                 | 0.942649496  | -0.085152329 | 0.657406146 | 0.809835853 |
| M3130 | sphingomyelin (d18:2/24:1, d18:1/24:2)*                | Lipid                             | Sphingomyelins                                               | 1.016482715  | 0.021385663  | 0.658784217 | 0.810331331 |
| M348  | 2-tetradecapalate                                      | Amino Acid                        | Leucine, Isoleucine and Valine Metabolism                    | 1.177342112  | 0.235335599  | 0.662683841 | 0.813962486 |
| M6450 | bilirubin degradation product, C16H18N2O5 (3)          | Partially Characterized Molecules | Partially Characterized Molecules                            | 1.116368161  | 0.158812826  | 0.663527175 | 0.813962486 |
| M556  | 5-methylthioadenosine (MTA)                            | Amino Acid                        | Polyamine Metabolism                                         | 1.065222442  | 0.091154729  | 0.666816496 | 0.816895142 |
| M3297 | corticosterone                                         | Lipid                             | Corticosteroids                                              | 1.089325668  | 0.123435331  | 0.674320314 | 0.823867158 |
| M1696 | hexadecanedioate (C16:1-DC)*                           | Lipid                             | Fatty Acid, Dicarboxylate                                    | 1.054855327  | 0.077045147  | 0.674293994 | 0.823867158 |
| M1163 | Fibrinopeptide A [7-16]*                               | Peptide                           | Fibrinogen Cleavage Peptide                                  | 1.049221941  | 0.069319882  | 0.679838211 | 0.829493871 |
| M71   | 1-methylhistidine                                      | Amino Acid                        | Histidine Metabolism                                         | 0.944333007  | -0.082632398 | 0.681756508 | 0.830719391 |
| M3134 | palmitoyl-sphingidine-phosphoethanolamine (d18:1/16:0) | Lipid                             | Ceramide PE                                                  | 1.018802164  | 0.026873929  | 0.685205768 | 0.833010844 |
| M476  | succinyltaurine                                        | Amino Acid                        | Methionine, Cysteine, SAM and Taurine Metabolism             | 1.105755117  | 0.145031919  | 0.685469869 | 0.833010844 |
| M107  | N6-acetyllysine                                        | Amino Acid                        | Lysine Metabolism                                            | 0.953834067  | -0.068189784 | 0.687478562 | 0.834336466 |
| M2872 | 2-linoleoylglycerol (18:2)                             | Lipid                             | Monooacylglycerol                                            | 0.915237773  | -0.1277815   | 0.691057897 | 0.837562171 |
| M1504 | 5-dodecanoate (12:1n7)                                 | Lipid                             | Medium Chain Fatty Acid                                      | 1.050852023  | 0.071559529  | 0.695339858 | 0.839528946 |
| M364  | beta-hydroxyisovaleroylcarnitine                       | Amino Acid                        | Leucine, Isoleucine and Valine Metabolism                    | 0.963256248  | -0.054008457 | 0.69608736  | 0.839528946 |
| M1449 | fumarate                                               | Energy                            | TCA Cycle                                                    | 1.064101167  | 0.06502238   | 0.69565772  | 0.839528946 |
| M427  | isobutyrylglycine (C4)                                 | Amino Acid                        | Leucine, Isoleucine and Valine Metabolism                    | 0.92728917   | -0.10890879  | 0.696374945 | 0.839528946 |
| M4239 | beta-alanine                                           | Nucleotide                        | Pyrimidine Metabolism, Uracil containing                     | 1.027826525  | 0.039596789  | 0.692496134 | 0.842483025 |
| M6451 | bilirubin degradation product, C16H18N2O5 (4)          | Partially Characterized Molecules | Partially Characterized Molecules                            | 1.100951418  | 0.138750808  | 0.700678952 | 0.842483025 |
| M1986 | 3-hydroxymyristate                                     | Lipid                             | Fatty Acid, Monohydroxy                                      | 1.047563897  | 0.067038245  | 0.703998868 | 0.844879099 |
| M1699 | octadecenedioate (C18:1-DC)                            | Lipid                             | Fatty Acid, Dicarboxylate                                    | 0.952579315  | -0.070088873 | 0.704530646 | 0.844879099 |
| M150  | phenylpyruvate                                         | Amino Acid                        | Phenylalanine Metabolism                                     | 1.056030381  | 0.07865134   | 0.706965865 | 0.84668244  |
| M272  | kyurenate                                              | Amino Acid                        | Tryptophan Metabolism                                        | 0.958265657  | -0.06150243  | 0.709669895 | 0.848802545 |
| M6260 | 3-bromo-5-chloro-2,6-dihydroxybenzoic acid*            | Xenobiotics                       | Chemical                                                     | 0.966331182  | -0.049410379 | 0.717518217 | 0.857061839 |
| M1840 | acetyl carnitine (C2)                                  | Lipid                             | Fatty Acid Metabolism (Acyl Carnitine, Short Chain)          | 1.042797033  | 0.060458383  | 0.719125221 | 0.857854102 |
| M394  | 3-methyl-2-oxovalerate                                 | Amino Acid                        | Leucine, Isoleucine and Valine Metabolism                    | 1.027308111  | 0.03886894   | 0.72478361  | 0.863470907 |
| M1562 | docosapentaenoate (DPA; 22:5n3)                        | Lipid                             | Long Chain Polyunsaturated Fatty Acid (n3 and n6)            | 1.040433469  | 0.057184714  | 0.726063259 | 0.863863223 |
| M6177 | 2,4-di-tert-butylphenol                                | Xenobiotics                       | Chemical                                                     | 0.779471781  | 0.032179514  | 0.728185108 | 0.865255246 |
| M287  | serotonin                                              | Amino Acid                        | Tryptophan Metabolism                                        | 1.093829755  | 0.139388212  | 0.730827201 | 0.867261    |
| M4349 | ascorbic acid 3-sulfate*                               | Cofactors and Vitamins            | Ascorbate and Aldarate Metabolism                            | 0.954272146  | -0.067527333 | 0.732384901 | 0.867976369 |
| M354  | isovalerylcarnitine (C5)                               | Amino Acid                        | Leucine, Isoleucine and Valine Metabolism                    | 0.95368      | -0.068422832 | 0.734095967 | 0.868872582 |
| M1852 | octanoylcarnitine (C8)                                 | Lipid                             | Fatty Acid Metabolism (Acyl Carnitine, Medium Chain)         | 0.961227453  | -0.057050242 | 0.736077658 | 0.870083994 |
| M3379 | Salpha-androstan-3alpa,17beta-diol monosulfate (2)     | Lipid                             | Androgenic Steroids                                          | 0.915737081  | -0.126994652 | 0.738193706 | 0.871452051 |
| M6447 | bilirubin degradation product, C17H18N2O4 (3)          | Partially Characterized Molecules | Partially Characterized Molecules                            | 1.056174925  | 0.078848795  | 0.743609595 | 0.876707033 |
| M579  | 5-oxoproline                                           | Amino Acid                        | Glutathione Metabolism                                       | 1.054857587  | 0.077048238  | 0.745039239 | 0.877254752 |
| M204  | 3-methoxytyrosine                                      | Amino Acid                        | Tyrosine Metabolism                                          | 0.958976409  | -0.06043277  | 0.746153725 | 0.877430448 |
| M439  | methionine sulfone                                     | Amino Acid                        | Methionine, Cysteine, SAM and Taurine Metabolism             | 0.945335567  | -0.081104612 | 0.749801524 | 0.88058086  |
| M4209 | orotidine                                              | Nucleotide                        | Pyrimidine Metabolism, Orotate containing                    | 0.882577262  | -0.180205516 | 0.753617222 | 0.883920071 |
| M3052 | ceramide (d18:2/24:1, d18:1/24:2)*                     | Lipid                             | Ceramides                                                    | 1.026686248  | 0.037995366  | 0.75480902  | 0.884177061 |
| M2536 | 1-palmitoyl-2-linoleoyl-GPI (16:0/18:2)                | Lipid                             | Phosphatidylinositol (PI)                                    | 0.96986763   | -0.044140237 | 0.759698272 | 0.885410445 |
| M36   | aspartate                                              | Amino Acid                        | Alanine and Aspartate Metabolism                             | 0.963110647  | -0.054226543 | 0.759362068 | 0.885410445 |
| M4435 | beta-cryptoxanthin                                     | Cofactors and Vitamins            | Vitamin A Metabolism                                         | 1.08685227   | 0.120155855  | 0.759758138 | 0.885410445 |
| M4451 | pyridoxate                                             | Cofactors and Vitamins            | Vitamin B6 Metabolism                                        | 1.047124928  | 0.066433575  | 0.757379008 | 0.885410445 |
| M4963 | methyl indole-3-acetate                                | Xenobiotics                       | Food Component/Plant                                         | 0.921225571  | -0.118373638 | 0.762005594 | 0.886892555 |
| M2322 | 1-stearoyl-2-oleoyl-GPC (18:0/18:1)                    | Lipid                             | Phosphatidylcholine (PC)                                     | 1.019459304  | 0.027804185  | 0.768903653 | 0.893776753 |
| M16   | 2-methylserine                                         | Amino Acid                        | Glycine, Serine and Threonine Metabolism                     | 0.9433396371 | -0.084064043 | 0.774289524 | 0.897741297 |
| M546  | N(1)-acetylsermidine                                   | Amino Acid                        | Polyamine Metabolism                                         | 0.892677373  | -0.163789237 | 0.7740241   | 0.897741297 |
| M1755 | 2-aminooctanoate                                       | Lipid                             | Fatty Acid, Amino                                            | 1.101723038  | 0.13976159   | 0.775840615 | 0.898393782 |
| M1886 | oleoylcarnitine (C18:1)                                | Lipid                             | Fatty Acid Metabolism (Acyl Carnitine, Monounsaturated)      | 0.972098483  | -0.040825615 | 0.778803789 | 0.900677665 |
| M2861 | 1-dihomo-linoleylglycerol (20:3)                       | Lipid                             | Monooacylglycerol                                            | 0.951711633  | -0.071403589 | 0.785397168 | 0.906498532 |
| M2444 | 1-oleoyl-2-linoleoyl-GPE (18:1/18:2)*                  | Lipid                             | Phosphatidylethanolamine (PE)                                | 1.034514194  | 0.04895344   | 0.78737654  | 0.906498532 |
| M1932 | carnitine                                              | Lipid                             | Carnitine Metabolism                                         | 0.977914781  | -0.032219346 | 0.787898354 | 0.906498532 |
| M829  | glycylvaline                                           | Peptide                           | Dipeptide                                                    | 1.173960144  | 0.23138343   | 0.788832355 | 0.906498532 |
| M2907 | palmitoyl-linoleoyl-glycerol (16:0/18:2) [2]*          | Lipid                             | Diacylglycerol                                               | 0.967459554  | -0.047726746 | 0.788397547 | 0.906498532 |
| M3117 | sphingomyelin (d18:2/16:0, d18:1/16:1)*                | Lipid                             | Sphingomyelins                                               | 0.986989946  | -0.018879551 | 0.792048545 | 0.909055716 |
| M1768 | butyrylcarnitine (C4)                                  | Lipid                             | Fatty Acid Metabolism (also BCAA Metabolism)                 | 0.934485068  | -0.097756483 | 0.79796831  | 0.914695074 |
| M7    | betaine                                                | Amino Acid                        | Glycine, Serine and Threonine Metabolism                     | 0.982763707  | -0.025083514 | 0.799517692 | 0.915316854 |
| M428  | 3-hydroxyisobutyrate                                   | Amino Acid                        | Leucine, Isoleucine and Valine Metabolism                    | 1.03288729   | 0.046682833  | 0.80881092  | 0.916719608 |
| M119  | 5-hydroxylysine                                        | Amino Acid                        | Lysine Metabolism                                            | 0.977921194  | -0.032209885 | 0.808206722 | 0.916719608 |
| M578  | cys-gly, oxidized                                      | Amino Acid                        | Glutathione Metabolism                                       | 1.053807976  | 0.075612004  | 0.802337147 | 0.916719608 |
| M385  | isoleucine                                             | Amino Acid                        | Leucine, Isoleucine and Valine Metabolism                    | 0.985329583  | -0.021321723 | 0.807216044 | 0.916719608 |
| M419  | N-carbamoylvaline                                      | Amino Acid                        | Leucine, Isoleucine and Valine Metabolism                    | 0.95749577   | -0.062661982 | 0.804957621 | 0.916719608 |
| M114  | N6-methyllysine                                        | Amino Acid                        | Lysine Metabolism                                            | 1.061124268  | 0.085593619  | 0.808601594 | 0.916719608 |
| M3118 | sphingomyelin (d18:1/17:0, d17:1/18:0, d19:1/16:0)     | Lipid                             | Sphingomyelins                                               | 0.985934363  | -0.02043649  | 0.806245597 | 0.916719608 |
| M264  | tryptophan betaine                                     | Amino Acid                        | Tryptophan Metabolism                                        | 1.096110637  | 0.132393426  | 0.808689252 | 0.916719608 |
| M650  | gamma-glutamyl-2-aminobutyrate                         | Peptide                           | Gamma-glutamyl Amino Acid                                    | 1.027264198  | 0.038807271  | 0.81220471  | 0.918276221 |
| M1862 | myristoylcarnitine (C14)                               | Lipid                             | Fatty Acid Metabolism (Acyl Carnitine, Long Chain Saturated) | 0.971786579  | -0.041288587 | 0.811954644 | 0.918276221 |
| M2927 | oleoyl-linoleoyl-glycerol (18:1/18:2) [2]              | Lipid                             | Diacylglycerol                                               | 1.026481048  | 0.037706991  | 0.814573452 | 0.918669067 |
| M3311 | tetrahydrocortisol sulfate (1)                         | Lipid                             | Corticosteroids                                              | 1.149904986  | 0.201514659  | 0.81428497  | 0.918669067 |
| M2723 | 1-oleoyl-GPI (18:1)                                    | Lipid                             | Lysophospholipid                                             | 0.977635782  | -0.032631006 | 0.818416915 | 0.920426849 |
| M4300 | quinolinate                                            | Cofactors and Vitamins            | Nicotinate and Nicotinamide Metabolism                       | 0.965225043  | -0.051062748 | 0.81916977  | 0.920426849 |
| M4506 | 4-allylcatchol sulfate                                 | Xenobiotics                       | Benzoate Metabolism                                          | 0.908003119  | -0.139230842 | 0.817379883 | 0.92        |

|       |                                                      |                                   |                                                         |             |              |             |             |
|-------|------------------------------------------------------|-----------------------------------|---------------------------------------------------------|-------------|--------------|-------------|-------------|
| M6266 | 4-chlorobenzoic acid                                 | Xenobiotics                       | Chemical                                                | 1.003658354 | 0.005268258  | 0.843580779 | 0.922554802 |
| M563  | 4-guanidinobutanate                                  | Amino Acid                        | Guanidino and Acetamido Metabolism                      | 0.968488914 | -0.04619256  | 0.83908396  | 0.922554802 |
| M3206 | 7-HOCA                                               | Lipid                             | Sterol                                                  | 0.984760905 | -0.022154606 | 0.83144951  | 0.922554802 |
| M56   | beta-citrylglutamate                                 | Amino Acid                        | Glutamate Metabolism                                    | 1.049467897 | 0.069658035  | 0.846436419 | 0.922554802 |
| M1179 | Fibrinopeptide B (1-12)                              | Peptide                           | Fibrinogen Cleavage Peptide                             | 0.96896905  | -0.045477509 | 0.832621034 | 0.922554802 |
| M1346 | fructose                                             | Carbohydrate                      | Fructose, Mannose and Galactose Metabolism              | 0.978805412 | -0.030906017 | 0.844963597 | 0.922554802 |
| M643  | gamma-glutamylphenylalanine                          | Peptide                           | Gamma-glutamyl Amino Acid                               | 1.022511871 | 0.032117593  | 0.845994562 | 0.922554802 |
| M1243 | glycerate                                            | Carbohydrate                      | Glycolysis, Gluconeogenesis, and Pyruvate Metabolism    | 0.98727981  | -0.018469071 | 0.833851155 | 0.922554802 |
| M2241 | glycerophosphoserine*                                | Lipid                             | Phospholipid Metabolism                                 | 0.973524459 | -0.038710869 | 0.832621376 | 0.922554802 |
| M4501 | gualacol sulfate                                     | Xenobiotics                       | Benzoate Metabolism                                     | 0.864927137 | -0.209349492 | 0.8447945   | 0.922554802 |
| M4407 | heme                                                 | Cofactors and Vitamins            | Hemoglobin and Porphyrin Metabolism                     | 0.876797373 | -0.189684619 | 0.839298251 | 0.922554802 |
| M3525 | hyocholate                                           | Lipid                             | Secondary Bile Acid Metabolism                          | 1.049077295 | 0.069120979  | 0.838777239 | 0.922554802 |
| M73   | N-acetylhistidine                                    | Amino Acid                        | Histidine Metabolism                                    | 1.061806033 | 0.086520244  | 0.840627303 | 0.922554802 |
| M190  | phenol sulfate                                       | Amino Acid                        | Tyrosine Metabolism                                     | 0.894452156 | -0.16092378  | 0.831418562 | 0.922554802 |
| M4450 | pyridoxal                                            | Cofactors and Vitamins            | Vitamin B6 Metabolism                                   | 0.991746525 | -0.011956657 | 0.845688701 | 0.922554802 |
| M3109 | sphingomyelin (d18:2/18:1)*                          | Lipid                             | Sphingomyelins                                          | 1.012351496 | 0.017710292  | 0.84105909  | 0.922554802 |
| M1879 | 3-decenoylcarnitine                                  | Lipid                             | Fatty Acid Metabolism (Acyl Carnitine, Monounsaturated) | 1.022306106 | 0.031827243  | 0.852238633 | 0.927766368 |
| M3500 | glycolithocholate sulfate*                           | Lipid                             | Secondary Bile Acid Metabolism                          | 1.057694314 | 0.080927232  | 0.856679582 | 0.931485335 |
| M1985 | 3-hydroxylaurate                                     | Lipid                             | Fatty Acid, Monohydroxy                                 | 1.025227637 | 0.035944275  | 0.8599252   | 0.932782824 |
| M5328 | N-methylpecolate                                     | Xenobiotics                       | Bacterial/Fungal                                        | 0.932919419 | -0.100175622 | 0.859173447 | 0.932782824 |
| M91   | 1-methyl-4-imidazoleacetate                          | Amino Acid                        | Histidine Metabolism                                    | 0.935548255 | -0.096116027 | 0.863597732 | 0.935649986 |
| M4360 | alpha-tocopherol                                     | Cofactors and Vitamins            | Tocopherol Metabolism                                   | 1.010724676 | 0.015390057  | 0.864667416 | 0.935693668 |
| M3504 | ursodeoxycholate                                     | Lipid                             | Secondary Bile Acid Metabolism                          | 0.87720144  | -0.189019914 | 0.866827445 | 0.936915752 |
| M1564 | docosatrienoate (22:3n3)                             | Lipid                             | Long Chain Polyunsaturated Fatty Acid (n3 and n6)       | 0.978350184 | -0.031577148 | 0.872251594 | 0.94165916  |
| M407  | ethylmalonate                                        | Amino Acid                        | Leucine, Isoleucine and Valine Metabolism               | 0.954559298 | -0.067093273 | 0.876696167 | 0.945334301 |
| M4408 | bilirubin                                            | Cofactors and Vitamins            | Hemoglobin and Porphyrin Metabolism                     | 0.983450724 | -0.024075327 | 0.881303418 | 0.949176311 |
| M2543 | 1-stearoyl-2-linoleoyl-GPI (18:0/18:2)               | Lipid                             | Phosphatidylinositol (PI)                               | 1.01363764  | 0.019542004  | 0.88872803  | 0.949299389 |
| M1966 | 2-hydroxylaurate                                     | Lipid                             | Fatty Acid, Monohydroxy                                 | 0.989906796 | -0.0146354   | 0.883941676 | 0.949299389 |
| M1927 | 3-hydroxydecanoylcarnitine                           | Lipid                             | Fatty Acid Metabolism (Acyl Carnitine, Hydroxy)         | 1.019307387 | 0.027589182  | 0.88389277  | 0.949299389 |
| M6445 | bilirubin degradation product, C17H18N2O4 (1)        | Partially Characterized Molecules | Partially Characterized Molecules                       | 1.022123006 | 0.031568827  | 0.887716158 | 0.949299389 |
| M2941 | linoleoyl-arachidonoyl-glycerol (18:2/20:4) [1]*     | Lipid                             | Diacylglycerol                                          | 0.982155486 | -0.025976658 | 0.887751933 | 0.949299389 |
| M227  | N-formylphenylalanine                                | Amino Acid                        | Tyrosine Metabolism                                     | 1.051456037 | 0.072388529  | 0.887814411 | 0.949299389 |
| M3103 | palmitoyl sphingomyelin (d18:1/16:0)                 | Lipid                             | Sphingomyelins                                          | 1.004394007 | 0.006325325  | 0.887507518 | 0.949299389 |
| M3484 | deoxycholic acid glucuronide                         | Lipid                             | Secondary Bile Acid Metabolism                          | 0.970658812 | -0.042963819 | 0.892751055 | 0.952477358 |
| M4498 | catechol sulfate                                     | Xenobiotics                       | Benzoate Metabolism                                     | 0.904368552 | -0.145017269 | 0.894859746 | 0.953101743 |
| M647  | gamma-glutamylvaline                                 | Peptide                           | Gamma-glutamyl Amino Acid                               | 0.985861084 | -0.020543722 | 0.89543332  | 0.953101743 |
| M2862 | 1-arachidonylglycerol (20:4)                         | Lipid                             | Monooacylglycerol                                       | 0.982289309 | -0.025780097 | 0.898099324 | 0.953705941 |
| M4304 | nicotinamide                                         | Cofactors and Vitamins            | Nicotinate and Nicotinamide Metabolism                  | 0.96197114  | -0.055934482 | 0.897856822 | 0.953705941 |
| M1668 | 3-hydroxydipate                                      | Lipid                             | Fatty Acid, Dicarboxylate                               | 0.976030547 | -0.035001794 | 0.904082316 | 0.957821475 |
| M416  | valine                                               | Amino Acid                        | Leucine, Isoleucine and Valine Metabolism               | 1.006974601 | 0.010072794  | 0.903458043 | 0.957821475 |
| M6444 | bilirubin degradation product, C16H18N2O5 (2)        | Partially Characterized Molecules | Partially Characterized Molecules                       | 1.025783586 | 0.036726392  | 0.907313054 | 0.959505635 |
| M1700 | octadecadienedioate (C18:2-DC)*                      | Lipid                             | Fatty Acid, Dicarboxylate                               | 0.966976142 | -0.043978833 | 0.907783109 | 0.959505635 |
| M519  | N,N,N-trimethyl-alanylproline betaine (TMAP)         | Amino Acid                        | Urea cycle; Arginine and Proline Metabolism             | 0.986576923 | -0.019496553 | 0.910876179 | 0.961566732 |
| M2906 | palmitoyl-linoleoyl-glycerol (16:0/18:2) [1]*        | Lipid                             | Diacylglycerol                                          | 1.015859786 | 0.022701288  | 0.912337989 | 0.962082366 |
| M1973 | 2-hydroxyarachidate*                                 | Lipid                             | Fatty Acid, Monohydroxy                                 | 0.993420131 | -0.009524112 | 0.917358185 | 0.965137257 |
| M86   | N-acetylcamosine                                     | Amino Acid                        | Histidine Metabolism                                    | 0.986757577 | -0.019234202 | 0.912790466 | 0.965137257 |
| M6446 | bilirubin degradation product, C17H18N2O4 (2)        | Partially Characterized Molecules | Partially Characterized Molecules                       | 1.015629361 | 0.022374007  | 0.924977089 | 0.965340195 |
| M1860 | decanoylcarnitine (C10)                              | Lipid                             | Fatty Acid Metabolism (Acyl Carnitine, Medium Chain)    | 1.011231367 | 0.01611312   | 0.924020312 | 0.965340195 |
| M1674 | heptenedioate (C7:1-DC)*                             | Lipid                             | Fatty Acid, Dicarboxylate                               | 0.985439937 | -0.021160153 | 0.919987858 | 0.965340195 |
| M4191 | N2-methylguanosine                                   | Nucleotide                        | Purine Metabolism, Guanine containing                   | 0.988637585 | -0.016486341 | 0.924984939 | 0.965340195 |
| M151  | phenyllactate (PLA)                                  | Amino Acid                        | Phenylalanine Metabolism                                | 1.016908472 | 0.024189834  | 0.921980537 | 0.965340195 |
| M1239 | pyruvate                                             | Carbohydrate                      | Glycolysis, Gluconeogenesis, and Pyruvate Metabolism    | 0.989344536 | -0.015455072 | 0.920157085 | 0.965340195 |
| M3127 | sphingomyelin (d18:1/22:2, d18:2/22:1, d16:1/24:2)*  | Lipid                             | Sphingomyelins                                          | 0.994231792 | -0.008345858 | 0.92234292  | 0.965340195 |
| M1681 | sebacate (C10-DC)                                    | Lipid                             | Fatty Acid, Dicarboxylate                               | 1.019985974 | 0.028549314  | 0.926216894 | 0.965517382 |
| M1920 | (5)-3-hydroxybutyrylcarnitine                        | Lipid                             | Fatty Acid Metabolism (Acyl Carnitine, Hydroxy)         | 1.016556677 | 0.023690653  | 0.937486639 | 0.967411331 |
| M580  | 2-aminobutyrate                                      | Amino Acid                        | Glutathione Metabolism                                  | 0.993112716 | -0.009970625 | 0.937217255 | 0.967411331 |
| M1982 | 3-hydroxydecanoate                                   | Lipid                             | Fatty Acid, Monohydroxy                                 | 1.011250477 | 0.016140389  | 0.935402208 | 0.967411331 |
| M1925 | 3-hydroxyoctanoylcarnitine (2)                       | Lipid                             | Fatty Acid Metabolism (Acyl Carnitine, Hydroxy)         | 1.0106553   | 0.015291027  | 0.937612082 | 0.967411331 |
| M3368 | androstenediol (3alpha, 17alpha) monosulfate (3)     | Lipid                             | Androgenic Steroids                                     | 0.984800454 | -0.022096668 | 0.929466478 | 0.967411331 |
| M1682 | decadienedioic acid (C10:2-DC)                       | Lipid                             | Fatty Acid, Dicarboxylate                               | 0.985764827 | -0.02068459  | 0.933824275 | 0.967411331 |
| M1136 | glu-gly-asn-val                                      | Peptide                           | Polypeptide                                             | 0.979812947 | -0.029421739 | 0.936012555 | 0.967411331 |
| M1219 | N,N-dimethyl-pro-pro                                 | Peptide                           | Modified Peptides                                       | 0.987616894 | -0.01797658  | 0.930785764 | 0.967411331 |
| M3111 | sphingomyelin (d18:2/24:2)*                          | Lipid                             | Sphingomyelins                                          | 0.995819545 | -0.006043763 | 0.934041596 | 0.967411331 |
| M367  | 3-methylglutaconate                                  | Amino Acid                        | Leucine, Isoleucine and Valine Metabolism               | 0.992017959 | -0.011561856 | 0.938907221 | 0.967649779 |
| M2303 | 1-palmitoyl-2-docosahexaenoyl-GPC (16:0/22:6)        | Lipid                             | Phosphatidylcholine (PC)                                | 0.996454903 | -0.005123581 | 0.940779986 | 0.968481322 |
| M1931 | deoxycarnitine                                       | Lipid                             | Carnitine Metabolism                                    | 1.00669191  | 0.009622226  | 0.947731235 | 0.973432421 |
| M400  | tiglyl carnitine (C5)                                | Amino Acid                        | Leucine, Isoleucine and Valine Metabolism               | 0.987672223 | -0.017895759 | 0.947428582 | 0.973432421 |
| M1472 | malonate                                             | Lipid                             | Fatty Acid Synthesis                                    | 1.003498294 | 0.005038164  | 0.949176693 | 0.97381672  |
| M4164 | N6-carbamoylthreonyladenosine                        | Nucleotide                        | Purine Metabolism, Adenine containing                   | 0.990349547 | -0.013990275 | 0.952358706 | 0.975979779 |
| M1705 | 3-carboxy-4-methyl-5-propyl-2-furanpropanoate (CMPF) | Lipid                             | Fatty Acid, Dicarboxylate                               | 0.992065208 | -0.011493143 | 0.960766318 | 0.982716545 |
| M1529 | palmitoleate (16:1n7)                                | Lipid                             | Long Chain Monounsaturated Fatty Acid                   | 1.007337689 | 0.010547398  | 0.961094619 | 0.982716545 |
| M2452 | 1,2-dilinoleoyl-GPE (18:2/18:2)*                     | Lipid                             | Phosphatidylethanolamine (PE)                           | 0.990975204 | -0.013079136 | 0.965419347 | 0.983818595 |
| M577  | cysteinyglycine disulfide*                           | Amino Acid                        | Glutathione Metabolism                                  | 0.996022224 | -0.005750162 | 0.964479828 | 0.983818595 |
| M1902 | docosahexaenoylcarnitine (C22:6)*                    | Lipid                             | Fatty Acid Metabolism (Acyl Carnitine, Polyunsaturated) | 1.005350041 | 0.007697903  | 0.965398872 | 0.983818595 |
| M6449 | bilirubin degradation product, C17H20N2O5 (2)        | Partially Characterized Molecules | Partially Characterized Molecules                       | 1.010048802 | 0.014425     | 0.966667968 | 0.983978877 |
| M1919 | (R)-3-hydroxybutyrylcarnitine                        | Lipid                             | Fatty Acid Metabolism (Acyl Carnitine, Hydroxy)         | 1.0120986   | 0.017349846  | 0.972103343 | 0.987309429 |
| M2942 | linoleoyl-arachidonoyl-glycerol (18:2/20:4) [2]*     | Lipid                             | Diacylglycerol                                          | 0.99535168  | -0.006721743 | 0.971344035 | 0.987309429 |
| M2196 | N-oleylserine                                        | Lipid                             | Endocannabinoid                                         | 0.997808447 | -0.003165212 | 0.974769109 | 0.988911964 |
| M544  | N-acetyl-isoptreanine                                | Amino Acid                        | Polyamine Metabolism                                    | 0.988388594 | -0.016849733 | 0.980188307 | 0.993301194 |
| M3193 | cholesterol sulfate                                  | Lipid                             | Sterol                                                  | 0.998129639 | -0.002700887 | 0.98596133  | 0.994065844 |
| M4364 | delta-tocopherol                                     | Cofactors and Vitamins            | Tocopherol Metabolism                                   | 0.995742615 | -0.006155221 | 0.983944747 | 0.994065844 |
| M1774 | methylmalonate (MMA)                                 | Lipid                             | Fatty Acid Metabolism (also BCAA Metabolism)            | 0.997584721 | -0.003488726 | 0.983950463 | 0.994065844 |
| M4999 | phytanate                                            | Xenobiotics                       | Food Component/Plant                                    | 1.002820255 | 0.004063042  | 0.987382716 | 0.994065844 |
| M5073 | tartrate                                             | Xenobiotics                       | Food Component/Plant                                    | 1.008141409 | 0.011698016  | 0.98686573  | 0.994065844 |
| M6239 | thioproline                                          | Xenobiotics                       | Chemical                                                | 0.99876254  | -0.001786384 | 0.987504353 | 0.994065844 |
| M110  | N2-acetyl,N6,N6-dimethyllysine                       | Amino Acid                        | Lysine Metabolism                                       | 1.008062907 | 0.011585672  | 0.988647453 | 0.994115636 |
| M2877 | 1-heptadecanoylglycerol (17:1)*                      | Lipid                             | Monooacylglycerol                                       | 1.003279287 | 0.004723271  | 0.993270674 | 0.995460907 |
| M4352 | 2-O-methylascorbic acid                              | Cofactors and Vitamins            | Ascorbate and Aldarate Metabolism                       | 0.998995618 | -0.001449745 | 0.992298196 | 0.995460907 |
| M405  | 3-hydroxy-2-ethylpropionate                          | Amino Acid                        | Leucine, Isoleucine and Valine Metabolism               | 1.000998019 | 0.001439119  | 0.993042798 | 0.995460907 |
| M3175 | 3-hydroxy-3-methylglutarate                          | Lipid                             | Mevalonate Metabolism                                   | 0.999428882 | -0.000824185 | 0.99518751  | 0.996283531 |
| M6448 | bilirubin degradation product, C17H20N2O5 (1)        | Partially Characterized Molecules | Partially Characterized Molecules                       | 1.000653923 | 0.000943103  | 0.997811761 | 0.997811761 |

**Supplementary data 4: Serum metabolites associated with gut Akkermansia abundance**

**Column D: PCM = Partially Characterized Molecules**

*p* values are from mixed effect regression. *q* values are derived from *p* values after FDR correction for multiple testing

Color coding in column E was applied along the regression coefficient gradient, with blue and red representing negative and positive association with Akkermansia abundance, respectively

Color coding in column G was applied along the *q* value gradient, with darker colors indicating more significant values

| code  | metabolite                                                      | pathway                           | sub_pathway                                             | regression coefficient | <i>p</i> | <i>q</i> |
|-------|-----------------------------------------------------------------|-----------------------------------|---------------------------------------------------------|------------------------|----------|----------|
| M3342 | epiandrosterone sulfate                                         | Lipid                             | Androgenic Steroids                                     | 0.158                  | 0.0000   | 0.0003   |
| M6422 | metabolonic lactone sulfate                                     | Partially Characterized Molecules | PCM                                                     | 0.100                  | 0.0000   | 0.0005   |
| M4552 | p-cresol sulfate                                                | Xenobiotics                       | Benzoate Metabolism                                     | 0.210                  | 0.0000   | 0.0005   |
| M4505 | 4-methylcatechol sulfate                                        | Xenobiotics                       | Benzoate Metabolism                                     | 0.218                  | 0.0000   | 0.0006   |
| M3368 | androstenediol (3alpha, 17alpha) monosulfate (3)                | Lipid                             | Androgenic Steroids                                     | 0.145                  | 0.0001   | 0.0018   |
| M3350 | androsterone sulfate                                            | Lipid                             | Androgenic Steroids                                     | 0.149                  | 0.0001   | 0.0026   |
| M322  | 3-indoxyl sulfate                                               | Amino Acid                        | Tryptophan Metabolism                                   | 0.204                  | 0.0003   | 0.0047   |
| M1187 | phenylacetylglutamine                                           | Peptide                           | Acetylated Peptides                                     | 0.151                  | 0.0003   | 0.0049   |
| M3337 | dehydroepiandrosterone sulfate (DHEA-S)                         | Lipid                             | Androgenic Steroids                                     | 0.130                  | 0.0004   | 0.0052   |
| M6152 | dimethyl sulfone                                                | Xenobiotics                       | Chemical                                                | 0.119                  | 0.0008   | 0.0096   |
| M1184 | phenylacetylcarnitine                                           | Peptide                           | Acetylated Peptides                                     | 0.164                  | 0.0008   | 0.0104   |
| M6235 | 6-hydroxyindole sulfate                                         | Xenobiotics                       | Chemical                                                | 0.140                  | 0.0010   | 0.0116   |
| M4938 | indolin-2-one                                                   | Xenobiotics                       | Food Component/Plant                                    | 0.130                  | 0.0012   | 0.0139   |
| M6446 | bilirubin degradation product, C17H18N2O4 (2)                   | Partially Characterized Molecules | PCM                                                     | -0.102                 | 0.0015   | 0.0159   |
| M4462 | hippurate                                                       | Xenobiotics                       | Benzoate Metabolism                                     | 0.128                  | 0.0017   | 0.0173   |
| M3502 | tauroolithocholate 3-sulfate                                    | Lipid                             | Secondary Bile Acid Metabolism                          | 0.159                  | 0.0017   | 0.0176   |
| M6447 | bilirubin degradation product, C17H18N2O4 (3)                   | Partially Characterized Molecules | PCM                                                     | -0.102                 | 0.0018   | 0.0178   |
| M576  | cysteinylglycine                                                | Amino Acid                        | Glutathione Metabolism                                  | 0.131                  | 0.0022   | 0.0211   |
| M4498 | catechol sulfate                                                | Xenobiotics                       | Benzoate Metabolism                                     | 0.140                  | 0.0025   | 0.0232   |
| M6449 | bilirubin degradation product, C17H20N2O5 (2)                   | Partially Characterized Molecules | PCM                                                     | -0.110                 | 0.0027   | 0.0251   |
| M6445 | bilirubin degradation product, C17H18N2O4 (1)                   | Partially Characterized Molecules | PCM                                                     | -0.098                 | 0.0028   | 0.0259   |
| M3131 | sphingomyelin (d18:1/25:0, d19:0/24:1, d20:1/23:0, d19:1/24:0)* | Lipid                             | Sphingomyelins                                          | 0.059                  | 0.0029   | 0.0262   |
| M3490 | taurodeoxycholic acid 3-sulfate                                 | Lipid                             | Secondary Bile Acid Metabolism                          | 0.132                  | 0.0029   | 0.0262   |
| M3107 | tricosanoyl sphingomyelin (d18:1/23:0)*                         | Lipid                             | Sphingomyelins                                          | 0.052                  | 0.0030   | 0.0269   |
| M56   | beta-citrylglutamate                                            | Amino Acid                        | Glutamate Metabolism                                    | -0.094                 | 0.0031   | 0.0279   |
| M489  | 3-amino-2-piperidone                                            | Amino Acid                        | Urea cycle; Arginine and Proline Metabolism             | 0.073                  | 0.0040   | 0.0338   |
| M468  | cysteine sulfinic acid                                          | Amino Acid                        | Methionine, Cysteine, SAM and Taurine Metabolism        | -0.079                 | 0.0044   | 0.0360   |
| M3540 | glycodeoxycholate 3-sulfate                                     | Lipid                             | Secondary Bile Acid Metabolism                          | 0.129                  | 0.0053   | 0.0410   |
| M4501 | gualaicol sulfate                                               | Xenobiotics                       | Benzoate Metabolism                                     | 0.128                  | 0.0054   | 0.0413   |
| M3500 | glycolithocholate sulfate*                                      | Lipid                             | Secondary Bile Acid Metabolism                          | 0.136                  | 0.0056   | 0.0424   |
| M6448 | bilirubin degradation product, C17H20N2O5 (1)                   | Partially Characterized Molecules | PCM                                                     | -0.105                 | 0.0057   | 0.0426   |
| M1891 | linoleoylcarnitine (C18:2)*                                     | Lipid                             | Fatty Acid Metabolism (Acyl Carnitine, Polyunsaturated) | -0.076                 | 0.0057   | 0.0426   |
| M3120 | sphingomyelin (d18:1/19:0, d19:1/18:0)*                         | Lipid                             | Sphingomyelins                                          | 0.050                  | 0.0061   | 0.0452   |
| M3124 | sphingomyelin (d18:1/21:0, d17:1/22:0, d16:1/23:0)*             | Lipid                             | Sphingomyelins                                          | 0.051                  | 0.0063   | 0.0460   |
| M1439 | citrate                                                         | Energy                            | TCA Cycle                                               | -0.063                 | 0.0064   | 0.0462   |
| M4435 | beta-cryptoxanthin                                              | Cofactors and Vitamins            | Vitamin A Metabolism                                    | 0.053                  | 0.0075   | 0.0527   |
| M3113 | sphingomyelin (d18:1/14:0, d16:1/16:0)*                         | Lipid                             | Sphingomyelins                                          | 0.032                  | 0.0085   | 0.0577   |
| M3050 | ceramide (d18:1/20:0, d16:1/22:0, d20:1/18:0)*                  | Lipid                             | Ceramides                                               | 0.053                  | 0.0086   | 0.0583   |
| M4433 | carotene diol (3)                                               | Cofactors and Vitamins            | Vitamin A Metabolism                                    | 0.073                  | 0.0088   | 0.0586   |
| M6261 | dibutyl sulfosuccinate                                          | Xenobiotics                       | Chemical                                                | 0.096                  | 0.0090   | 0.0597   |
| M3119 | sphingomyelin (d18:1/18:1, d18:2/18:0)                          | Lipid                             | Sphingomyelins                                          | 0.047                  | 0.0099   | 0.0643   |
| M1917 | octadecanedioylcarnitine (C18-DC)*                              | Lipid                             | Fatty Acid Metabolism (Acyl Carnitine, Dicarboxylate)   | -0.084                 | 0.0102   | 0.0656   |
| M3105 | stearoyl sphingomyelin (d18:1/18:0)                             | Lipid                             | Sphingomyelins                                          | 0.047                  | 0.0105   | 0.0671   |
| M1679 | azelate (C9-DC)                                                 | Lipid                             | Fatty Acid, Dicarboxylate                               | -0.082                 | 0.0119   | 0.0734   |
| M455  | cysteine                                                        | Amino Acid                        | Methionine, Cysteine, SAM and Taurine Metabolism        | 0.085                  | 0.0126   | 0.0770   |
| M3118 | sphingomyelin (d18:1/17:0, d17:1/18:0, d19:1/16:0)              | Lipid                             | Sphingomyelins                                          | 0.045                  | 0.0132   | 0.0800   |
| M114  | N6-methyllysine                                                 | Amino Acid                        | Lysine Metabolism                                       | -0.066                 | 0.0140   | 0.0829   |
| M5077 | thymol sulfate                                                  | Xenobiotics                       | Food Component/Plant                                    | 0.123                  | 0.0154   | 0.0895   |
| M1750 | 2-aminoheptanoate                                               | Lipid                             | Fatty Acid, Amino                                       | -0.070                 | 0.0156   | 0.0905   |
| M4300 | quinolinate                                                     | Cofactors and Vitamins            | Nicotinate and Nicotinamide Metabolism                  | -0.070                 | 0.0176   | 0.0994   |
| M1    | glycine                                                         | Amino Acid                        | Glycine, Serine and Threonine Metabolism                | -0.057                 | 0.0178   | 0.0999   |

**Supplementary data 5: Putative metabolites mediating the Akkermansia-NF association**

$\beta$  is the regression coefficient in mixed effect regression predicting metabolite level by Akkermansia abundance

Positive (negative) values of  $\beta$  indicate metabolite rise (decline) after Akkermansia expansion

$q$  values in column C are corrected  $p$  values from mixed effect regression, corresponding to  $\beta$

Fold change is based on serum samples preceding vs. not preceding NF within 24 hours

$q$  values in column E are corrected  $p$  values from Welch's t-test comparing serum samples preceding vs. not preceding NF within 24 hours

| metabolite                                                      | $\beta$ (metabolite vs. Akkermansia) | $q$ (metabolite vs. Akkermansia) | foldchange | $q$ (NF) |
|-----------------------------------------------------------------|--------------------------------------|----------------------------------|------------|----------|
| p-cresol sulfate                                                | 0.210153264                          | 0.00049063                       | 0.4933     | 0.0879   |
| 3-indoxyl sulfate                                               | 0.204089017                          | 0.004662192                      | 0.5498     | 0.0638   |
| 6-hydroxyindole sulfate                                         | 0.140246154                          | 0.011644726                      | 0.5451     | 0.0539   |
| cysteinylglycine                                                | 0.130635552                          | 0.021064972                      | 1.6835     | 0.0137   |
| hippurate                                                       | 0.127784355                          | 0.017316218                      | 0.4895     | 0.0299   |
| dibutyl sulfosuccinate                                          | 0.096004592                          | 0.059714762                      | 0.4046     | 0.0197   |
| sphingomyelin (d18:1/25:0, d19:0/24:1, d20:1/23:0, d19:1/24:0)* | 0.059086145                          | 0.026239566                      | 0.8227     | 0.0607   |
| tricosanoyl sphingomyelin (d18:1/23:0)*                         | 0.052243326                          | 0.026938199                      | 0.8397     | 0.0607   |
| glycine                                                         | -0.056601391                         | 0.099927209                      | 0.7412     | 0.0011   |
